# Supplementary material for: Insulin Receptor-Related Receptor Regulates the Rate of Early Development in Xenopus laevis
Source: MDPI journal article supplement (doi:10.3390/ijms23169250), 2022-08-17

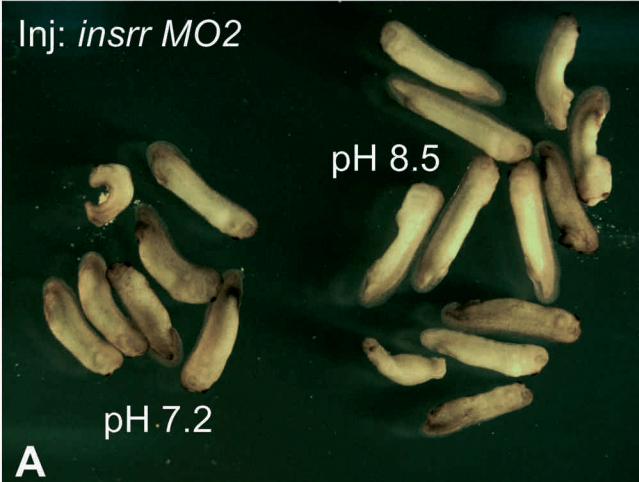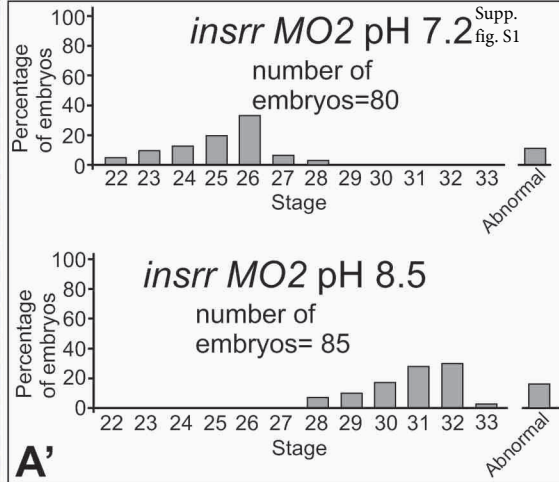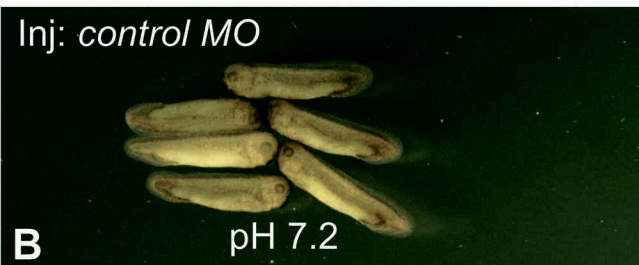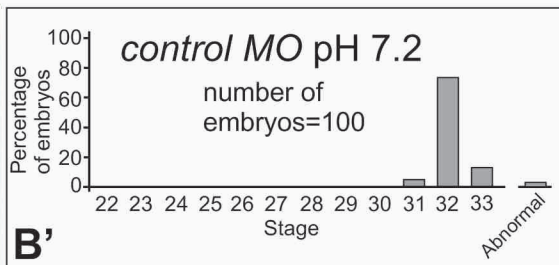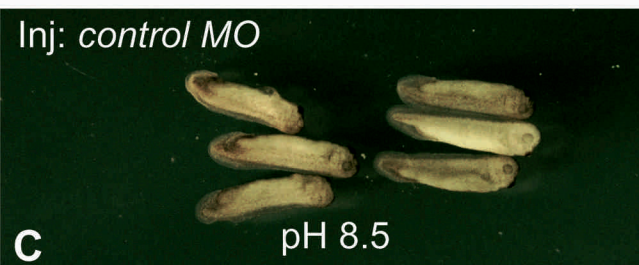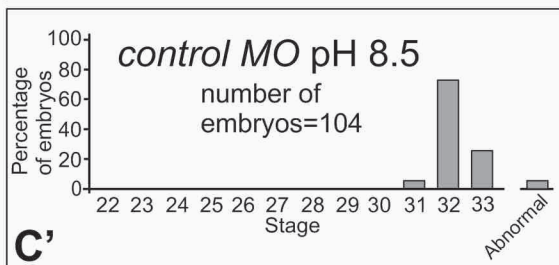

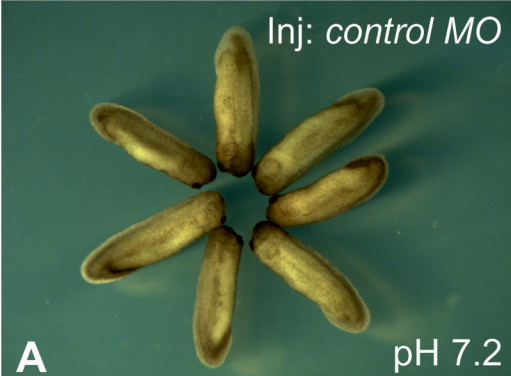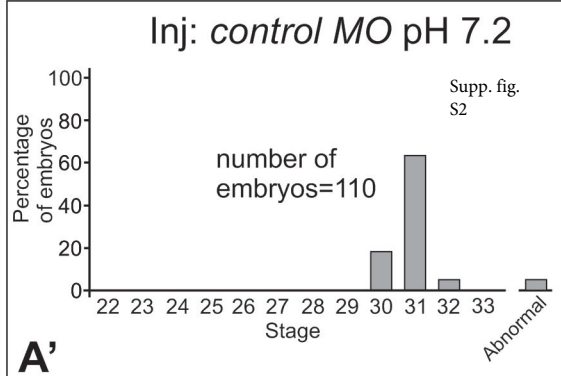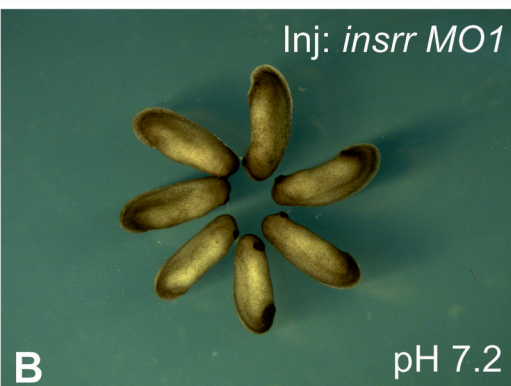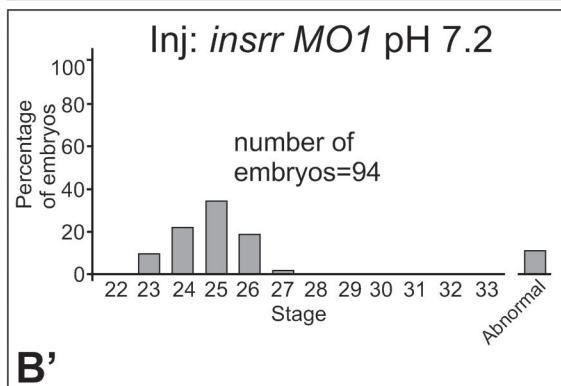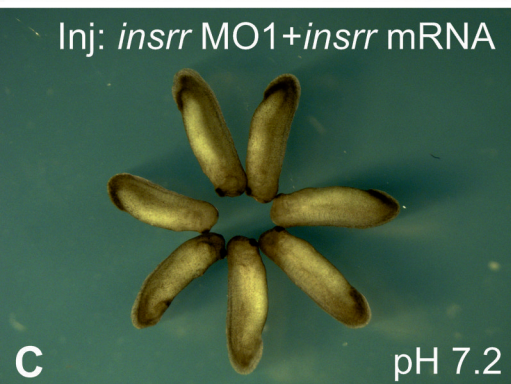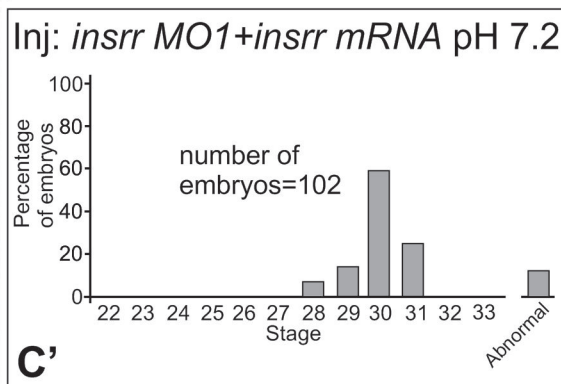



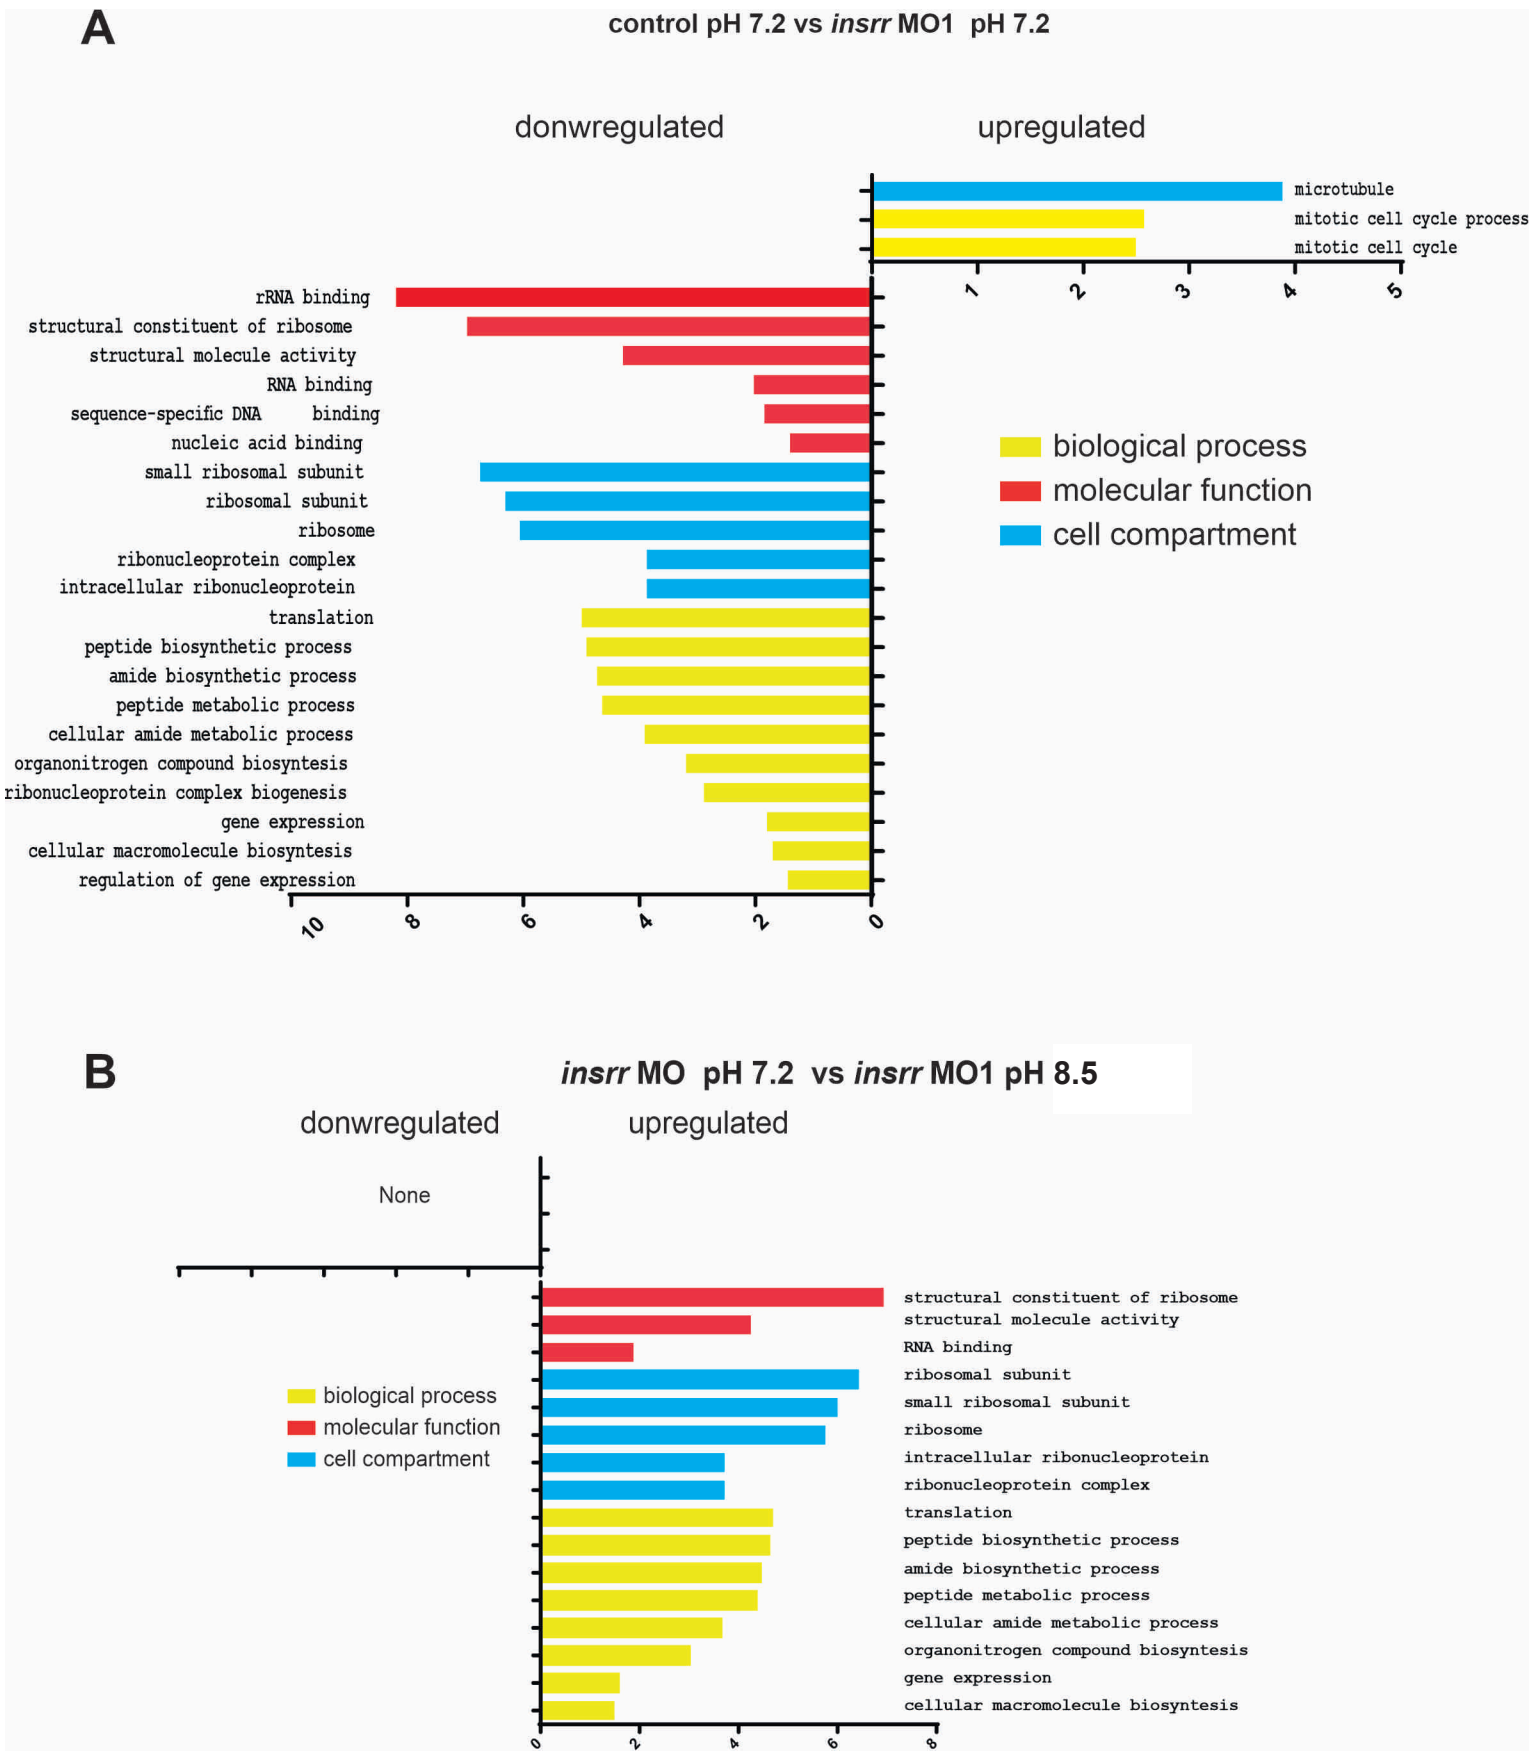

A

padj<0.01

*insrr* MO 7.2/control 7.2    *insrr* MO 8.5/*insrr* MO 7.2

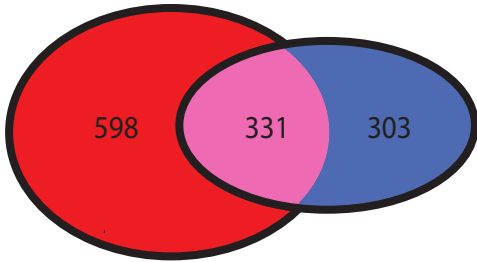

B

Fold Change

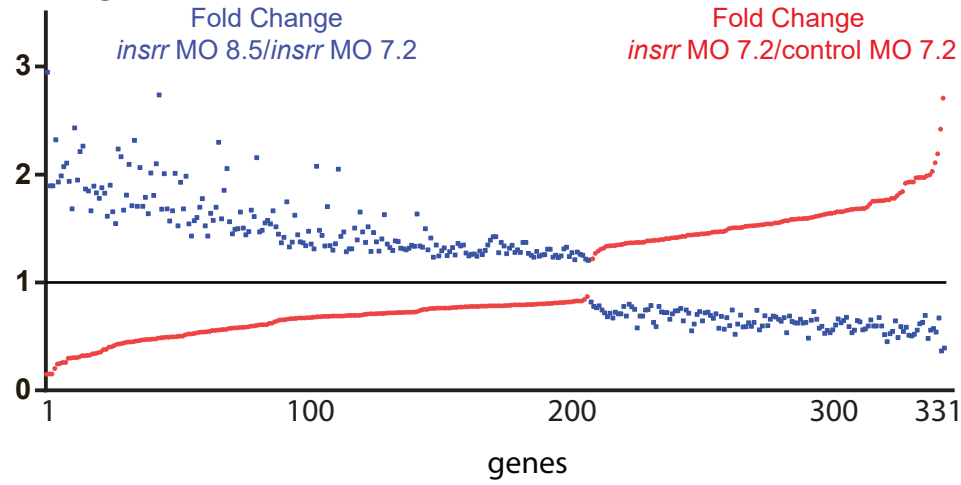

C

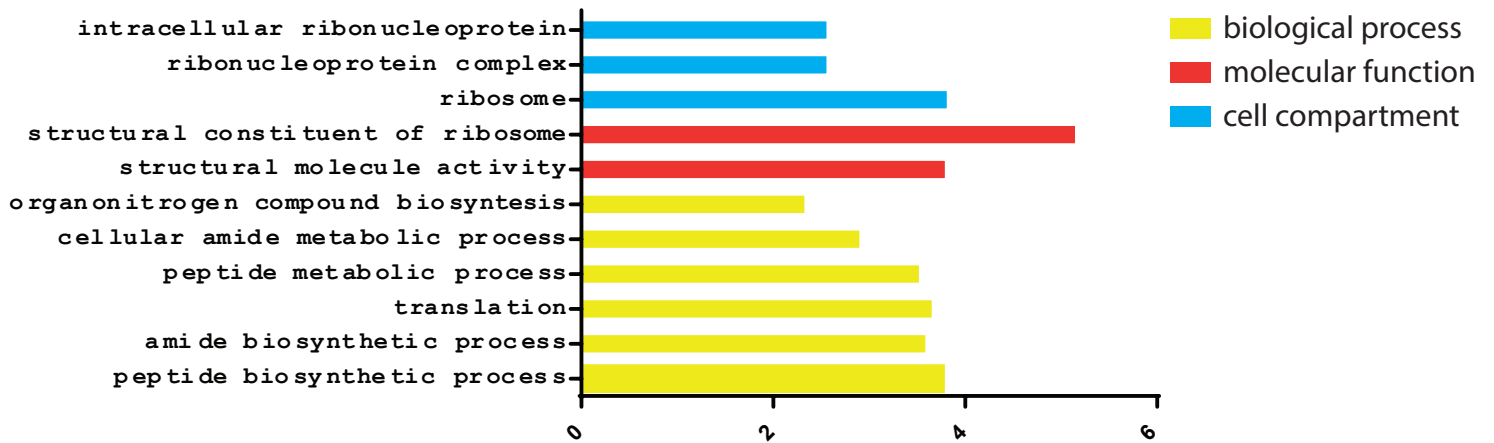

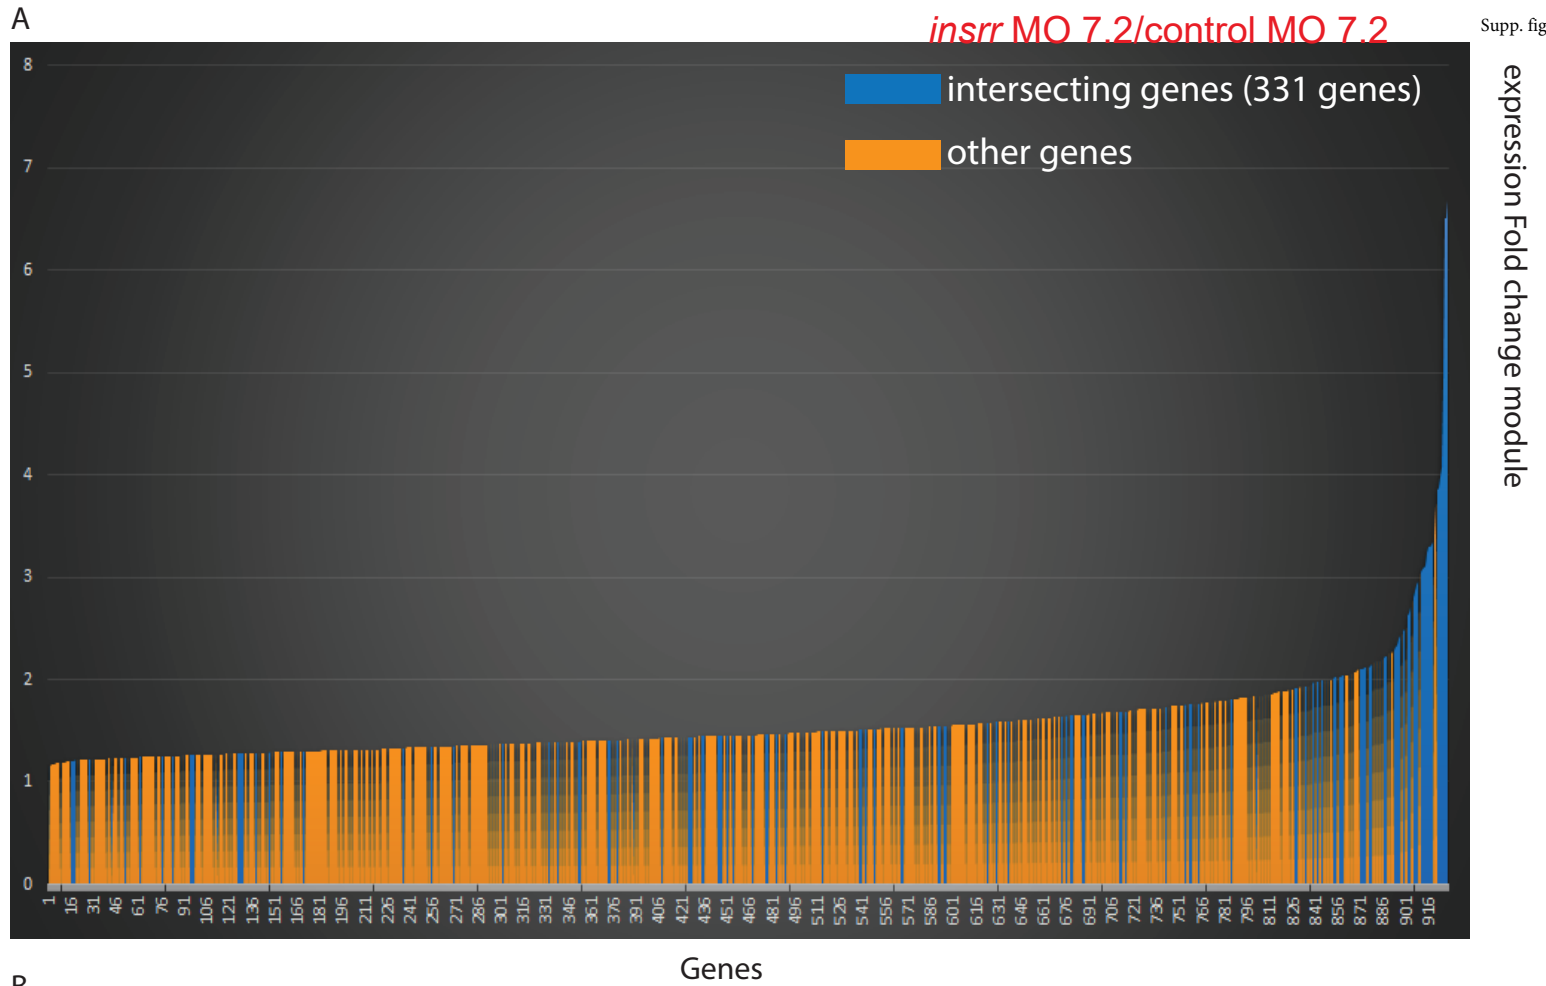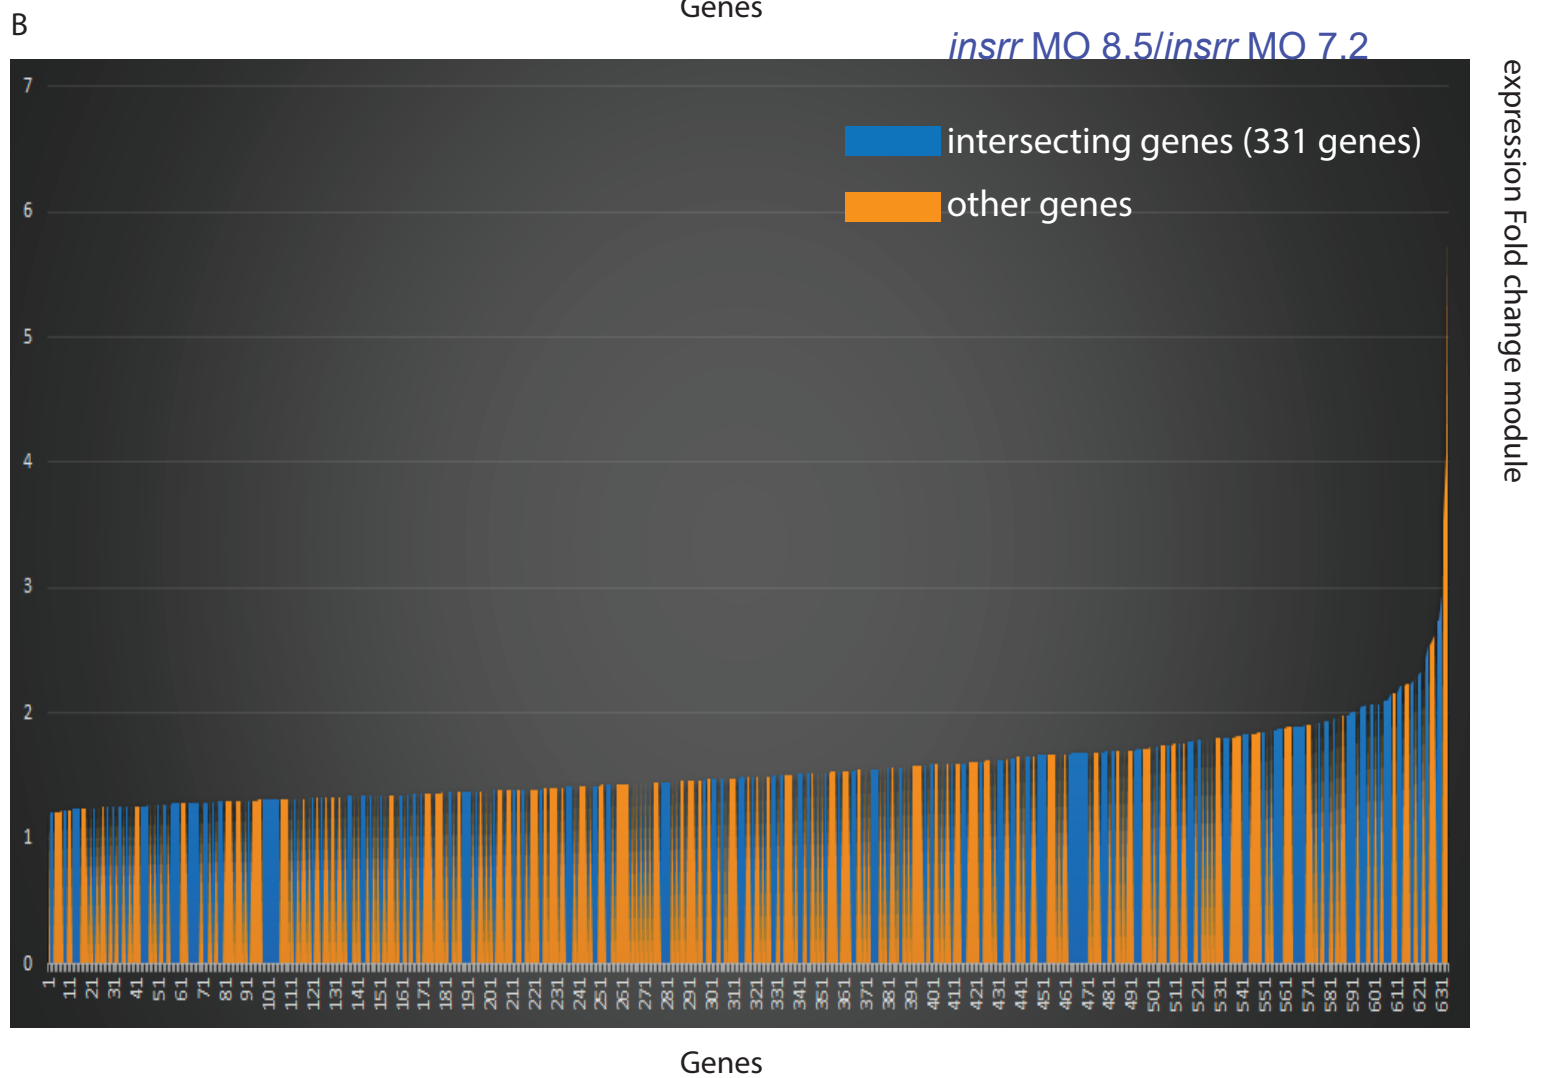



**Supplementary table S1.** Temporal expression profiles of 30 selected DEGs from Xenbase online database (<https://www.xenbase.org>)

| Genes upregulated in embryos injected with <i>insrr</i> MO1 at the middle neurula stage (marked by vertical red line) |                                                                         |                             |
|-----------------------------------------------------------------------------------------------------------------------|-------------------------------------------------------------------------|-----------------------------|
| Gene                                                                                                                  | Expression fold change: <i>insrr</i> MO1/<br><i>control</i> MO injected | Temporal expression pattern |
| <i>larp6-like.1.S</i>                                                                                                 | 3,70                                                                    |                             |
| <i>fitm2.L</i>                                                                                                        | 2,78                                                                    |                             |
| <i>frzb.S</i>                                                                                                         | 2,70                                                                    |                             |

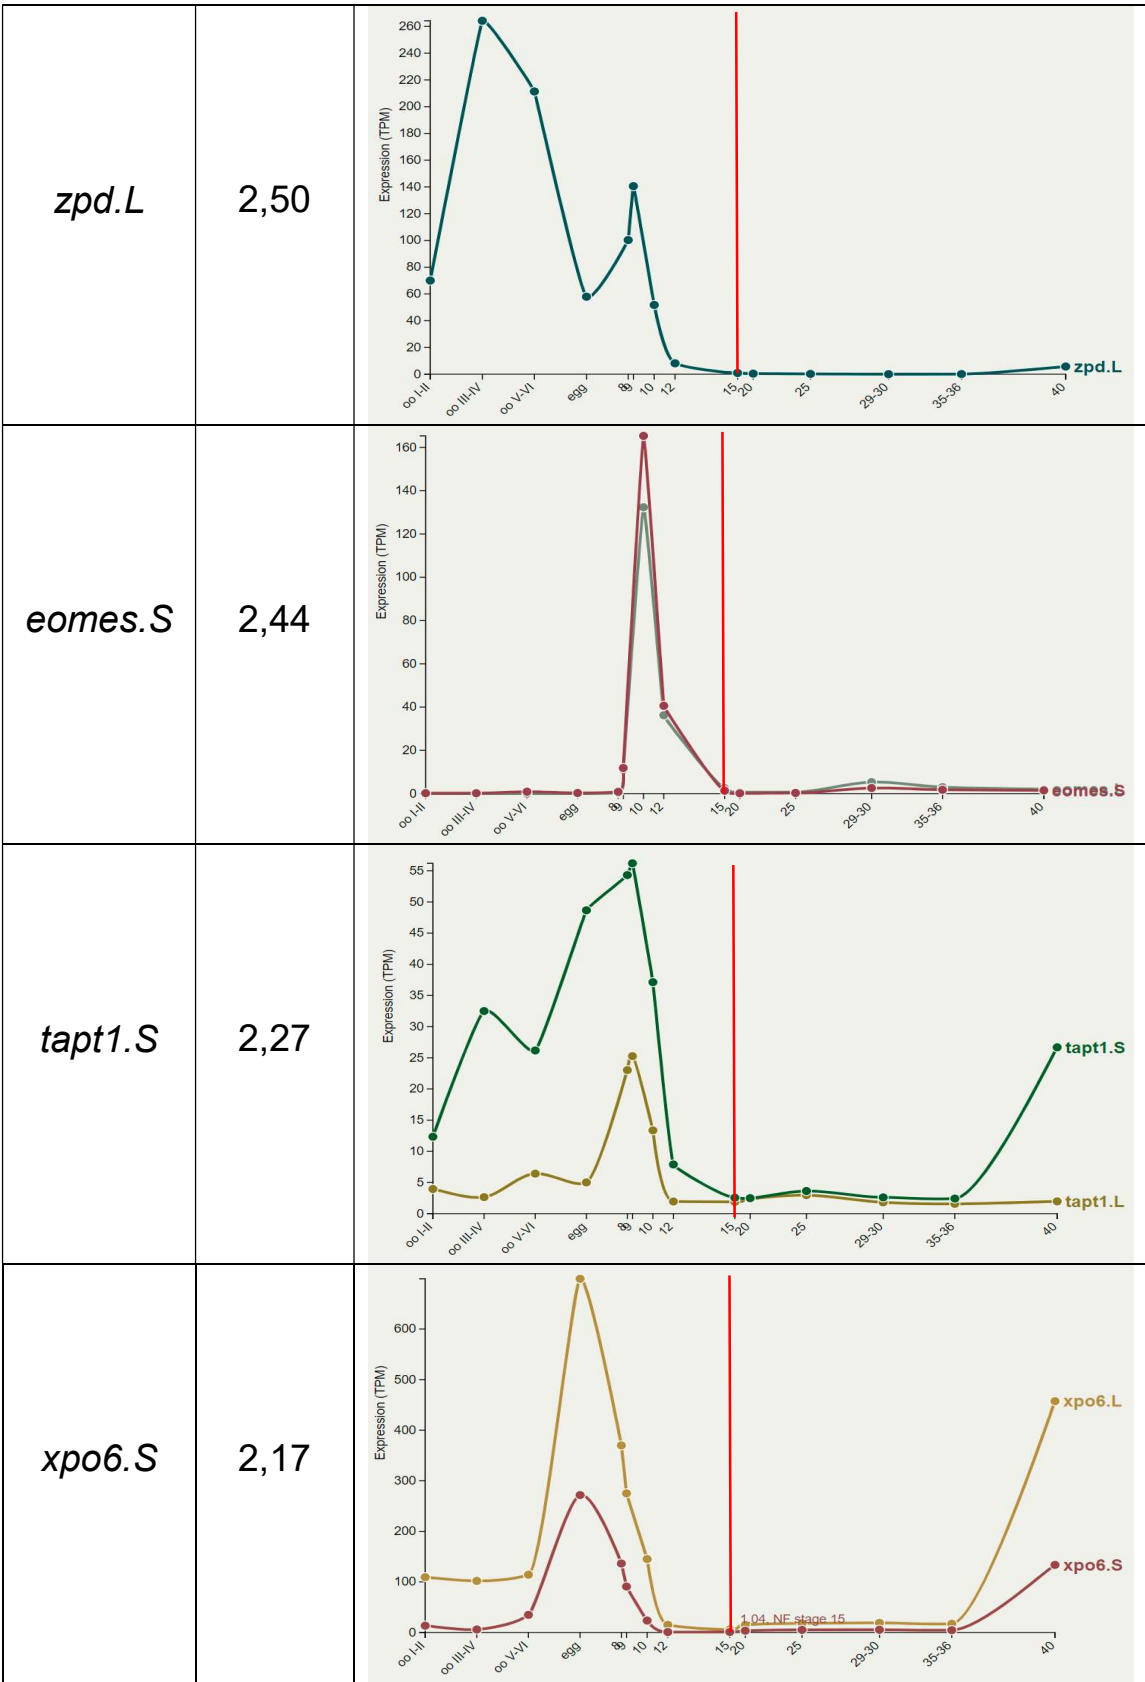



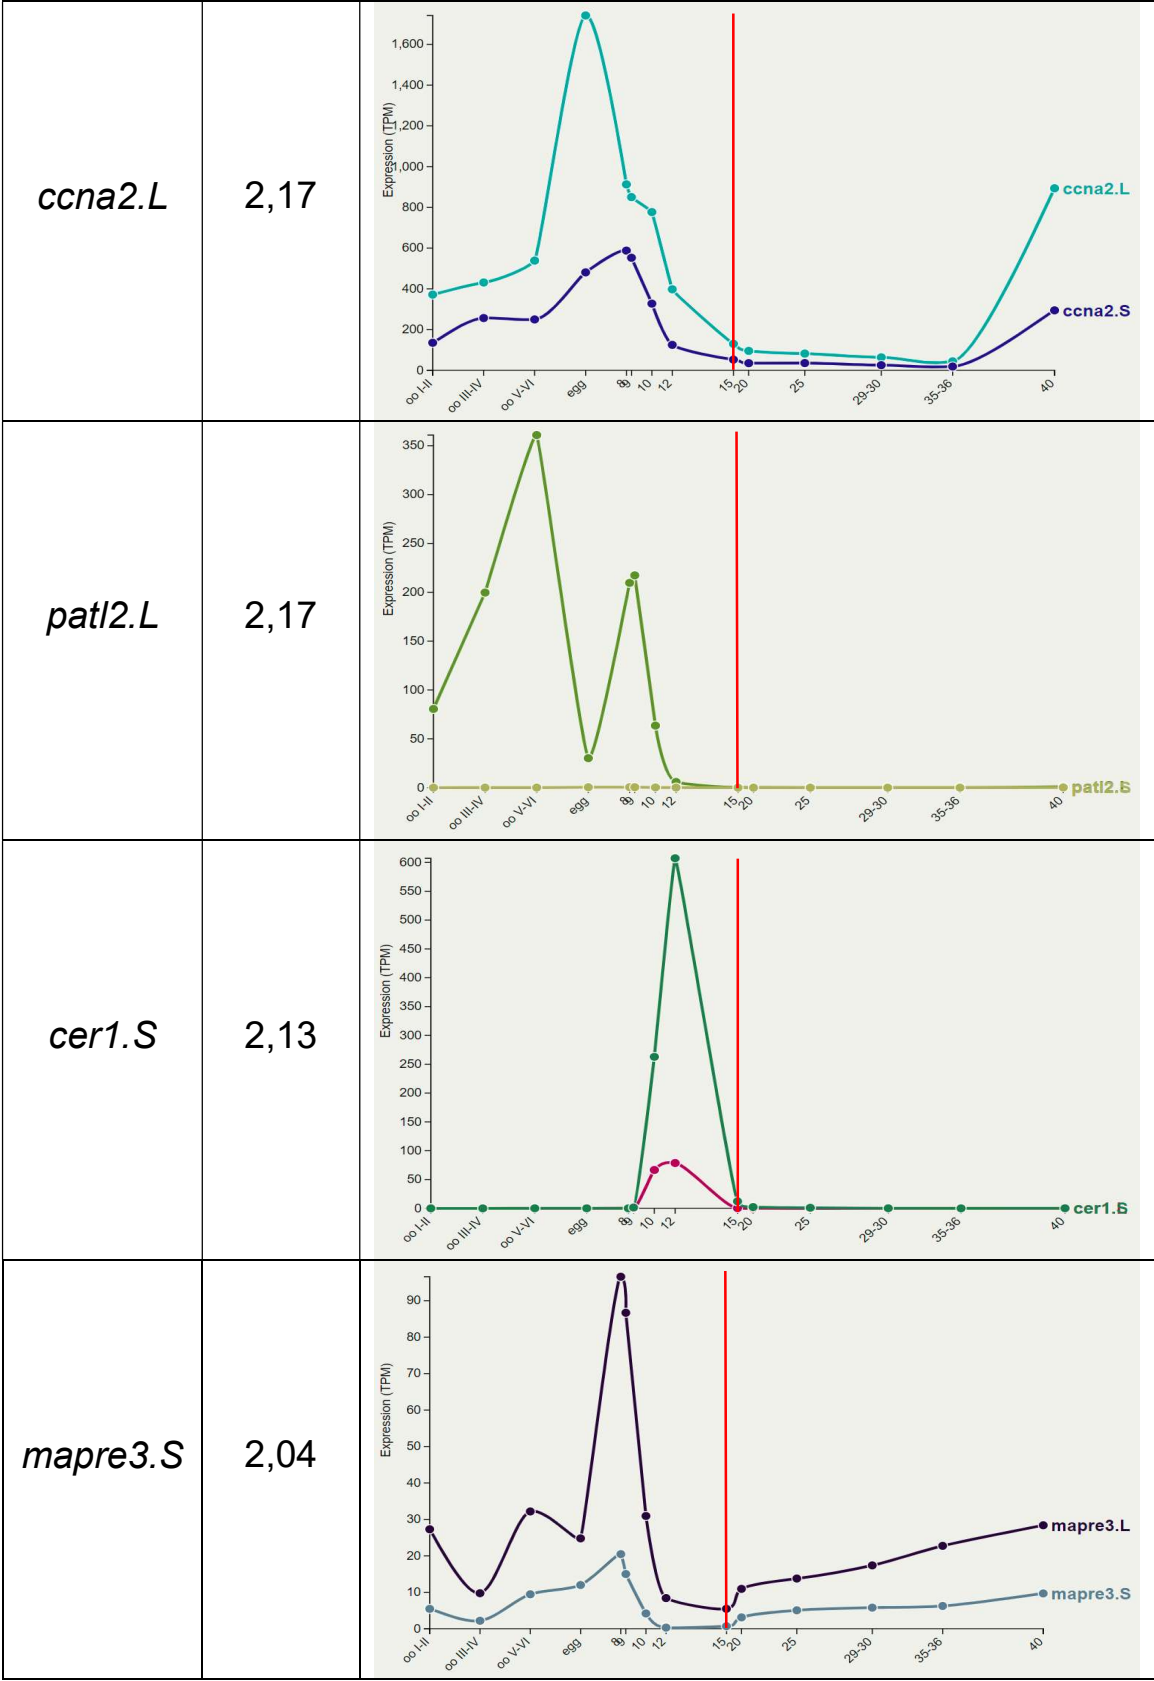

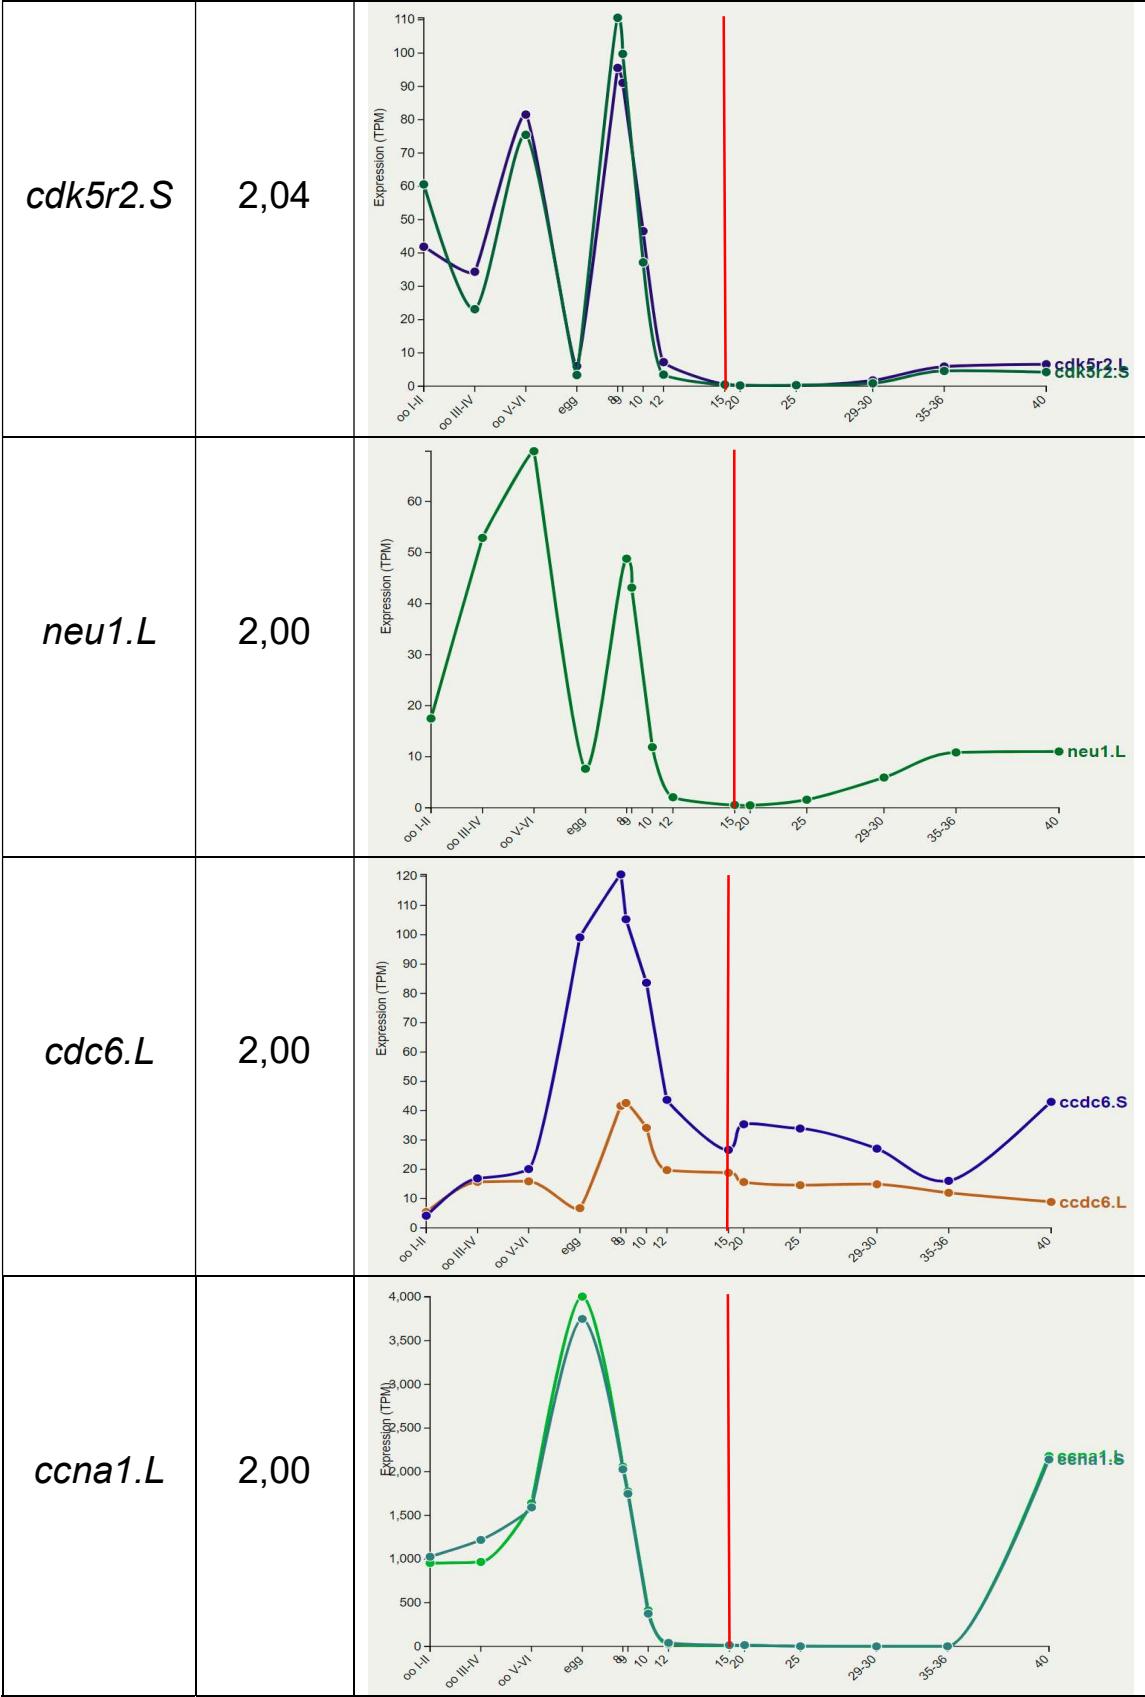

**Genes downregulated in embryos injected with *insrr* MO1 at the middle neurula stage (marked by vertical red line)**

| Gene           | Expession fold change: <i>insrr</i> MO1/<br><i>control</i> MO injected | Temporal expression pattern |
|----------------|------------------------------------------------------------------------|-----------------------------|
| <i>mylfp.L</i> | 0,15                                                                   |                             |
| <i>act3.L</i>  | 0,15                                                                   |                             |
| <i>act2.L</i>  | 0,15                                                                   |                             |

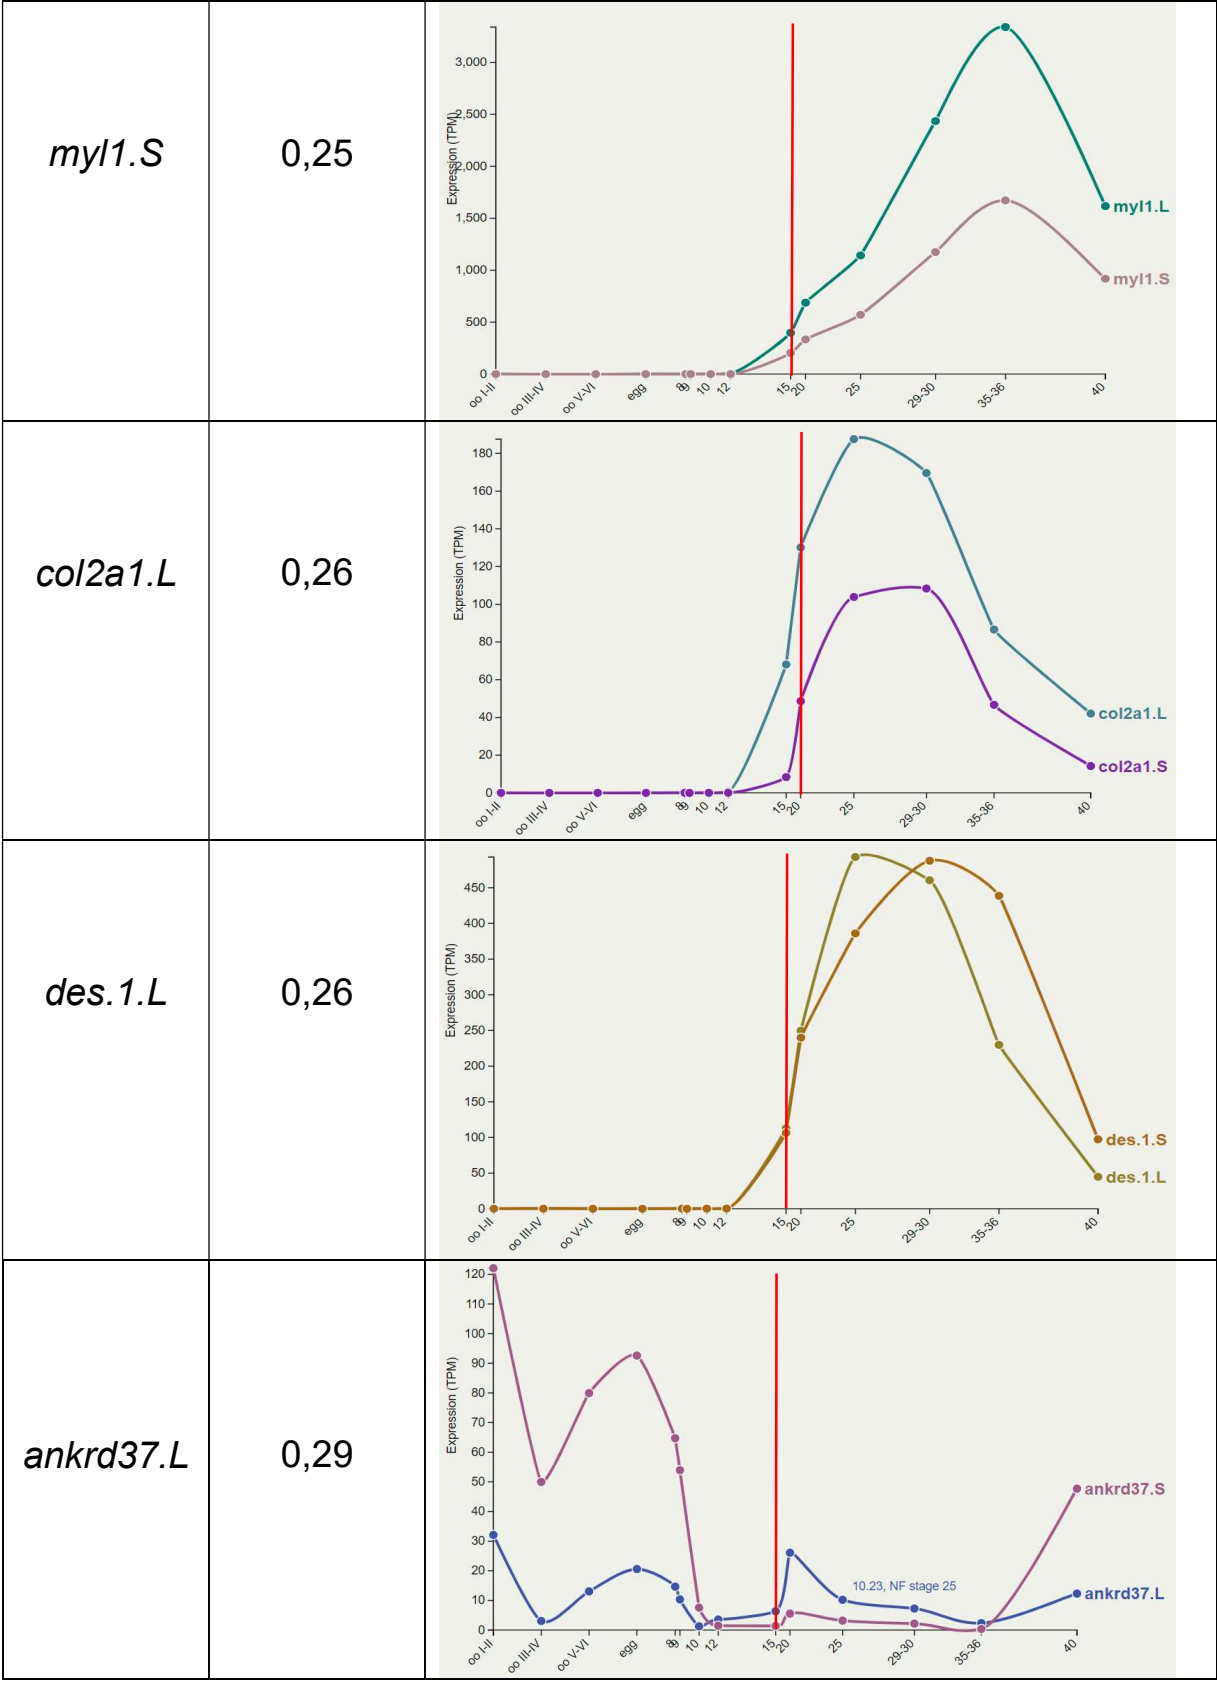

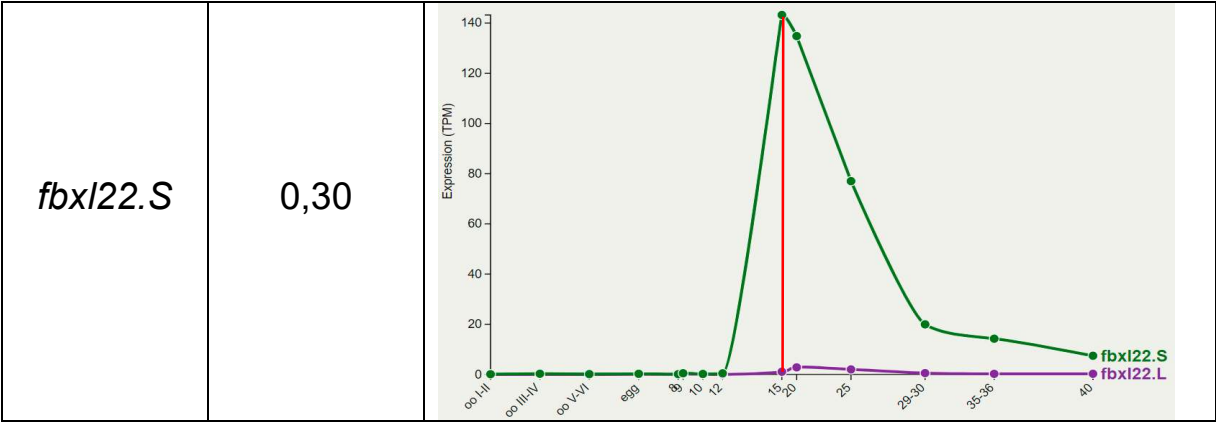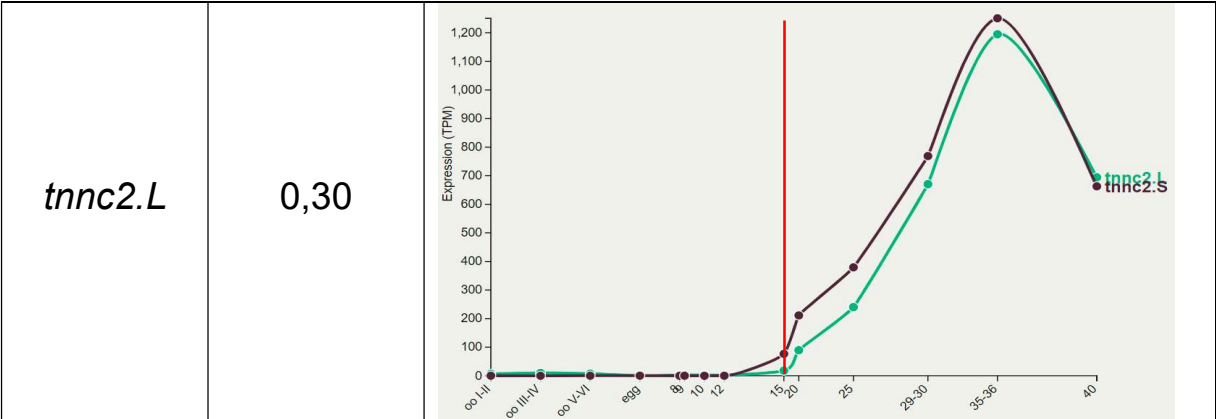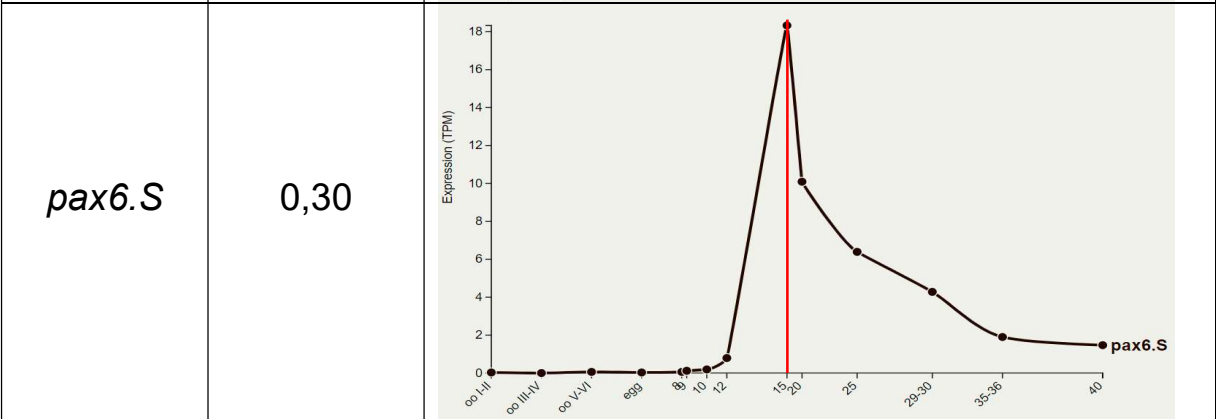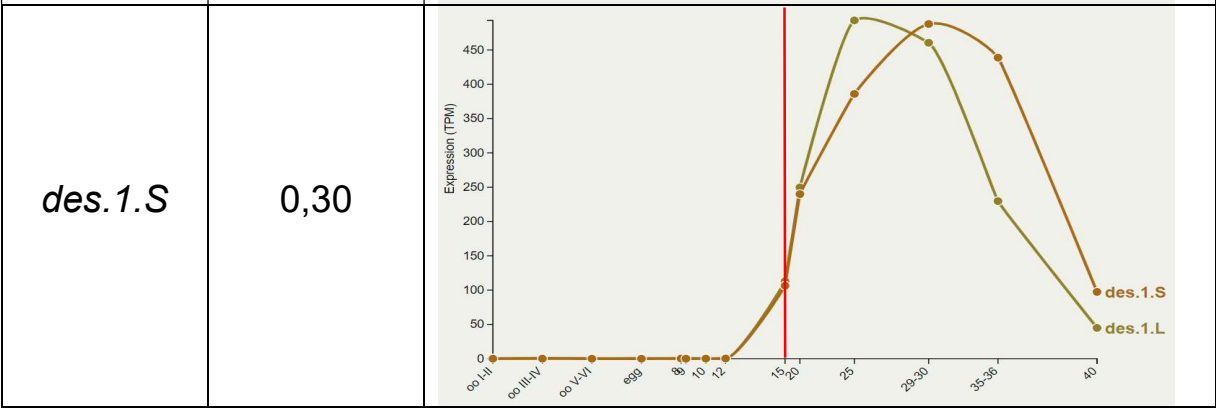

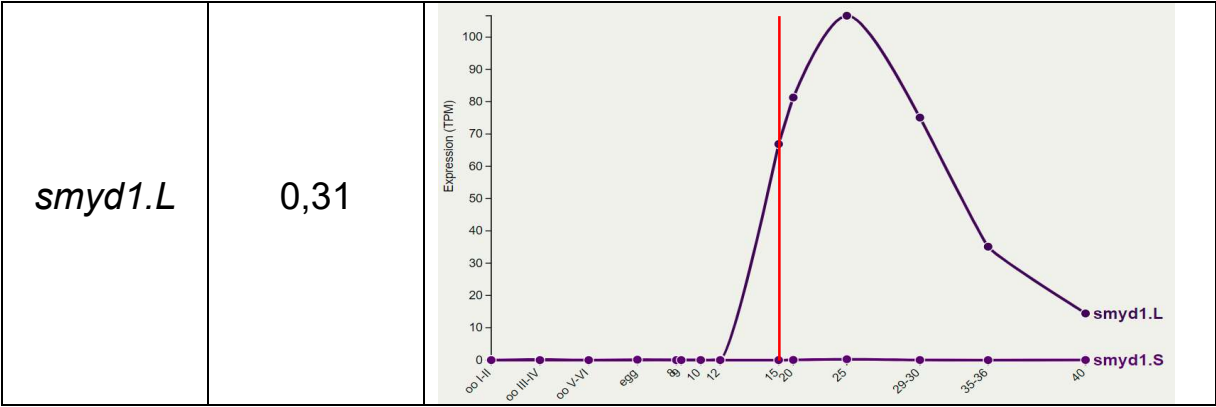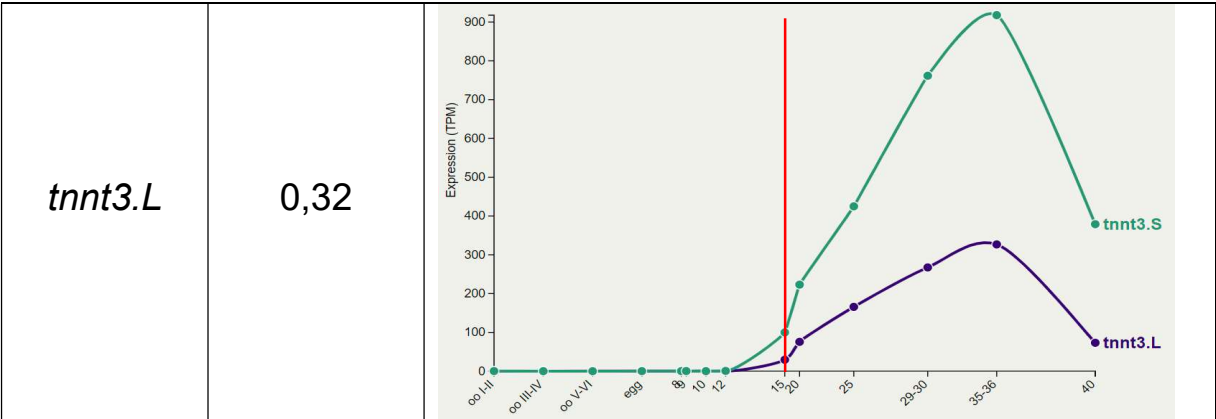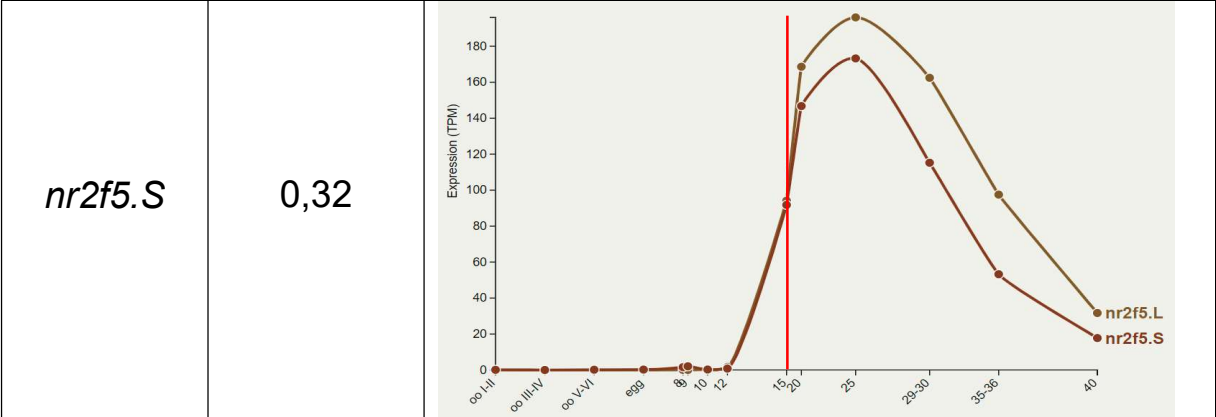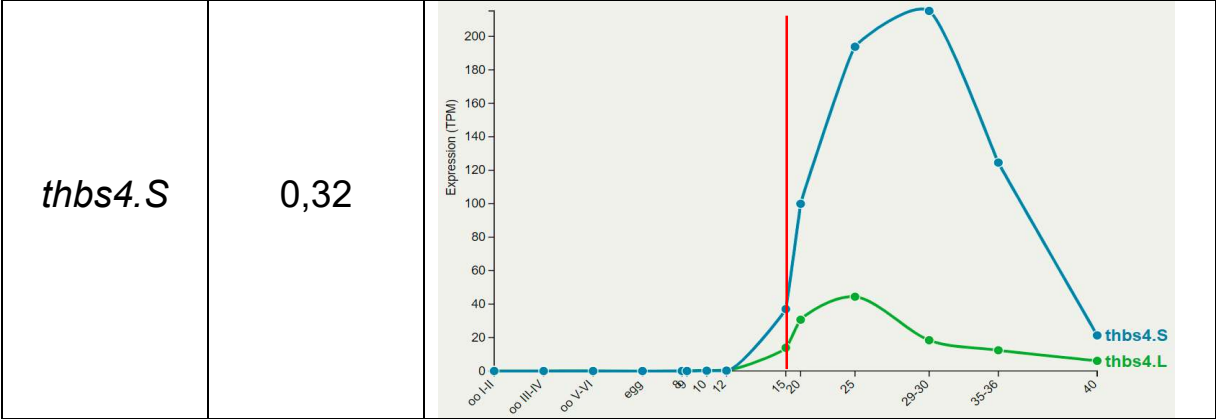

Supplement: s1 [file s1]
