# Supplementary material for: Insulin Receptor-Related Receptor Regulates the Rate of Early Development in Xenopus laevis
Source: Int J Mol Sci. 2022 Aug 17;23(16):9250. doi: 10.3390/ijms23169250 (PMC9409083; doi:10.3390/ijms23169250)
Supplement: Supplementary file 1 [file ijms-23-09250-s001.zip]

Archive with 7 entries (7 files):
- description of  supplement figures, files and table.pdf
- Supplement Figures and Table.pdf
- supplement file S1.xlsx
- supplement file S2.xlsx
- supplement file S3.xlsx
- supplement file S4.xlsx
- supplement file S5.xlsx
