# Supplementary material for: Insulin Receptor-Related Receptor Regulates the Rate of Early Development in Xenopus laevis
Source: Int J Mol Sci. 2022 Aug 17;23(16):9250. doi: 10.3390/ijms23169250 (PMC9409083; doi:10.3390/ijms23169250)
Supplement: Supplementary file 1 [file ijms-23-09250-s001.zip › supplement file S1.xlsx]

## Sheet: insrr MO 8.5 vs insrr MO 7.2
pos	id	symb	baseMean	insrr MO pH 7.2			insrr MO pH 8.5			log2FoldChange	lfcSE	stat	pvalue	padj
				Dv1	Dv2	Dv3	Dv4	Dv5	Dv6
chr4S:42470316-42503165	NM_001088070	hnf4b.S	72.2762	147.92	78.2818	207.456	0	0	0	-2.57599	0.211812	-12.1617	4.97293e-34	4.38066e-30
chr8S:42895593-42948465	NM_001097920	ptgs1.S	64.0926	175.71	65.8713	125.029	4.6385	7.92849	5.37755	-2.02397	0.211415	-9.57346	1.03391e-21	4.55385e-18
chr6S:39829548-39835247	NM_001094778	eomes.S	389.022	555.819	791.41	449.179	175.103	187.311	175.308	-1.45555	0.156238	-9.31624	1.20539e-20	3.53943e-17
chr9_10S:64688934-64702275	NM_001096446	frzb.S	456.598	746.77	572.794	730.726	164.667	267.587	257.047	-1.34477	0.148324	-9.06646	1.22948e-19	2.70762e-16
chr7L:125082407-125092161	NM_001088993	rdd2.L	599.079	355.903	295.943	354.712	658.667	936.553	992.695	1.20084	0.137202	8.75232	2.09006e-18	3.68228e-15
chr1L:202553541-202568813	NM_001094584	ugt3a2.L	38.2816	116.543	36.2769	76.8698	0	0	0	-1.82277	0.209942	-8.68227	3.87963e-18	5.69595e-15
chr9_10S:22826984-22828767	NM_001172163	actg1.S	7361.83	9022.2	9976.16	10299.6	5941.92	4593.57	4337.53	-0.912364	0.10639	-8.57561	9.85606e-18	1.24032e-14
chr6L:144041205-144047930	NM_001101761	42sp50.L	254.284	467.964	295.943	396.389	102.047	127.847	135.514	-1.37046	0.161346	-8.49394	1.99744e-17	2.19943e-14
chr9_10S:101583694-101588547	NM_001090540	mylpf.L	98.2788	44.8241	27.685	30.5627	202.934	154.606	129.061	1.55961	0.193129	8.07545	6.72279e-16	6.58011e-13
chr6L:155006766-155008380	NM_001127726	LOC100158267.L	1081.48	546.854	801.911	664.044	1738.28	1305.23	1432.58	1.03507	0.128503	8.05484	7.95848e-16	7.01063e-13
chr9_10L:76835674-76851617	NM_001092232	dbr1.L	1641.34	2263.62	1985.69	2011.58	1167.74	1141.7	1277.7	-0.761131	0.0950786	-8.00528	1.19192e-15	9.54513e-13
chr7L:113926953-114014652	NM_001097040	gbp1.L	271.979	550.44	300.717	391.758	127.559	112.981	148.42	-1.34554	0.168435	-7.98848	1.36615e-15	1.00287e-12
chr4S:9841040-9872851	NM_001172195	pax6.S	221.91	94.1306	103.103	138.921	401.23	298.309	295.765	1.28279	0.162593	7.88957	3.0322e-15	2.05467e-12
chr2L:87381090-87402954	NM_001091098	ldlrap1.S	1042.71	1561.67	1258.24	1265.11	708.531	719.511	743.177	-0.848772	0.107754	-7.87694	3.35488e-15	2.11094e-12
chr6L:6496802-6504577	NM_001092867	higd1a.L	259.786	163.16	153.7	152.813	369.92	370.657	348.465	1.07037	0.136489	7.84216	4.42867e-15	2.60081e-12
chr8L:2137846-2142058	NM_001086363	pou5f3.2.L	5038.23	5603.01	8430.57	6449.65	2937.33	2994	3814.83	-0.970587	0.123893	-7.83404	4.72428e-15	2.60101e-12
chr2S:28713218-28729198	NM_001087963	xfrp	2234.57	1396.72	1484.49	1754.11	3349	2835.43	2587.68	0.853875	0.109624	7.78914	6.74679e-15	3.30568e-12
chr1L:146374384-146395539	NM_001091149	gltp.L	463.893	722.565	554.655	619.589	303.822	305.247	277.481	-0.988422	0.1269	-7.78899	6.75472e-15	3.30568e-12
chr4L:132018523-132039114	NM_001090521	impdh2.L	3341.37	2241.21	2710.27	2534.85	4270.9	4368.6	3922.38	0.709522	0.0925288	7.66812	1.74534e-14	8.09196e-12
chr7S:86814842-86837773	NM_001096843	MGC154351	657.951	391.763	406.684	438.991	1124.84	831.5	753.932	1.00744	0.131935	7.63594	2.24184e-14	9.87419e-12
chr7L:59508989-59542302	NM_001094810	plod1.L	259.493	156.884	147.972	167.632	340.93	361.737	381.806	1.0538	0.138151	7.62789	2.38632e-14	1.001e-11
chr5L:17331483-17334323	NM_001088291	mixer.L	509.092	729.736	946.064	519.566	281.789	279.479	297.916	-1.14977	0.151404	-7.59405	3.1006e-14	1.24151e-11
chr2S:118170900-118180240	NM_001087340	kansl2.S	998.054	590.782	724.584	766.845	1238.48	1409.29	1258.35	0.840243	0.111748	7.5191	5.51543e-14	2.11241e-11
chr4L:13320508-13343672	NM_001085944	pax6.L	471.698	243.843	171.838	361.195	700.413	720.502	632.399	1.16094	0.159826	7.26378	3.76418e-13	1.38161e-10
chr4S:98512839-98533969	NM_001088208	mst1.S	785.578	1168.12	911.697	978.932	572.855	531.209	550.661	-0.818201	0.113562	-7.20486	5.81035e-13	2.04733e-10
chr9_10L:21282884-21287241	NM_001096383	actg1.L	10219.3	11414.9	13173.3	12849.3	8489.61	8036.52	7352.18	-0.619943	0.0874857	-7.08622	1.37824e-12	4.66957e-10
chr6L:8349238-8398360	NM_001089019	vill.L	374.99	176.607	200.478	297.292	548.503	505.441	521.622	1.04648	0.149305	7.00904	2.39963e-12	7.82901e-10
chr2L:153732765-153739243	NM_001096223	stoml3.L	42.7568	10.7578	11.4559	13.8921	76.5352	78.2938	65.6061	1.45177	0.209344	6.93485	4.06662e-12	1.27939e-09
chr7S:85577980-85591664	NM_001114834	fblim1.S	1159.89	852.554	752.269	946.517	1575.93	1460.82	1371.27	0.735506	0.106185	6.92667	4.30857e-12	1.30877e-09
chr7L:111370927-111396614	NM_001087148	emp3.L	168.088	99.5095	72.5539	110.211	243.521	241.819	240.914	1.11459	0.163185	6.83018	8.48075e-12	2.49023e-09
chr3L:75296291-75303214	NM_001088106	tuba3d	515.507	867.795	625.3	601.992	302.662	372.639	322.653	-0.939138	0.138521	-6.77974	1.20395e-11	3.34699e-09
chr1S:101038766-101042552	NM_001088331	cer1.S	1030.1	1506.99	1499.77	1103.03	663.305	584.726	822.765	-0.884553	0.130498	-6.77832	1.21584e-11	3.34699e-09
chr7L:108277337-108329640	NM_001089059	otog.L	20734.7	14241.5	11988.6	18492.3	25816.7	25801.3	28067.6	0.766863	0.114945	6.67154	2.53136e-11	6.75721e-09
chr7S:79991413-79995883	NM_001097113	LOC100036823	23.6359	2.68945	0.954656	2.77843	49.8639	56.4905	29.0387	1.38556	0.208202	6.6549	2.83488e-11	7.34485e-09
chr2S:60294881-60311313	NM_001086042	arg2.S	193.269	221.431	352.268	265.803	96.2489	99.1061	124.759	-1.11347	0.16881	-6.59599	4.22427e-11	1.06319e-08
chr1S:118785762-118787532	NM_001096757	act2	160.283	94.1306	64.9166	75.0175	337.451	179.382	210.8	1.21508	0.184395	6.58955	4.41167e-11	1.07951e-08
chr1S:126232104-126245247	NM_001088202	vegt.S	2628.02	2785.37	4245.36	3157.22	1822.93	1736.34	2020.88	-0.790465	0.121275	-6.51794	7.12809e-11	1.6524e-08
chr2L:142132028-142168171	NM_001094217	dctn2.L	471.754	636.502	629.119	552.907	344.409	319.122	348.465	-0.7738	0.118667	-6.52074	6.99624e-11	1.6524e-08
chr1L:167731803-167786181	NM_001087560	aifm3.L	318.54	155.988	189.977	217.643	569.376	332.997	445.261	1.03844	0.160387	6.47459	9.50691e-11	2.14734e-08
chr5L:147049462-147145551	NM_001092963	cd2ap.L	628.711	850.761	756.088	767.772	444.136	459.852	493.659	-0.709207	0.110004	-6.44708	1.14023e-10	2.51106e-08
chr7S:4583497-4606472	NM_001087217	gnb3.S	837.662	565.68	582.34	717.76	1030.91	1037.64	1091.64	0.704152	0.110973	6.34524	2.22077e-10	4.7316e-08
chr6L:45203388-46155441	NM_001088341	eomes.L	630.435	900.068	985.205	626.998	451.094	407.326	411.92	-0.867974	0.136844	-6.34282	2.25595e-10	4.7316e-08
chr9_10L:18543500-18548958	NM_001094472	tcf15.L	136.093	90.5447	79.2365	62.0515	194.817	195.239	194.667	1.06566	0.169611	6.28296	3.32189e-10	6.80525e-08
chr6S:109172791-109180567	NM_001095871	klf10.S	607.78	745.873	764.68	758.51	434.859	459.852	482.904	-0.669799	0.107484	-6.2316	4.617e-10	9.24344e-08
chr8L:21374993-21384512	NM_001086874	p2ry4.L	180.944	129.093	89.7377	106.506	285.268	230.917	244.141	1.00573	0.161581	6.22429	4.83749e-10	9.46965e-08
chr8L:89498782-89503705	NM_001086591	actc1.L	981.174	822.971	557.519	639.964	1539.98	1220.99	1105.62	0.830598	0.133805	6.20752	5.38275e-10	1.0308e-07
chr4L:127056623-127149382	NM_001097913	grip2.L	212.205	319.148	250.12	333.411	92.77	160.552	117.231	-1.03188	0.167308	-6.16757	6.93476e-10	1.29975e-07
chr7S:22708526-22752127	NM_001093269	herc4.S	331.656	554.026	345.586	450.105	219.169	221.007	200.045	-0.918159	0.150139	-6.11539	9.63236e-10	1.76774e-07
chr9_10L:42996345-43006248	NM_001086838	slc16a6.L	465.707	439.276	691.171	765.919	301.502	309.211	287.161	-0.917979	0.150727	-6.09035	1.12667e-09	2.02548e-07
chr1S:133798325-133815288	NM_001127828	kmt5a.S	4281.46	5687.28	4631.04	5177.13	3390.74	3168.42	3634.15	-0.572921	0.094297	-6.07571	1.23442e-09	2.17481e-07
chr1S:96463626-96468175	NM_001094486	plin2.S	1792.09	2297.68	2949.89	1735.59	1240.8	1173.42	1355.14	-0.79286	0.132047	-6.00436	1.92089e-09	3.26371e-07
chr6S:31639200-31676516	NM_001096963	cdca7l.L	1084.11	1856.61	1020.53	1441.08	664.465	768.073	753.932	-0.854711	0.14236	-6.00388	1.92659e-09	3.26371e-07
chr2L:17309142-17318140	NM_001095158	adamts1.L	534.885	654.432	807.639	598.288	358.324	402.371	388.259	-0.75842	0.126467	-5.99699	2.01009e-09	3.34093e-07
chr7L:119426581-119440568	NM_001086649	mfap2.L	228.122	129.99	129.833	167.632	327.014	250.739	363.522	0.946705	0.158316	5.97986	2.23325e-09	3.64309e-07
chr1L:37356773-37383046	NM_001092857	pdlim3.S	25.3282	73.5115	21.0024	50.0117	1.15962	1.98212	4.30204	-1.22621	0.205163	-5.97673	2.2766e-09	3.64628e-07
chr9_10L:70728435-70740285	NM_001090261	frzb-1	1029.8	1553.6	1193.32	1141.93	797.822	777.983	714.138	-0.700256	0.117628	-5.95316	2.63021e-09	4.13742e-07
chr1S:9128458-9131318	NM_001088148	foxi4.2.L	1191.82	1169.91	1628.64	1783.75	775.789	896.91	895.899	-0.751528	0.126904	-5.92202	3.18013e-09	4.9147e-07
chr1L:9292212-9321343	NM_001091994	smyd1.L	96.5031	66.3397	37.2316	36.1195	170.465	151.632	117.231	1.14538	0.194663	5.8839	4.00704e-09	6.08587e-07
chr9_10S:75515095-75532388	NM_001093357	slc40a1.S	20.6462	52.8924	23.8664	40.7502	1.15962	1.98212	3.22653	-1.19686	0.205097	-5.83558	5.36042e-09	8.00338e-07
chr7L:19876294-19887611	NM_001085816	mmp21.L	255.883	132.679	122.196	201.899	434.859	372.639	271.028	0.988889	0.169992	5.81726	5.98207e-09	8.78267e-07
chr9_10L:110239368-110242685	NM_001087413	rps2.L	5455.22	4607.92	4189.03	4781.67	6201.67	6490.46	6460.58	0.476888	0.0820999	5.80863	6.29873e-09	9.09598e-07
chr5L:71858295-71863415	NM_001090340	sgk1.L	2263.94	2309.34	3269.7	2888.64	1850.76	1502.45	1762.76	-0.668086	0.115963	-5.76121	8.35135e-09	1.18656e-06
chr9_10L:1247793-1251407	NM_001086376	xk81a1.L	12077.9	9006.96	6380.92	10994.2	14692.4	15290.1	16102.5	0.725614	0.126325	5.74403	9.2449e-09	1.29267e-06
chr4L:16113649-16135842	NM_001127811	tnnt3.L	50.852	17.0332	23.8664	23.1535	84.6526	70.3654	86.0407	1.1777	0.205259	5.73761	9.60222e-09	1.32166e-06
chr5L:43212643-43227799	NM_001086410	MGC69098	301.163	454.516	365.633	376.014	190.178	175.418	245.216	-0.836801	0.146142	-5.72594	1.02862e-08	1.39402e-06
chr2L:38011661-38039614	NM_001092345	asmtl.L	612.678	948.478	716.947	688.123	393.113	477.692	451.714	-0.743679	0.129966	-5.72212	1.05203e-08	1.40415e-06
chr4L:94652154-94733695	NM_001091730	bcar3.L	353.719	255.497	213.843	285.252	432.54	485.62	449.563	0.762693	0.133363	5.71892	1.072e-08	1.40945e-06
chr4L:92108068-92133556	NM_001087189	palmd.L	26.5219	5.37889	7.63725	7.40913	42.9061	49.5531	46.2469	1.21082	0.211883	5.71456	1.09986e-08	1.4248e-06
chr1L:143561452-143578113	NM_001092995	MGC107841.L	115.133	333.491	104.058	211.16	11.5962	20.8123	9.67958	-1.15874	0.202918	-5.71038	1.12721e-08	1.43908e-06
chr5L:49630351-49639077	NM_001095603	LOC733172	17.1376	43.0311	15.2745	43.5287	0	0.991061	0	-1.11416	0.196451	-5.67143	1.4161e-08	1.78206e-06
chr9_10L:29303117-29358683	NM_001090779	brca1.L	685.028	842.693	938.427	753.879	517.193	521.298	536.679	-0.634433	0.112072	-5.66097	1.50524e-08	1.84733e-06
chr8L:53174875-53178943	NM_001094280	ddah2.L	460.126	676.844	504.059	595.509	331.653	367.684	285.01	-0.756252	0.133603	-5.66043	1.50991e-08	1.84733e-06
chr1L:152585845-152598896	NM_001088196	vegt.L	2835.17	3264.09	4465.88	2927.53	2004.99	2092.13	2256.42	-0.680154	0.120416	-5.64837	1.61973e-08	1.95455e-06
chr7L:5700179-5746054	NM_001091371	ovos2.L	342.617	597.057	336.039	472.332	226.127	247.765	176.384	-0.914344	0.161976	-5.64492	1.65257e-08	1.96723e-06
chr5L:17316511-17318601	NM_001087625	mixl1.L	192.964	179.296	412.412	250.984	114.803	98.1151	102.173	-1.04734	0.186044	-5.62954	1.80696e-08	2.09441e-06
chr8L:21892679-21902981	NM_001101749	gjb1.L	7625.14	6771.13	5045.36	6029.18	10498.1	8861.08	8546	0.601025	0.106751	5.63017	1.80031e-08	2.09441e-06
chr2S:158712706-158719718	NM_001105267	sfrpx.S	172.329	217.845	260.621	219.496	118.282	108.026	109.702	-0.881641	0.15697	-5.61662	1.9473e-08	2.22777e-06
chr1L:144254967-144256737	NM_001086195	MGC53823	223.862	160.47	119.332	111.137	432.54	300.292	219.404	0.990966	0.177432	5.58506	2.33623e-08	2.63844e-06
chr5L:151970305-152149596	NM_001086795	msra.1.L	72.7833	147.92	63.962	132.438	25.5117	35.6782	31.1898	-1.15053	0.206213	-5.57935	2.4142e-08	2.69198e-06
chr7L:113248179-113250822	NM_001114803	cdknx.L	1947.62	1679.11	1385.21	1567.03	2589.44	2114.92	2349.99	0.568846	0.10236	5.55728	2.74004e-08	3.01712e-06
chr2L:145563098-145610960	NM_001087789	col2a1.L	165.363	121.922	62.0527	80.5743	329.333	222.989	175.308	1.05192	0.18952	5.55046	2.84912e-08	3.0985e-06
chr4S:13920643-13932702	NM_001087887	mdk.S	1412.1	1083.85	1140.81	1189.17	1843.8	1574.8	1640.15	0.535854	0.0966174	5.54615	2.92034e-08	3.13723e-06
chr3L:31206482-31235446	NM_001090799	kif3a.L	288.902	455.413	301.671	391.758	211.052	198.212	175.308	-0.830918	0.150752	-5.51182	3.55133e-08	3.76912e-06
chr9_10L:91447316-91461801	NM_001088345	nde1.L	278.803	422.243	405.729	282.473	184.38	196.23	181.761	-0.833763	0.151388	-5.50746	3.6404e-08	3.81766e-06
chr1L:7336015-7338331	NM_001099892	LOC100490368.L	19.9601	8.96482	50.5968	60.1992	0	0	0	-1.05497	0.191643	-5.50487	3.69446e-08	3.82876e-06
chr2L:88522686-88582894	NM_001093522	vav1.L	30.5342	83.3728	48.6875	29.6365	6.95775	5.94637	8.60407	-1.15389	0.210593	-5.47922	4.27208e-08	4.37591e-06
chr2L:32984907-33014821	NM_001094032	traf4.L	118.721	116.543	239.619	167.632	70.7371	56.4905	61.304	-1.04734	0.191772	-5.46137	4.7247e-08	4.78389e-06
chr1L:100259877-100272756	NM_001092549	csnk1g2.L	560.707	667.879	814.322	625.146	402.39	397.416	457.091	-0.675138	0.123879	-5.44996	5.038e-08	5.04315e-06
chr9_10L:70732848-70740561	NM_001096784	frzb	635.217	930.548	769.453	707.572	492.841	518.325	392.561	-0.698737	0.128471	-5.43885	5.36246e-08	5.30763e-06
chr8L:38387866-38401201	NM_001093459	pgk1.L	280.015	397.142	368.497	318.593	192.498	214.069	189.29	-0.756405	0.139334	-5.42872	5.67584e-08	5.55539e-06
chr9_10L:1012368-1016223	NM_001087241	krt.L	11660.2	9150.39	7571.38	10790.5	13077.1	14092.9	15278.7	0.581943	0.108158	5.38047	7.42905e-08	7.19148e-06
chr1L:36928032-36947419	NM_001097752	LOC100036997	17.1613	46.6171	13.3652	40.7502	1.15962	0	1.07551	-1.05097	0.195487	-5.37615	7.60955e-08	7.28614e-06
chr7L:59981702-59987626	NM_001086163	hspa8.L	54853.4	45985.9	41678.4	50011.7	65044.5	65698.4	60701.7	0.455768	0.0849219	5.36691	8.00988e-08	7.42726e-06
chr3S:7210433-7224356	NM_001095070	tmem263.S	1841.08	1447.82	1322.2	1616.12	2155.74	2494.5	2010.13	0.563447	0.104914	5.37057	7.8489e-08	7.42726e-06
chr7L:59981701-59987629	NM_001172185	hsc70.ii	54851.8	45981.5	41676.5	50009.8	65041	65700.4	60701.7	0.455839	0.0849225	5.36771	7.97432e-08	7.42726e-06
chr9_10S:32684577-32696534	NM_001095598	slc9a3r1.S	583.673	778.146	655.849	705.72	452.254	464.808	445.261	-0.601827	0.112546	-5.34738	8.92364e-08	8.18837e-06
chr2L:162879741-162898738	NM_001093594	mmp3.L	63.2515	25.998	12.4105	42.6025	93.9296	110.999	93.5693	1.10861	0.207956	5.33095	9.76982e-08	8.87241e-06
chr8L:38281112-38305623	NM_001093579	sept6.L	171.021	229.499	205.251	269.507	78.8545	126.856	116.155	-0.900337	0.16934	-5.31673	1.05647e-07	9.40046e-06
chr5S:6707653-6741800	NM_001099913	LOC100101336	1025.39	1444.23	1051.08	1278.08	776.949	763.117	838.897	-0.61256	0.115188	-5.31792	1.04959e-07	9.40046e-06
chr9_10S:17247872-17249536	NM_001087305	socs3.S	183.506	101.302	120.287	90.7619	150.751	338.943	298.992	0.988673	0.186173	5.31051	1.09319e-07	9.62988e-06
chr5L:17168200-17171283	NM_001085745	lefty.L	241.034	303.907	325.538	304.701	193.657	163.525	154.873	-0.755522	0.142833	-5.28957	1.22608e-07	1.06936e-05
chr3S:11362672-11382502	NM_001086121	sparc.S	367.416	173.021	286.397	278.769	510.235	555.985	400.089	0.829103	0.156898	5.28433	1.26165e-07	1.0896e-05
chr2L:161589699-161605145	NM_001127749	ska3.L	416.762	569.266	534.608	460.292	289.906	314.166	332.332	-0.666855	0.126352	-5.27775	1.30778e-07	1.11847e-05
chr3L:106974792-107060155	NM_001092998	pcsk6.L	164.621	264.462	225.299	180.598	103.207	111.99	102.173	-0.874451	0.165768	-5.27515	1.32645e-07	1.12353e-05
chr1L:9452210-9455277	NM_001088150	foxi4.2.S	554.172	534.303	792.365	844.641	402.39	308.22	443.11	-0.781489	0.14891	-5.24807	1.537e-07	1.28947e-05
chr9_10L:20549272-20552458	NM_001093847	rpl38.L	1416.04	1152.88	1103.58	1240.1	1575.93	1724.45	1699.3	0.489801	0.0933898	5.24469	1.56545e-07	1.30094e-05
chr1L:199768086-199842767	NM_001089771	oxct1.L	228.3	341.56	269.213	279.695	157.709	163.525	158.1	-0.768309	0.1472	-5.21948	1.79423e-07	1.47714e-05
chr3L:41555997-41574815	NM_001090985	slc5a8.L	4788.56	4023.41	4087.84	3878.68	6205.15	5243.71	5292.58	0.459567	0.0883048	5.20433	1.94694e-07	1.58802e-05
chr1L:36928386-36947433	NM_001172180	cyp4v4	15.7918	43.0311	13.3652	36.1195	1.15962	0	1.07551	-1.00978	0.194122	-5.20181	1.97361e-07	1.595e-05
chr4S:98618485-98630080	NM_001097878	gmppb.S	200.06	89.6482	125.06	168.558	269.033	257.676	290.387	0.876878	0.168731	5.19689	2.02647e-07	1.62283e-05
chr1S:111437448-111448710	NM_001091336	habp4.S	712.999	893.793	965.158	759.436	504.437	579.771	575.397	-0.603245	0.116191	-5.19185	2.08219e-07	1.65244e-05
chr9_10L:51483961-51492859	NM_001093564	des.1.L	91.4281	54.6854	19.0931	47.2332	213.371	99.1061	115.079	1.07481	0.207893	5.17004	2.3404e-07	1.84077e-05
chr1L:166095935-166135765	NM_001087208	rfc5.L	154.546	250.119	164.201	220.422	82.3334	108.026	102.173	-0.881875	0.17231	-5.11797	3.08841e-07	2.40759e-05
chr5S:1456270-1471150	NM_001089866	mdh1.S	698.752	1198.6	656.804	877.056	475.446	561.932	422.675	-0.769004	0.151153	-5.0876	3.62629e-07	2.77774e-05
chr5S:1456270-1471150	NM_001316895	mdh1.S	698.752	1198.6	656.804	877.056	475.446	561.932	422.675	-0.769004	0.151153	-5.0876	3.62629e-07	2.77774e-05
chr9_10L:29123337-29132803	NM_001095024	ptges3l.L	91.9963	56.4784	56.3247	51.8639	143.793	120.909	122.608	0.927719	0.182555	5.08185	3.73778e-07	2.83846e-05
chr1L:38052431-38070906	NM_001093348	enpp6.L	220.75	311.976	281.624	285.252	190.178	144.695	110.777	-0.812229	0.160394	-5.06395	4.10667e-07	3.09194e-05
chr3L:119544491-119567386	NM_001122880	retsat.L	712.608	480.514	553.701	625.146	968.287	816.635	831.369	0.600309	0.11868	5.05821	4.23216e-07	3.15942e-05
chr7S:34767266-34787570	NM_001086353	psap.S	1617.49	1998.26	1788.07	1860.62	1326.61	1393.43	1337.93	-0.454163	0.08991	-5.05131	4.38793e-07	3.24817e-05
chr2L:154896753-154905486	NM_001094201	ccna1.L	99.7825	148.816	244.392	71.3129	39.4272	36.6693	58.0775	-1.04978	0.20833	-5.03901	4.67951e-07	3.43515e-05
chr2L:146570225-146655062	NM_001089226	ppp1r1a.L	627.84	389.073	353.223	573.282	962.489	638.243	850.728	0.762517	0.151396	5.03656	4.73961e-07	3.45051e-05
chr6S:85520029-85540667	NM_001091597	enosf1.S	158.699	274.324	165.156	222.274	86.9719	123.883	79.5877	-0.905134	0.179877	-5.03196	4.855e-07	3.50555e-05
chr7L:106353928-106363575	NM_001094775	akt1s1.L	3264.33	3884.46	3609.56	3788.85	2841.08	2580.72	2881.29	-0.424431	0.0844147	-5.02792	4.95821e-07	3.55096e-05
chr5L:138641442-138649157	NM_001087463	pgat.L	1160.61	837.314	890.694	1040.98	1363.72	1562.9	1268.03	0.555706	0.110621	5.0235	5.07383e-07	3.60447e-05
chr8L:56656760-56671047	NM_001167742	egln2.L	85.7259	44.8241	48.6875	57.4208	111.324	133.793	118.306	0.933771	0.186645	5.00292	5.6467e-07	3.97934e-05
chr5L:14661240-14677641	NM_001093642	bpnt1.L	376.859	544.165	440.097	472.332	301.502	306.238	196.818	-0.736148	0.147349	-4.99593	5.85518e-07	4.09351e-05
chr7S:84105665-84107664	NM_001088319	xicl	2066.78	1615.46	1682.1	1843.02	2589.44	2212.05	2458.61	0.471679	0.0945103	4.99077	6.014e-07	4.17145e-05
chr9_10L:100283076-100291454	NM_001086098	xaldb	704.463	423.14	571.839	621.441	840.728	903.848	865.785	0.624862	0.125728	4.96996	6.69654e-07	4.60858e-05
chr4S:51624068-51663048	NM_001096512	vps35.S	871.518	1070.4	1094.99	953	720.127	644.19	746.403	-0.526052	0.105895	-4.96769	6.77557e-07	4.62682e-05
chr9_10S:101107407-101120097	NM_001086491	sept12.S	301.165	214.259	246.301	220.422	373.399	381.559	371.051	0.648968	0.130779	4.96232	6.96549e-07	4.64841e-05
chr9_10L:84596292-84600934	NM_001088953	actb.L	13094	14147.4	15512.2	15551.8	12140.1	10640	10572.3	-0.42069	0.0847662	-4.96294	6.94336e-07	4.64841e-05
chr9_10L:80837486-80841702	NM_001090665	eef1b2.L	5690.63	5001.47	4796.19	4952.08	6272.41	6394.33	6727.31	0.381515	0.0768539	4.96416	6.89974e-07	4.64841e-05
chr2L:162774154-162793251	NM_001093264	birc2.L	833.875	632.02	731.267	655.708	975.244	1073.32	935.693	0.526604	0.106182	4.95944	7.06969e-07	4.68248e-05
chr8L:10653112-10671955	NM_001087993	hspa5.L	3814.46	2816.75	2808.6	3687.9	4483.11	4465.72	4624.69	0.509367	0.102864	4.95184	7.35159e-07	4.75489e-05
chr8S:27151679-27155201	NM_001092825	ptgds.S	54.2441	18.8261	30.549	31.4888	84.6526	79.2849	80.6632	1.0096	0.203895	4.95159	7.361e-07	4.75489e-05
chr6S:8616029-8634560	NM_001094021	galnt11.S	1333.88	1890.68	1369.93	1556.84	1077.29	1041.61	1066.91	-0.552438	0.111524	-4.95353	7.28796e-07	4.75489e-05
chr8L:10666473-10671954	NM_001172177	hspa5b	3814.12	2815.85	2808.6	3687.9	4481.95	4465.72	4624.69	0.509366	0.102888	4.95069	7.39493e-07	4.75489e-05
chr3S:65249503-65258672	NM_001091468	tuba1a.L	1060.49	1254.18	1469.22	1116	781.587	912.767	829.218	-0.558202	0.1129	-4.9442	7.64563e-07	4.86517e-05
chr4S:57260177-57288955	NM_001096477	srsf11.L	3574.78	3057	2753.23	3186.85	4049.41	3921.63	4480.57	0.446401	0.0903022	4.94341	7.6769e-07	4.86517e-05
chr1L:206507030-206528797	NM_001088249	fech.L	272.421	415.968	280.669	357.491	189.019	203.168	188.214	-0.736342	0.149186	-4.93573	7.98525e-07	4.99949e-05
chr3L:24742734-24748434	NM_001093469	dck.2.L	225.087	300.321	244.392	332.485	173.944	159.561	139.816	-0.754291	0.152878	-4.93393	8.05911e-07	4.99949e-05
chr7L:121210411-121218579	NM_001096895	LOC733474.L	1481.49	1247.01	959.43	1261.41	2057.17	1820.58	1543.36	0.58839	0.119243	4.93436	8.04139e-07	4.99949e-05
chr2L:146391417-146393285	NM_001088881	birc5.1.S	174.14	206.191	275.896	209.308	122.92	121.901	108.626	-0.796201	0.161633	-4.92598	8.39377e-07	5.17068e-05
chr6L:298218-302552	NM_001172134	znf585b.S	510.923	619.469	695.945	564.02	429.061	354.8	402.24	-0.603876	0.122733	-4.92025	8.64327e-07	5.2874e-05
chr2S:20431908-20510487	NM_001087192	dscr1	98.0632	171.228	126.015	119.472	60.3005	43.6067	67.7571	-0.927804	0.189274	-4.90192	9.49045e-07	5.698e-05
chr6S:41755482-41775849	NM_001088590	dync1li1.S	333.716	453.62	401.91	387.127	240.042	263.622	255.971	-0.635414	0.129649	-4.90103	9.53377e-07	5.698e-05
chr9_10S:17446783-17451061	NM_001092917	cox4i2.S	666.309	894.689	677.806	888.17	507.916	567.878	461.393	-0.613141	0.125125	-4.90021	9.5732e-07	5.698e-05
chr1L:17905780-17954988	NM_001095903	crmp1.L	20.1248	47.5136	15.2745	50.0117	5.79812	0	2.15102	-0.972047	0.198236	-4.90349	9.41471e-07	5.698e-05
chr8L:81722031-81736436	NM_001086174	lgals3.L	1864.18	1389.55	1298.33	1788.38	2315.77	2276.47	2116.6	0.540941	0.110548	4.89326	9.9179e-07	5.86354e-05
chr7S:25203532-25210180	NM_001199796	pcdh8l.S	547.92	429.415	315.991	485.298	712.01	714.555	630.248	0.656553	0.134441	4.88356	1.04186e-06	6.11851e-05
chr1L:187483644-187572753	NM_001091480	col4a3bp.L	393.167	581.817	454.416	435.287	296.864	288.399	302.218	-0.649371	0.13309	-4.87919	1.06525e-06	6.21442e-05
chr9_10S:60127439-60130729	NM_001095731	dlx2.S	193.215	189.158	377.089	238.945	141.474	92.1687	120.457	-0.891705	0.18306	-4.87111	1.10975e-06	6.43143e-05
chr8L:79351780-79363980	NM_001092315	dhrs7.L	178.768	250.119	252.984	197.268	128.718	120.909	122.608	-0.761869	0.157307	-4.84319	1.27769e-06	7.30856e-05
chr3L:10370354-10384603	NM_001094442	tmem263.L	1860.85	1501.61	1509.31	1654.09	2129.07	2017.8	2353.21	0.453852	0.093706	4.84336	1.27663e-06	7.30856e-05
chr1L:89772882-89785532	NM_001086191	plin3.L	485.853	646.364	628.164	512.156	354.845	400.389	373.202	-0.59973	0.123917	-4.83979	1.29979e-06	7.38454e-05
chr7S:85411219-85418083	NM_001086778	sdhb.S	2821.11	2339.82	1790.94	2610.79	3162.3	3436.01	3586.82	0.549111	0.113486	4.83857	1.30774e-06	7.38454e-05
chr1S:123224960-123257354	NM_001091705	pitpna.S	144.476	224.121	191.886	163.927	85.8122	101.088	100.022	-0.814182	0.16839	-4.83511	1.33074e-06	7.46658e-05
chr2S:128763125-128767471	NM_001127798	hoxc8.S	254.954	169.435	183.294	211.16	339.77	314.166	311.898	0.678743	0.140463	4.83217	1.35051e-06	7.52953e-05
chr7S:87354513-87363468	NM_001092387	ddost.S	1830.63	1394.03	1690.7	1449.41	2139.51	2303.23	2006.9	0.479164	0.0993757	4.82174	1.42309e-06	7.88429e-05
chr1S:9555915-9572249	NM_001091359	chmp3.S	688.535	1028.26	641.529	921.511	554.301	512.379	473.224	-0.662045	0.137431	-4.8173	1.45511e-06	8.01126e-05
chr1L:149411748-149451525	NM_001093495	pitpnb.2.L	591.038	715.393	816.231	657.561	376.878	449.942	530.226	-0.618064	0.12879	-4.79899	1.59466e-06	8.72509e-05
chr9_10S:46808818-46819817	NM_001086708	des.1.S	136.091	118.336	42.9595	56.4947	263.235	164.516	171.006	0.961398	0.200405	4.79728	1.60831e-06	8.74545e-05
chr1L:151287364-151313381	NM_001087833	msi1.L	1399.79	1249.7	1093.08	1182.68	1646.67	1589.66	1636.93	0.443355	0.092529	4.79153	1.65517e-06	8.945e-05
chr8S:79479111-79487790	NM_001090657	csnk2b.S	2176.77	1738.28	1838.67	1968.98	2504.79	2421.16	2588.75	0.418672	0.0876983	4.774	1.80602e-06	9.64194e-05
chr7L:75317729-75329037	NM_001127750	zpr1.L	1091.92	1333.07	1239.14	1252.14	892.911	865.197	969.034	-0.461342	0.0966149	-4.77506	1.79653e-06	9.64194e-05
chr6L:298226-307520	NM_001087991	znf585b.L	464.27	566.577	640.574	499.19	384.995	333.988	360.296	-0.597475	0.125546	-4.75901	1.94547e-06	0.000103239
chr8L:119167702-119169456	NM_001098701	krtcap2.L	227.397	153.298	147.017	194.49	284.108	298.309	287.161	0.699261	0.147417	4.74343	2.10129e-06	0.00011084
chr9_10L:77665864-77670298	NM_001092835	c9orf64.L	300.593	437.483	336.039	358.417	209.892	235.873	225.857	-0.659987	0.139303	-4.73779	2.16064e-06	0.000113216
chr1S:135196717-135213746	NM_001094396	anapc7.S	445.04	665.19	494.512	494.56	329.333	347.863	338.785	-0.626632	0.132292	-4.73672	2.17204e-06	0.000113216
chr2L:28236184-28262491	NM_001086150	pir.L	518.449	798.766	505.013	643.669	396.592	393.451	373.202	-0.654213	0.138199	-4.73386	2.20293e-06	0.000114151
chr7S:43676934-43683255	NM_001086599	hspa1l.S	56460.5	47313.6	42887.9	53080.9	68623.1	65926.4	60930.8	0.426896	0.0902024	4.73265	2.21611e-06	0.000114151
chr7S:83421984-83428732	NM_001092340	rps9.L	1820.15	1689.87	1413.85	1477.2	2110.52	2164.48	2064.98	0.444462	0.0939372	4.73148	2.22886e-06	0.000114151
chr6L:103230251-103253506	NM_001114798	impa2.L	1201.2	1756.21	1244.87	1362.35	870.878	954.392	1018.51	-0.564212	0.119277	-4.73028	2.24209e-06	0.000114165
chr9_10L:1622371-1635473	NM_001090254	rara.L	300.806	221.431	206.206	250.984	407.028	382.55	336.634	0.644284	0.136647	4.71494	2.4178e-06	0.000122404
chr2L:92445020-92465797	NM_001086563	ywhag.L	41.7265	69.9256	76.3725	47.2332	18.554	17.8391	20.4347	-0.986344	0.210015	-4.69655	2.64594e-06	0.000133189
chr2S:29244561-29250087	NM_001087039	wdr4.S	1465.37	1159.15	1278.28	1233.62	1545.78	1825.53	1749.85	0.454406	0.0968887	4.68998	2.73236e-06	0.000136758
chr3S:60079468-60087499	NM_001096890	fbxl22.S	64.3341	37.6522	21.0024	41.6764	119.441	81.267	84.9652	0.952506	0.203879	4.67193	2.98383e-06	0.0001485
chr3L:9510105-9528454	NM_001086283	sparc.L	360.546	304.804	235.8	281.547	494	408.317	438.808	0.625105	0.133889	4.66882	3.0294e-06	0.000149921
chr6L:126011541-126049864	NM_001095142	cpne3.L	854.155	753.941	568.021	708.499	1004.24	940.517	1149.72	0.554918	0.119053	4.66111	3.14505e-06	0.000154775
chr7L:111408752-111476921	NM_001090143	ccdc63.L	117.405	68.1326	74.4632	89.8358	160.028	150.641	161.326	0.805842	0.172972	4.6588	3.1806e-06	0.000155655
chr9_10L:43542837-43555344	NM_001097706	cacng1.L	83.7482	58.2713	32.4583	52.7901	146.113	102.079	110.777	0.909686	0.195673	4.649	3.33541e-06	0.000162329
chr3S:101478856-101490005	NM_001171577	atp6v0e1.S	483.35	616.78	594.751	547.35	329.333	405.344	406.542	-0.566017	0.121955	-4.64119	3.46413e-06	0.000167081
chr3L:13108569-13190049	NM_001246315	LOC100653508	214.646	167.642	108.831	170.41	262.075	261.64	317.275	0.750159	0.161645	4.64078	3.47098e-06	0.000167081
chr2L:150464523-150470751	NM_001101757	krt5.7.L	39532.7	31683.5	23470.2	38678.5	46744.5	47937.6	48681.8	0.557683	0.120237	4.6382	3.51464e-06	0.000168263
chr8S:64123128-64162493	NM_001095941	mtm1.S	505.269	658.914	553.701	608.475	386.155	410.299	414.071	-0.540392	0.116781	-4.6274	3.70285e-06	0.000176316
chr8L:41782880-41863927	NM_001090193	chm.L	93.1641	129.99	137.471	114.842	57.9812	58.4726	60.2285	-0.840242	0.18199	-4.61696	3.8941e-06	0.000183439
chr5S:132685538-132701671	NM_001095422	dnajc27.S	68.7459	148.816	70.6446	87.0573	38.2676	38.6514	29.0387	-0.948485	0.205393	-4.6179	3.87639e-06	0.000183439
chr2L:150026147-150030291	NM_001087341	krt18.L	13248	12038.9	10551.8	11832.4	14838.6	14638	15588.4	0.373865	0.0810333	4.61373	3.95511e-06	0.000185322
chr2S:54946878-54949548	NM_001086736	rpl10a.S	4589.7	4096.03	3318.39	4153.75	5233.39	5580.67	5155.99	0.440258	0.0955543	4.60741	4.0771e-06	0.000190028
chr5S:52542846-52549210	NM_001092720	sgk1.S	749.828	721.668	987.115	1025.24	596.047	582.744	586.153	-0.571465	0.124149	-4.60307	4.16306e-06	0.000193013
chr9_10S:69154937-69167416	NM_001085989	myl1.S	70.6951	53.7889	21.0024	32.415	139.155	84.2402	93.5693	0.948852	0.20648	4.59538	4.31958e-06	0.000198183
chr4S:96453190-96464030	NM_001087118	eif3d.S	8762.97	7236.4	7612.43	8067.62	10134	9877.91	9649.47	0.359117	0.0781411	4.59575	4.31199e-06	0.000198183
chr9_10L:36678094-36724638	NM_001136167	caskin2.L	469.026	354.11	342.722	417.69	597.207	554.994	547.434	0.5543	0.120656	4.59405	4.34729e-06	0.000198421
chr3L:33301928-33475547	NM_001087487	ppp2r2b.L	56.0265	73.5115	106.922	69.4606	22.0329	28.7408	35.4918	-0.942853	0.20554	-4.5872	4.49225e-06	0.000200874
chr2S:74190822-74231855	NM_001090815	clic4.S	170.047	236.671	212.888	212.086	140.315	101.088	117.231	-0.734396	0.160064	-4.58815	4.47195e-06	0.000200874
chr9_10L:76626841-76637994	NM_001095772	pttg1ip.1.L	1772.53	1982.12	2290.22	1910.63	1426.34	1445.96	1579.92	-0.447142	0.0974482	-4.58851	4.46423e-06	0.000200874
chr5S:62435698-62561577	NM_001096940	bves.S	18.1756	49.3065	22.9118	25.0058	4.6385	3.96425	3.22653	-0.932984	0.203279	-4.58967	4.4395e-06	0.000200874
chr3S:90816806-90822780	NM_001094761	LOC495060	410.549	483.204	516.469	482.52	333.972	332.006	315.124	-0.544032	0.118847	-4.57759	4.70364e-06	0.000209264
chr5L:123344666-123348362	NM_001088120	scg2.L	60.2678	118.336	74.4632	75.9436	24.3521	41.6246	26.8877	-0.939654	0.205683	-4.56845	4.9134e-06	0.000216411
chr5S:12125989-12128060	NM_001088365	bix1.3.S	55.1165	75.3045	117.423	56.4947	28.9906	27.7497	24.7367	-0.950272	0.208002	-4.56858	4.91048e-06	0.000216411
chr6L:96069509-96120523	NM_001088257	fcp1	829.304	994.199	968.022	947.443	677.221	739.332	649.608	-0.463206	0.101612	-4.55859	5.14978e-06	0.000225694
chr2L:103261770-103287009	NM_001090934	nup88.L	1774.47	2204.45	1822.44	2138.46	1507.51	1474.7	1499.26	-0.435725	0.0956776	-4.55409	5.26118e-06	0.000229434
chr2L:92778682-92788658	NM_001091571	syap1.L	282.733	357.696	387.59	324.15	202.934	173.436	250.594	-0.664907	0.146287	-4.54523	5.48762e-06	0.00023813
chr7L:13761542-13772347	NM_001127872	nsmce4a.L	1391.18	1844.06	1401.44	1691.13	1088.89	1229.91	1091.64	-0.495443	0.109056	-4.54302	5.54536e-06	0.000239456
chr1L:104026762-104029544	NM_001091987	uba52.L	1664.74	1391.34	1317.43	1527.21	1846.12	1993.02	1913.33	0.419481	0.0926687	4.52668	5.99186e-06	0.000257475
chr1S:164719030-164725016	NM_001092508	rpl37.S	2412.29	2116.59	1880.67	2178.29	2632.35	2826.51	2839.34	0.406223	0.0898419	4.52153	6.13939e-06	0.000262533
chr4L:109778277-109782075	NM_001095045	rgs2.L	153.627	124.611	319.81	204.677	98.5681	77.3028	96.7958	-0.875311	0.19412	-4.50913	6.50943e-06	0.000277012
chr5S:59585494-59594190	NM_001095879	mfsd4b.S	156.151	229.499	216.707	165.779	111.324	106.044	107.551	-0.743578	0.165026	-4.50584	6.61122e-06	0.000279992
chr3S:119441768-119450194	NM_001112827	p2ry11.S	563.26	445.552	401.91	509.378	703.892	665.993	652.834	0.527638	0.117176	4.50296	6.70151e-06	0.000282457
chr7L:33810130-33860377	NM_001103186	hk1.L	138.365	61.8573	116.468	81.5005	215.69	141.722	212.951	0.837322	0.186216	4.4965	6.908e-06	0.000289774
chr3L:80954822-80969955	NM_001086534	znf592.L	1004.59	781.732	800.957	916.88	1167.74	1104.04	1256.19	0.46534	0.103618	4.49091	7.09185e-06	0.0002935
chr3L:96140920-96149502	NM_001093710	saxo2.L	77.0189	33.1698	37.2316	62.0515	126.399	101.088	102.173	0.889287	0.197965	4.49214	7.05108e-06	0.0002935
chr6L:56457220-56777286	NM_001096092	sugct.L	36.6297	67.2362	54.4154	51.8639	23.1925	6.93743	16.1326	-0.952523	0.212107	-4.49077	7.09678e-06	0.0002935
chr5L:94110088-94164422	NM_001093327	col9a1.L	162.36	111.164	85.9191	138.921	214.531	216.051	207.573	0.748015	0.166641	4.48878	7.16315e-06	0.00029486
chr8S:94827709-94883948	NM_001086758	casq1.S	15.7293	13.4472	20.0478	56.4947	1.15962	0	3.22653	-0.847587	0.188918	-4.48654	7.23899e-06	0.000295223
chr4L:16457918-16470467	NM_001094292	mob2.1.L	684.386	597.954	575.658	519.566	783.906	809.697	819.538	0.476862	0.10628	4.48683	7.22908e-06	0.000295223
chr4S:97237368-97300017	NM_001090928	iars.S	666.313	934.134	695.945	768.698	533.427	519.316	546.359	-0.53477	0.11948	-4.4758	7.61248e-06	0.000309025
chr1S:25155041-25174816	NM_001095693	ugdh.S	611.956	882.138	736.995	631.629	423.263	445.978	551.736	-0.591206	0.132205	-4.47189	7.75319e-06	0.000313293
chr4S:64526299-64538467	NM_001091087	urod.S	94.8742	150.609	87.8284	161.149	62.6197	56.4905	50.5489	-0.866549	0.193871	-4.46972	7.83234e-06	0.000314667
chr2L:14712679-14757661	NM_001091243	hunk.L	736.06	871.381	779	986.341	633.155	530.218	616.267	-0.521438	0.116679	-4.469	7.85863e-06	0.000314667
chr3S:44184426-44186752	NM_001085581	mespa.S	179.264	120.129	103.103	146.33	292.225	205.15	208.649	0.749644	0.167953	4.46342	8.06619e-06	0.000321516
chr4L:406193-408958	NM_001087823	myod1.L	550.599	516.374	397.137	388.053	716.648	629.324	656.061	0.559896	0.125543	4.45979	8.20411e-06	0.000325541
chr1L:19191680-19219516	NM_001088454	wdr1.L	526.34	624.848	643.438	633.481	417.465	480.665	358.145	-0.542932	0.121796	-4.45772	8.28375e-06	0.000327227
chr8L:119311811-119321336	NM_001094277	gba.L	152.504	287.771	140.334	200.973	106.685	105.053	74.2101	-0.834741	0.187311	-4.45645	8.33299e-06	0.000327702
chr3L:49554164-49563704	NM_001095899	amdhd1.L	227.1	397.142	195.705	318.593	141.474	177.4	132.288	-0.786458	0.176745	-4.44968	8.59998e-06	0.000336699
chr4L:92229045-92250355	NM_001087013	cnn3.L	1252.29	1583.19	1385.21	1396.62	1088.89	1095.12	964.732	-0.443658	0.0997756	-4.44656	8.72563e-06	0.000340107
chr4L:80678372-80686710	NM_001093012	rps8.L	2795.75	2419.61	1956.09	2610.79	3323.48	3121.84	3342.68	0.455923	0.102577	4.44467	8.80263e-06	0.000341596
chr5L:149343269-149364417	NM_001089779	LOC100036663.L	2278.53	1537.47	2012.42	2084.75	2646.26	2803.71	2586.6	0.477282	0.107414	4.4434	8.85482e-06	0.000342115
chr9_10L:91105311-91114669	NM_001114795	rsl1d1.L	1696.68	1385.06	1467.31	1513.32	1933.09	1858.24	2023.03	0.394306	0.0890004	4.43039	9.40648e-06	0.000361842
chr9_10S:59305505-59311834	NM_001087552	ssb.S	2206.65	3074.04	2116.47	2654.32	1799.74	1730.39	1864.93	-0.498923	0.112917	-4.4185	9.93898e-06	0.000380663
chr1L:153543525-153562933	NM_001086730	slc25a1.L	1864.39	1762.48	1263.97	1577.22	2170.82	2169.43	2242.44	0.479276	0.108585	4.41385	1.01546e-05	0.00038557
chr9_10L:111406127-111431150	NM_001086887	shmt1.L	700.615	903.654	762.77	834.454	613.442	594.637	494.734	-0.510166	0.11557	-4.41435	1.01314e-05	0.00038557
chr6S:88863511-88873106	NM_001096505	rnf138.S	23.0318	40.3417	50.5968	25.0058	5.79812	8.91955	7.52856	-0.924386	0.209487	-4.41261	1.02134e-05	0.000386136
chr1S:106162460-106184534	NM_001086675	anxa1	281.71	485.893	276.85	342.672	205.254	227.944	151.647	-0.739504	0.167903	-4.40435	1.061e-05	0.000399418
chr3S:88125378-88151061	NM_001086792	gns.S	690.903	574.645	582.34	564.947	855.803	762.126	805.556	0.460436	0.104583	4.4026	1.06962e-05	0.000400947
chr4L:25647680-25652428	NM_001096730	act3.L	27.9767	8.06834	10.5012	9.26142	80.0141	27.7497	32.2653	0.921655	0.209506	4.39917	1.08663e-05	0.000403888
chr4L:25647680-25652388	NM_001097066	MGC64484	27.9767	8.06834	10.5012	9.26142	80.0141	27.7497	32.2653	0.921655	0.209506	4.39917	1.08663e-05	0.000403888
chr9_10S:3170665-3173853	NM_001174017	hoxb9	197.292	96.8201	149.881	164.853	286.427	256.685	229.083	0.734002	0.166988	4.39552	1.10506e-05	0.000409013
chr2L:1403531-1424913	NM_001085895	nr1i2.L	1084.83	1717.66	1018.62	1264.18	904.507	802.76	801.254	-0.596033	0.135692	-4.39256	1.12026e-05	0.000412902
chr5S:49895891-49896553	NM_001171762	sf3b5.S	4824.65	4246.64	4018.15	4386.21	5191.64	5495.44	5609.86	0.351806	0.0803099	4.3806	1.18351e-05	0.000434399
chr8S:11045390-11054828	NM_001086842	eif5.S	5349.56	4968.3	3790.94	4768.7	6178.48	6058.36	6332.6	0.430829	0.0983809	4.37919	1.19121e-05	0.000435267
chr5S:30141703-30182220	NM_001090114	snx5.S	213.687	276.116	287.352	239.871	169.305	154.606	154.873	-0.64317	0.146914	-4.37787	1.19842e-05	0.000435267
chr4L:82674232-82682841	NM_001095473	tspan1.L	1526.86	1601.12	2147.02	1753.19	1331.25	996.017	1332.56	-0.534814	0.122174	-4.37746	1.2007e-05	0.000435267
chr1S:136221284-136229522	NM_001092921	rpl6.S	4590.79	3691.71	3829.13	4351.01	5166.13	5047.48	5459.28	0.38282	0.087657	4.36725	1.2582e-05	0.000450549
chr8L:55129750-55151804	NM_001094719	ccdc9.L	393.148	464.378	521.242	436.213	323.535	297.318	316.2	-0.544538	0.124654	-4.36839	1.25166e-05	0.000450549
chr9_10L:37112016-37117922	NM_001097107	mrpl38.L	736.398	948.478	805.73	850.198	571.695	579.771	662.514	-0.483623	0.11072	-4.36798	1.254e-05	0.000450549
chr3L:109949402-109969705	NM_001086989	fah.L	76.2038	180.193	53.4608	111.137	41.7465	28.7408	41.9449	-0.915144	0.209918	-4.35954	1.30336e-05	0.00046483
chr9_10L:85110924-85127539	NM_001086947	arpc1b.L	685.021	505.616	655.849	480.668	881.315	778.974	807.707	0.533824	0.122531	4.35664	1.32074e-05	0.00046913
chr8L:53395200-53405907	NM_001088907	flot1.L	1470.01	1758	1601.91	1673.54	1233.84	1255.67	1297.06	-0.391359	0.089878	-4.35434	1.33468e-05	0.000472175
chr8L:15611850-15617944	NM_001093853	rpl36a.L	3182.45	2702	2554.66	2976.62	3743.27	3465.74	3652.43	0.381633	0.0876911	4.35202	1.34891e-05	0.000475303
chr8L:24209482-24216279	NM_001086384	asb12.2.L	24.6733	8.96482	8.59191	10.1876	52.1831	33.6961	34.4163	0.919644	0.211359	4.35109	1.35461e-05	0.000475408
chr7L:97213562-97227918	NM_001093659	fam213b.L	310.703	552.233	294.989	372.309	208.732	260.649	175.308	-0.735636	0.169441	-4.34153	1.41492e-05	0.000494603
chr4L:17837639-17899317	NM_001122875	kcnq1.L	511.681	403.417	441.051	395.463	679.54	582.744	567.869	0.513378	0.118307	4.33936	1.42896e-05	0.000497538
chr4L:122702607-122732480	NM_001086414	poc1a.L	312.955	277.013	229.118	225.979	381.517	385.523	378.579	0.57458	0.132589	4.33355	1.46724e-05	0.000508856
chr2S:154204219-154245845	NM_001091200	capn5.S	277.96	467.067	250.12	366.752	178.582	179.382	225.857	-0.722463	0.166772	-4.33204	1.47735e-05	0.000510352
chr1L:131047988-131056837	NM_001094540	psat1.L	135.746	190.951	167.065	171.336	103.207	99.1061	82.8142	-0.722142	0.166762	-4.33038	1.48855e-05	0.000512214
chr3S:96954648-96957940	NM_001091097	egr1.S	162.429	133.576	275.896	253.763	91.6104	97.124	122.608	-0.803702	0.186323	-4.31348	1.60704e-05	0.000548698
chr5L:51202166-51221650	NM_001092370	memo1.L	104.692	165.849	134.607	120.398	74.216	66.4011	66.6816	-0.778881	0.180544	-4.31409	1.60265e-05	0.000548698
chr6L:13097893-13113503	NM_001088313	shh.L	236.652	185.572	137.471	195.416	331.653	318.131	251.669	0.669484	0.155445	4.30688	1.65572e-05	0.000563136
chr3L:55073371-55084541	NM_001093606	slc38a2.L	1074.34	749.459	793.319	1054.88	1379.95	1273.51	1194.89	0.517077	0.120128	4.30437	1.67458e-05	0.000567361
chr1L:11418741-11465985	NM_001087362	maea.L	180.944	130.886	133.652	127.808	216.85	277.497	198.969	0.683941	0.159026	4.30081	1.70176e-05	0.000574361
chr4S:38687378-38703632	NM_001088715	tk2.S	183.629	228.603	303.581	186.155	113.643	140.731	129.061	-0.72492	0.168651	-4.29835	1.72071e-05	0.000578296
chr1L:105471015-105481537	NM_001171699	gng10.L	50.6843	68.1326	111.695	50.0117	18.554	27.7497	27.9632	-0.903742	0.21029	-4.2976	1.72655e-05	0.000578296
chr5S:20801016-20819728	NM_001091594	ppm1b.S	499.434	630.227	624.345	529.753	384.995	401.38	425.902	-0.509601	0.118759	-4.29107	1.77814e-05	0.000593319
chr7S:80135339-80162644	NM_001086931	ruvbl2.S	385.202	584.506	336.994	545.498	248.16	300.292	295.765	-0.668195	0.156018	-4.28281	1.84551e-05	0.00061117
chr8S:91440111-91456752	NM_001101759	nr2f5.S	26.5055	10.7578	3.81863	13.8921	57.9812	31.714	40.8693	0.90062	0.210273	4.28311	1.843e-05	0.00061117
chr8L:109568579-109588532	NM_001086969	fkbp9.L	1591.5	1465.75	1299.29	1270.67	1933.09	1920.68	1659.51	0.423905	0.0990352	4.28034	1.86605e-05	0.000615658
chr4S:22714811-22717393	NM_001085897	myod1.S	1576.04	1508.78	1220.05	1196.58	1880.91	1669.94	1980.01	0.460029	0.10759	4.27574	1.905e-05	0.000626162
chr8S:25642236-25645073	NM_001093908	fos.S	58.1674	76.201	108.831	68.5345	23.1925	35.6782	36.5673	-0.875208	0.204888	-4.27165	1.9403e-05	0.000635396
chr7L:34221138-34266631	NM_001089208	pdlim1.L	756.421	609.608	590.932	690.902	899.869	901.866	845.35	0.452446	0.105995	4.26855	1.96744e-05	0.000641895
chr3S:34895141-34925193	NM_001095075	kif23.S	1220.82	1449.61	1393.8	1341.05	1079.61	1045.57	1015.28	-0.393691	0.0922668	-4.26687	1.98234e-05	0.000644369
chr4L:74376844-74416567	NM_001086703	pgm1.L	239.677	352.317	275.896	276.916	191.338	194.248	147.345	-0.648263	0.152251	-4.25787	2.06385e-05	0.000668401
chr7L:112436302-112443903	NM_001097778	LOC100144919.L	114.997	173.918	137.471	148.183	86.9719	58.4726	84.9652	-0.764532	0.179827	-4.25149	2.12356e-05	0.000685218
chr4S:7505041-7527097	NM_001086934	tnnt3.S	56.2232	31.3769	33.413	27.7843	99.7277	90.1866	54.851	0.870985	0.205305	4.2424	2.21139e-05	0.000710952
chr5L:150978287-150989984	NM_001092940	efhc1.L	138.649	70.8221	74.4632	130.586	185.54	183.346	187.139	0.766961	0.181388	4.22828	2.35484e-05	0.000747021
chr1S:158536798-158579101	NM_001093627	thbs4.S	50.9628	27.7909	18.1385	31.4888	110.164	64.419	53.7755	0.886248	0.209629	4.2277	2.36089e-05	0.000747021
chr2L:124909824-124929976	NM_001096352	MGC130644	638.631	474.239	496.421	588.1	768.831	686.805	817.387	0.498072	0.117766	4.22933	2.34392e-05	0.000747021
chr6L:96070376-96120224	NM_001096699	LOC779013	690.07	821.178	803.821	792.777	568.216	626.351	528.075	-0.454708	0.107497	-4.22995	2.33746e-05	0.000747021
chr9_10S:55508114-55512707	NM_001097938	dapl1.S	78.3803	92.3377	139.38	99.0972	39.4272	37.6603	62.3795	-0.838658	0.198395	-4.22722	2.36598e-05	0.000747021
chr2S:4093565-4098420	NM_001093830	rpl23a.L	1542.25	1316.93	1111.22	1453.12	1722.04	1831.48	1818.69	0.438931	0.103882	4.22528	2.38642e-05	0.000750785
chr3L:107237750-107280850	NM_001096559	clpx.L	410.561	489.479	550.837	439.917	309.62	337.952	335.559	-0.53181	0.125947	-4.22249	2.41615e-05	0.000757434
chr7S:77926766-77967719	NM_001172202	ric8a.L	500.109	689.395	557.519	553.833	431.38	409.308	359.22	-0.529559	0.125536	-4.21838	2.46067e-05	0.000768653
chr4S:31843635-31850520	NM_001087676	herpud1.S	566.065	420.45	457.28	514.009	689.977	676.895	637.777	0.48461	0.114904	4.21753	2.46992e-05	0.000768702
chr8L:25389953-25395231	NM_001095249	endog.L	229.891	349.628	259.667	263.024	144.953	168.48	193.592	-0.656542	0.155698	-4.21677	2.47828e-05	0.000768702
chr6S:85434344-85497826	NM_001096191	MGC115231	324.669	390.866	436.278	364.9	214.531	259.658	281.783	-0.5776	0.137093	-4.2132	2.51782e-05	0.000778227
chr4L:23996279-24008100	NM_001090809	hras.L	128.271	206.191	155.609	143.552	86.9719	90.1866	87.1162	-0.733805	0.174207	-4.21226	2.52824e-05	0.000778715
chr1L:209695789-209717708	NM_001087263	acaa2.L	965.864	734.219	869.692	841.863	1137.59	1104.04	1107.77	0.426288	0.101296	4.20832	2.57277e-05	0.000789669
chr3L:66630244-66636101	NM_001088725	spam1.L	798.485	189.158	275.896	526.049	1441.41	1214.05	1144.34	0.890343	0.211799	4.20371	2.62576e-05	0.000803135
chr5L:37765476-37813907	NM_001089623	rrbp1.L	2129.9	1584.98	1479.72	2134.76	2560.45	2283.41	2736.1	0.497229	0.118576	4.19332	2.749e-05	0.000835031
chr5L:53117994-53164028	NM_001092528	capn9.S	47.3949	26.8945	18.1385	31.4888	66.0986	78.2938	63.455	0.868572	0.207117	4.19363	2.74529e-05	0.000835031
chr7L:20384472-20398490	NM_001085590	hhex.L	273.053	479.618	274.941	300.996	187.859	174.427	220.479	-0.69574	0.166104	-4.18858	2.80709e-05	0.000849748
chr5L:28306154-28318389	NM_001094529	cnrip1.L	215.138	280.599	295.943	232.462	148.432	151.632	181.761	-0.634749	0.151642	-4.18584	2.84108e-05	0.000857091
chr9_10S:3263621-3268942	NM_001097117	gip.S	47.9403	60.0643	63.0073	87.9835	19.7136	26.7587	30.1143	-0.867441	0.207644	-4.17754	2.94675e-05	0.000885935
chr5L:1298042-1331551	NM_001096672	trmt6.L	1119.48	943.996	897.377	1024.31	1280.23	1243.78	1327.18	0.402873	0.0965374	4.17323	3.00306e-05	0.000899795
chr1L:88867711-88876531	NM_001087187	eef2.1.L	14304.4	12090.9	11818.6	13502.2	16813.4	16716.2	14885	0.356171	0.0855253	4.16451	3.12027e-05	0.000925471
chr5S:46673039-46680005	NM_001090578	tbxt.S	3491.94	3516	4274.95	4153.75	3032.42	2864.17	3110.37	-0.386742	0.0928324	-4.16603	3.09953e-05	0.000925471
chr6L:48139270-48162202	NM_001092175	cmtm8.L	1539.56	2026.05	1726.02	1627.23	1413.58	1150.62	1293.84	-0.447305	0.107391	-4.16519	3.11087e-05	0.000925471
chr7S:4546264-4554435	NM_001087007	tpi1.S	1916.97	2385.54	2068.74	2096.79	1582.89	1711.56	1656.28	-0.383864	0.0922438	-4.16141	3.16293e-05	0.000934976
chr7S:77926793-77967468	NM_001094881	ric8a.S	476.327	644.571	535.562	530.679	418.625	386.514	342.012	-0.521691	0.125411	-4.15986	3.18437e-05	0.000938163
chr1L:125223725-125315818	NM_001091819	jak2.L	64.9702	101.302	79.2365	95.3926	26.6714	36.6693	50.5489	-0.834964	0.201012	-4.15379	3.27008e-05	0.000960204
chr4S:15707200-15760491	NM_001089117	tspan18.S	49.0426	24.205	23.8664	33.3411	81.1737	70.3654	61.304	0.854366	0.205752	4.1524	3.2901e-05	0.000961112
chr1S:127061849-127099543	NM_001090079	mapk1.S	979.389	802.351	869.692	831.675	1120.2	1069.36	1183.06	0.405617	0.0976906	4.15206	3.29499e-05	0.000961112
chr8L:52275954-52290528	NM_001092613	neu1.L	58.5726	84.2693	100.239	65.7561	39.4272	32.705	29.0387	-0.840976	0.202649	-4.14993	3.32582e-05	0.000966902
chr4L:94543914-94557908	NM_001086944	gclm.L	581.795	730.633	639.62	683.493	525.31	470.754	440.959	-0.47533	0.114602	-4.14766	3.35892e-05	0.000973312
chr3S:89631965-89648025	NM_001087361	ube2n.S	583.36	414.175	417.185	566.799	751.437	684.823	665.74	0.528804	0.127554	4.14572	3.38749e-05	0.000978374
chr8S:96411837-96419880	NM_001086212	ssr2.L	1901	1615.46	1432.94	1751.33	2340.12	1935.54	2330.63	0.430829	0.104021	4.14177	3.44638e-05	0.000992129
chr1L:79851498-79856038	NM_001086140	hnrnpdl.L	48708	41963.4	40866.9	46253.4	56146.7	52542.1	54475.6	0.325942	0.0787331	4.13983	3.47566e-05	0.000997299
chr8L:119144294-119148955	NM_001091035	slc50a1.L	512.706	346.042	455.371	440.844	637.794	590.673	605.512	0.509797	0.123419	4.13063	3.61771e-05	0.00103469
chr7L:124784282-124791649	NM_001088995	rdd1.L	71.7487	126.404	80.1911	93.5403	38.2676	42.6156	49.4734	-0.815987	0.197625	-4.12898	3.64381e-05	0.00103878
chr6L:154034960-154039611	NM_001094674	LOC494849	1228.86	987.923	985.205	1130.82	1572.45	1294.33	1402.46	0.42969	0.10412	4.12686	3.67747e-05	0.00104499
chr7S:65073986-65096093	NM_001093538	rcn2.S	184.862	259.083	252.029	194.49	144.953	145.686	112.928	-0.664769	0.161137	-4.12549	3.69939e-05	0.00104784
chr9_10L:646604-655294	NM_001087245	rab5c.L	659.382	513.684	530.789	593.657	760.714	844.384	713.063	0.463396	0.112504	4.11892	3.8066e-05	0.00107132
chr8L:308850-315613	NM_001096381	slc35a2.L	1001.75	844.486	857.281	877.982	1183.98	1135.76	1111	0.389563	0.0945698	4.11931	3.80006e-05	0.00107132
chr7L:124784322-124791637	NM_001161385	LOC100301950	71.5943	126.404	80.1911	92.6142	38.2676	42.6156	49.4734	-0.81219	0.197735	-4.10747	4.00024e-05	0.00112223
chr3L:41098408-41101746	NM_001090393	egr1.L	179.806	159.574	300.717	249.132	112.484	114.963	141.967	-0.727553	0.177265	-4.10433	4.05488e-05	0.00113395
chr4L:9647799-9663722	NM_001088989	LOC100496293.L	878.21	797.869	607.161	664.044	1048.3	1315.14	836.746	0.556378	0.1359	4.09403	4.23946e-05	0.00118182
chr1L:108850649-108865913	NM_001095748	b3gnt3.L	1901.94	1395.82	1647.74	1774.49	2054.86	2144.66	2394.08	0.424033	0.103594	4.09321	4.25446e-05	0.00118226
chr3S:107790503-107831647	NM_001097115	ndfip1.S	55.2213	111.164	62.0527	67.6084	30.1502	23.7855	36.5673	-0.847063	0.207424	-4.08372	4.432e-05	0.00122772
chr2S:35740965-35750235	NM_001096218	gla.S	232.648	307.493	293.08	257.467	183.221	167.489	187.139	-0.58585	0.143509	-4.08234	4.45852e-05	0.0012312
chr5S:87646147-87649068	NM_001092413	fam43a.S	311.861	397.142	396.182	342.672	258.596	263.622	212.951	-0.55464	0.135949	-4.07975	4.50834e-05	0.00123961
chr1L:132871758-132901213	NM_001094405	golm1.L	550.517	340.663	428.641	520.492	772.31	607.521	633.475	0.564298	0.138332	4.0793	4.51716e-05	0.00123961
chr5L:112305053-112483276	NM_001097052	rsrc1.L	713.621	443.759	654.894	619.589	867.399	807.715	888.371	0.519568	0.127507	4.07483	4.60481e-05	0.00125975
chr7L:31567618-31571464	NM_001089101	itln1.L	2439.44	1470.23	849.644	1792.08	4275.54	3238.79	3010.35	0.838326	0.205885	4.07182	4.66473e-05	0.00127219
chr7S:20111442-20142317	NM_001091692	slc2a9.S	348.984	460.792	374.225	438.991	270.193	314.166	235.537	-0.559325	0.137407	-4.07057	4.6898e-05	0.00127507
chr7L:101126169-101131107	NM_001086269	rpl28.L	1172.29	1036.33	948.928	1013.2	1233.84	1340.91	1460.54	0.403725	0.0992192	4.06902	4.72111e-05	0.00127964
chr2L:25522608-25543219	NM_001089893	liph.L	533.291	427.622	336.994	508.452	654.028	627.342	645.306	0.533316	0.131139	4.06679	4.7665e-05	0.00128798
chr7S:87075673-87090914	NM_001087163	ddx19b.S	3966.6	5318.83	4183.3	4286.18	3057.93	3191.22	3762.13	-0.430952	0.106025	-4.06464	4.81071e-05	0.001292
chr3S:67741420-67763296	NM_001097720	optn.S	32.6504	52.8924	60.1434	37.0457	12.7559	15.857	17.2081	-0.86196	0.212027	-4.06533	4.79639e-05	0.001292
chr7L:45538183-45554234	NM_001091732	sncg.L	46.1164	69.9256	42.0049	94.4665	22.0329	26.7587	21.5102	-0.85494	0.21062	-4.05917	4.92479e-05	0.00131862
chr3L:4138247-4146623	NM_001096665	rab19.L	94.9524	43.9276	75.4179	66.6822	119.441	142.713	121.533	0.76393	0.188283	4.05735	4.96333e-05	0.00132491
chr1S:126574680-126604252	NM_001098709	slc25a1-b	546.667	476.928	398.092	477.889	665.625	632.297	629.173	0.468538	0.115501	4.05657	4.97986e-05	0.0013253
chr2S:60530642-60536361	NM_001086054	tuba3c.S	5020.09	4382.9	4187.12	4695.54	5841.03	5406.24	5607.7	0.331964	0.0819255	4.05203	5.07756e-05	0.00134723
chr3S:23404443-23429663	NM_001085945	slc18a1.S	324.316	266.255	151.79	292.661	440.657	394.442	400.089	0.655347	0.161786	4.05071	5.10621e-05	0.00134909
chr1S:160485600-160491945	NM_001096396	ccno.S	452.127	303.907	331.266	429.73	564.737	478.683	604.436	0.554916	0.137006	4.0503	5.11517e-05	0.00134909
chr4L:131754732-131763221	NM_001088556	frzb2.L	786.566	930.548	1061.58	789.073	598.366	671.94	667.891	-0.476526	0.117701	-4.0486	5.1525e-05	0.00135488
chr5S:109166349-109190654	NM_001086752	copb2.S	2036.77	1675.53	1849.17	1802.27	2195.17	2403.32	2295.14	0.355608	0.0879116	4.04506	5.23097e-05	0.00137142
chr4L:131783249-131827862	NM_001096776	arih2.L	412.34	573.749	459.19	448.253	327.014	327.05	338.785	-0.518661	0.128397	-4.03951	5.35636e-05	0.00140012
chr8L:119619739-119626532	NM_001090045	pklr.L	76.7695	137.162	75.4179	106.506	48.7042	46.5799	46.2469	-0.797737	0.197536	-4.03844	5.38083e-05	0.00140236
chr3S:81996918-82038301	NM_001092885	pphln1.S	581.757	709.117	635.801	693.68	467.329	460.844	523.773	-0.452876	0.112167	-4.0375	5.40239e-05	0.00140382
chr2S:77605049-77626868	NM_001091478	ywhag.S	50.6962	92.3377	82.1004	49.0855	33.6291	28.7408	18.2837	-0.844701	0.209327	-4.03532	5.45278e-05	0.00141275
chr5S:12112266-12114486	NM_001085602	bix1.2.S	40.4442	59.1678	85.9191	39.8241	27.831	14.8659	15.0571	-0.854818	0.212012	-4.03193	5.53207e-05	0.00142437
chr2L:63759758-63784059	NM_001091242	nucks1.L	17524	15399.8	14671.2	16394.6	19642.9	18475.4	20560.5	0.324098	0.0803856	4.03179	5.53527e-05	0.00142437
chr1L:210493770-210499078	NM_001166299	rpl17.L	2465.51	2235.83	1799.53	2277.38	2744.83	2778.94	2956.57	0.400885	0.0994422	4.03133	5.54614e-05	0.00142437
chr4L:54652618-54664846	NM_001091190	ca5b.L	1135.95	1774.14	1086.4	1266.04	850.005	1009.89	829.218	-0.546163	0.135742	-4.02352	5.73337e-05	0.00146603
chr2S:7078339-7098696	NM_001096930	shpk.S	146.746	233.982	185.203	150.035	100.887	106.044	104.324	-0.69068	0.171675	-4.02319	5.74162e-05	0.00146603
chr5L:36675767-36719920	NM_001086701	pygm.L	741.346	763.803	408.593	532.532	971.766	895.919	875.464	0.590061	0.146725	4.02155	5.78155e-05	0.00147196
chr6S:92615730-92621542	NM_001092903	MGC82136	4182.64	3725.78	3322.2	3923.14	4616.47	4636.18	4872.06	0.34851	0.0867763	4.01619	5.91475e-05	0.00150153
chr5L:49788045-49841780	NM_001094427	ppp1r14c.L	90.3622	126.404	130.788	105.58	62.6197	68.3832	48.3979	-0.74748	0.186406	-4.00995	6.0732e-05	0.00153732
chr2S:128741491-128743619	NM_001087546	hoxc6.S	345.298	289.564	208.115	306.553	456.892	394.442	416.222	0.570193	0.142313	4.00662	6.15947e-05	0.00155469
chr1L:133558211-133564036	NM_001087059	fbp1.L	2885.73	2683.17	2187.12	2594.12	3339.72	3393.39	3116.83	0.378965	0.0946407	4.00425	6.22134e-05	0.00155917
chr5L:62236105-62282082	NM_001090215	med23.L	1317.17	1125.98	1190.46	1083.59	1616.52	1478.66	1407.84	0.383318	0.0957208	4.00454	6.2137e-05	0.00155917
chr2L:178173145-178178703	NM_001127839	serpinh1.L	235.623	141.644	225.299	158.37	300.343	318.131	269.953	0.633056	0.158109	4.00391	6.23031e-05	0.00155917
chr8S:33891186-33926478	NM_001094672	fibcd1.S	248.218	450.034	224.344	290.809	173.944	156.588	193.592	-0.694575	0.173526	-4.00271	6.26199e-05	0.00156175
chr7L:59801041-59820580	NM_001096025	agtrap.L	243.794	352.317	284.488	270.433	166.986	173.436	215.102	-0.602947	0.150655	-4.00218	6.27608e-05	0.00156175
chr4L:105636648-105639125	NM_001087255	snu13.L	7109.42	5962.5	5649.66	6908.09	8306.39	7579.64	8250.23	0.363603	0.0908828	4.00079	6.31306e-05	0.00156653
chr1L:107492316-107508299	NM_001094124	nans.L	571.098	741.391	664.441	605.697	467.329	502.468	445.261	-0.465337	0.116657	-3.98893	6.63733e-05	0.00164237
chr9_10L:71953647-71961089	NM_001086198	ag1.L	1896.53	1411.06	1152.27	1976.39	2131.39	2353.77	2354.29	0.526927	0.13216	3.98704	6.69032e-05	0.00165084
chr4S:70345078-70356497	NM_001087287	txndc12.S	224.876	328.112	227.208	284.326	172.784	174.427	162.402	-0.610026	0.153056	-3.98564	6.72992e-05	0.00165557
chr2L:2690915-2716512	NM_001091428	gramd1c.L	344.025	441.069	417.185	380.644	289.906	293.354	241.99	-0.523238	0.131301	-3.98503	6.74707e-05	0.00165557
chr6S:108513974-108534413	NM_001086735	pabpc1.S	40020.8	34927.8	32592	38144.1	43932.4	42991.2	47537.5	0.333583	0.0837489	3.98314	6.80114e-05	0.0016642
chr4L:37473232-37478683	NM_001088514	LOC398156	841.04	889.31	1180.91	923.363	672.582	603.556	776.518	-0.493162	0.123982	-3.97767	6.95926e-05	0.00169818
chr9_10L:11492650-11503340	NM_001089254	sall4.L	2515	2781.78	2712.18	2947.91	2167.34	2206.1	2274.7	-0.330771	0.0832197	-3.97467	7.04774e-05	0.00171459
chr3S:45427726-45430060	NM_001093721	hypk.S	1709.47	1255.97	1642.01	1460.53	1886.71	1982.12	2029.49	0.4094	0.103018	3.97407	7.06548e-05	0.00171459
chr8L:2272051-2283353	NM_001093998	man1b1.L	1288.44	1064.12	1065.4	1208.62	1476.2	1482.63	1433.65	0.375244	0.094606	3.96639	7.29685e-05	0.00176588
chr8L:118374353-118402262	NM_001086467	celf3.L	81.2843	59.1678	46.7782	49.0855	125.239	127.847	79.5877	0.769517	0.194267	3.96114	7.45939e-05	0.00179821
chr2S:130387825-130397546	NM_001087056	krt8.S	23779.1	19799.7	17673.6	23670.3	28407.3	25711.1	27412.6	0.391246	0.0987969	3.96011	7.49168e-05	0.00179821
chr6L:42230652-42476068	NM_001091614	tbc1d5.L	280.303	353.214	355.132	306.553	215.69	232.899	218.328	-0.5355	0.135212	-3.96045	7.48096e-05	0.00179821
chr2L:27570292-27572900	NM_001086437	hist1h2am.L	382.374	539.682	511.696	361.195	262.075	276.506	343.087	-0.583979	0.147603	-3.95643	7.60782e-05	0.00182112
chr6L:114029971-114034187	NM_001086282	snai2.L	129.844	109.371	80.1911	84.2789	197.136	145.686	162.402	0.689743	0.174515	3.95235	7.7387e-05	0.00184743
chr1L:152561093-152574246	NM_001094126	crkl.L	2094.78	2527.18	2181.39	2395	1843.8	1728.41	1892.9	-0.360261	0.0911868	-3.9508	7.78902e-05	0.00185442
chr8S:4967910-5002231	NM_001122877	rbm25.S	11665.7	10551.6	9584.75	10742.3	12437	12729.2	13949.4	0.327551	0.0829366	3.94941	7.83427e-05	0.00186016
chr1S:9576712-9622656	NM_001095502	kdm3a.S	4614.29	4364.07	3905.5	3998.15	5123.22	5149.55	5145.24	0.31739	0.0803953	3.94786	7.88518e-05	0.00186722
chr9_10L:88482568-88510635	NM_001086112	emp2.L	3552.15	3056.11	2291.18	3486	3946.2	4337.88	4195.56	0.457946	0.116043	3.94634	7.93552e-05	0.0018741
chr2L:88610819-88619244	NM_001087433	gale.L	613.969	503.823	512.65	521.418	666.784	677.886	801.254	0.444092	0.112635	3.94276	8.05479e-05	0.00189718
chr9_10L:2231276-2241288	NM_001086496	stard3.L	805.984	625.744	646.302	764.067	975.244	915.741	908.805	0.427079	0.10835	3.94165	8.09239e-05	0.00190096
chr9_10L:36758193-36787326	NM_001094373	llgl2.L	825.526	1057.85	922.198	881.687	724.766	660.047	706.61	-0.422103	0.107233	-3.93631	8.27454e-05	0.00193858
chr2S:125823784-125843845	NM_001096807	MGC85066	1728.34	2140.8	1810.03	1976.39	1406.62	1400.37	1635.85	-0.391647	0.0996854	-3.92883	8.53588e-05	0.0019945
chr5S:25349841-25355462	NM_001092596	rps27a.S	2099.31	1827.03	1652.51	1989.35	2378.39	2320.07	2428.5	0.362818	0.0923945	3.92684	8.60709e-05	0.00200582
chr5S:110203325-110235705	NM_001087779	atp1b3.S	6119.59	5543.85	5236.29	5441.08	7387.97	6461.72	6646.65	0.324008	0.0825758	3.92377	8.71737e-05	0.00202616
chr1S:84751970-84771526	NM_001087223	gamt.S	783.47	723.461	637.71	635.333	916.104	925.651	862.558	0.409265	0.104333	3.92269	8.75641e-05	0.00202987
chr9_10S:25508831-25515067	NM_001086954	rpl27.L	2051.47	1701.52	1767.07	1926.38	2274.02	2309.17	2330.63	0.342104	0.087321	3.91777	8.93707e-05	0.00206091
chr7L:43207853-43213745	NM_001095516	LOC496367	960.209	1227.28	1038.67	1070.62	756.075	764.108	904.503	-0.427878	0.109214	-3.91777	8.93705e-05	0.00206091
chr6S:289930-292880	NM_001092489	ap5z1.S	649.437	335.284	670.169	459.366	725.925	932.589	773.291	0.613169	0.156693	3.91318	9.1087e-05	0.00208954
chr4L:105679393-105702523	NM_001095117	LOC495465	150.782	80.6834	138.425	78.7221	198.296	266.595	141.967	0.743249	0.189934	3.9132	9.10821e-05	0.00208954
chr1S:55092544-55098874	NM_001093842	rpl34	1173.13	961.925	881.148	1136.38	1360.24	1292.34	1406.77	0.415773	0.106546	3.9023	9.52839e-05	0.00218015
chr2L:148311262-148315739	NM_001090259	xhoxc8	298.268	244.74	177.566	267.655	397.751	332.997	368.9	0.576026	0.147707	3.89979	9.62781e-05	0.00219719
chr4S:93544072-93546940	NM_001095638	atf4-iii	1366.59	1166.32	1092.13	1260.48	1594.48	1420.19	1665.96	0.387089	0.0995351	3.88897	0.000100669	0.00228556
chr4S:93544072-93546939	NM_001095671	atf4.S	1366.59	1166.32	1092.13	1260.48	1594.48	1420.19	1665.96	0.387089	0.0995351	3.88897	0.000100669	0.00228556
chr9_10L:32842079-32850928	NM_001098440	LOC780741	5626.03	4974.58	4857.29	5203.99	6137.89	6058.36	6524.04	0.304947	0.0785021	3.88457	0.000102511	0.00232139
chr1L:152305731-152316845	NM_001097779	LOC100037048	278.179	345.146	343.676	313.036	222.648	210.105	234.461	-0.520845	0.134165	-3.88211	0.000103554	0.002339
chr3L:77850697-77905824	NM_001085886	kcp.L	136.637	83.3728	117.423	97.2449	177.423	174.427	169.93	0.651513	0.167935	3.87956	0.000104646	0.00235762
chr6L:99391922-99399952	NM_001094664	timm21.L	122.443	181.986	157.518	133.364	83.493	91.1776	87.1162	-0.671397	0.173273	-3.87479	0.000106719	0.00239817
chr4L:130888967-130920881	NM_001091806	slc26a6	529.105	740.494	557.519	582.543	408.188	433.094	452.789	-0.486876	0.125747	-3.87188	0.000108	0.0024208
chr5L:147641954-147698772	NM_001088680	tdrd6.L	313.015	372.04	356.087	388.053	255.117	249.747	257.047	-0.495331	0.12802	-3.86917	0.000109205	0.00244158
chr9_10L:113752289-113760229	NM_001085909	pisd-like.2.L	411.893	318.251	318.855	372.309	442.977	499.495	519.471	0.483684	0.125041	3.86822	0.000109635	0.002445
chr7S:39053579-39149199	NM_001090695	ssrp1.S	2365.78	1905.92	2121.25	2194.96	2639.31	2589.64	2743.62	0.341467	0.0883367	3.86552	0.000110852	0.0024659
chr7L:105712601-105727204	NM_001093490	rcn3.L	1340.85	1267.63	946.064	1126.19	1688.41	1678.86	1337.93	0.452865	0.117418	3.85687	0.000114846	0.00254831
chr8S:26725620-26746635	NM_001095072	glipr2.S	959.561	874.07	717.902	835.38	1223.4	1089.18	1017.43	0.422606	0.10966	3.85377	0.000116312	0.00257436
chr3L:142428604-142434733	NM_001095646	pop7.L	310.343	493.962	269.213	441.77	258.596	144.695	253.82	-0.680887	0.176815	-3.85085	0.000117707	0.00259871
chr2L:140045604-140056411	NM_001096868	rdh9	70.023	94.1306	106.922	83.3528	41.7465	45.5888	48.3979	-0.746132	0.193879	-3.84845	0.000118867	0.00261776
chr1S:157108269-157117067	NM_001095490	par2	202.241	305.7	201.432	254.689	158.869	161.543	131.212	-0.621774	0.161624	-3.84704	0.000119553	0.00262629
chr1S:167559016-167566696	NM_001088708	brix1.S	4429.01	3622.68	3690.7	4296.37	5087.27	4687.72	5189.33	0.348562	0.0906281	3.84606	0.000120031	0.00263022
chr4L:99920836-99939407	NM_001096261	slc35a3.1.L	73.4732	15.2402	62.0527	37.0457	127.559	63.4279	135.514	0.812181	0.211399	3.84193	0.000122068	0.00266824
chr4S:19958849-20288441	NM_001349444	nell1.S	298.123	716.289	218.616	478.815	126.399	136.766	111.853	-0.807219	0.210322	-3.83802	0.000124029	0.00270439
chr9_10L:32841992-32850931	NM_001096819	eif2s2.L	5780.34	5115.33	4993.81	5369.77	6286.33	6235.76	6681.06	0.300015	0.0783865	3.82738	0.000129517	0.00281707
chr1L:5482703-6393415	NM_001135224	nagk.L	78.4963	155.091	78.2818	92.6142	41.7465	50.5441	52.7	-0.768504	0.200856	-3.82615	0.000130164	0.00282418
chr4L:77782848-77792172	NM_001174030	ebna1bp2-a	3998.69	3424.56	3251.56	3871.27	4468.03	4399.32	4577.37	0.334516	0.0875143	3.82242	0.00013215	0.00286021
chr2L:147066786-147088083	NM_001088048	LOC100145274.L	731.61	1013.02	719.811	889.096	633.155	480.665	653.91	-0.50737	0.132803	-3.82048	0.000133192	0.0028757
chr3S:37065301-37071793	NM_001094097	selenos.S	572.698	484.997	517.424	426.951	638.953	633.288	734.573	0.448673	0.117481	3.81911	0.000133934	0.00288465
chr9_10S:21515419-21609771	NM_001087123	ttyh2.S	142.248	120.129	81.1458	95.3926	229.606	135.775	191.441	0.688795	0.180562	3.81473	0.000136334	0.00292918
chr2S:83082407-83123587	NM_001091885	gtf2i.S	152.198	193.64	228.163	158.37	118.282	117.936	96.7958	-0.642685	0.168585	-3.81224	0.000137714	0.00295165
chr6S:33156205-33163188	NM_001086921	hnrnpa2b1.S	29429.1	25451.1	25356.6	28059.3	31919.8	34052.9	31735.1	0.298168	0.0782706	3.80946	0.000139273	0.0029706
chr3S:57592782-57629152	NM_001091367	csnk1g1.S	1149.57	1296.31	1410.98	1217.88	989.16	935.562	1047.55	-0.378043	0.0992299	-3.80977	0.000139094	0.0029706
chr9_10S:47748309-47751019	NM_001095906	cdk5r2.S	44.4722	92.3377	70.6446	35.1934	22.0329	20.8123	25.8122	-0.804777	0.21164	-3.80258	0.000143198	0.00304694
chr4L:38472614-38482748	NM_001092125	gtf3c6.L	193.474	247.429	248.211	217.643	135.676	151.632	160.251	-0.571813	0.150607	-3.79673	0.000146618	0.00310471
chr2S:76872085-76897173	NM_001094003	unc45b.S	315.635	307.493	184.249	218.569	478.925	364.711	339.861	0.607914	0.160113	3.79677	0.000146594	0.00310471
chr8L:16023670-16069877	NM_001127736	arhgap36.L	281.546	201.708	192.841	248.206	439.498	323.086	283.934	0.589602	0.155317	3.79612	0.000146976	0.00310482
chr6L:148735507-148952073	NM_001090597	ptk2.L	615.007	820.281	737.949	615.884	463.85	489.584	562.491	-0.470853	0.124242	-3.78981	0.000150761	0.00317716
chr9_10L:37437956-37448624	NM_001091759	ubald2.L	1052.31	788.008	892.604	998.381	1123.68	1213.06	1298.14	0.409765	0.108346	3.78199	0.00015558	0.0032709
chr2S:67717149-67752325	NM_001096417	l3mbtl3.S	600.783	744.08	651.076	685.345	514.873	524.271	485.055	-0.416375	0.110155	-3.77988	0.000156901	0.00329081
chr1S:150833152-150843037	NM_001096667	arrdc3.S	154.409	169.435	203.342	205.603	115.962	115.954	116.155	-0.605503	0.160289	-3.77756	0.000158373	0.00331379
chr3L:127157066-127172957	NM_001091103	lrrc8e.L	5247.67	4298.63	4920.3	4615.89	6395.33	5495.44	5760.43	0.335239	0.0887796	3.77608	0.000159313	0.00332556
chr7L:6193403-6194438	NM_001280639	c3ar1.L	42.9698	51.0995	130.788	23.1535	22.0329	17.8391	12.9061	-0.791045	0.209555	-3.77488	0.000160083	0.00333373
chr1L:152766361-152779109	NM_001091734	gstt1.L	439.708	901.861	336.994	740.913	222.648	236.864	198.969	-0.800339	0.212134	-3.7728	0.000161423	0.00334827
chr5S:131929489-131934425	NM_001096023	stk35.S	109.423	147.023	161.337	117.62	82.3334	65.41	82.8142	-0.678436	0.179831	-3.77262	0.000161541	0.00334827
chr8L:21220219-21226159	NM_001090858	wnt11b.L	3191.44	3335.81	3590.46	3715.68	2845.72	2795.78	2865.16	-0.310427	0.0823497	-3.76961	0.0001635	0.00338093
chr3L:12902828-12920556	NM_001086312	tnni1.2.L	61.2603	40.3417	24.8211	44.4548	110.164	83.2492	64.5306	0.77126	0.204845	3.76509	0.000166492	0.0034284
chr4L:130446294-130460746	NM_001089035	rpn1.L	1962.48	1780.41	1666.83	1754.11	2227.64	2249.71	2096.17	0.323271	0.0858783	3.7643	0.000167018	0.0034284
chr4L:23904759-23906148	NM_001090197	fut3.L	154.896	237.568	140.334	223.2	90.4507	111.99	125.835	-0.671422	0.178345	-3.76475	0.000166717	0.0034284
chr2L:58021684-58038482	NM_001091212	sesn2.L	2411.84	2819.44	2880.2	2451.5	2002.67	2219.98	2097.24	-0.348412	0.092598	-3.76264	0.000168131	0.0034284
chr8L:113623445-113636165	NM_001092832	cfap45.L	199.824	143.437	175.657	121.325	187.859	295.336	275.33	0.633155	0.168257	3.76303	0.000167869	0.0034284
chr3S:34665324-34683873	NM_001096601	wdr76.S	175.503	235.775	219.571	198.194	154.23	125.865	119.382	-0.59408	0.157856	-3.76344	0.00016759	0.0034284
chr6L:63648437-63653068	NM_001086687	sec61b.L	6058.35	5166.43	4928.89	5932.86	6747.86	6853.19	6720.86	0.327358	0.0870265	3.76159	0.000168837	0.00343483
chr5S:109529186-109537737	NM_001086302	mrpl44.S	906.97	1160.94	982.341	980.784	730.564	823.572	763.612	-0.401047	0.106826	-3.75423	0.000173878	0.00352112
chr1L:49443014-49450120	NM_001110740	rps3a.L	1703.72	1568.84	1246.78	1578.15	1964.4	1907.79	1956.35	0.382367	0.101837	3.75468	0.000173561	0.00352112
chr7L:124972811-124981708	NM_001135062	rdd3.L	4043.65	2964.67	1752.75	3079.42	6491.58	4338.87	5634.59	0.738927	0.196911	3.7526	0.000175011	0.00353594
chr5S:99167956-99172296	NM_001171777	serp1.S	1182.52	969.097	863.964	1159.53	1254.71	1415.24	1432.58	0.420859	0.112233	3.74989	0.000176914	0.00356622
chr8S:131521-150261	NM_001096104	fam50a.S	978.845	1292.73	1013.85	1074.32	795.503	851.322	845.35	-0.408677	0.109112	-3.74548	0.00018005	0.00362115
chr4S:42004361-42006703	NM_001090451	foxc2.S	858.271	879.449	514.56	669.601	1043.66	1073.32	969.034	0.511833	0.136677	3.74483	0.000180516	0.00362224
chr9_10L:13832400-13849249	NM_001097949	rae1.L	734.671	1083.85	662.532	927.994	505.596	532.2	695.854	-0.541587	0.144666	-3.74371	0.000181321	0.00363013
chr1S:109327074-109336886	NM_001087094	hnrnpk.S	22564	20459.5	19846.4	20904.9	24508.7	25233.4	24431.3	0.268924	0.0719048	3.74	0.000184017	0.00367574
chr5L:81520123-81578834	NM_001093608	hace1.L	100.501	144.334	115.513	129.66	74.216	69.3743	69.9081	-0.666846	0.178938	-3.72669	0.000194012	0.00386664
chr6L:149075584-149079877	NM_001090161	rplp1.L	2011.89	1668.35	1476.85	2007.88	2392.31	2206.1	2319.87	0.396095	0.106409	3.7224	0.00019734	0.00392409
chr2S:77200772-77216714	NM_001091857	mdh2.S	168.907	274.324	167.065	210.234	110.164	151.632	100.022	-0.657402	0.176639	-3.72172	0.000197867	0.00392569
chr7L:12272805-12337561	NM_001094816	rtkn2.L	1006.01	1303.48	1094.04	1084.51	957.85	780.956	815.236	-0.414829	0.111496	-3.72057	0.000198772	0.0039348
chr6S:6789689-6829094	NM_001086147	vill.S	1220.72	1085.64	859.191	1135.45	1252.39	1494.52	1497.11	0.425927	0.114585	3.71712	0.00020151	0.00395346
chr5L:33173925-33236942	NM_001086639	vrk2.L	101.968	147.92	117.423	131.512	66.0986	83.2492	65.6061	-0.671524	0.18062	-3.71788	0.000200903	0.00395346
chr6S:111617260-111673469	NM_001087285	emc2.S	1047.74	1453.2	996.661	1227.14	935.817	818.617	855.03	-0.451058	0.121341	-3.71728	0.000201378	0.00395346
chr5L:84806790-84809843	NM_001095613	cst3.L	405.105	525.339	549.882	394.536	271.352	314.166	375.353	-0.532101	0.143103	-3.71831	0.000200557	0.00395346
chr7S:30898899-30916211	NM_001088775	cuedc2.S	135.863	174.814	207.16	138.921	85.8122	103.07	105.4	-0.645734	0.173778	-3.71585	0.000202518	0.00396106
chr8L:16493465-16535095	NM_001090870	nup62.L	3024.48	2340.71	2672.08	2882.15	3547.29	3156.53	3548.1	0.356442	0.0959336	3.71551	0.000202797	0.00396106
chr9_10S:38150508-38159247	NM_001091603	cfap52.S	85.3074	59.1678	43.9142	69.4606	104.366	108.026	126.91	0.704366	0.189702	3.71302	0.0002048	0.00399133
chr7S:65011715-65030609	NM_001091771	errfi1.S	107.335	142.541	179.475	101.876	73.0564	66.4011	80.6632	-0.694329	0.187103	-3.71096	0.000206479	0.00401517
chr5L:17363160-17399044	NM_001088102	parp1.L	7185.15	6372.19	5803.36	6899.76	8138.25	7646.04	8251.31	0.319049	0.086071	3.70681	0.000209889	0.00407249
chr1L:218761927-218767308	NM_001096130	MGC115657	169.007	198.123	260.621	183.376	97.4085	135.775	138.741	-0.627761	0.169446	-3.70478	0.000211571	0.00409611
chr1S:111763219-111767130	NM_001171969	cr1b	145.221	209.777	183.294	154.666	105.526	104.061	114.004	-0.615529	0.166253	-3.70236	0.000213604	0.00412641
chr3L:59521917-59579582	NM_001085560	met.L	17.2568	3.58593	3.81863	10.1876	25.5117	22.7944	37.6428	0.751048	0.202907	3.70144	0.000214379	0.00413232
chr9_10L:402659-417735	NM_001096733	stat3.1.L	109.765	161.367	112.649	151.887	83.493	79.2849	69.9081	-0.666576	0.180141	-3.70029	0.000215352	0.004142
chr2L:84165356-84167104	NM_001114802	marcksl1.L	11883.4	14189.5	13101.7	13068.8	9750.13	9181.19	12009.1	-0.361853	0.0978746	-3.69711	0.000218067	0.00418509
chr1S:117270984-117273180	NM_001086378	aplnr.S	1496.83	1472.02	1179.96	1223.43	1718.56	1739.31	1647.68	0.373433	0.101137	3.69234	0.000222204	0.00423678
chr1S:44987785-44995068	NM_001086856	rps3a.S	3737.88	3162.79	2526.02	3774.03	4459.92	4084.16	4420.34	0.418892	0.113429	3.693	0.000221624	0.00423678
chr3L:84807774-84814095	NM_001092464	rps17.L	2056.87	1753.52	1550.36	2022.69	2372.59	2257.64	2384.4	0.373012	0.10102	3.69245	0.000222107	0.00423678
chr6L:103193556-103209174	NM_001094989	cidea.L	3726.3	3342.98	3214.33	3289.66	3751.39	4550.95	4208.47	0.329636	0.0893118	3.69084	0.000223513	0.00425254
chr4L:80737059-80795298	NM_001097797	armh1.L	34.1081	82.4764	35.3223	37.9718	13.9155	18.8302	16.1326	-0.782141	0.212038	-3.68869	0.000225415	0.00427949
chr4L:77766151-77776828	NM_001096061	pif1.L	224.011	186.468	179.475	169.484	272.512	271.551	264.575	0.519527	0.14091	3.68694	0.000226965	0.00429964
chr2S:137012797-137037616	NM_001093223	hsph1.S	2508.1	2312.03	1757.52	2321.84	2984.87	3091.12	2581.22	0.405889	0.110107	3.68632	0.000227519	0.0043009
chr6S:86166344-86194867	NM_001087983	gata6.S	1773.13	1335.76	1166.59	1875.44	2149.94	2026.72	2084.34	0.465335	0.126304	3.68424	0.000229389	0.0043177
chr2S:124272427-124282048	NM_001094710	tspan31.S	415.436	683.119	421.003	424.173	295.704	344.889	323.728	-0.562587	0.15269	-3.68451	0.00022914	0.0043177
chr8L:82303096-82398127	NM_001088754	tyro3.L	111.725	157.781	148.926	123.177	89.2911	81.267	69.9081	-0.65031	0.176982	-3.67444	0.000238372	0.00447722
chr7L:45390159-45447902	NM_001087738	LOC397711	696.198	509.202	691.171	544.571	788.545	816.635	827.067	0.438292	0.119339	3.67265	0.000240045	0.00449905
chr9_10L:60365973-60372515	NM_001097934	dapl1.L	93.3244	146.127	118.377	105.58	63.7794	47.5709	78.5122	-0.696806	0.189909	-3.66915	0.00024336	0.00455151
chr5S:41090085-41150036	NM_001094152	strn.S	506.07	588.092	592.842	576.06	463.85	425.165	390.41	-0.421737	0.11497	-3.66823	0.000244235	0.0045582
chr2S:63401392-63409355	NM_001094156	fam46b.S	66.2823	77.0975	128.879	69.4606	45.2254	42.6156	34.4163	-0.746184	0.203523	-3.66635	0.000246041	0.00458218
chr9_10L:113739120-113744133	NM_001099900	pus3.L	971.216	762.01	815.277	926.142	1048.3	1125.85	1149.72	0.382837	0.104466	3.66471	0.000247614	0.00460176
chr6S:114038522-114166941	NM_001095310	eif3h.S	616.998	545.958	500.24	531.605	757.235	681.85	685.099	0.397927	0.108662	3.66206	0.000250197	0.00463997
chr4S:1683035-1693677	NM_001086777	slc3a2.S	422.611	331.698	316.946	358.417	648.23	459.852	420.524	0.522354	0.142681	3.661	0.000251237	0.00464947
chr2L:39741476-39755042	NM_001092981	arx.L	27.5013	9.8613	11.4559	18.5228	46.385	34.6871	44.0959	0.775741	0.21204	3.65847	0.000253725	0.00468442
chr4S:96897626-96899787	NM_001096523	MGC75753.S	2048.1	1881.72	1794.75	1764.3	2190.53	2242.77	2414.52	0.317337	0.0867515	3.658	0.000254189	0.00468442
chr8L:50182352-50186773	NM_001086664	gnb2l1	4264.9	3888.94	3252.51	4075.95	4755.62	4793.76	4822.58	0.339417	0.0928511	3.6555	0.000256685	0.00472054
chr2S:73717136-73739967	NM_001089091	ldlrap1.L	757.603	992.406	882.102	756.658	607.643	630.315	676.495	-0.421782	0.115518	-3.65123	0.000260988	0.00478967
chr2L:12487970-12772580	NM_001086205	setd4.L	217.835	165.849	162.292	186.155	267.873	290.381	234.461	0.537278	0.147231	3.64921	0.000263046	0.00481479
chr3L:141405807-141421206	NM_001086423	rnf167.L	351.54	484.997	349.404	423.247	291.066	275.515	285.01	-0.49761	0.136376	-3.64882	0.00026345	0.00481479
chr3L:97592014-97616276	NM_001086060	ckmt1b.S	14.6194	3.58593	4.77328	5.55685	34.7887	21.8033	17.2081	0.72707	0.199698	3.64085	0.000271741	0.00495604
chr9_10L:42922840-42933226	NM_001091615	prkar1a.S	567.448	784.422	614.799	601.066	510.235	474.718	419.449	-0.460635	0.12654	-3.64023	0.000272395	0.0049577
chr3L:15393541-15400396	NM_001085659	hand1.L	54.2201	28.6874	31.5037	40.7502	68.4179	88.2045	67.7571	0.739655	0.203258	3.639	0.000273701	0.0049712
chr9_10L:40448475-40483441	NM_001093844	rab40b.L	305.784	363.075	390.454	334.337	234.244	244.792	267.802	-0.48245	0.132699	-3.63566	0.000277269	0.00502497
chr4L:27060334-27084865	NM_001095184	kmt5b.L	276.704	212.466	244.392	217.643	321.216	330.023	334.483	0.486625	0.133866	3.63517	0.000277803	0.00502497
chr4S:58125367-58138172	NM_001086826	serbp1.L	3463.08	3013.08	2770.41	3372.08	3898.66	3951.36	3772.89	0.327881	0.090226	3.634	0.000279066	0.00503722
chr5L:158492702-158502865	NM_001096237	MGC130936	55.0462	92.3377	77.3272	59.2731	40.5869	31.714	29.0387	-0.742588	0.204382	-3.63333	0.00027979	0.00503722
chr5L:107792162-107867527	NM_001136170	pld1.L	143.902	172.125	204.296	163.001	100.887	108.026	115.079	-0.59819	0.164657	-3.63295	0.000280195	0.00503722
chr1L:7082262-7124411	NM_001086537	dctn1.L	560.255	661.604	682.579	601.992	462.69	520.307	432.355	-0.421208	0.116027	-3.63025	0.000283148	0.00506962
chr5L:46130072-46134221	NM_001096088	MGC115675	160.744	212.466	220.526	171.336	102.047	113.972	144.118	-0.603905	0.166352	-3.63029	0.000283099	0.00506962
chr7S:23225060-23378838	NM_001086152	slc22a15.2.S	100.518	138.058	150.836	102.802	68.4179	76.3117	66.6816	-0.665624	0.18353	-3.62677	0.000286983	0.00511698
chr8L:49306068-49324485	NM_001091273	eml2.L	415.349	513.684	505.013	440.844	324.695	376.603	331.257	-0.450839	0.124326	-3.62628	0.000287536	0.00511698
chr3S:75606671-75629345	NM_001095403	qrich1l.S	121.091	164.056	154.654	139.847	85.8122	96.1329	86.0407	-0.617294	0.17018	-3.62729	0.00028641	0.00511698
chr2L:88633812-88638966	NM_001092909	pithd1.L	620.17	524.442	572.794	489.929	701.573	697.707	734.573	0.396601	0.109432	3.62418	0.000289879	0.00513792
chr7S:5444457-5448654	NM_001246302	LOC100653490	109.445	154.195	99.2843	175.967	74.216	72.3475	80.6632	-0.676771	0.186715	-3.62463	0.000289377	0.00513792
chr3L:142773050-142780856	NM_001091845	eif4a1.L	24140	22560.9	20559.5	21963.5	25341.3	26459.4	27955.7	0.282987	0.078168	3.62024	0.000294327	0.00520628
chr4S:81923982-82007809	NM_001093501	LOC548351.S	136.441	217.845	146.062	159.296	82.3334	99.1061	114.004	-0.639214	0.176709	-3.61732	0.000297665	0.00525477
chr2S:124978292-124992553	NM_001168380	LOC100127312	563.242	679.533	768.498	556.611	470.808	384.532	519.471	-0.483856	0.133821	-3.61569	0.000299551	0.00527749
chr9_10L:44469942-44478299	NM_001088122	coil.L	1221.27	1610.08	1195.23	1412.37	1094.69	949.437	1065.83	-0.406749	0.112631	-3.61134	0.000304616	0.00535602
chr7L:124907421-124981716	NM_001088991	rdd4.L	4306.62	3202.23	1899.77	3310.03	6912.52	4507.35	6007.79	0.714116	0.197853	3.60932	0.000306997	0.00538682
chr8L:109552129-109562670	NM_001092754	rab25.L	899.049	676.844	600.479	922.437	1200.21	955.383	1038.94	0.478598	0.132619	3.60882	0.000307591	0.00538682
chr5L:152780340-152838643	NM_001090449	fzd3.L	319.514	232.189	262.531	288.03	375.718	399.398	359.22	0.477418	0.132426	3.60516	0.000311963	0.00545255
chr2L:102922878-102940536	NM_001086888	wsb1.L	2335.32	2232.24	2019.1	1955.09	2579.01	2681.81	2544.65	0.315923	0.087707	3.60202	0.000315749	0.0054969
chr7S:83772948-83801600	NM_001093611	acpp.S	11.9272	26.8945	22.9118	13.8921	4.6385	0	3.22653	-0.677852	0.188177	-3.6022	0.000315531	0.0054969
chr8L:38544671-38577619	NM_001089053	utp14a.L	4796.57	4132.78	4042.02	4600.15	5213.67	5097.03	5693.75	0.311	0.0864827	3.5961	0.000323028	0.00561253
chr9_10S:26446715-26451090	NM_001085939	tnnc2.L	23.5221	12.5507	6.68259	10.1876	59.1409	26.7587	25.8122	0.749114	0.208559	3.59185	0.00032834	0.00569359
chr4L:21761279-21765799	NM_001096142	fau.L	1706.11	1429.89	1240.1	1702.25	1962.09	1838.42	2063.9	0.392993	0.109499	3.58902	0.000331923	0.00574442
chr9_10L:75583187-75595129	NM_001086783	myl1.L	240.72	241.154	114.559	169.484	364.122	264.613	290.387	0.628594	0.175333	3.58514	0.000336896	0.00579632
chr8S:3825470-3830892	NM_001091783	srsf5.S	27582.9	25282.6	24837.3	24945.6	29028.9	30103.5	31299.5	0.260567	0.0726632	3.58595	0.000335854	0.00579632
chr3S:57379595-57422970	NM_001095951	cpeb1.S	36.7574	68.1326	50.5968	41.6764	18.554	16.848	24.7367	-0.757828	0.21136	-3.58549	0.000336452	0.00579632
chr4L:114559024-114597801	NM_001093500	zc3h7b.L	422.123	478.721	545.109	454.736	329.333	366.693	358.145	-0.441617	0.123239	-3.58341	0.000339134	0.00582346
chr8L:91921243-91929409	NM_001112854	egln3.L	399.597	282.392	374.225	305.627	391.953	490.575	552.812	0.505273	0.141079	3.5815	0.000341632	0.00585493
chr1S:29189077-29228047	NM_001085708	kit.S	342.032	276.116	215.752	321.371	418.625	356.782	463.544	0.522746	0.146109	3.57777	0.000346532	0.00592739
chr6S:21202461-21219279	NM_001087438	vim.S	126.428	45.7206	113.604	94.4665	199.455	165.507	139.816	0.694696	0.194321	3.575	0.000350229	0.00597899
chr1L:98013727-98065103	NM_001089089	casc3.S	1035.34	946.685	753.224	956.705	1247.76	1178.37	1129.28	0.389999	0.10911	3.57437	0.00035107	0.00597899
chr1L:98013727-98065110	NM_001099862	palm.S	1035.5	946.685	754.179	956.705	1247.76	1178.37	1129.28	0.389581	0.109005	3.57399	0.000351585	0.00597899
chr5L:28395493-28407498	NM_001085973	pno1.L	2425	2091.49	2147.98	2265.34	2699.61	2660.01	2685.55	0.294553	0.0824613	3.57202	0.00035424	0.00599606
chr7L:7440420-7462955	NM_001086983	gnb3-b	3113.25	2615.93	2384.73	3121.1	3376.83	3562.87	3618.01	0.356239	0.0997524	3.57123	0.000355312	0.00599606
chr7L:102575481-102582275	NM_001091231	cnfn.1.L	410.579	498.444	508.832	516.787	295.704	208.123	435.581	-0.576518	0.161374	-3.57256	0.000353505	0.00599606
chr7L:6935131-6942464	NM_001091337	acta2.L	435.078	461.688	522.197	555.685	420.944	324.077	325.879	-0.468969	0.131302	-3.57169	0.000354686	0.00599606
chr8L:61412409-61437950	NM_001096558	sel1l.L	319.611	391.763	400.001	339.894	280.629	253.712	251.669	-0.469873	0.131608	-3.57024	0.000356649	0.00600711
chr7S:77691776-77766795	NM_001096584	prr12.S	1648.94	1277.49	1456.81	1563.33	1880.91	1725.44	1989.69	0.358074	0.100513	3.56247	0.000367387	0.00617617
chr3S:70495204-70528020	NM_001090896	gnai1.S	1301.91	1531.19	1568.5	1334.57	1010.03	1199.18	1168	-0.367364	0.103274	-3.55716	0.000374889	0.00629028
chr3L:61102526-61135500	NM_001092511	aass.L	1315.85	1534.78	1462.53	1451.26	1170.06	1241.8	1034.64	-0.34732	0.0977019	-3.55489	0.000378131	0.00632061
chr2S:25335390-25341981	NM_001092882	upk1b.S	6396.87	5625.43	5942.74	5688.36	6621.46	7257.54	7245.71	0.281389	0.0791466	3.55529	0.000377564	0.00632061
chr2S:66332552-66344906	NM_001094501	ncdn.S	202.704	282.392	223.39	233.388	170.465	150.641	155.949	-0.538467	0.151504	-3.55415	0.000379206	0.00632656
chr1S:63049843-63064309	NM_001086306	metap1.S	325.024	407.899	383.772	359.343	238.883	291.372	268.877	-0.468046	0.131718	-3.55339	0.000380305	0.0063329
chr8L:66721698-66739954	NM_001087378	vrk1.L	455.545	257.29	458.235	347.303	478.925	658.065	533.453	0.550476	0.154957	3.55245	0.00038166	0.00634348
chr3L:67736779-67768818	NM_001096519	nampt.L	502.037	623.952	551.791	562.168	402.39	420.21	451.714	-0.411299	0.115806	-3.55161	0.000382882	0.0063518
chr1S:60749156-60784919	NM_001091466	MGC81379	546.076	425.829	527.925	424.173	620.399	664.011	614.116	0.423258	0.119214	3.5504	0.000384645	0.00635713
chr7S:59330211-59332240	NM_001095627	hes5.1.S	163.412	109.371	113.604	148.183	173.944	217.042	218.328	0.584385	0.164597	3.5504	0.000384646	0.00635713
chr4L:100233233-100252487	NM_001091388	slc30a7.L	975.061	814.006	780.909	919.659	1202.53	1129.81	1003.45	0.37959	0.107018	3.54698	0.000389673	0.00641902
chr8S:25456419-25463641	NM_001096274	tmed8.S	145.359	184.675	183.294	172.262	97.4085	112.981	121.533	-0.575871	0.162379	-3.54646	0.000390444	0.00641902
chr5L:100947657-100983476	NM_001097927	ccdc50.L	98.9482	145.23	140.334	100.949	55.662	77.3028	74.2101	-0.661001	0.186388	-3.54637	0.000390577	0.00641902
chr9_10L:46490868-46517269	NM_001093131	pdia5.L	1953.22	1553.6	1819.58	1795.79	2216.04	2183.31	2151.02	0.325053	0.0917122	3.54427	0.000393697	0.00645824
chr9_10L:64714269-64721030	NM_001088935	klhl41.L	67.2455	59.1678	26.7304	35.1934	131.038	79.2849	72.0591	0.73418	0.207213	3.54313	0.000395414	0.00646234
chr8S:94971982-94981917	NM_001095352	pex19.S	357.496	446.448	383.772	423.247	293.385	301.283	296.841	-0.444199	0.125367	-3.5432	0.000395306	0.00646234
chr4L:11390055-11450810	NM_001086122	far1.L	1097.82	1247.9	1224.82	1260.48	1026.27	995.026	832.444	-0.363547	0.102627	-3.54241	0.000396483	0.00646782
chr9_10L:45385546-45405472	NM_001091415	parp9.L	23.2568	46.6171	29.5943	31.4888	9.277	12.8838	9.67958	-0.746367	0.21079	-3.54082	0.000398892	0.00649507
chr6L:87772521-87796725	NM_001097757	bloc1s5.L	134.087	173.021	189.977	141.7	92.77	107.035	100.022	-0.599741	0.169434	-3.53968	0.000400608	0.00651099
chr8L:51486193-51495306	NM_001090854	psmb8.L	54.2864	96.8201	67.7806	60.1992	37.108	33.6961	30.1143	-0.724746	0.204814	-3.53855	0.000402329	0.00652691
chr1L:33436157-33454650	NM_001090022	ppat.L	3242.87	3012.18	2931.75	2713.6	3591.36	3392.4	3815.91	0.305069	0.0862349	3.53765	0.000403705	0.00653721
chr2L:17754056-17770259	NM_001093425	gabpa.L	787.981	982.544	839.143	878.909	635.474	655.092	736.724	-0.384582	0.108733	-3.53694	0.000404785	0.00654267
chr4L:120803502-120816137	NM_001171974	hyal2.L	548.612	371.144	472.555	512.156	664.465	705.636	565.718	0.460346	0.130181	3.5362	0.000405921	0.00654901
chr1S:169501696-169525058	NM_001087481	lman1.S	198.57	262.669	243.437	218.569	172.784	134.784	159.175	-0.539659	0.152787	-3.53209	0.000412289	0.00661365
chr4S:910407-913849	NM_001087607	foxa4.S	1140.51	1500.71	1273.51	1152.12	1010.03	873.125	1033.56	-0.396953	0.112378	-3.53231	0.000411946	0.00661365
chr1S:97259179-97275486	NM_001094991	fktn.S	160.993	166.746	230.072	200.973	120.601	123.883	123.684	-0.573428	0.162367	-3.53168	0.000412931	0.00661365
chr4L:107232585-107239381	NM_001095637	rpsa.L	1332.46	1184.25	940.337	1292.89	1553.9	1538.13	1485.28	0.390456	0.110516	3.53301	0.00041085	0.00661365
chr8L:10513181-10517808	NM_001096138	rpl35.L	1383.9	1169.91	1263.97	1241.03	1498.24	1558.94	1571.32	0.317436	0.0899208	3.53017	0.000415288	0.00663934
chr1S:154645343-154664470	NM_001091860	gtf2h2.S	215.213	184.675	183.294	142.626	253.958	255.694	271.028	0.524699	0.148685	3.52892	0.000417255	0.0066587
chr4S:88202552-88205886	NM_001095501	ndufa6.S	315.305	405.21	362.769	345.451	271.352	246.774	260.273	-0.462286	0.131069	-3.52705	0.00042021	0.00669372
chr8L:6868609-6876881	NM_001088413	surf6.L	2128.66	1712.28	1797.62	2055.11	2359.84	2211.06	2636.07	0.351107	0.0995865	3.52565	0.000422449	0.00671639
chr7L:34784922-34887672	NM_001090908	tll2.L	64.6487	89.6482	86.8737	81.5005	46.385	42.6156	40.8693	-0.687859	0.195126	-3.5252	0.000423158	0.00671639
chr9_10L:252639-263116	NM_001092671	coasy.L	455.093	320.941	428.641	387.127	528.789	539.137	525.924	0.441378	0.12527	3.52341	0.000426039	0.00674996
chr8L:14325129-14332002	NM_001091472	rps4x.L	4397.88	3940.94	3596.19	4204.68	4931.88	4650.06	5063.5	0.304812	0.0865277	3.52271	0.000427162	0.00675561
chr3L:134506627-134547167	NM_001092112	arrb2.L	1648.84	2131.83	1820.53	1654.09	1363.72	1468.75	1454.09	-0.36283	0.10302	-3.52194	0.000428398	0.00676301
chr3L:98121964-98233805	NM_001088801	furin.L	637.654	434.794	599.524	567.725	769.991	734.376	719.516	0.430283	0.122285	3.51867	0.000433712	0.00683465
chr3L:8004089-8040787	NM_001085661	ccnd2.L	334.879	441.966	409.548	348.229	264.394	228.935	316.2	-0.496437	0.141297	-3.51343	0.000442364	0.00694614
chr7L:108566545-108569459	NM_001096738	fth1a	1063.7	862.416	1003.34	893.727	1287.18	1091.16	1244.36	0.366905	0.104423	3.51364	0.000442007	0.00694614
chr9_10S:99287234-99324055	NM_001091429	llgl1.S	1072.75	792.49	1104.54	813.153	1275.59	1291.35	1159.4	0.419808	0.119613	3.50973	0.00044857	0.00703105
chr2S:73393383-73398199	NM_001097684	smim12.S	74.5329	113.853	105.012	77.7959	44.0657	50.5441	55.9265	-0.682119	0.194418	-3.50852	0.000450612	0.00705052
chr5S:19195995-19318164	NM_001096483	eml4.S	589.476	761.113	656.804	622.367	539.226	490.575	466.771	-0.410735	0.117205	-3.50441	0.000457613	0.00714737
chr5S:12097679-12100612	NM_001087825	mixl1.S	221.18	218.742	604.297	214.865	98.5681	98.1151	92.4938	-0.73085	0.208621	-3.50324	0.000459637	0.00716627
chr4L:10185338-10217909	NM_001092402	cttn.L	546.956	387.28	564.202	394.536	671.423	624.369	639.928	0.466373	0.133295	3.49881	0.000467345	0.00727358
chr3S:800648-917808	NM_001174037	sox5.S	164.651	164.056	92.6017	107.432	228.446	194.248	201.12	0.608359	0.173939	3.49754	0.000469562	0.00729518
chr5S:82687515-82701150	NM_001092198	b3gnt7.S	947.215	896.482	719.811	838.158	1092.37	1041.61	1094.87	0.368856	0.105541	3.49492	0.000474201	0.00735429
chr3L:14208840-14247316	NM_001096871	tnip1.L	7.58071	17.9296	10.5012	14.8183	1.15962	0	1.07551	-0.600128	0.171789	-3.49339	0.000476923	0.00738351
chr6S:106780962-106788017	NM_001087152	rpl30.S	1886.71	1723.04	1420.53	1798.57	2141.83	2084.2	2152.09	0.346356	0.0993127	3.48753	0.0004875	0.00753401
chr4L:42640645-42655860	NM_001097696	cdk10.L	115.519	150.609	141.289	148.183	97.4085	92.1687	63.455	-0.618032	0.177415	-3.48354	0.000494825	0.00763382
chr1L:169539035-169554245	NM_001096115	phax.L	3125.87	3366.29	3432.94	3548.05	2943.13	2812.63	2652.21	-0.287699	0.0826602	-3.4805	0.000500488	0.00770769
chr3L:132732814-132748430	NM_001093202	dnase2.L	29.4564	65.4432	37.2316	30.5627	12.7559	17.8391	12.9061	-0.736409	0.211804	-3.47684	0.000507365	0.00778637
chr3L:67995265-68022756	NM_001096198	pus7.L	1073.97	1228.18	1182.82	1187.31	939.296	941.508	964.732	-0.321722	0.0925289	-3.47699	0.00050707	0.00778637
chr4L:141095159-141104946	NM_001086993	psmd6.L	2239.99	2079.84	1875.9	2023.62	2475.8	2615.41	2369.35	0.305034	0.0877504	3.47615	0.000508659	0.00779265
chr6S:86450467-86469089	NM_001089923	riok3.S	256.894	236.671	483.056	263.95	227.286	161.543	168.855	-0.62579	0.180151	-3.4737	0.000513335	0.00783703
chr8L:102501506-102507602	NM_001092163	MGC82682	124.31	199.019	158.473	119.472	78.8545	92.1687	97.8713	-0.628233	0.180834	-3.4741	0.000512577	0.00783703
chr3L:43151994-43184373	NM_001094303	appl2.L	161.204	216.949	216.707	164.853	107.845	131.811	129.061	-0.5692	0.163996	-3.47081	0.000518889	0.00790812
chr7S:83612895-83633950	NM_001097783	spib.S	21.7231	13.4472	4.77328	10.1876	40.5869	24.7765	36.5673	0.724315	0.208753	3.46972	0.000521004	0.00792665
chr8L:56050784-56057229	NM_001091986	blvrb.L	94.5422	163.16	75.4179	139.847	59.1409	68.3832	61.304	-0.684207	0.197232	-3.46904	0.000522319	0.00793294
chr9_10L:21042965-21083172	NM_001091039	MGC83104	378.51	466.171	528.88	355.638	307.301	315.158	297.916	-0.484537	0.1397	-3.46842	0.000523533	0.0079377
chr7S:73145345-73155895	NM_001089212	rpl18.S	1488.16	1312.45	1187.59	1426.26	1639.71	1680.84	1682.1	0.330812	0.0953952	3.4678	0.000524735	0.00794225
chr3S:80022053-80036326	NM_001091829	bmt2.S	564.004	615.883	779	575.134	468.488	490.575	454.94	-0.432121	0.124685	-3.46571	0.000528829	0.00799048
chr4L:640088-661552	NM_001094903	LOC100497709.L	12.4322	25.1015	17.1838	21.3013	5.79812	1.98212	3.22653	-0.674541	0.194698	-3.46456	0.000531108	0.00801119
chr6L:35212782-35221589	NM_001095618	gpnmb.L	3608.21	2558.56	3451.08	3263.72	4232.63	4537.08	3606.18	0.385584	0.111335	3.46327	0.000533658	0.00802217
chr3L:117344914-117350664	NM_001127747	snrnp200.L	2508.16	2154.25	2042.01	2429.27	2980.24	2599.55	2843.65	0.327882	0.0946622	3.4637	0.000532794	0.00802217
chr1L:195625641-195629585	NM_001096410	ccno.L	414.697	295.839	339.858	378.792	439.498	446.969	587.228	0.475028	0.137266	3.46065	0.000538882	0.0080869
chr9_10S:12139910-12152224	NM_001089234	rtf2.S	2435.65	2014.4	2311.22	2162.54	2589.44	2667.94	2868.38	0.309731	0.089527	3.45964	0.000540899	0.00810336
chr6L:60813647-60961925	NM_001095672	bmper.L	170.066	103.992	105.967	170.41	237.723	201.185	201.12	0.594052	0.172034	3.4531	0.000554174	0.00828815
chr1L:24868021-24920924	NM_001095777	tbc1d19.L	457.997	589.885	472.555	534.384	400.071	399.398	351.692	-0.428006	0.123987	-3.45201	0.000556433	0.00829377
chr4S:71307619-71313308	NM_001097027	cenpl.S	475.11	396.245	392.364	424.173	570.535	512.379	554.963	0.398024	0.115299	3.45211	0.000556219	0.00829377
chr1L:121866410-121916202	NM_001094701	ttc39b.L	101.841	173.021	102.148	121.325	67.2582	76.3117	70.9836	-0.648044	0.187761	-3.45144	0.000557606	0.00829721
chr4S:15486105-15530523	NM_001089639	ext2.S	266.803	172.125	267.304	180.598	289.906	386.514	304.369	0.550732	0.159635	3.44995	0.000560694	0.00832902
chr6S:95895431-95896847	NM_001094935	rrs1.S	1412.12	1274.8	1167.54	1306.79	1620	1531.19	1572.39	0.316587	0.0917777	3.4495	0.000561634	0.00832902
chr4S:1856018-1914674	NM_001088923	mark2.S	293.746	347.835	385.681	310.258	262.075	220.016	236.612	-0.474936	0.137798	-3.44662	0.000567652	0.00840185
chr7S:1917262-1939882	NM_001097803	casp7.S	359.02	474.239	425.777	372.309	280.629	265.604	335.559	-0.468163	0.135848	-3.44624	0.000568453	0.00840185
chr9_10L:111659001-111744618	NM_001093863	pemt.L	342.32	500.237	357.041	371.383	249.319	309.211	266.726	-0.496784	0.144255	-3.44378	0.000573642	0.00846434
chr4L:95025866-95034060	NM_001085968	rpl5.L	3984.75	3713.23	3054.9	3786.07	4444.84	4569.78	4339.68	0.322015	0.0935988	3.44038	0.000580901	0.00855712
chr3S:2234117-2245208	NM_001089860	samm50.S	661.45	848.969	676.851	749.249	545.024	593.646	554.963	-0.392282	0.114039	-3.43988	0.000581975	0.00855863
chr4L:41419916-41429211	NM_001089188	herpud1.L	513.293	434.794	428.641	458.44	575.174	584.726	597.983	0.381028	0.11084	3.43765	0.000586787	0.00861501
chr9_10L:41696989-41703633	NM_001095991	cfap52.L	339.564	238.464	255.848	323.223	459.211	426.156	334.483	0.498865	0.145246	3.43463	0.000593359	0.008697
chr1L:140918148-140931593	NM_001136174	sall2.L	63.7854	53.7889	20.0478	43.5287	97.4085	99.1061	68.8326	0.711114	0.207074	3.4341	0.000594533	0.00869974
chr9_10L:24172871-24187639	NM_001093081	dus1l.L	525.449	629.33	633.892	549.202	413.986	463.817	462.469	-0.399041	0.116226	-3.43331	0.000596262	0.00871056
chr5S:119047250-119054050	NM_001085900	rrm2b.S	4128.45	4609.71	4775.19	4246.36	3727.03	3761.08	3651.35	-0.28	0.0816037	-3.43121	0.000600888	0.00873578
chr4L:15625470-15662827	NM_001086613	cd81.L	277.161	213.363	230.072	216.717	335.132	406.335	261.349	0.515631	0.150298	3.43073	0.000601955	0.00873578
chr8L:71678289-71732996	NM_001088026	wdhd1.L	527.971	570.163	640.574	624.22	462.69	377.594	492.583	-0.419929	0.122401	-3.43077	0.00060186	0.00873578
chr3L:109167598-109216277	NM_001091691	glce.L	118.087	173.021	160.382	119.472	104.366	67.3922	83.8897	-0.625763	0.182383	-3.43104	0.000601273	0.00873578
chr9_10L:1098046-1103702	NM_001091523	krt19.L	2967.15	2764.75	2144.16	2786.76	3647.02	3412.22	3047.99	0.366324	0.106816	3.42949	0.000604722	0.00876151
chr5L:28407839-28426354	NM_001095400	wdr92.L	681.49	547.751	577.567	628.85	798.981	833.483	702.308	0.382073	0.111448	3.42826	0.000607463	0.00878676
chr8L:57091610-57099154	NM_001088746	olfm4.L	886.131	840.9	451.552	814.079	1065.7	1199.18	945.373	0.516847	0.151218	3.4179	0.000631069	0.00907656
chr3S:34794931-34808250	NM_001091733	eif3j.S	5932.02	5235.46	5250.61	5536.48	6266.61	6311.08	6991.89	0.277536	0.0812063	3.41766	0.000631619	0.00907656
chr9_10L:36055511-36068884	NM_001095186	slc9a3r1.L	420.745	565.68	472.555	439.917	381.517	351.827	312.973	-0.446489	0.130612	-3.41844	0.00062981	0.00907656
chr8S:98817716-98825099	NM_001097957	tstd1.S	115.423	43.0311	78.2818	110.211	142.634	125.865	192.516	0.676026	0.197733	3.41888	0.000628794	0.00907656
chr6L:83775700-83791936	NM_001092898	MGC82073	199.445	250.119	210.979	262.098	149.592	149.65	174.232	-0.519054	0.151936	-3.41626	0.000634876	0.0091085
chr4L:80415070-80443910	NM_001136166	ptch2.L	174.9	129.093	139.38	141.7	234.244	182.355	222.63	0.534603	0.156528	3.41539	0.000636909	0.00912282
chr9_10L:104922335-104951370	NM_001091550	jpt2.L	805.867	970.89	897.377	863.164	737.521	702.662	663.589	-0.353198	0.103454	-3.41408	0.000639987	0.00915202
chr3S:88630120-88639055	NM_001096737	rpl18a.S	2282.45	2009.02	1861.58	2194.96	2421.3	2685.78	2522.07	0.314619	0.0921803	3.41308	0.000642327	0.00917059
chr7S:5866870-5905070	NM_001091141	sgms1.S	597.543	515.477	503.104	522.344	724.766	619.413	700.156	0.377011	0.110635	3.40769	0.000655149	0.00930805
chr9_10L:899210-905616	NM_001093681	p3h4.L	844.683	844.486	631.028	670.527	1072.65	939.526	909.881	0.406035	0.119133	3.40824	0.000653839	0.00930805
chr8L:38067799-38124914	NM_001095455	LOC496296.L	140.976	204.398	155.609	164.853	99.7277	116.945	104.324	-0.571028	0.167591	-3.40726	0.000656181	0.00930805
chr8S:92596216-92602280	NM_001096079	isg20l2.S	1743.04	1562.57	1406.21	1651.31	2029.34	1850.31	1958.5	0.319802	0.09385	3.40759	0.0006554	0.00930805
chr6L:63510297-63535155	NM_001193403	erp44.L	2217.84	1944.47	1967.55	2063.44	2478.12	2477.65	2375.8	0.283281	0.0831706	3.40602	0.000659167	0.00933537
chr9_10S:94141503-94195672	NM_001095136	xpo6.S	150.907	178.4	231.027	153.74	110.164	115.954	116.155	-0.575132	0.168942	-3.40433	0.000663275	0.00937847
chr1L:161636048-161645005	NM_001087150	tmed2.L	2665.56	2307.54	2230.08	2554.3	2960.52	3183.29	2757.61	0.311868	0.0917315	3.39979	0.000674366	0.00950478
chr5L:127044591-127060397	NM_001091213	rbp1.L	166.101	236.671	185.203	188.007	133.357	118.927	134.439	-0.545154	0.160332	-3.40016	0.000673469	0.00950478
chr8L:51754276-51759251	NM_001096538	cenpa.L	303.203	352.317	438.187	298.218	240.042	226.953	263.5	-0.496396	0.14614	-3.39672	0.000681998	0.009597
chr8L:86983047-86993835	NM_001093316	psma6.L	622.167	496.651	528.88	584.395	705.052	713.564	704.459	0.370865	0.10928	3.39373	0.000689482	0.00968684
chr1L:134379878-134391273	NM_001089749	habp4.L	389.184	388.177	688.307	363.974	322.376	276.506	295.765	-0.559545	0.164928	-3.39267	0.00069216	0.00970897
chr4S:7093634-7118870	NM_001093546	cd81.S	972.075	857.933	770.408	878.909	969.446	1257.66	1098.09	0.377726	0.111371	3.3916	0.000694862	0.00973138
chr2L:89286608-89411794	NM_001091697	vmp1.L	220.625	281.495	272.077	237.092	169.305	186.32	177.459	-0.491226	0.144873	-3.39075	0.000697022	0.00974614
chr5L:128311358-128333966	NM_001086189	atp1b3.L	6117.5	5850.44	5341.3	5352.17	6987.9	6773.9	6399.28	0.274399	0.0809651	3.3891	0.00070122	0.0097893
chr3S:35816919-35824769	NM_001089252	rpl4.S	2837.78	2493.12	2049.65	2827.51	3411.62	3011.84	3232.98	0.362871	0.107098	3.38821	0.000703497	0.00980555
chr3L:93518308-93564879	NM_001095664	sema6d.L	925.905	830.142	689.262	880.761	1054.1	1077.28	1023.88	0.366785	0.108303	3.38665	0.000707507	0.00984587
chr3L:11848765-11863705	NM_001095128	thg1l.L	1143.58	986.13	983.296	1067.84	1296.46	1258.65	1269.1	0.315385	0.0931429	3.38603	0.000709115	0.00985267
chr9_10S:90773777-90802661	NM_001092689	tmem159.S	27.2215	50.203	45.8235	26.8581	9.277	12.8838	18.2837	-0.715067	0.211521	-3.3806	0.000723275	0.0100336
chr2L:14410128-14419508	NM_001093382	cfap298.L	316.113	240.257	271.122	275.064	359.484	403.362	347.389	0.444832	0.131704	3.37752	0.00073142	0.0101147
chr8L:57513626-57526952	NM_001096553	nop53.L	2932.7	2584.56	2435.33	2844.18	3237.67	3187.25	3307.19	0.29388	0.0870041	3.37777	0.000730756	0.0101147
chr2S:68940011-68954388	NM_001092504	dnali1.S	199.971	145.23	137.471	190.785	241.202	238.846	246.292	0.520498	0.154139	3.37682	0.000733295	0.0101209
chr1S:125887135-125896899	NM_001092642	adora2a.S	13.5328	11.6543	42.9595	15.7444	3.47887	1.98212	5.37755	-0.638866	0.18921	-3.37649	0.000734168	0.0101209
chr6L:142318987-142472392	NM_001086116	nsmce2.L	499.96	311.976	499.285	417.69	583.291	578.78	608.738	0.464703	0.137664	3.37562	0.000736492	0.0101371
chr9_10S:86893162-86922211	NM_001093358	kctd2.S	1434.96	1649.53	1610.51	1544.8	1166.58	1361.72	1276.63	-0.318443	0.0943782	-3.37412	0.000740526	0.0101609
chr1S:54904292-54965903	NM_001096734	lef1.S	165.216	118.336	141.289	128.734	216.85	202.177	183.912	0.530418	0.157186	3.37447	0.00073959	0.0101609
chr3S:35720105-35753238	NM_001097780	smad6.S	540.862	423.14	429.595	525.122	636.634	640.226	590.455	0.400928	0.11892	3.3714	0.000747864	0.0102456
chr7S:74346575-74353862	NM_001099866	rpl28.S	1695.11	1451.4	1362.29	1665.2	1965.56	1848.33	1877.84	0.326429	0.0968564	3.37024	0.000751035	0.0102731
chr3S:45411843-45416452	NM_001086257	rpl37a.L	868.443	762.906	697.854	795.556	1079.61	983.133	891.597	0.361592	0.107363	3.36794	0.000757325	0.0103431
chr5L:134877080-134890028	NM_001087853	rps7.L	2510.06	2216.1	1936.04	2466.32	2678.73	2807.68	2955.5	0.331059	0.098358	3.36586	0.000763065	0.0104053
chr6L:38169543-38174491	NM_001086251	agr2.L	378.505	156.884	115.513	323.223	569.376	575.807	530.226	0.713398	0.212077	3.36387	0.000768583	0.0104644
chr2S:7834380-7896699	NM_001095457	mospd2.S	78.003	104.888	99.2843	99.0972	47.5446	63.4279	53.7755	-0.635534	0.189141	-3.3601	0.000779136	0.0105917
chr3S:61414655-61424046	NM_001086175	MGC52968	13.7235	2.68945	3.81863	7.40913	31.3099	18.8302	18.2837	0.660947	0.196923	3.35637	0.000789738	0.0107193
chr8S:48231-52239	NM_001087197	rpl10.L	1747.4	1617.25	1429.12	1614.27	2008.47	1938.52	1876.76	0.305598	0.091079	3.3553	0.000792787	0.0107441
chr4L:53701927-53708588	NM_001092158	gins2.L	317.332	373.833	397.137	345.451	257.437	291.372	238.763	-0.446486	0.133103	-3.35445	0.000795241	0.0107608
chr4L:133710714-133723769	NM_001094378	cidec.L	238.723	227.706	167.065	180.598	287.587	272.542	296.841	0.493185	0.147114	3.3524	0.000801145	0.0108241
chr7L:5141413-5150483	NM_001096147	prdx3.L	920.848	1266.73	860.145	1072.47	728.244	841.411	756.083	-0.416345	0.124267	-3.35039	0.000806968	0.010886
chr2L:1306912-1314225	NM_001095580	fstl1.L	71.6564	38.5487	51.5514	49.0855	121.761	111.99	57.002	0.680915	0.203341	3.34864	0.000812093	0.0109384
chr5S:7180661-7199793	NM_001092043	cmtr1.S	226.041	239.361	275.896	292.661	186.7	186.32	175.308	-0.48384	0.144535	-3.34757	0.000815244	0.0109474
chr2S:141736206-141755533	NM_001097144	birc2.S	723.207	632.02	603.343	657.561	853.484	807.715	785.122	0.346144	0.10339	3.34796	0.000814075	0.0109474
chr3L:136221754-136223444	NM_001085836	sia1.L	11.2347	11.6543	41.0502	8.33528	1.15962	1.98212	3.22653	-0.597928	0.178638	-3.34714	0.00081649	0.0109474
chr7S:38092954-38135225	NM_001095864	MGC115313	1078.42	906.343	887.83	1029.87	1218.77	1119.9	1307.82	0.345121	0.103242	3.34284	0.000829261	0.0111018
chr8L:82684350-82704595	NM_001085563	snap23.L	157.856	225.913	155.609	201.899	128.718	119.918	115.079	-0.554405	0.165887	-3.34207	0.000831567	0.0111157
chr7L:38615920-38633312	NM_001094007	cuedc2.L	344.246	458.999	355.132	405.65	238.883	300.292	306.52	-0.463168	0.138655	-3.34043	0.000836493	0.0111646
chr9_10L:65940161-65960889	NM_001091547	pdk1.L	141.813	166.746	170.883	183.376	114.803	113.972	101.098	-0.54181	0.162255	-3.33926	0.000840015	0.0111947
chr7S:67832050-67834276	NM_001085767	esr10.S	375.817	244.74	324.583	355.638	431.38	423.183	475.375	0.461171	0.138194	3.33711	0.000846529	0.0112645
chr6S:106937547-106958318	NM_001092994	mtdh.S	7986.34	7072.35	6574.72	7758.29	8380.61	8620.25	9511.8	0.294695	0.0883368	3.33604	0.000849813	0.0112911
chr8S:75111325-75161823	NM_001093890	fhl1.S	54.2154	112.06	54.4154	62.9776	18.554	39.6425	37.6428	-0.701466	0.210388	-3.33415	0.000855613	0.0113511
chr9_10S:876173-879954	NM_001087819	krt.S	36033.8	29506.8	23569.5	38590.5	40713.3	39951.7	43871.1	0.402748	0.120818	3.33351	0.000857561	0.0113598
chr8L:53378748-53385033	NM_001087257	tubb.L	3308.37	2898.33	2892.61	3047.93	4056.37	3348.8	3606.18	0.301597	0.0905073	3.3323	0.000861322	0.0113925
chr4S:64995149-65003097	NM_001087374	rps8.S	3473.22	3113.48	2623.4	3410.98	3960.12	3641.16	4090.16	0.33291	0.099924	3.33163	0.000863396	0.0114028
chr3L:24516919-24522338	NM_001088168	wnt8a.L	910.598	796.973	1442.49	1004.86	746.798	756.18	716.289	-0.475974	0.142901	-3.33079	0.000865986	0.0114199
chr7S:6378576-6383700	NM_001085592	dkk1.S	214.812	335.284	265.394	204.677	143.793	127.847	211.875	-0.57916	0.173991	-3.32869	0.000872556	0.0114893
chr2S:28841324-28849110	NM_001086026	rrp1b.S	2392.26	2225.07	1788.07	2276.46	2752.95	2787.86	2523.14	0.336682	0.101206	3.32671	0.000878774	0.0115539
chr1L:219723914-219743063	NM_001089107	arhgef39.L	246.441	358.593	249.165	283.399	193.657	174.427	219.404	-0.50966	0.153246	-3.32577	0.00088175	0.0115758
chr5L:1449811-1491513	NM_001096666	gpcpd1.L	554.222	585.403	635.801	698.311	496.319	509.406	400.089	-0.407666	0.122668	-3.32332	0.000889519	0.0116445
chr1L:96074255-96078351	NM_001127778	c19orf25.L	256.066	345.146	257.757	316.741	193.657	234.882	188.214	-0.493154	0.148394	-3.32329	0.000889632	0.0116445
chr1S:90020971-90026274	NM_001088323	admp.S	554.503	753.045	780.909	455.662	417.465	449.942	469.998	-0.491544	0.147967	-3.32197	0.000893833	0.0116606
chr3L:139552005-139557577	NM_001097872	tm4sf5.L	12.4742	23.3085	9.54656	31.4888	2.31925	4.95531	3.22653	-0.631375	0.190102	-3.32125	0.000896154	0.0116606
chr5S:28578734-28624865	NM_001097942	xrn2.S	5800.38	7073.24	5797.63	6383.9	5348.19	5146.58	5052.74	-0.294532	0.0886583	-3.3221	0.000893415	0.0116606
chr7L:100322026-100394476	NM_001112872	LOC100127305	59.4287	38.5487	8.59191	50.0117	109.005	90.1866	60.2285	0.704686	0.21217	3.32132	0.000895924	0.0116606
chr1L:45861541-45882399	NM_001094400	etfdh.L	778.939	668.776	720.766	650.152	912.625	902.857	818.463	0.345313	0.103988	3.32069	0.00089796	0.0116669
chr2S:28998369-29015108	NM_001089111	atp1a1.S	19600.3	17692.1	17116	17531.9	24458.8	21695.3	19107.5	0.302819	0.0912352	3.3191	0.000903084	0.0117162
chr2S:13200047-13218182	NM_001087281	chmp2b.S	362.881	459.895	357.996	456.588	323.535	295.336	283.934	-0.443036	0.133541	-3.3176	0.000907952	0.011762
chr3L:165247-205987	NM_001091108	eps8.L	312.039	358.593	414.321	325.076	260.916	248.756	264.575	-0.446641	0.134762	-3.31429	0.000918775	0.0118847
chr1L:61291961-61296201	NM_001088287	pitx2.L	67.9658	44.8241	23.8664	62.0515	100.887	78.2938	97.8713	0.678399	0.204811	3.31231	0.000925279	0.0119279
chr1L:105177085-105200434	NM_001092366	anp32b.L	1689.07	1996.47	1648.69	2026.4	1473.88	1487.58	1501.41	-0.326157	0.098476	-3.31204	0.000926176	0.0119279
chr6L:85933150-85945903	NM_001096339	eci2.L	323.317	410.589	361.815	357.491	262.075	284.435	263.5	-0.429659	0.129714	-3.31236	0.00092513	0.0119279
chr6L:130408987-130415197	NM_001092466	rpl30.L	2062.72	1772.35	1634.37	2053.26	2238.08	2325.03	2353.21	0.322118	0.097339	3.30923	0.000935515	0.0120249
chr1S:59840669-59864652	NM_001093345	papss1.S	484.278	640.088	510.741	534.384	384.995	456.879	378.579	-0.418844	0.126586	-3.30877	0.000937067	0.0120249
chr5L:127682314-127744580	NM_001096831	pid1.L	42.7691	72.615	59.1887	46.3071	28.9906	24.7765	24.7367	-0.690808	0.208795	-3.30855	0.000937804	0.0120249
chr6L:135244324-135294555	NM_001089017	eif3e.L	3171.98	2767.44	2549.89	3140.55	3650.5	3503.4	3420.12	0.305891	0.0925958	3.30351	0.000954836	0.0122255
chr1S:114819205-114852067	NM_001086186	slc7a8.S	603.126	498.444	394.273	585.322	829.132	738.341	573.246	0.466072	0.14116	3.30174	0.000960883	0.0122851
chr5S:82791314-82801888	NM_001088088	ncl.S	83518.6	75541.2	69693.7	81631.1	92097.4	90737.6	91410.8	0.263569	0.079842	3.30114	0.000962934	0.0122935
chr9_10S:33550412-33577848	NM_001092087	llgl2.S	314.336	472.446	333.175	320.445	258.596	237.855	263.5	-0.488055	0.147896	-3.29999	0.00096689	0.0123083
chr8L:1011300-1016489	NM_001093566	cfp.L	613.607	571.956	500.24	433.434	829.132	803.751	543.132	0.464253	0.140668	3.30034	0.000965663	0.0123083
chr9_10L:67993965-68017653	NM_001173995	hoxd4.L	80.5306	55.5819	52.5061	64.8299	96.2489	101.088	112.928	0.618419	0.1875	3.29824	0.000972941	0.0123674
chr2S:22221299-22226157	NM_001087294	hmgn1.S	42797.6	38068.2	37389.1	41456	47736	46265.7	45870.5	0.250112	0.0758663	3.29675	0.000978096	0.0123972
chr7L:53441834-53456425	NM_001091318	clp1.L	553.231	436.587	547.018	430.656	630.836	633.288	641.003	0.393193	0.119258	3.29699	0.000977263	0.0123972
chr2L:113556621-113558264	NM_001096351	chst7.L	474.853	613.194	505.013	519.566	394.272	420.21	396.863	-0.396623	0.12041	-3.29394	0.000987925	0.0125038
chr1L:200952720-200974430	NM_001086345	c9.L	149.016	172.125	265.394	131.512	104.366	110.999	109.702	-0.604518	0.183611	-3.29239	0.000993395	0.012537
chr1L:96158379-96160997	NM_001095574	rps15	1007.84	964.615	808.594	879.835	1090.05	1171.43	1132.51	0.333737	0.101354	3.29278	0.000992031	0.012537
chr3L:44931525-44935731	NM_001091744	rps16.L	1737.04	1694.35	1434.85	1500.35	1878.59	1978.16	1935.92	0.306823	0.093313	3.28811	0.00100863	0.0126387
chr2L:6028190-6049781	NM_001092331	tmem39a.L	1088.08	1000.47	767.544	1043.76	1222.24	1270.54	1223.93	0.37145	0.112959	3.28835	0.00100776	0.0126387
chr4S:108347260-108380786	NM_001093537	rab7a.S	204.971	268.048	238.664	236.166	137.995	196.23	152.722	-0.509938	0.155043	-3.28902	0.00100537	0.0126387
chr8S:35437327-35446497	NM_001096859	plp2.S	122.542	97.7165	81.1458	100.949	160.028	155.597	139.816	0.56	0.170287	3.28857	0.00100697	0.0126387
chr2S:25093575-25111835	NM_001097015	tmem39a.S	1381.26	1267.63	986.16	1336.42	1560.85	1586.69	1549.81	0.359818	0.109387	3.28939	0.00100404	0.0126387
chr1S:2905424-2912976	NM_001093568	cct7.S	2208.83	2015.29	1863.49	1985.65	2720.48	2469.72	2198.34	0.315041	0.0958502	3.28681	0.0010133	0.0126792
chr7S:22127197-22136007	NM_001093340	MGC82549	61.2989	95.9236	108.831	47.2332	40.5869	38.6514	36.5673	-0.679802	0.206963	-3.28465	0.00102107	0.0127584
chr7S:78611133-78629507	NM_001085635	bax.L	818.058	1103.57	784.728	934.477	738.681	702.662	644.23	-0.398094	0.12122	-3.28406	0.00102324	0.0127674
chr1L:134655255-134659141	NM_001088462	tdgf1.3.L	887.37	977.165	1106.45	925.216	730.564	750.233	834.595	-0.351761	0.107174	-3.28214	0.00103021	0.0128361
chr8L:77374399-77379366	NM_001088719	btbd6.L	620.964	770.975	687.353	657.561	548.503	506.432	554.963	-0.365606	0.111481	-3.27953	0.0010398	0.0129373
chr5S:128626240-128681691	NM_001103188	cdc5l.S	5663.87	5300	5102.64	5015.06	5922.2	6504.34	6139.01	0.258546	0.0788483	3.27903	0.00104166	0.0129422
chr3L:133546338-133554299	NM_001092896	ccdc130.L	389.214	332.595	325.538	334.337	478.925	426.156	437.732	0.396423	0.12093	3.27812	0.001045	0.0129653
chr9_10L:89418292-89493627	NM_001087674	parn.L	313.252	380.108	433.414	300.996	238.883	275.515	250.594	-0.470053	0.143579	-3.27382	0.00106103	0.01313
chr1L:187163011-187178048	NM_001090813	enc1.L	965.276	869.588	797.138	871.499	1151.51	1118.91	983.015	0.335586	0.102508	3.27376	0.00106125	0.01313
chr8S:251020-255276	NM_001099887	slc35a2.S	1055.26	942.203	910.742	953.926	1107.44	1205.13	1212.1	0.311369	0.0952131	3.27024	0.00107458	0.0132762
chr2L:11392288-11428408	NM_001086533	kcnj15.L	434.455	357.696	359.905	396.389	494	522.289	476.451	0.386756	0.118288	3.26962	0.00107692	0.0132805
chr9_10L:92148617-92349541	NM_001092465	xylt1.L	73.1101	35.8593	48.6875	62.0515	126.399	75.3207	90.3428	0.655724	0.200567	3.26935	0.00107793	0.0132805
chr2S:159240411-159241905	NM_001091849	timm10b.S	260.46	360.386	245.347	328.78	207.573	200.194	220.479	-0.489981	0.149907	-3.26857	0.00108093	0.0132988
chr3L:103219675-103237776	NM_001087083	rgma.L	1698.91	1516.85	1341.29	1645.75	1963.24	1808.69	1917.63	0.317999	0.0973711	3.26584	0.00109138	0.0134086
chr6S:30542305-30545451	NM_001085883	twist1.S	330.62	328.112	202.387	271.36	405.869	397.416	378.579	0.480296	0.147171	3.26352	0.00110037	0.0134254
chr2S:117813678-117844046	NM_001086690	nr4a1.S	297.91	403.417	290.216	377.866	281.789	193.257	240.914	-0.496263	0.152031	-3.26422	0.00109764	0.0134254
chr1L:28145385-28156905	NM_001087300	rpl9.L	2329.17	2024.26	1894.99	2290.35	2559.29	2491.53	2714.59	0.305864	0.0937212	3.26355	0.00110025	0.0134254
chr5L:119950447-119978702	NM_001088779	LOC398319	1523.58	1772.35	1883.54	1478.12	1340.53	1379.56	1287.38	-0.334955	0.102608	-3.2644	0.00109694	0.0134254
chr5L:119950470-119978716	NM_001096761	gyg	1523.58	1772.35	1883.54	1478.12	1340.53	1379.56	1287.38	-0.334955	0.102608	-3.2644	0.00109694	0.0134254
chr9_10L:67242458-67361108	NM_001093104	agps.L	676.315	796.076	715.038	799.26	613.442	625.36	508.716	-0.371416	0.113824	-3.26307	0.00110211	0.0134281
chr9_10L:111359973-111381439	NM_001092230	top3a.L	383.779	343.353	291.17	338.042	413.986	456.879	459.242	0.408334	0.125172	3.2622	0.00110553	0.0134362
chr3L:92440961-92454474	NM_001197085	lysmd2.L	396.316	481.411	628.164	332.485	314.258	278.488	343.087	-0.518539	0.158958	-3.26212	0.00110583	0.0134362
chr7S:80036040-80039794	NM_001086458	MGC68606	768.048	512.788	694.035	718.686	897.55	1023.77	761.461	0.427969	0.131217	3.26154	0.00110808	0.0134425
chr2S:120659369-120674720	NM_001092532	pan2.S	282.698	342.456	309.309	343.599	236.563	256.685	207.573	-0.446023	0.136766	-3.2612	0.0011094	0.0134425
chr3S:80125622-80150252	NM_001086507	ifrd1.S	921.533	699.256	890.694	799.26	965.967	1143.68	1030.34	0.36543	0.112073	3.26064	0.00111163	0.013451
chr4L:28100379-28103828	NM_001087494	foxa4.L	2043.77	3041.76	2280.67	1800.42	1761.47	1639.22	1739.1	-0.422066	0.129459	-3.26023	0.00111322	0.0134518
chr7S:42524499-42558260	NM_001086835	glb1l2.S	262.851	234.878	160.382	237.092	318.897	291.372	334.483	0.491854	0.150902	3.25943	0.00111638	0.0134715
chr4S:70542025-70555694	NM_001095435	gpx7.S	109.124	148.816	163.246	102.802	77.6949	78.2938	83.8897	-0.595034	0.182693	-3.25701	0.00112592	0.013568
chr3L:138760715-138768112	NM_001088525	rangrf.L	410.637	346.042	344.631	353.786	442.977	532.2	444.185	0.402207	0.123565	3.25503	0.00113381	0.0136445
chr1L:144721301-144731409	NM_001085611	tbx3.L	891.533	636.502	541.29	994.676	1101.64	1042.6	1032.49	0.473363	0.145527	3.25274	0.00114299	0.0136987
chr4L:1083102-1087671	NM_001086882	rps13.L	2350.75	2013.5	1751.79	2388.52	2685.69	2507.39	2757.61	0.344709	0.105972	3.25282	0.00114265	0.0136987
chr3S:23344800-23366680	NM_001087144	atp6v1b2.S	1102.14	1467.54	1061.58	1245.66	920.742	1025.75	891.597	-0.377835	0.116137	-3.25336	0.00114048	0.0136987
chr2L:144056887-144065408	NM_001085954	dazap2.L	4525.12	3845.01	4127.93	4266.74	4644.3	5150.55	5116.2	0.273341	0.0840869	3.25069	0.00115125	0.0137231
chr3L:77326677-77351086	NM_001087127	ube2h.S	246.997	296.736	362.769	232.462	191.338	193.257	205.422	-0.502033	0.15439	-3.25171	0.00114712	0.0137231
chr3S:97340318-97366890	NM_001095071	kif20a.S	1264.1	1536.57	1489.26	1239.18	1152.67	1125.85	1041.09	-0.338411	0.104096	-3.25094	0.00115024	0.0137231
chr2L:17462976-17513485	NM_001095498	cyyr1.L	757.592	744.977	631.028	552.907	760.714	900.875	955.052	0.39953	0.122891	3.25108	0.00114968	0.0137231
chr2S:42004410-42029073	NM_001092418	MGC80993	103.339	72.615	61.098	90.7619	115.962	164.516	115.079	0.605224	0.186307	3.24852	0.00116005	0.0138086
chr4L:1640858-1646315	NM_001096007	MGC115216	36.2347	53.7889	59.1887	40.7502	19.7136	26.7587	17.2081	-0.68588	0.21116	-3.24816	0.00116156	0.0138086
chr6L:43373266-43412760	NM_001087066	rab5a.L	1611.67	2120.18	1768.02	1590.19	1263.99	1475.69	1451.94	-0.357842	0.110304	-3.24414	0.00117805	0.0139857
chr4L:113385621-113391476	NM_001086872	rpl3.L	9209.86	8150.82	7309.8	9164.17	10716.1	10276.3	9641.94	0.2993	0.0923176	3.24207	0.00118666	0.014069
chr5S:30046401-30098345	NM_001092468	rrbp1.S	589.498	453.62	523.152	549.202	691.136	678.877	641.003	0.367527	0.113515	3.23769	0.00120502	0.0142675
chr3S:11434359-11449648	NM_001092014	g3bp1.S	15578.5	14676.3	13539.9	14297.8	16622.1	17967	16368.2	0.252234	0.0779464	3.236	0.00121218	0.014333
chr9_10L:105270543-105272230	NM_001088853	LOC398404.L	688.484	629.33	483.056	652.004	810.578	761.135	794.801	0.386208	0.119392	3.23478	0.00121738	0.0143752
chr2L:108694331-108705927	NM_001092385	chst10.L	175.896	222.328	234.845	184.302	147.272	152.623	114.004	-0.520943	0.16116	-3.23246	0.0012273	0.0144729
chr4S:3452714-3481816	NM_001094703	syvn1.S	440.562	295.839	424.822	378.792	527.629	467.781	548.51	0.434534	0.134461	3.23168	0.00123065	0.014493
chr9_10S:28096007-28104032	NM_001094177	tgif2.S	2558.08	2740.55	3021.49	2708.96	2435.21	2279.44	2162.85	-0.28695	0.0888054	-3.23123	0.0012326	0.0144966
chr9_10S:83089988-83098097	NM_001096225	rps15a.S	1544.7	1293.62	1215.28	1554.07	1767.27	1646.15	1791.8	0.334466	0.103542	3.23024	0.00123688	0.0145082
chr3S:25998828-26010035	NM_001097659	nudcd3.S	517.708	646.364	540.336	588.1	474.287	442.013	415.147	-0.380572	0.117811	-3.23037	0.0012363	0.0145082
chr3L:130294781-130301915	NM_001095677	p2ry11.L	234.99	181.089	192.841	198.194	322.376	274.524	240.914	0.473204	0.146547	3.22903	0.00124213	0.0145504
chr6L:138551228-138580246	NM_001095453	slc30a8.L	5495.71	4283.39	2575.66	4579.77	8698.35	6174.31	6662.78	0.631793	0.195755	3.22747	0.00124889	0.0145908
chr9_10L:106488783-106496242	NM_001096421	foxj1.2.L	110.865	67.2362	55.3701	112.989	148.432	120.909	160.251	0.618034	0.191484	3.22761	0.0012483	0.0145908
chr1L:206472948-206499855	NM_001093479	nars.L	861.853	1081.16	885.921	963.188	785.066	787.894	667.891	-0.358507	0.111217	-3.2235	0.00126635	0.0147752
chr9_10S:90116117-90135853	NM_001090755	rac3.S	1197.05	1440.65	1300.24	1296.6	1071.49	1151.61	921.711	-0.336881	0.10457	-3.22157	0.00127489	0.014816
chr8S:7484777-7547100	NM_001095542	rtn1.S	51.5288	77.0975	59.1887	71.3129	30.1502	32.705	38.7183	-0.656169	0.203679	-3.22159	0.00127483	0.014816
chr2S:63905434-63937381	NM_001096508	phactr4.S	2258.52	1876.34	1887.36	2250.52	2646.26	2444.95	2445.71	0.30798	0.0955926	3.2218	0.0012739	0.014816
chr3L:4012848-4021641	NM_001096009	sinhcaf.L	987.878	799.662	949.883	743.692	1000.76	1016.83	1416.45	0.414672	0.12879	3.21975	0.00128303	0.0148909
chr8L:1338268-1349031	NM_001085710	lmo4.2.L	4063.31	2949.43	3495.95	4167.64	4456.44	4370.58	4939.81	0.349011	0.108498	3.21674	0.00129656	0.0150281
chr4S:491124-495619	NM_001086048	sssca1.S	443.188	361.282	403.82	355.638	446.456	501.477	590.455	0.411506	0.127963	3.21583	0.00130069	0.0150562
chr6L:91036142-91097833	NM_001093117	dtnbp1.L	58.6646	77.0975	87.8284	67.6084	44.0657	36.6693	38.7183	-0.641532	0.199666	-3.21302	0.00131346	0.0151841
chr7S:47173153-47212284	NM_001087613	ets1.S	243.971	199.916	153.7	230.609	250.479	316.149	312.973	0.497352	0.154915	3.21048	0.00132513	0.015239
chr2S:75175693-75213229	NM_001091319	ints2.S	502.042	605.125	559.429	549.202	413.986	461.835	422.675	-0.367953	0.114606	-3.21058	0.00132468	0.015239
chr6S:33209443-33237411	NM_001093136	snx10.S	6.30176	18.8261	7.63725	10.1876	1.15962	0	0	-0.513721	0.159978	-3.2112	0.00132183	0.015239
chr7L:109326111-109343200	NM_001127800	hspbp1.L	889.957	790.697	696.899	827.971	960.169	1134.77	929.24	0.35705	0.111198	3.21095	0.00132298	0.015239
chr9_10L:61909409-61924100	NM_001092185	gca.L	380.394	456.309	489.739	387.127	291.066	291.372	366.749	-0.433771	0.135186	-3.2087	0.00133339	0.015314
chr6L:38999272-39007000	NM_001086002	hnrnpa2	22528.6	21001.9	20018.2	20915.1	24313.9	25195.8	23726.8	0.234409	0.0730967	3.20683	0.00134206	0.0153935
chr1S:96482651-96495575	NM_001087120	rps6.S	1443.66	1240.73	1176.14	1408.66	1519.11	1597.59	1719.74	0.318662	0.099392	3.20611	0.00134544	0.0154122
chr5S:30636780-30672041	NM_001091595	MGC80198	3245.94	5888.99	3199.05	3731.43	2348.24	1912.75	2395.16	-0.637226	0.198806	-3.20526	0.0013494	0.0154375
chr8L:21416291-21425429	NM_001091266	igbp1.L	535.66	473.343	448.688	475.111	585.611	621.395	609.814	0.35182	0.1098	3.20418	0.00135448	0.0154755
chr4L:8081390-8132165	NM_001093954	pdhx.L	176.203	221.431	188.067	226.905	157.709	130.82	132.288	-0.501524	0.156619	-3.2022	0.00136381	0.0155418
chr2L:33195697-33206439	NM_001093961	pigs.L	132.278	139.851	209.07	146.33	86.9719	106.044	105.4	-0.565344	0.176533	-3.20247	0.00136253	0.0155418
chr5L:68088061-68109033	NM_001096014	adat2.L	92.102	104.888	143.198	106.506	74.216	74.3296	49.4734	-0.606795	0.189646	-3.19962	0.00137607	0.0156612
chr5L:102030416-102042839	NM_001086670	eif4a2.L	1248.56	1187.84	962.294	1138.23	1483.16	1402.35	1317.5	0.331101	0.103521	3.19839	0.00138198	0.0157082
chr1S:3569058-3581610	NM_001127885	cdc25b.S	397.001	392.659	494.512	491.781	337.451	317.14	348.465	-0.411976	0.128825	-3.19795	0.0013841	0.015712
chr9_10L:51080289-51138911	NM_001174029	r3hdm1.L	114.975	141.644	154.654	131.512	91.6104	95.1419	75.2856	-0.555241	0.173815	-3.19443	0.00140108	0.0158843
chr5S:12268835-12270990	NM_001088574	lefty.S	86.0603	110.267	116.468	102.802	55.662	76.3117	54.851	-0.597836	0.18721	-3.19339	0.00140612	0.015921
chr4S:88435439-88449540	NM_001094864	slc25a17.S	299.051	202.605	309.309	201.899	339.77	319.122	421.6	0.500802	0.156943	3.19099	0.00141788	0.0160336
chr8L:81660642-81679101	NM_001097840	fbxo34.L	1426.31	1648.63	1577.09	1516.09	1222.24	1227.92	1365.9	-0.297458	0.0932323	-3.19051	0.00142023	0.0160395
chr1L:153776740-153801624	NM_001096975	hic2.L	286.829	152.402	253.939	264.877	393.113	283.444	373.202	0.525445	0.164766	3.18903	0.0014275	0.016101
chr3L:143990489-144001760	NM_001087805	ybx2.L	1069.87	1261.35	1054.9	1294.75	932.338	995.026	880.842	-0.338339	0.106135	-3.18781	0.00143355	0.0161276
chr2L:125681234-125743531	NM_001092354	scel.L	170.623	108.474	112.649	174.115	213.371	202.177	212.951	0.537409	0.168585	3.18777	0.00143372	0.0161276
chr2S:25035017-25059399	NM_001094471	rcsd1.S	30.4132	8.06834	21.0024	20.3751	51.0235	34.6871	47.3224	0.675844	0.212033	3.18744	0.00143536	0.0161276
chr7L:67449731-67487334	NM_001088548	ddx25.L	1173.25	1050.68	835.324	1114.15	1239.64	1588.67	1211.02	0.390122	0.122414	3.18689	0.0014381	0.0161379
chr1L:100079587-100095474	NM_001096202	mob3a.L	846.378	909.929	1008.12	925.216	750.277	700.68	784.046	-0.325959	0.102318	-3.18575	0.0014438	0.0161812
chr7S:28396726-28427806	NM_001092477	dnajb12.S	544.648	413.278	435.323	543.645	656.348	622.387	596.908	0.390304	0.122597	3.18364	0.00145436	0.0162788
chr8L:22614093-22623246	NM_001092106	snx12.L	1795.84	1482.78	1714.56	1619.82	1959.77	2077.26	1920.86	0.291883	0.0917758	3.1804	0.00147074	0.0164413
chr1S:158643011-158653588	NM_001088520	ccnb1.S	176.546	197.226	513.605	135.217	57.9812	71.3564	83.8897	-0.637427	0.200547	-3.17844	0.00148071	0.0165318
chr6L:54596093-54600948	NM_001171658	sec61g.L	2600.74	2406.16	2134.61	2475.58	2810.93	2895.88	2881.29	0.278548	0.0876748	3.17706	0.00148777	0.0165896
chr4S:94589645-94626069	NM_001099902	sgsm3.S	790.82	656.225	528.88	815.005	916.104	854.295	974.411	0.409281	0.128854	3.17631	0.00149161	0.0166114
chr9_10L:114679112-114682432	NM_001093287	cldn6.1.L	1442.94	1691.66	2059.19	1274.37	1084.25	1183.33	1364.82	-0.417612	0.131501	-3.17574	0.00149455	0.0166231
chr7S:48300043-48321316	NM_001094721	siae.S	246.688	260.876	365.633	260.246	176.263	204.159	212.951	-0.487904	0.153689	-3.17461	0.0015004	0.0166671
chr2S:83621580-83653741	NM_001087337	ube2g1.S	1417	1727.52	1525.54	1480.9	1171.22	1306.22	1290.61	-0.310422	0.0978191	-3.17343	0.0015065	0.0167138
chr3L:48212943-48216838	NM_001085911	btg1.L	15290.1	13576.3	13155.2	14584.9	16349.6	15568.6	18506.3	0.274857	0.0866477	3.17212	0.00151329	0.016768
chr5L:68923469-68974533	NM_001095164	pcmt1.L	333.328	393.556	369.452	393.61	256.277	279.479	307.596	-0.408397	0.12877	-3.17152	0.00151646	0.016782
chr8L:43728963-43739548	NM_001135068	tmlhe.L	42.9269	81.5799	41.0502	59.2731	18.554	36.6693	20.4347	-0.670691	0.211525	-3.17074	0.00152051	0.0168057
chr1S:18726282-18762664	NM_001095805	tapt1.S	133.612	164.953	203.342	137.069	68.4179	114.963	112.928	-0.577905	0.182353	-3.16916	0.00152879	0.0168761
chr3L:47125835-47162156	NM_001086656	kitlg.L	894.22	799.662	678.761	849.272	914.944	1026.74	1095.94	0.355181	0.112141	3.16728	0.00153874	0.0169647
chr3S:88293017-88311809	NM_001096704	sane	808.781	885.724	927.926	896.505	741	730.412	671.118	-0.31874	0.10072	-3.16461	0.00155293	0.0170997
chr7L:93695498-93697058	NM_001088237	hes9.1.L	252.133	167.642	205.251	238.018	284.108	272.542	345.238	0.478331	0.151195	3.16366	0.00155797	0.0171338
chr8S:12328600-12341830	NM_001087064	wars.S	372.1	545.061	342.722	436.213	309.62	329.032	269.953	-0.466854	0.147645	-3.16199	0.00156693	0.0172108
chr3L:47478834-47484050	NM_001089787	dusp6.L	406.723	435.69	501.195	460.292	346.728	333.988	362.447	-0.383635	0.121351	-3.16137	0.00157031	0.0172131
chr4L:130473005-130506121	NM_001089883	rab7a.L	579.232	666.086	699.763	601.066	482.404	504.45	521.622	-0.353672	0.111878	-3.16123	0.00157105	0.0172131
chr8L:117577308-117587984	NM_001127843	rab13.L	906.56	818.488	818.141	777.959	965.967	1031.69	1027.11	0.307304	0.0972319	3.16053	0.00157485	0.0172333
chr3S:15293774-15298832	NM_001086766	rps14.L	1992.15	1845.86	1545.59	1908.78	2126.75	2332.96	2192.96	0.309334	0.0981495	3.15166	0.00162343	0.0177429
chr5S:97118268-97124261	NM_001086259	ssr3.S	1428.6	1345.62	1207.64	1229.92	1407.78	1650.12	1730.49	0.319569	0.101415	3.1511	0.00162659	0.0177555
chr7L:108591064-108594007	NM_001086183	MGC53066	1519.12	2087.01	1358.48	1858.77	1480.84	1299.28	1030.34	-0.42354	0.134483	-3.1494	0.00163605	0.0177925
chr6S:55743000-55830996	NM_001094814	tex10.S	807.776	991.509	890.694	847.42	689.977	658.065	768.989	-0.341351	0.108374	-3.14974	0.00163415	0.0177925
chr1S:116758236-116760583	NM_001171790	nop10.S	2323.73	2139.01	2059.19	2111.6	2415.5	2615.41	2601.66	0.263615	0.083703	3.14941	0.00163601	0.0177925
chr6L:91668070-91678425	NM_001087526	rbm24.L	1828.48	2069.08	1275.42	1227.14	2152.26	2173.4	2073.58	0.42842	0.136148	3.14671	0.00165116	0.0179347
chr2S:28971498-28980329	NM_001092422	mab21l3.S	271.313	191.847	145.108	295.439	329.333	335.97	330.181	0.527338	0.167728	3.144	0.00166655	0.0180208
chr2S:94157076-94203452	NM_001093113	gas6.S	45.7466	36.7558	24.8211	26.8581	63.7794	54.5084	67.7571	0.650539	0.206857	3.14487	0.0016616	0.0180208
chr4L:3862199-3880477	NM_001095550	nat1	20147.5	18618.1	18741.8	18256.1	22130.3	21873.7	21265	0.224179	0.0712918	3.14453	0.00166353	0.0180208
chr6L:115366106-115415322	NM_001095840	atp6v1h.L	256.192	306.597	310.263	284.326	186.7	218.033	231.234	-0.439314	0.139736	-3.14388	0.00166726	0.0180208
chr4L:24932887-24949116	NM_001086024	fkbp2.L	348.592	433.897	367.543	405.65	316.578	277.497	290.387	-0.404146	0.128595	-3.14277	0.00167359	0.0180449
chr2S:74374753-74383608	NM_001093471	hpca.S	33.4977	47.5136	57.2794	37.0457	19.7136	16.848	22.5857	-0.665262	0.211674	-3.14287	0.00167302	0.0180449
chr4S:67598809-67605427	NM_001087797	ccnb1.2.S	3465.12	3321.47	2991.89	3112.76	3664.41	3791.8	3908.4	0.259167	0.082543	3.13978	0.00169076	0.0182077
chr1S:168780981-168788029	NM_001091095	sub1.S	1644.6	1445.13	1484.49	1491.09	1706.97	1774.99	1964.96	0.286656	0.09132	3.13903	0.00169508	0.018232
chr2S:97579748-97598726	NM_001093910	lamp1.S	869.894	1073.09	1106.45	802.965	694.615	782.938	759.309	-0.37788	0.120442	-3.13744	0.00170432	0.0182998
chr9_10S:15978887-15990064	NM_001095503	deptor.L	2217.76	1900.54	2063.97	2056.03	2400.42	2466.75	2418.82	0.264114	0.084187	3.13723	0.00170555	0.0182998
chr9_10S:2315590-2326095	NM_001097129	pip4k2a.S	699.447	776.353	811.458	760.362	611.122	637.252	600.134	-0.32307	0.103051	-3.13506	0.00171819	0.0184131
chr1L:196082105-196261164	NM_001092935	arl15.L	178.021	236.671	196.659	205.603	134.516	151.632	143.043	-0.483339	0.154251	-3.13346	0.00172759	0.0184913
chr9_10S:76085294-76115751	NM_001090681	sf3b1.S	8817.95	7297.36	8061.12	8568.66	9791.87	9207.95	9980.73	0.264967	0.0845757	3.1329	0.0017309	0.0185043
chr4L:121866942-121885928	NM_001095376	parp3.L	62.5137	52.8924	126.015	76.8698	49.8639	30.7229	38.7183	-0.652069	0.208279	-3.13075	0.0017436	0.0186174
chr9_10L:70861038-70875555	NM_001086287	nup35.L	2428.78	2088.8	2189.98	2316.28	2611.48	2708.57	2657.58	0.26345	0.084195	3.12905	0.00175375	0.0186675
chr5L:79376888-79388525	NM_001086400	sesn1.L	84.6966	95.0271	151.79	83.3528	63.7794	60.4547	53.7755	-0.613623	0.196092	-3.12926	0.00175244	0.0186675
chr2L:76859234-76878345	NM_001086814	ddx3x.L	6286.93	5785	5856.82	5592.97	6742.06	7134.65	6610.08	0.240947	0.0770071	3.1289	0.00175464	0.0186675
chr3L:2764475-2794009	NM_001095961	fbln1.L	627.553	544.165	577.567	502.895	804.78	642.208	693.703	0.364342	0.116541	3.12631	0.00177017	0.0188099
chr3L:144023980-144032551	NM_001088098	tp53.L	3122.92	3126.03	4268.27	3199.82	2742.51	2464.77	2936.14	-0.350758	0.112399	-3.12066	0.00180449	0.0191515
chr3L:79799722-79818602	NM_001094379	ncaph2.L	455.381	529.821	561.338	468.628	401.23	402.371	368.9	-0.375268	0.120358	-3.11793	0.00182127	0.0193063
chr7S:86750250-86772155	NM_001096789	emc1.S	1659.22	1373.41	1537	1542.03	1870.47	1913.74	1718.66	0.290301	0.0931345	3.11701	0.00182694	0.0193432
chr1S:90255307-90257293	NM_001093875	LOC100145037.L	12.4093	43.0311	8.59191	13.8921	4.6385	0	4.30204	-0.556541	0.178609	-3.11598	0.00183335	0.0193877
chr4L:16143184-16194783	NM_001127789	lsp1.L	231.614	156.884	209.07	196.342	272.512	240.828	314.049	0.473182	0.151886	3.11538	0.00183708	0.0194038
chr7S:22336232-22351782	NM_001088566	ddx21.S	16327.8	14565.1	14557.6	15681.4	17520.8	17149.3	18492.3	0.238453	0.0765536	3.11486	0.00184034	0.019415
chr1S:111402851-111413855	NM_001091870	abraxas1.S	187.614	196.33	285.442	200.973	135.676	142.713	164.553	-0.509506	0.163641	-3.11355	0.0018485	0.0194778
chr8S:93555718-93567109	NM_001095587	aph1a.L	1971.74	1778.62	1787.12	1800.42	2202.13	2121.86	2140.26	0.257806	0.0828817	3.11053	0.00186754	0.0196549
chr3L:99394203-99396580	NM_001088172	mespa.L	212.121	169.435	141.289	200.047	255.117	223.98	282.859	0.483564	0.15553	3.10914	0.00187631	0.0197236
chr1L:116907087-116913544	NM_001086702	rps6.L	3620.69	3542	2954.66	3225.75	3679.49	4178.31	4143.94	0.288578	0.0929306	3.1053	0.00190084	0.0199483
chr9_10S:30395505-30411537	NM_001092881	MGC81970	10759.1	9781.52	9643.94	10060.7	11282	11328.8	12457.6	0.241433	0.0777627	3.10474	0.00190448	0.0199483
chr3S:119139509-119161981	NM_001095559	pin1.S	493.826	607.815	570.885	511.23	386.155	434.085	452.789	-0.372305	0.119908	-3.10491	0.00190336	0.0199483
chr7L:23585611-23610296	NM_001094779	mfsd13a.L	137.077	89.6482	109.785	121.325	172.784	153.615	175.308	0.520214	0.167601	3.10388	0.00191003	0.0199827
chr9_10L:5168173-5178209	NM_001101787	ubtf.L	5276.63	4892.1	4758.96	4818.72	5800.44	5920.6	5468.96	0.239995	0.0773302	3.10351	0.00191238	0.0199836
chr2L:10891566-10897625	NM_001171808	hmgn1.L	40124.1	37944.5	35786.2	37064.2	42637.1	42981.3	44331.4	0.223245	0.0719415	3.10315	0.00191473	0.0199844
chr2L:138237095-138260191	NM_001093112	coq10a.L	282.185	224.121	227.208	249.132	387.315	292.363	312.973	0.437627	0.14111	3.10131	0.00192665	0.0200139
chr2S:117357619-117382993	NM_001094040	sucla2.S	554.523	658.914	629.119	591.805	468.488	516.343	462.469	-0.348094	0.112221	-3.10186	0.00192308	0.0200139
chr4L:102752660-102765234	NM_001094939	atp6v1g3.L	25.7786	1.79296	4.77328	25.0058	52.1831	38.6514	32.2653	0.620547	0.200072	3.10162	0.00192466	0.0200139
chr7S:10183368-10200776	NM_001095327	htra1.S	676.243	574.645	549.882	646.447	715.489	761.135	809.858	0.341969	0.110231	3.10229	0.00192032	0.0200139
chr1L:60106741-60111779	NM_001087363	rpl34.L	1145.96	1020.2	837.234	1139.15	1346.32	1261.62	1271.25	0.344455	0.111113	3.10003	0.00193499	0.0200769
chr2L:87806796-87856095	NM_001095727	clic5.L	51.8339	109.371	42.0049	67.6084	42.9061	16.848	32.2653	-0.656532	0.211861	-3.09888	0.00194257	0.0201319
chr9_10S:63351-72548	NM_001086508	asxl1.S	3506.57	3153.82	3158.96	3288.73	3918.37	3741.26	3778.26	0.243416	0.0785686	3.09813	0.00194744	0.0201586
chr4L:36590034-36608781	NM_001087406	cnep1r1.S	349.96	418.657	489.739	326.928	262.075	289.39	312.973	-0.445799	0.144005	-3.09571	0.0019634	0.0202832
chr1L:161696226-161713894	NM_001088777	kmt5a.L	401.075	421.347	514.56	443.622	340.93	342.907	343.087	-0.384949	0.124353	-3.09561	0.00196408	0.0202832
chr9_10S:65752784-65760431	NM_001088200	ag1.S	1908.29	999.578	1235.33	1748.56	2791.22	1907.79	2767.29	0.613491	0.198329	3.0933	0.00197944	0.020394
chr8S:78921328-78938468	NM_001092027	cratb.S	757.642	622.159	720.766	641.816	858.122	928.624	774.367	0.341594	0.110429	3.09335	0.00197913	0.020394
chr3L:31176796-31195265	NM_001094251	ccni2.L	623.149	504.719	573.748	560.316	710.85	697.707	691.552	0.333239	0.107778	3.09189	0.00198883	0.0204669
chr9_10S:8373946-8415649	NM_001177440	zmynd8.S	618.802	522.649	540.336	567.725	717.808	687.797	676.495	0.328596	0.106419	3.08776	0.00201671	0.0207295
chr3S:88292956-88312097	NM_001089109	lemd3.S	925.976	1005.85	1069.22	1007.64	844.207	838.438	790.499	-0.30012	0.0972136	-3.08722	0.00202038	0.0207431
chr9_10S:19920535-19940995	NM_001091399	cdc42ep4.S	831.137	921.584	855.372	1029.87	663.305	779.965	736.724	-0.337707	0.109592	-3.08151	0.00205954	0.0209983
chr9_10L:23623077-23633179	NM_001092205	arhgdia.L	273.489	341.56	332.22	294.513	177.423	246.774	248.443	-0.450945	0.146331	-3.08168	0.00205833	0.0209983
chr9_10L:41936548-41942206	NM_001094803	mfsd6l.L	407.897	321.837	317.901	400.093	495.16	462.826	449.563	0.392663	0.127418	3.08169	0.0020583	0.0209983
chr9_10L:106032460-106095376	NM_001095168	crebbp.L	1050.5	880.345	953.702	978.006	1139.91	1199.18	1151.87	0.295543	0.0958862	3.08223	0.00205458	0.0209983
chr2L:68630019-68631460	NM_001096920	yod1.L	250.364	282.392	301.671	293.587	189.019	227.944	207.573	-0.428867	0.139129	-3.08251	0.0020526	0.0209983
chr1L:53961904-53972496	NM_001114792	LOC733556.L	42.315	50.203	105.012	28.7104	19.7136	28.7408	21.5102	-0.653347	0.211993	-3.08192	0.00205668	0.0209983
chr4L:126051590-126058773	NM_001093837	rpl32.L	1624.65	1409.27	1288.79	1612.41	1890.19	1675.88	1871.39	0.314094	0.101959	3.08059	0.0020659	0.0210387
chr1L:162103293-162118284	NM_001086677	vps37b.L	1118.25	1330.38	1173.27	1213.25	985.681	984.124	1022.81	-0.295936	0.0960916	-3.07973	0.00207192	0.0210756
chr4S:1385628-1404638	NM_001092308	kmt5b.S	419.655	302.114	366.588	401.946	474.287	483.638	489.357	0.391931	0.127278	3.07934	0.00207458	0.0210785
chr1L:151700114-151705578	NM_001095146	pik3ip1.L	195.417	169.435	284.488	260.246	146.113	147.668	164.553	-0.515331	0.167441	-3.07768	0.00208617	0.0211717
chr8S:27052274-27057346	NM_001086653	rpl12.S	4012.29	3486.42	3027.22	4119.48	4652.41	4263.55	4524.67	0.316683	0.102919	3.07702	0.00209081	0.0211865
chr2L:99854117-99858893	NM_001093723	rpl24.L	1467.2	1436.16	1091.17	1347.54	1657.1	1659.04	1612.19	0.323812	0.105255	3.07647	0.00209469	0.0211865
chr1L:173613368-173623369	NM_001093965	tmed7.L	2810.48	2510.15	1956.09	2853.44	2945.45	3148.6	3449.16	0.352378	0.114542	3.0764	0.00209517	0.0211865
chr5S:81873753-81884837	NM_001123359	eif4g1.S	4106.5	3680.06	3335.57	4063.91	4668.65	4548.97	4341.83	0.277492	0.0902088	3.0761	0.00209725	0.0211865
chr8L:14073413-14076575	NM_001086817	tsc22d3.L	473.303	424.933	659.668	581.617	401.23	338.943	433.43	-0.439592	0.143149	-3.07087	0.00213433	0.0215365
chr8S:88342300-88418156	NM_001096957	fut8.S	151.904	199.019	169.929	183.376	98.5681	135.775	124.759	-0.504332	0.164415	-3.06743	0.00215905	0.021761
chr5S:35269339-35283413	NM_001087509	tcp1.S	1779.05	1806.41	1432.94	1483.68	1935.41	2096.09	1919.78	0.312898	0.102032	3.06666	0.00216462	0.0217922
chr1L:50516686-50536091	NM_001096961	prmt9.L	176.61	206.191	193.795	231.535	135.676	139.74	152.722	-0.472748	0.154181	-3.06619	0.00216804	0.0218016
chr2S:33858263-33883762	NM_001096885	rilp.S	37.0026	64.5467	49.6421	39.8241	26.6714	19.8212	21.5102	-0.646687	0.211001	-3.06485	0.0021778	0.0218749
chr3L:132395547-132407496	NM_001087296	calr	20378.1	16300.7	17312.7	21000.3	21557.4	23728	22369.5	0.292443	0.0954645	3.06337	0.00218859	0.0219332
chr3L:42005092-42020951	NM_001096441	parpbp.L	403.154	412.382	540.336	441.77	329.333	336.961	358.145	-0.397714	0.129828	-3.06338	0.0021885	0.0219332
chr1L:152734895-152740209	NM_001094566	ddt.L	540.062	374.73	551.791	446.4	593.728	627.342	646.381	0.39816	0.130016	3.0624	0.00219571	0.0219796
chr9_10L:70311006-70312267	NM_001085794	neurod1.L	47.283	30.4804	65.8713	108.359	31.3099	33.6961	13.9816	-0.648939	0.212029	-3.06062	0.00220878	0.0220829
chr6S:2744410-2747512	NM_001092380	ndufb10.S	554.968	476.928	469.691	512.156	615.761	629.324	625.946	0.333657	0.109027	3.06032	0.00221104	0.0220829
chr5L:123091148-123123641	NM_001087110	farsb.L	748.329	862.416	763.725	894.653	707.371	628.333	633.475	-0.332066	0.108552	-3.05904	0.00222045	0.0221517
chr4L:21544409-21551890	NM_001096852	rplp2.L	1393.68	1203.08	1132.22	1378.1	1566.65	1468.75	1613.26	0.304782	0.0997623	3.05509	0.00224996	0.0223988
chr1L:47085206-47133281	NM_001135083	map9.L	159.258	103.992	119.332	144.478	178.582	158.57	250.594	0.531367	0.173931	3.05504	0.0022503	0.0223988
chr4S:15763058-15777495	NM_001096551	MGC115301	294.597	353.214	389.5	288.956	238.883	250.739	246.292	-0.426531	0.139649	-3.05432	0.00225574	0.0224275
chr3L:132990565-133027456	NM_001091340	hook2.L	1026.16	1233.56	1197.14	1044.69	829.132	815.643	1036.79	-0.345385	0.113132	-3.05295	0.00226604	0.0225046
chr9_10S:2882673-2886788	NM_001092810	cbx1.S	1249.95	1171.7	993.797	1171.57	1398.51	1349.83	1414.29	0.300367	0.0983981	3.05257	0.00226894	0.022508
chr6L:48216563-48234958	NM_001086686	dync1li1.L	149.638	184.675	182.339	172.262	113.643	129.829	115.079	-0.486931	0.159615	-3.05065	0.00228343	0.0226263
chr8L:75048012-75108435	NM_001095492	ppp1r13b.L	176.903	261.773	200.478	177.819	136.836	144.695	139.816	-0.495478	0.162523	-3.04866	0.00229861	0.0227511
chr6L:89128585-89168124	NM_001094095	elovl2.L	24.3362	3.58593	2.86397	23.1535	57.9812	33.6961	24.7367	0.605512	0.198696	3.04743	0.00230809	0.0227924
chr8L:1512964-1520139	NM_001094183	prpf4.L	4958.69	4709.22	4332.23	4551.99	5570.84	5332.9	5254.94	0.240345	0.0788759	3.04712	0.00231044	0.0227924
chr8L:60511825-60531131	NM_001095827	vipas39.L	246.433	208.88	199.523	210.234	278.31	305.247	276.406	0.419045	0.137522	3.04711	0.00231055	0.0227924
chr3L:79863322-79871372	NM_001085901	odf3.L	41.989	25.998	16.2292	35.1934	42.9061	58.4726	73.1346	0.642581	0.211026	3.04503	0.00232658	0.0228758
chr5L:99925365-99975028	NM_001090242	tprg1.L	252.231	328.112	272.077	286.178	230.765	209.114	187.139	-0.435384	0.142968	-3.04532	0.00232432	0.0228758
chr1S:124979504-125002406	NM_001090571	msi1.S	1538.76	1267.63	1380.43	1471.64	1839.16	1655.07	1618.64	0.294269	0.096672	3.044	0.00233458	0.0228758
chr6S:15970936-16002642	NM_001090862	itgb1.S	1938.71	2346.09	2106.93	1986.57	1867	1613.45	1712.21	-0.294	0.0965768	-3.0442	0.00233296	0.0228758
chr8S:96633193-96645422	NM_001091119	MGC81163	406.217	346.042	293.08	389.906	483.564	419.219	505.489	0.402345	0.132158	3.04442	0.00233127	0.0228758
chr4L:16229674-16246496	NM_001094138	syt1.L	1596.56	1351.89	1094.99	1680.02	1745.24	1893.92	1813.31	0.366404	0.120341	3.04471	0.00232908	0.0228758
chr4S:52241274-52248670	NM_001086262	ctbs.S	1090.19	953.857	894.513	1040.06	1110.92	1333.97	1207.8	0.317365	0.10428	3.04338	0.00233933	0.0228968
chr8L:38209511-38212549	NM_001087026	slc25a5.L	28593.7	25015.4	23663.1	28750.2	33236	29989.5	30908	0.268997	0.0884151	3.04243	0.00234674	0.0229415
chr5L:93594171-93669616	NM_001088967	lmbrd1.L	195.13	260.876	231.982	201.899	153.07	160.552	162.402	-0.462687	0.152093	-3.04213	0.0023491	0.0229415
chr1S:107200618-107208286	NM_001086200	rfk.S	343.334	306.597	261.576	305.627	403.549	420.21	362.447	0.394718	0.129836	3.04013	0.00236478	0.023069
chr4L:112830816-112841613	NM_001090713	tob2.L	231.732	282.392	319.81	224.126	180.901	173.436	209.724	-0.465833	0.153266	-3.03937	0.00237071	0.0231013
chr1S:169564232-169568893	NM_001088218	rax.S	170.205	41.2382	33.413	133.364	265.554	300.292	247.367	0.601853	0.198207	3.03649	0.00239352	0.0232978
chr6S:32521357-32561073	NM_001091314	mpp6.S	270.173	291.357	429.595	252.837	202.934	213.078	231.234	-0.48668	0.160319	-3.03569	0.00239984	0.0233336
chr7L:75093008-75101506	NM_001095099	pafah1b2.L	111.859	139.851	120.287	153.74	90.4507	74.3296	92.4938	-0.535175	0.176336	-3.03497	0.00240556	0.0233633
chr7L:104152639-104194626	NM_001092424	bcam.L	126.909	112.06	61.098	112.063	166.986	144.695	164.553	0.554477	0.183047	3.02915	0.00245245	0.0237926
chr1S:144071622-144094411	NM_001091861	cdo1.S	483.175	589.885	578.522	485.298	381.517	414.264	449.563	-0.371072	0.12261	-3.02644	0.00247456	0.0239572
chr9_10S:16718251-16746296	NM_001093696	zbtb46.S	439.583	305.7	418.139	388.053	574.014	469.763	481.828	0.404956	0.133808	3.0264	0.00247486	0.0239572
chr1L:24453913-24485461	NM_001091109	anapc4.L	244.49	275.22	315.991	264.877	197.136	206.141	207.573	-0.425101	0.140519	-3.02522	0.00248449	0.024024
chr1L:60609165-60667492	NM_001094368	mcub.L	834.499	698.36	828.642	670.527	885.953	953.401	970.109	0.329811	0.109068	3.0239	0.0024954	0.024103
chr4S:102454468-102467283	NM_001090141	MGC68797	89.8882	42.1347	99.2843	37.0457	155.39	112.981	92.4938	0.623968	0.206395	3.02317	0.0025014	0.0241345
chr3S:46956330-46960237	NM_001097747	mex3b.S	1458.69	1585.88	1625.78	1612.41	1347.48	1383.52	1197.04	-0.281268	0.0930724	-3.02203	0.00251084	0.0241991
chr4S:7673060-7701339	NM_001089081	LOC398557	566.183	688.498	681.625	558.464	495.16	517.334	456.016	-0.359175	0.118875	-3.02146	0.00251562	0.0242187
chr4S:87695460-87716193	NM_001086744	luc7l2.S	2594.72	2426.78	2275.9	2362.59	2958.2	2668.93	2875.91	0.255812	0.0847022	3.02014	0.00252659	0.0242978
chr8L:100513613-100520937	NM_001112888	LOC100127334	37.8873	69.9256	40.0956	47.2332	25.5117	19.8212	24.7367	-0.637264	0.211096	-3.01884	0.00253748	0.0243759
chr3L:5233064-5261238	NM_001127871	caprin2.L	1519.29	1443.34	1932.22	1760.6	1482	1246.76	1250.82	-0.340208	0.112712	-3.01838	0.0025413	0.0243859
chr1L:168570725-168596531	NM_001096974	slc27a6.L	932.778	1131.36	1000.48	982.636	859.282	833.483	789.424	-0.307606	0.101925	-3.01796	0.00254485	0.0243935
chr9_10L:77554480-77575275	NM_001086079	cyp20a1.L	370.023	335.284	261.576	336.189	388.474	485.62	412.996	0.410617	0.136143	3.01607	0.00256071	0.0244656
chr8L:19577367-19586332	NM_001088132	ssr4.L	1224.39	1096.4	1084.49	1089.14	1203.69	1427.13	1445.48	0.299975	0.0994479	3.0164	0.00255794	0.0244656
chr1S:52483642-52514416	NM_001096110	larp1b.S	292.179	349.628	378.044	300.996	234.244	205.15	285.01	-0.438016	0.145206	-3.01651	0.00255699	0.0244656
chr1L:7376692-7391106	NM_001094950	LOC495278	1715.75	1518.64	1574.23	1529.99	1912.22	2038.61	1720.81	0.28031	0.0929881	3.01448	0.00257424	0.0245682
chr3L:125369943-125374619	NM_001087967	nodal2.L	16.5842	9.8613	78.2818	1.85228	2.31925	3.96425	3.22653	-0.508111	0.168586	-3.01395	0.00257869	0.0245841
chr1L:95865584-95880163	NM_001095508	sgta.L	589.158	715.393	665.395	611.254	488.202	547.066	507.64	-0.33979	0.112793	-3.01251	0.00259101	0.0246748
chr5L:19913785-19963741	NM_001093991	MGC86483	8.82299	13.4472	12.4105	20.3751	4.6385	0.991061	1.07551	-0.537165	0.178378	-3.01139	0.00260057	0.0247391
chr8S:9959786-9996700	NM_001091093	inf2.S	95.4013	101.302	145.108	115.768	82.3334	51.5352	76.3612	-0.570422	0.189503	-3.0101	0.00261158	0.0248171
chr4S:101247267-101252829	NM_001093841	rpl29.S	1307.45	1098.19	1039.62	1329.01	1505.19	1439.02	1433.65	0.31457	0.104554	3.00868	0.00262388	0.0248803
chr2L:32762261-32771766	NM_001094507	dhrs13.L	153.265	189.158	219.571	153.74	114.803	97.124	145.194	-0.518962	0.172487	-3.0087	0.00262372	0.0248803
chr4S:86507668-86510248	NM_001094930	snu13.S	4868.66	4384.69	4170.89	4756.66	5218.31	5282.36	5399.06	0.246309	0.0818953	3.00761	0.00263314	0.0249412
chr3S:88564487-88570117	NM_001086052	LOC646644.S	2113.64	1922.95	1809.07	1996.76	2169.66	2365.66	2417.74	0.266777	0.0887327	3.00652	0.00264253	0.0250033
chr6L:44472058-44477454	NM_001087297	rpl15.L	3216.89	3022.94	2584.25	3092.39	3435.97	3626.29	3539.5	0.271684	0.0903816	3.00596	0.00264741	0.0250226
chr8L:50584723-50590670	NM_001127819	slc39a7.L	2123.01	1993.78	1710.74	2017.14	2432.89	2326.02	2257.49	0.279186	0.0929072	3.005	0.00265581	0.0250751
chr8L:85687902-85704932	NM_001093253	brms1l.L	498.617	571.059	551.791	560.316	422.103	451.924	434.506	-0.335555	0.111708	-3.00386	0.00266578	0.0251422
chr9_10L:53075994-53085782	NM_001137567	mcm6.2.L	1540.92	1438.85	1344.16	1391.07	1759.15	1694.71	1617.57	0.2677	0.0891345	3.00333	0.00267046	0.0251594
chr5S:82530520-82603449	NM_001096178	MGC114631	2526.93	2197.28	2334.13	2358.88	2742.51	2883	2645.75	0.252899	0.0842597	3.00143	0.00268718	0.02529
chr5L:151083229-151094453	NM_001086941	ctsb.L	7851.42	8873.38	8680.69	8054.66	6820.91	7114.83	7564.06	-0.242736	0.0809431	-2.99885	0.00271004	0.0254507
chr9_10L:76366731-76419101	NM_001095092	adarb1.L	330.879	401.624	430.55	320.445	262.075	296.327	274.255	-0.412215	0.137452	-2.99898	0.00270889	0.0254507
chr2L:26022032-26109163	NM_001093277	usp25.L	974.291	805.041	987.115	725.169	970.606	1258.65	1099.17	0.366939	0.122422	2.99732	0.00272364	0.0255512
chr1L:38661637-38675708	NM_001091156	dctd.L	522.118	701.049	619.572	495.486	372.24	441.022	503.338	-0.409044	0.13655	-2.99557	0.00273934	0.0256711
chr8S:98803386-98811687	NM_001086190	f11r.S	3125.79	3966.93	3126.5	3295.21	2694.97	2941.47	2729.64	-0.294556	0.0983543	-2.99485	0.00274581	0.0256889
chr9_10S:96376692-96463368	NM_001090246	slc9a3r2.S	249.46	197.226	209.07	220.422	287.587	270.56	311.898	0.41543	0.138721	2.99471	0.00274707	0.0256889
chr7L:54537635-54565962	NM_001086746	ndufv1.L	1674.88	1393.13	1555.14	1583.7	1826.41	1871.12	1819.76	0.270527	0.09039	2.99288	0.00276355	0.0257609
chr7L:93658081-93659392	NM_001088694	hes3.3.L	183.748	112.06	105.012	201.899	192.498	232.899	258.122	0.539581	0.180272	2.99314	0.00276121	0.0257609
chr6L:106050108-106059441	NM_001097947	zbtb14.L	174.245	140.748	137.471	149.109	207.573	205.15	205.422	0.452818	0.151272	2.9934	0.00275887	0.0257609
chr6L:132796700-132805459	NM_001095189	klf10.L	268.012	276.116	317.901	348.229	191.338	224.971	249.518	-0.43242	0.144526	-2.99198	0.00277173	0.0258099
chr7L:85929801-85946975	NM_001094692	cdk11b.L	1251.56	1498.02	1272.56	1413.29	1105.12	1003.95	1216.4	-0.310578	0.103908	-2.98896	0.00279928	0.0260311
chr2L:156994800-157241721	NM_001112890	b3glct.L	366.825	225.913	364.679	319.519	432.54	453.906	404.391	0.43614	0.145928	2.98873	0.00280139	0.0260311
chr3L:121642410-121650182	NM_001093716	mak16.L	2185.7	2190.11	1608.6	1979.17	2352.88	2365.66	2617.79	0.320661	0.107315	2.98802	0.00280788	0.0260639
chr9_10L:23675440-23683950	NM_001090536	p4hb.L	15001.2	13497.4	12533.7	14818.3	15874.1	15876.8	17407.1	0.255749	0.0856015	2.98767	0.0028111	0.0260663
chr6L:39572368-39574665	NM_001085719	hoxa1.L	256.931	195.433	160.382	265.803	339.77	284.435	295.765	0.470821	0.157657	2.98636	0.00282317	0.0261237
chr7S:56227503-56370463	NM_001087827	ncam1.S	102.3	60.0643	88.783	83.3528	132.197	114.963	134.439	0.542936	0.181821	2.98609	0.00282566	0.0261237
chr2L:132651857-132668006	NM_001094760	elf1.L	987.236	681.326	815.277	1044.69	1081.93	1139.72	1160.47	0.373116	0.124953	2.98604	0.00282618	0.0261237
chr7L:3820496-3833958	NM_001086003	MGC52890	71.2264	45.7206	45.8235	61.1254	98.5681	104.061	72.0591	0.584843	0.196104	2.98231	0.00286086	0.0264164
chr8S:47178165-47189664	NM_001097003	rps4x.S	3198.84	3023.83	2458.24	3102.58	3411.62	3590.62	3606.18	0.288522	0.0967841	2.98108	0.0028723	0.0264943
chr5L:128468846-128483552	NM_001091654	rnf168.L	567.747	554.922	800.957	617.737	555.46	456.879	420.524	-0.407878	0.136855	-2.98037	0.002879	0.0265284
chr6S:107582856-107618165	NM_001096780	ptdss1.S	653.237	853.451	661.577	706.646	519.512	586.708	591.53	-0.354401	0.118997	-2.97824	0.00289913	0.0266859
chr7L:104356302-104371236	NM_001087140	tomm40.L	1446.2	1794.76	1429.12	1603.15	1272.11	1362.71	1215.33	-0.305799	0.102755	-2.97599	0.00292048	0.0267706
chr1S:17046325-17055860	NM_001092287	lyar.S	3330.18	3169.06	2782.82	3121.1	3587.88	3555.93	3764.28	0.254378	0.0854704	2.97621	0.00291839	0.0267706
chr3L:10326341-10343672	NM_001096098	sirt3.2.L	221.993	182.882	193.795	175.967	231.925	265.604	281.783	0.430395	0.144611	2.97624	0.00291809	0.0267706
chr1S:45209494-45211883	NM_001096770	mab21l2.S	17.0883	17.0332	42.9595	20.3751	4.6385	8.91955	8.60407	-0.600286	0.201662	-2.9767	0.00291372	0.0267706
chr6L:21693885-21714907	NM_001094397	acbd5.L	78.5259	95.9236	116.468	86.1312	62.6197	59.4637	50.5489	-0.567203	0.190665	-2.97486	0.00293118	0.0268407
chr2L:100853657-100892253	NM_001092527	alcam.L	604.03	514.581	512.65	561.242	702.733	714.555	618.418	0.331313	0.111441	2.973	0.00294905	0.0269235
chr4L:4205753-4251302	NM_001095165	usp47.S	671.065	803.248	729.357	722.391	592.568	630.315	548.51	-0.323395	0.108761	-2.97345	0.00294473	0.0269235
chr8L:23411311-23413954	NM_001096084	LOC100490918.L	5912.09	8361.49	5696.43	6091.23	4449.48	5118.83	5755.05	-0.359714	0.120995	-2.97296	0.00294939	0.0269235
chr3L:122701546-122749936	NM_001091570	ppp3cb.L	325.717	400.727	382.817	338.042	285.268	277.497	269.953	-0.38523	0.129595	-2.97257	0.00295318	0.0269301
chr4S:10179537-10199554	NM_001086592	eif3m.S	2328.5	2156.04	1846.31	2272.75	2569.73	2546.04	2580.15	0.279097	0.0939158	2.97178	0.00296081	0.0269719
chr1S:119810098-119844625	NM_001085893	MGC52538	3096.2	4000.1	2963.25	3376.71	2805.13	2604.51	2827.51	-0.307423	0.103529	-2.96943	0.00298351	0.0270403
chr2S:121365261-121370797	NM_001086657	atp5f1b.S	9160.5	7995.72	8674.01	8602.93	9921.75	10000.8	9767.77	0.224801	0.0757167	2.96897	0.00298797	0.0270403
chr9_10L:44545671-44551072	NM_001086661	rpl13a.S	2825.34	2709.17	2124.11	2720.08	3198.25	3115.9	3084.56	0.296584	0.0999053	2.96866	0.00299105	0.0270403
chr2S:46149317-46155750	NM_001086996	rpl8.S	1520.86	1394.03	1203.82	1476.27	1734.8	1698.68	1617.57	0.292177	0.0984075	2.96905	0.0029872	0.0270403
chr9_10L:48836819-48843010	NM_001091221	tmem169.L	85.9698	101.302	167.065	69.4606	52.1831	63.4279	62.3795	-0.599799	0.202011	-2.96914	0.00298634	0.0270403
chr4S:57859755-57896825	NM_001094247	wls.S	490.06	680.43	493.557	522.344	394.272	465.799	383.957	-0.396942	0.133723	-2.96838	0.00299372	0.0270403
chr5L:120108380-120141187	NM_001097089	LOC100493771.L	170.491	182.882	244.392	188.007	118.282	150.641	138.741	-0.484277	0.163028	-2.97051	0.00297303	0.0270403
chr4L:133746835-133772039	NM_001127777	LOC100158331	133.913	92.3377	113.604	107.432	185.54	174.427	130.137	0.511127	0.17218	2.96856	0.00299198	0.0270403
chr3L:119758147-119797720	NM_001127785	loxl2.L	52.6856	21.5156	41.0502	42.6025	81.1737	67.3922	62.3795	0.613481	0.206688	2.96815	0.00299595	0.0270403
chr1S:174095695-174102289	NM_001093152	rpl17.S	2635.38	2264.51	1914.09	2752.49	3041.7	2770.02	3069.5	0.330803	0.111493	2.96704	0.0030068	0.0271104
chr4L:127717248-127745235	NM_001092425	aldh1l1.L	1625.53	1459.47	1080.67	1636.49	1584.05	2016.81	1975.71	0.375918	0.126721	2.9665	0.00301209	0.0271304
chr6L:28048012-28060513	NM_001089814	MGC68508	15.9078	36.7558	12.4105	25.932	6.95775	6.93743	6.45306	-0.594427	0.200412	-2.96603	0.00301675	0.027142
chr1L:152530248-152534019	NM_001091165	sirt4.L	167.852	200.812	234.845	167.632	135.676	134.784	133.363	-0.477593	0.161037	-2.96574	0.00301954	0.027142
chr7S:2081903-2106644	NM_001093583	vwa2.S	41.0063	94.1306	21.9571	61.1254	26.6714	22.7944	19.3592	-0.627378	0.21172	-2.96325	0.0030441	0.0273349
chr4S:91913922-91930172	NM_001096160	tmco1.S	4332.23	3671.99	4060.15	4135.22	4721.99	4736.28	4667.71	0.24175	0.0816239	2.96175	0.00305894	0.0274402
chr8S:44090814-44105377	NM_001087022	naa10.S	743.462	638.295	611.935	711.277	910.305	802.76	786.197	0.323859	0.109389	2.96061	0.0030703	0.0274747
chr1S:85492750-85499682	NM_001090047	polr2e.S	1615.37	1324.1	1590.46	1424.41	1735.96	1888.96	1728.34	0.286813	0.0968825	2.96043	0.00307215	0.0274747
chr5L:148329986-148638648	NM_001093940	supt3h.L	251.726	345.146	266.349	275.99	182.061	228.935	211.875	-0.437493	0.147764	-2.96076	0.00306877	0.0274747
chr9_10L:422906-446725	NM_001086108	stat3.2.L	131.155	166.746	149.881	158.37	99.7277	97.124	115.079	-0.492034	0.166278	-2.9591	0.00308537	0.027541
chr2L:139992346-140000734	NM_001090133	LOC100170425.L	290.226	384.591	292.125	334.337	250.479	250.739	229.083	-0.412172	0.139292	-2.95906	0.00308582	0.027541
chr5S:116037982-116047378	NM_001095867	MGC146443.L	32.3327	42.1347	56.3247	38.898	10.4366	25.7676	20.4347	-0.627287	0.212177	-2.95644	0.00311217	0.0277481
chr2L:95931243-95954879	NM_001094157	asl.L	1408.66	1101.78	1451.08	1039.13	1272.11	1868.15	1719.74	0.389657	0.131863	2.95502	0.00312653	0.027848
chr2L:106755061-106864085	NM_001090677	dmd.1.L	298.378	403.417	286.397	353.786	236.563	248.756	261.349	-0.420761	0.142457	-2.9536	0.00314092	0.0279478
chr4S:7687251-7701335	NM_001091839	ctsd.S	1187.94	1351.89	1455.85	1162.31	1065.7	1098.1	993.771	-0.308698	0.104539	-2.95295	0.00314758	0.0279788
chr9_10S:48282628-48308324	NM_001094993	tmbim1.S	92.3692	109.371	132.697	102.802	66.0986	73.3385	69.9081	-0.540237	0.182976	-2.95251	0.00315206	0.0279904
chr3L:108321365-108327440	NM_001087076	rpl4.L	6773.24	6295.99	5367.08	6691.37	7496.97	7311.06	7476.94	0.266536	0.0903858	2.94887	0.00318934	0.028293
chr2S:155606197-155619478	NM_001091846	rps3.S	1441.48	1395.82	1172.32	1279.93	1444.89	1712.55	1643.38	0.299881	0.101714	2.94828	0.0031955	0.0283191
chr9_10S:21749960-21768887	NM_001092612	chmp6.S	260.958	153.298	266.349	213.939	294.545	330.023	307.596	0.465769	0.158125	2.94557	0.00322359	0.0285393
chr9_10L:29509032-29538685	NM_001092183	tmc6.L	594.671	781.732	599.524	654.782	466.169	580.762	485.055	-0.369807	0.125589	-2.94457	0.00323405	0.0285745
chr9_10L:73682834-73704012	NM_001096631	atic.L	355.571	479.618	354.178	412.133	309.62	336.961	240.914	-0.424235	0.144069	-2.94467	0.00323304	0.0285745
chr1L:111404172-111426672	NM_001096736	gna11.L	1392.67	1645.04	1635.33	1377.17	1113.24	1353.79	1231.46	-0.310066	0.105318	-2.94409	0.00323905	0.02859
chr5S:116074652-116088988	NM_001091033	rps7.S	2277.77	2182.04	1630.55	2216.26	2495.51	2534.14	2608.11	0.317397	0.107906	2.94142	0.00326708	0.0287924
chr9_10S:75955668-75970872	NM_001092721	cavin2.S	55.244	37.6522	27.685	48.1594	81.1737	73.3385	63.455	0.599189	0.203717	2.94129	0.00326852	0.0287924
chr5L:11913666-11948712	NM_001086782	smyd2.S	221.174	165.849	189.022	196.342	248.16	282.452	245.216	0.427464	0.14536	2.94072	0.00327447	0.028816
chr4S:16062200-16126270	NM_001086586	hsd17b12.S	37.4482	67.2362	42.0049	47.2332	15.0751	32.705	20.4347	-0.622517	0.211809	-2.93905	0.00329221	0.0288948
chr1L:173572228-173590328	NM_001090037	cdo1.L	2475.33	3178.03	2530.79	2548.74	2008.47	2310.16	2275.78	-0.303784	0.103362	-2.93903	0.00329238	0.0288948
chr5S:73755626-73757118	NM_001171659	sec61g.S	72901.6	67294.4	60755.3	71469.4	80191.5	75526.8	82172.1	0.243673	0.0829115	2.93895	0.00329327	0.0288948
chr1S:131086076-131089098	NM_001087457	fzd10.S	2167.65	1932.82	1573.27	2224.59	2387.67	2418.19	2469.37	0.319809	0.108833	2.93853	0.00329774	0.0289053
chr9_10L:17477595-17485411	NM_001096856	ppdpf.L	555.576	471.55	441.051	540.867	614.601	662.029	603.361	0.341153	0.116244	2.93481	0.00333756	0.0291962
chr3L:133950057-133964983	NM_001096962	zswim4.L	4941.08	4970.99	6070.66	5260.49	4738.23	4443.92	4162.22	-0.2741	0.0933864	-2.93511	0.00333426	0.0291962
chr4S:10377137-10392829	NM_001095856	depdc7.S	272.617	233.085	219.571	238.945	289.906	312.184	342.012	0.3975	0.135558	2.93232	0.00336442	0.029402
chr9_10L:88855609-88856640	NM_001159688	socs1.L	126.321	108.474	93.5563	98.171	141.474	163.525	152.722	0.491251	0.167607	2.93097	0.003379	0.0295001
chr1S:115115171-115121789	NM_001096213	thtpa.S	40.5457	77.0975	72.5539	24.0797	16.2347	30.7229	22.5857	-0.620427	0.212003	-2.9265	0.00342801	0.0298983
chr3L:133251228-133252338	NM_001170443	ier2.L	811.408	924.273	884.966	889.096	769.991	683.832	716.289	-0.296053	0.101251	-2.92395	0.00345618	0.0301142
chr6S:65339809-65381713	NM_001091967	dusp22.S	65.4379	99.5095	111.695	50.0117	33.6291	51.5352	46.2469	-0.603764	0.206512	-2.92363	0.00345975	0.0301155
chr6L:125707034-125731016	NM_001086611	ca2.L	25.5036	4.48241	5.72794	25.932	46.385	43.6067	26.8877	0.597229	0.20436	2.92244	0.003473	0.030201
chr3S:97204017-97218129	NM_001172178	cdc25c1	382.368	427.622	463.963	411.207	327.014	343.898	320.502	-0.357332	0.122397	-2.91946	0.00350643	0.0304617
chr5L:24265351-24271599	NM_001095013	rpl7l1.L	4584.28	4172.23	3815.76	4521.42	4886.66	5076.22	5033.38	0.250419	0.0858142	2.91815	0.00352116	0.0304994
chr1S:119872090-119884409	NM_001095652	foxn4.S	110.439	74.408	55.3701	113.915	160.028	116.945	141.967	0.557913	0.191186	2.91817	0.00352088	0.0304994
chr3L:45230031-45233064	NM_001101779	myf5.L	940.945	900.068	741.768	827.971	1045.98	929.616	1200.27	0.333559	0.114297	2.91834	0.00351895	0.0304994
chr3S:89680343-89707205	NM_001094367	MGC81536	575.066	512.788	525.061	485.298	618.08	653.109	656.061	0.316069	0.108364	2.91673	0.00353719	0.0306081
chr6S:6996662-7008304	NM_001095786	myd88.S	248.367	286.874	303.581	283.399	252.798	176.409	187.139	-0.433857	0.148791	-2.91589	0.0035468	0.0306612
chr8L:72848541-72854947	NM_001093366	MGC83232	100.106	113.853	166.11	98.171	78.8545	81.267	62.3795	-0.55252	0.189557	-2.91479	0.00355928	0.030739
chr9_10S:61654318-61661879	NM_001087851	hnrnpa3.S	12318.8	11610.3	10763.8	11575.8	12990.1	14032.4	12940.5	0.227068	0.0779287	2.91379	0.00357065	0.030806
chr9_10L:74010638-74045480	NM_001088662	bard1.L	1258.48	966.408	1144.63	1222.51	1449.53	1268.56	1499.26	0.315375	0.108246	2.9135	0.00357404	0.030806
chr1L:138146639-138155573	NM_001095388	ngdn.L	1038.2	934.134	909.788	959.483	1174.7	1147.65	1103.47	0.274105	0.0941031	2.91282	0.00358184	0.030843
chr4S:111859406-111939022	NM_001096415	mtmr14.S	54.3573	91.4412	70.6446	54.6424	35.9484	46.5799	26.8877	-0.601391	0.206505	-2.91224	0.00358852	0.0308704
chr9_10L:2455390-2459054	NM_001086798	rpl19.L	1796.27	1648.63	1395.71	1755.04	2132.55	1859.23	1986.47	0.296906	0.102004	2.91072	0.00360602	0.0309906
chr7S:54749490-54759132	NM_001088118	rpl27a	1078.89	1025.58	823.868	1011.35	1128.31	1201.17	1283.08	0.313236	0.107661	2.90947	0.00362045	0.0310843
chr9_10L:46315061-46328006	NM_001090685	ralb.L	1339.22	1533.88	1474.94	1396.62	1188.62	1188.28	1252.97	-0.265773	0.091507	-2.9044	0.00367954	0.031561
chr5S:99118719-99125551	NM_001086037	selenot.S	2500.15	2348.78	2332.23	2123.64	2556.97	2873.09	2766.21	0.256516	0.088347	2.9035	0.00369016	0.0316212
chr3L:6621780-6642931	NM_001092623	rnf145.L	681.304	777.25	756.088	757.584	633.155	643.199	520.546	-0.32413	0.111653	-2.90302	0.00369578	0.0316386
chr1L:204419987-204469128	NM_001094343	tars.L	3774.77	3480.14	2998.58	3707.35	4410.05	4163.45	3889.04	0.275458	0.0949823	2.9001	0.00373043	0.0319042
chr3L:139457398-139464964	NM_001087748	psmb6.L	1713.76	1541.05	1488.31	1634.64	1796.26	1931.58	1890.75	0.25656	0.0886107	2.89536	0.00378722	0.0323585
chr7L:108682673-108703053	NM_001088596	ruvbl2.L	1065.49	1004.96	713.128	1044.69	1265.15	1123.86	1241.14	0.356679	0.123257	2.89378	0.00380634	0.0324275
chr8L:72848537-72854772	NM_001093631	degs2.L	107.006	120.129	174.702	106.506	85.8122	88.2045	66.6816	-0.541263	0.187018	-2.89417	0.00380159	0.0324275
chr1L:143291204-143298543	NM_001127803	mtfp1.L	312.845	387.28	341.767	352.86	256.277	302.274	236.612	-0.392005	0.135462	-2.89383	0.00380571	0.0324275
chr2L:138742742-138745533	NM_001093435	rps26.L	1392.54	1341.14	1095.95	1296.6	1488.96	1607.5	1525.07	0.289551	0.100108	2.89239	0.00382318	0.0325395
chr8S:78109113-78129414	NM_001094178	ring1.S	168.558	138.058	129.833	143.552	202.934	175.418	221.555	0.453849	0.156942	2.89182	0.00383012	0.0325671
chr4L:53153569-53158662	NM_001090793	foxf1.L	417.89	375.626	324.583	383.423	436.019	500.486	487.206	0.357343	0.123626	2.89051	0.0038462	0.0326409
chr7L:46905370-46922403	NM_001094392	fam213a.L	688.709	808.627	791.41	710.351	561.258	604.547	656.061	-0.317578	0.109869	-2.89051	0.00384613	0.0326409
chr8L:69425974-69430944	NM_001091164	mgat2.L	252.704	167.642	238.664	223.2	302.662	302.274	281.783	0.42577	0.147374	2.88904	0.00386424	0.0327624
chr8L:47404066-47426570	NM_001092097	fam122a.L	1080.4	1013.02	971.84	923.363	1180.5	1127.83	1265.87	0.280692	0.0971842	2.88825	0.00387392	0.0327844
chr8L:38254957-38261824	NM_001127862	nkrf.L	238.499	282.392	293.08	256.541	182.061	219.025	197.894	-0.41111	0.14234	-2.88822	0.00387429	0.0327844
chr9_10S:3156732-3163474	NM_001085641	hoxb7.S	67.0784	47.5136	40.0956	58.3469	89.2911	82.2581	84.9652	0.563801	0.19531	2.88669	0.00389312	0.0328806
chr4L:65524988-65535128	NM_001171074	ciapin1.L	747.616	814.006	958.475	747.396	651.709	620.404	693.703	-0.329999	0.114315	-2.88677	0.00389224	0.0328806
chr3L:120302440-120307524	NM_001087945	nefl.L	142.604	372.937	67.7806	252.837	59.1409	41.6246	61.304	-0.550218	0.19067	-2.88571	0.0039053	0.0329519
chr2L:46697692-46705022	NM_001088666	ift20.L	290.691	249.222	234.845	259.32	342.089	310.202	348.465	0.381343	0.132182	2.88498	0.00391438	0.0329654
chr9_10L:105608659-105642211	NM_001091142	xpo6.L	787.292	803.248	1067.31	798.334	680.7	672.931	701.232	-0.344238	0.119318	-2.88506	0.00391344	0.0329654
chr3L:2283329-2302212	NM_001095719	arfgap3.L	1675.33	1473.82	1435.8	1627.23	1920.34	1863.2	1731.57	0.267406	0.0927431	2.8833	0.00393537	0.0331104
chr1S:117024808-117043078	NM_001086787	hnrnpc.S	5658.67	5208.56	4831.52	5483.69	6104.26	5922.58	6401.43	0.237653	0.0824356	2.88289	0.00394043	0.0331214
chr3L:77790464-77792403	NM_001089830	atp6v1f.S	88.0067	106.681	130.788	92.6142	75.3756	63.4279	59.153	-0.54091	0.187708	-2.88167	0.00395578	0.0332187
chr8L:51225307-51260611	NM_001114771	hla-drb1.L	11.5216	0.896482	7.63725	3.70457	13.9155	25.7676	17.2081	0.539397	0.187262	2.88044	0.00397122	0.0333167
chr9_10L:7443331-7456045	NM_001086588	arf1.L	8317.42	7500.87	6530.8	8444.56	9177.27	9470.58	8780.46	0.272178	0.0946274	2.87632	0.00402347	0.0336909
chr2L:13610703-13623514	NM_001095087	donson.L	3557.02	3152.03	3349.89	3277.62	3805.89	4037.58	3719.11	0.232672	0.0808876	2.87648	0.00402133	0.0336909
chr2L:168146260-168175226	NM_001099906	med17.L	258.204	220.535	189.977	239.871	324.695	292.363	281.783	0.406351	0.141338	2.87502	0.00404006	0.0337976
chr9_10S:102265789-102284915	NM_001097781	phgdh.S	285.94	388.177	283.533	323.223	242.362	242.81	235.537	-0.406543	0.141453	-2.87406	0.00405234	0.0338682
chr6S:852411-872390	NM_001094508	btn2a1.S	159.152	216.949	172.793	179.672	140.315	113.972	131.212	-0.465303	0.161938	-2.87334	0.00406157	0.0339132
chr2S:111694545-111703076	NM_001095222	mettl18.S	430.455	409.692	349.404	363.974	492.841	467.781	499.036	0.34429	0.119976	2.86967	0.00410906	0.0342772
chr6S:71633930-71645044	NM_001086109	rbm24.S	694.94	684.912	593.796	551.054	834.93	728.43	776.518	0.326242	0.113737	2.8684	0.00412558	0.034294
chr8L:81839158-81879413	NM_001087238	ehd4.L	649.952	476.928	549.882	664.97	710.85	732.394	764.687	0.349628	0.121901	2.86813	0.00412901	0.034294
chr9_10L:114087347-114098854	NM_001093324	qprt.L	13.7461	3.58593	3.81863	9.26142	13.9155	34.6871	17.2081	0.557272	0.194261	2.86867	0.00412198	0.034294
chr4L:44492234-44505713	NM_001094611	LOC494777	123.315	196.33	131.743	126.881	91.6104	104.061	89.2673	-0.515925	0.179889	-2.86802	0.00413054	0.034294
chr5S:24991260-24998742	NM_001095331	chac2.S	32.3229	50.203	44.8688	39.8241	16.2347	27.7497	15.0571	-0.608168	0.212005	-2.86865	0.00412233	0.034294
chr9_10L:17033829-17070488	NM_001094588	dido1.L	1205.67	1161.84	1388.07	1475.34	1132.95	1008.9	1066.91	-0.305215	0.106499	-2.86591	0.00415817	0.0344909
chr2L:13584926-13604679	NM_001091961	cryzl1.L	399.081	524.442	429.595	412.133	345.568	355.791	326.955	-0.368149	0.128547	-2.86393	0.0041842	0.0346741
chr2S:51817178-51995585	NM_001091517	anks1a.S	305.647	356.8	361.815	332.485	258.596	285.426	238.763	-0.378094	0.132052	-2.86323	0.00419349	0.0347185
chr8L:90309924-90311537	NM_001085696	foxg1.L	49.7634	14.3437	39.1409	38.898	100.887	51.5352	53.7755	0.606268	0.211837	2.86195	0.00421042	0.0348259
chr1L:141669063-141684876	NM_001086340	pnp.L	1705.39	2192.8	1815.76	1785.6	1711.61	1562.9	1163.7	-0.349778	0.122243	-2.86132	0.00421881	0.0348626
chr9_10L:16938971-16946753	NM_001086307	MGC64368	151.573	209.777	187.113	150.961	106.685	138.749	116.155	-0.480621	0.168056	-2.85989	0.00423793	0.0349878
chr9_10S:12055037-12066459	NM_001088803	aurka.S	1452.88	1324.1	1211.46	1385.51	1631.59	1483.62	1681.02	0.274504	0.096017	2.85892	0.00425091	0.035062
chr3L:134596243-134601344	NM_001095462	c17orf49.L	318.667	433.001	295.943	385.275	242.362	259.658	295.765	-0.416327	0.145717	-2.8571	0.00427529	0.0352301
chr4L:63818891-63854756	NM_001089238	fa2h.L	535.185	429.415	345.586	566.799	594.888	555.985	718.44	0.413542	0.14481	2.85575	0.00429347	0.0353469
chr3S:44695823-44710172	NM_001086852	idh2.S	1916.64	1604.7	1788.07	1818.94	2124.43	2166.46	1997.22	0.258138	0.0904232	2.85477	0.00430676	0.0353901
chr9_10L:49978170-49987825	NM_001096265	krt18	267.913	242.947	161.337	246.354	298.024	270.56	388.259	0.45877	0.160698	2.85486	0.00430553	0.0353901
chr1S:104470981-104481517	NM_001092597	LOC100486127.S	337.522	467.067	339.858	371.383	259.756	330.023	257.047	-0.411968	0.144328	-2.85438	0.00431214	0.0354014
chr8L:57883940-57913638	NM_001088397	meis3.L	1489.42	1538.36	1044.39	1324.38	1754.51	1603.54	1671.34	0.333644	0.116903	2.85402	0.00431698	0.0354081
chr7L:10258384-10287256	NM_001094242	ipmk.L	76.3305	102.199	98.3296	88.9096	41.7465	64.419	62.3795	-0.549238	0.192626	-2.85131	0.00435392	0.0356778
chr2L:178192767-178203561	NM_001100939	rps3.L	3206.52	3186.1	2715.04	2796.02	3273.62	3761.08	3507.24	0.263731	0.0925816	2.84864	0.00439069	0.0359457
chr6L:108919985-108931913	NM_001093576	riok3.L	815.82	796.076	1072.08	902.062	776.949	730.412	617.342	-0.347715	0.122221	-2.84496	0.00444167	0.0363293
chr9_10S:1087206-1090663	NM_001088963	krt12.S	15978.4	14577.7	9853.96	16820.6	16871.4	17817.3	19929.2	0.363901	0.127994	2.8431	0.00446773	0.0365086
chr4S:845140-857832	NM_001093703	LOC100124841.S	177.597	235.775	196.659	195.416	147.272	150.641	139.816	-0.438796	0.1544	-2.84194	0.00448393	0.036607
chr9_10S:76149568-76168494	NM_001088933	tra2b.L	6656.59	6044.08	6160.4	6230.16	6946.15	7110.87	7447.9	0.214976	0.0756854	2.84039	0.0045059	0.0367523
chr2S:58379092-58394922	NM_001095127	nuak2.S	598.398	556.715	916.47	614.032	550.822	460.844	491.508	-0.410228	0.144549	-2.838	0.00453976	0.0369942
chr4L:72094876-72108648	NM_001094519	cth.L	2812.85	3262.3	3013.85	2914.57	2456.09	2712.53	2517.77	-0.24638	0.0868698	-2.8362	0.00456545	0.0371692
chr3S:52172603-52178674	NM_001085972	rsl24d1.S	1932.57	1831.51	1696.42	1741.15	2025.86	2252.68	2047.77	0.251918	0.0888428	2.83555	0.00457469	0.03721
chr7S:3845320-3863760	NM_001096955	phc1.S	807.665	673.258	692.126	792.777	910.305	887	890.522	0.296065	0.104437	2.83486	0.00458457	0.0372559
chr6L:40682099-40763277	NM_001112841	cpvl.L	794.09	531.614	821.004	687.197	884.794	1012.86	827.067	0.373381	0.131751	2.83398	0.00459727	0.0373247
chr3S:99746503-99763929	NM_001092577	kiaa1191.S	756.614	585.403	586.159	801.113	837.249	854.295	875.464	0.345496	0.12195	2.8331	0.00460985	0.0373924
chr3S:53460683-53533511	NM_001090443	adam10.S	461.186	528.028	585.204	463.071	373.399	365.702	451.714	-0.3633	0.128373	-2.83003	0.00465438	0.0377189
chr8S:77830659-77838201	NM_001086331	rps5.S	2308.51	2182.04	1755.61	2261.64	2465.36	2546.04	2640.38	0.285345	0.100849	2.82942	0.00466321	0.0377211
chr5S:133808171-133831599	NM_001092149	hadha.S	591.891	754.838	618.617	626.072	558.939	515.352	477.526	-0.335328	0.118505	-2.82967	0.00465964	0.0377211
chr5L:124768484-124792601	NM_001092304	efhd1.L	1078.37	965.511	788.546	1050.24	1397.35	1018.81	1249.74	0.349487	0.123548	2.82876	0.00467292	0.0377649
chr7S:67074926-67083718	NM_001088072	rpl22.S	959.302	842.693	776.136	940.034	1146.87	1007.91	1042.17	0.299152	0.105852	2.82613	0.00471136	0.0380407
chr4S:1945905-1951027	NM_001088897	act3.S	11.2952	3.58593	4.77328	4.63071	26.6714	10.9017	17.2081	0.538868	0.190737	2.82519	0.00472526	0.038118
chr6L:74654075-74717299	NM_001096343	basp1.L	62.1377	48.41	29.5943	52.7901	70.7371	72.3475	98.9468	0.572578	0.202723	2.82444	0.00473632	0.0381722
chr3S:3501933-3509915	NM_001088255	wee2	405.369	487.686	953.702	308.405	221.488	220.016	240.914	-0.594937	0.210843	-2.82171	0.0047769	0.038445
chr1L:141900290-141906819	NM_001099863	emc4.L	594.349	496.651	494.512	579.765	660.986	637.252	696.93	0.318303	0.11281	2.82157	0.00477889	0.038445
chr8L:49350405-49370050	NM_001092019	vasp.L	783.182	909.033	809.549	885.392	700.413	659.056	735.648	-0.294003	0.104229	-2.82074	0.00479127	0.0385094
chr4L:133724266-133729475	NM_001095426	jagn1.L	634.719	602.436	482.101	589.026	727.085	721.493	686.175	0.322901	0.114521	2.81957	0.00480883	0.0386153
chr7S:72231840-72247680	NM_001087126	u2af2.S	29283.9	26890.9	24694.1	29044.7	32226	31751.6	31096.2	0.228689	0.0811444	2.8183	0.00482791	0.0387332
chr2L:88314094-88323275	NM_001086413	ndufs5.L	414.263	508.305	373.271	551.054	353.686	326.059	373.202	-0.390867	0.13887	-2.81463	0.0048833	0.039142
chr3L:108263106-108290477	NM_001086830	map2k1.L	1756.39	2252.86	1663.97	1940.27	1493.6	1566.87	1620.79	-0.301299	0.107063	-2.81423	0.0048894	0.0391552
chr1L:53980660-53987348	NM_001086567	rab33b.L	54.7499	93.2341	68.7353	52.7901	38.2676	35.6782	39.7938	-0.57633	0.20486	-2.81329	0.00490373	0.0392343
chr4S:39609922-39615489	NM_001093003	rpl13.S	6106.3	5575.22	4746.55	6106.05	7262.73	6118.81	6828.41	0.281132	0.0999692	2.81219	0.00492054	0.0393331
chr9_10L:100353219-100371546	NM_001095863	rac1.L	525.258	572.852	591.887	631.629	491.681	506.432	357.069	-0.364059	0.129546	-2.81028	0.00494989	0.0395318
chr9_10S:76176093-76191401	NM_001090501	hspd1.S	1546.71	1781.31	1736.52	1568.88	1345.16	1484.61	1363.75	-0.263828	0.0939356	-2.80861	0.00497564	0.0396655
chr1L:18531870-18685887	NM_001096210	stx18.L	39.2154	58.2713	39.1409	61.1254	22.0329	26.7587	27.9632	-0.590187	0.210122	-2.80878	0.00497294	0.0396655
chr6S:3102499-3109824	NM_001096204	cdc25a.S	144.23	115.646	135.561	89.8358	141.474	202.177	180.686	0.489402	0.174278	2.80817	0.00498235	0.0396831
chr4L:87762519-87781619	NM_001092790	dhcr24.L	206.022	293.15	199.523	236.166	165.826	170.463	171.006	-0.438666	0.156284	-2.80685	0.00500284	0.039781
chr3S:114096187-114107128	NM_001161893	LOC100302093	53339.1	48991	47286	51780.6	59064.3	56492.5	56420.1	0.209165	0.074521	2.8068	0.00500368	0.039781
chr5L:23288272-23301044	NM_001096126	nfkbie.L	1015.14	1174.39	1060.62	1109.52	926.54	895.919	923.862	-0.269283	0.0959704	-2.80589	0.00501775	0.039857
chr4S:76967138-77004692	NM_001091511	abcd3.S	405.213	448.241	507.877	422.321	338.61	377.594	336.634	-0.350402	0.124915	-2.80511	0.00502991	0.0399176
chr1L:68759881-68825615	NM_001087609	rap1gds1.L	280.241	339.767	311.218	311.184	233.085	251.73	234.461	-0.372929	0.132972	-2.80458	0.00503829	0.039948
chr5L:16356343-16396141	NM_001090244	capn2.2.L	245.71	189.158	214.798	213.939	257.437	266.595	332.332	0.407432	0.145371	2.8027	0.00506766	0.0401298
chr6L:10670545-10723057	NM_001127806	galnt11.L	359.157	448.241	460.144	331.559	306.141	314.166	294.69	-0.385793	0.137659	-2.80253	0.00507032	0.0401298
chr8S:32680069-32686498	NM_001086440	set.S	32932.9	30791.5	28786.7	31824.1	35605.1	35694.1	34896	0.209471	0.0747605	2.80189	0.00508039	0.0401367
chr4S:107684628-107696699	NM_001086775	sec61a1.S	8514.91	8181.3	6447.75	8375.1	9162.2	9345.71	9577.41	0.271932	0.0970741	2.80128	0.00508999	0.0401367
chr3L:133561504-133583313	NM_001088789	gtf2f1.L	3747.68	3362.7	3347.98	3597.13	3832.56	4117.86	4227.83	0.231218	0.082536	2.80142	0.00508778	0.0401367
chr2L:71911255-71941442	NM_001090035	capza1.L	1239.47	1390.44	1483.54	1240.1	1040.18	1208.1	1074.43	-0.28821	0.102899	-2.8009	0.00509605	0.0401367
chr6S:126885948-126890765	NM_001096171	cyc1.S	393.848	500.237	395.228	448.253	343.249	357.773	318.351	-0.358379	0.127959	-2.80074	0.00509853	0.0401367
chr6S:10401527-10412307	NM_001097750	LOC100036994	42.4164	51.996	65.8713	51.8639	24.3521	35.6782	24.7367	-0.584473	0.208623	-2.80157	0.0050854	0.0401367
chr7L:50595165-50687850	NM_001174019	med19.L	943.286	789.801	845.826	902.988	1087.73	1001.96	1031.41	0.280148	0.100093	2.79886	0.00512832	0.0403352
chr6S:3344246-3367428	NM_001091773	ngfr.S	3316	3034.59	2885.93	3120.17	3855.75	3747.2	3252.34	0.251397	0.0898505	2.79795	0.00514283	0.0404132
chr7L:70714451-70720023	NM_001086720	rpl27a.L	759.355	667.879	547.018	775.181	863.92	850.331	851.803	0.334451	0.119666	2.79487	0.0051921	0.0407277
chr1L:67752990-67883116	NM_001093903	ppp3ca.L	404.636	479.618	455.371	440.844	306.141	372.639	373.202	-0.348881	0.124825	-2.79496	0.00519064	0.0407277
chr4L:10720000-10736361	NM_001094173	tfip11.L	1057.89	1175.29	1116.95	1225.29	961.329	829.518	1038.94	-0.293876	0.105208	-2.79329	0.00521755	0.0408909
chr4L:61428372-61464736	NM_001094527	shcbp1.L	365.199	430.311	460.144	358.417	324.695	312.184	305.445	-0.363649	0.130271	-2.79147	0.00524695	0.0410848
chr3S:4438521-4444639	NM_001095254	fbxo7.S	222.002	277.909	241.528	251.911	195.977	188.302	176.384	-0.400327	0.143471	-2.79029	0.00526606	0.0411978
chr6L:108637836-108662354	NM_001090256	gata6.L	2851.29	2649.1	2084.97	2851.59	3379.15	2882.01	3260.94	0.30436	0.109102	2.78967	0.00527617	0.0412403
chr2S:25121721-25136988	NM_001092811	b4galt4.S	82.7844	26.8945	72.5539	72.2391	132.197	110.008	82.8142	0.573312	0.205591	2.78861	0.00529349	0.041339
chr5L:59080523-59110487	NM_001093114	rnaset2.L	166.55	185.572	263.485	154.666	144.953	125.865	124.759	-0.481764	0.172886	-2.78661	0.00532627	0.0415581
chr1L:205726391-205730869	NM_001088220	rax.L	279.77	106.681	77.3272	259.32	445.296	384.532	405.467	0.579125	0.207851	2.78625	0.00533221	0.0415676
chr5L:36868050-36925794	NM_001092955	ninl.L	943.334	849.865	767.544	914.102	1040.18	1000.97	1087.34	0.28606	0.102685	2.78582	0.00533931	0.0415862
chr3L:16960033-16989903	NM_001092729	cxcl14.L	5.66651	14.3437	1.90931	16.6706	0	0	1.07551	-0.409422	0.147027	-2.78467	0.00535823	0.0416888
chr7S:1157198-1179853	NM_001094499	LOC494651	581.248	454.516	543.199	532.532	593.728	659.056	704.459	0.326364	0.11721	2.78444	0.00536195	0.0416888
chr6L:116409675-116413168	NM_001085938	rps20.L	6691.45	6564.94	5146.55	6428.35	7313.75	7303.13	7391.97	0.26411	0.0949445	2.78173	0.00540704	0.0419653
chr3S:75730208-75772855	NM_001089127	mapk12.S	156.944	181.089	223.39	159.296	115.962	144.695	117.231	-0.464301	0.166905	-2.78183	0.00540525	0.0419653
chr2L:129893045-130003170	NM_001091305	tdrd3.L	195.42	222.328	231.027	228.757	153.07	168.48	168.855	-0.408605	0.146989	-2.77984	0.00543858	0.0421729
chr9_10L:2447037-2452227	NM_001087803	42sp43.L	885.324	625.744	921.243	769.624	976.404	1032.69	986.242	0.337893	0.121589	2.77898	0.00545304	0.0422479
chr7S:88324269-88338093	NM_001088845	LOC398400	1120.47	1038.13	795.229	1119.71	1200.21	1247.75	1321.8	0.32324	0.116356	2.77803	0.00546896	0.0423321
chr7L:58286279-58348398	NM_001110756	casz1.L	11.155	6.27537	0	5.55685	22.0329	15.857	17.2081	0.513543	0.184877	2.77776	0.00547352	0.0423321
chr2S:94521231-94567456	NM_001091444	rev1.S	270.586	346.042	296.898	298.218	212.211	200.194	269.953	-0.402146	0.144823	-2.77681	0.00548949	0.0424184
chr2L:138409117-138447924	NM_001094785	rnf41.L	217.337	306.597	315.037	169.484	177.423	139.74	195.743	-0.488166	0.175905	-2.77517	0.0055173	0.0425959
chr2S:118526466-118538435	NM_001086155	rnd1.S	1809.45	1517.74	1834.85	1536.47	2088.48	1920.68	1958.5	0.271401	0.0978277	2.77428	0.00553243	0.0426753
chr8S:87106756-87117431	NM_001092176	vps18.S	28.0321	32.2734	45.8235	38.898	16.2347	18.8302	16.1326	-0.58833	0.212178	-2.77282	0.00555732	0.0428298
chr5S:73754234-73757138	NM_001087442	eef1a1.L	137152	126453	117014	135473	152480	144858	146632	0.22018	0.0794313	2.77195	0.00557215	0.042869
chr3L:75005762-75012883	NM_001095216	ankrd16.L	30.7479	45.7206	40.0956	41.6764	24.3521	20.8123	11.8306	-0.587981	0.212118	-2.77195	0.00557212	0.042869
chr5S:34375025-34391333	NM_001092113	slc30a6.S	493.405	414.175	406.684	478.815	565.897	530.218	564.642	0.324003	0.116921	2.77113	0.00558623	0.0429399
chr1L:144140309-144153689	NM_001094797	ddx54.L	3779.23	3517.8	3356.57	3584.17	4065.64	4102.99	4048.22	0.216307	0.0780832	2.77021	0.00560199	0.0430235
chr2S:143060963-143091349	NM_001092914	aasdhppt.S	35.4797	51.996	49.6421	41.6764	22.0329	22.7944	24.7367	-0.582658	0.21043	-2.7689	0.00562463	0.0430847
chr1L:163438427-163456733	NM_001093270	anapc7.L	101.186	147.023	120.287	105.58	71.8967	89.1955	73.1346	-0.504989	0.18236	-2.76919	0.00561958	0.0430847
chr3S:4837906-4864357	NM_001130951	etv6.S	199.569	251.911	257.757	194.49	157.709	151.632	183.912	-0.431303	0.155762	-2.76899	0.00562304	0.0430847
chr8L:56899167-56918958	NM_001094469	LOC100497184.L	1131.63	1292.73	1162.77	1263.26	1047.14	999.981	1023.88	-0.261995	0.094677	-2.76725	0.00565322	0.0432327
chr1L:106161860-106186133	NM_001094918	akap2.L	442.532	366.661	374.225	423.247	494	491.566	505.489	0.326875	0.118124	2.76721	0.00565377	0.0432327
chr3L:15101789-15129748	NM_001085946	canx.S	7205.09	6701.2	6570.9	6765.47	7561.91	7880.92	7750.12	0.204418	0.0738802	2.76689	0.0056594	0.0432382
chr5L:90494993-90523593	NM_001096181	elovl5.L	321.085	333.491	404.774	359.343	278.31	278.488	272.104	-0.361556	0.130775	-2.76471	0.00569734	0.0434903
chr3L:130764047-130810347	NM_001092194	tyk2.L	636.141	857.037	618.617	698.311	547.343	471.745	623.795	-0.361963	0.13096	-2.76391	0.00571128	0.0435401
chr2L:1789697-1792993	NM_001097954	LOC100049121	476.236	877.656	340.812	732.578	325.855	293.354	287.161	-0.585225	0.211748	-2.76377	0.00571374	0.0435401
chr7L:27034445-27066564	NM_001091949	arhgap19.L	325.118	346.042	397.137	367.678	256.277	295.336	288.236	-0.359565	0.130196	-2.76172	0.00574973	0.0437764
chr9_10L:92660310-92668949	NM_001095990	MGC114789	997.98	967.304	815.277	899.284	1064.54	1172.43	1069.06	0.283159	0.102576	2.76049	0.0057715	0.0439043
chr1L:107063995-107082819	NM_001088100	melk.L	1210.04	1047.09	1143.68	1102.11	1361.4	1287.39	1318.57	0.255297	0.0925109	2.75965	0.00578642	0.0439798
chr4S:54875365-54920266	NM_001127816	nexn.S	85.8871	55.5819	78.2818	54.6424	127.559	72.3475	126.91	0.542796	0.196827	2.75773	0.00582044	0.0442002
chr1S:158974123-159025011	NM_001090471	pik3r1.S	587.105	484.997	477.328	582.543	695.775	681.85	600.134	0.326024	0.11825	2.75708	0.00583208	0.0442505
chr3S:2945574-2955581	NM_001092773	mkrn1.S	1666.06	1964.19	1793.8	1706.88	1457.65	1589.66	1484.2	-0.256314	0.0929894	-2.75638	0.00584456	0.044307
chr6L:144810594-144931781	NM_001094422	efr3a.L	685.824	836.418	794.274	682.567	529.949	675.904	595.832	-0.328354	0.119161	-2.75556	0.00585912	0.0443792
chr8S:31350440-31353967	NM_001092017	rpl7a.S	3914.45	3416.49	2771.37	4164.86	4494.71	4080.2	4559.08	0.31593	0.11468	2.75489	0.00587119	0.0444324
chr3S:11302867-11309721	NM_001112880	LOC100127315	2131.55	1835.1	1810.03	2110.68	2219.52	2209.08	2604.88	0.272505	0.0989735	2.75331	0.0058996	0.0446091
chr9_10L:32298784-32329815	NM_001090562	top1.1.L	18575.9	17087.8	17030.1	17656	19733.3	19485.3	20462.6	0.198915	0.0722632	2.75265	0.0059115	0.0446607
chr3L:124207609-124257230	NM_001090864	fgfr1.L	3128.11	2972.73	2967.07	2670.07	3424.37	3349.79	3384.63	0.229046	0.0832499	2.7513	0.00593588	0.0448065
chr5S:11784934-11837227	NM_001097842	coq8a.S	1003.43	1236.25	988.069	1106.74	891.751	914.75	882.993	-0.288628	0.104938	-2.75046	0.00595124	0.044884
chr9_10S:86494095-86498030	NM_001087173	uncx.L	7.33179	0	1.90931	3.70457	12.7559	14.8659	10.7551	0.464358	0.168884	2.74957	0.00596738	0.0449672
chr4L:90535264-90572764	NM_001093914	dhx9.L	3431.83	3288.3	2780.91	3275.76	3923.01	3813.6	3509.39	0.253707	0.092292	2.74896	0.00597852	0.0450127
chr9_10L:111222345-111237198	NM_001092235	alkbh5.L	2491.88	2365.82	2088.79	2303.31	2434.05	2941.47	2817.83	0.263181	0.0957546	2.74849	0.00598703	0.0450382
chr3S:14116650-14158299	NM_001086158	hspa9.S	1526.25	1262.25	1396.66	1480.9	1628.11	1772.02	1617.57	0.26295	0.0956904	2.74792	0.00599743	0.045078
chr4S:105555481-105565261	NM_001094623	chchd4.S	666.043	621.262	505.013	629.776	782.747	679.868	777.593	0.321249	0.116944	2.74703	0.0060137	0.0450848
chr3L:134471292-134483967	NM_001095986	ddx27.L	5781.26	5126.98	5157.05	5642.98	6171.52	5968.17	6620.83	0.226875	0.0825864	2.74712	0.00601206	0.0450848
chr9_10L:45175773-45177147	NM_001097111	dbi.S	65.9879	107.578	62.0527	83.3528	49.8639	43.6067	49.4734	-0.549505	0.20003	-2.74712	0.00601208	0.0450848
chr6L:88893926-88910530	NM_001096003	MGC114939	735.83	900.964	779	767.772	662.146	663.02	642.079	-0.293983	0.107056	-2.74607	0.00603146	0.0451796
chr6S:38172354-38181202	NM_001097082	nkiras1.S	148.727	188.261	172.793	166.706	112.484	120.909	131.212	-0.440666	0.160529	-2.74509	0.00604941	0.0452755
chr9_10S:26412338-26421967	NM_001095460	ube2c.S	697.597	786.215	759.906	766.845	587.93	650.136	634.55	-0.284651	0.103722	-2.74438	0.00606259	0.0453356
chr9_10L:18793880-18796836	NM_001091112	socs3.L	246.547	230.396	167.065	201.899	206.413	337.952	335.559	0.452382	0.164914	2.74314	0.00608552	0.0454685
chr4S:64363799-64375491	NM_001088068	nasp.S	2338.57	2320.1	2775.19	2580.23	1978.32	2193.22	2184.36	-0.257699	0.0939898	-2.74178	0.00611078	0.0455824
chr1S:10392744-10411757	NM_001093601	spon2.S	8.16919	15.2402	13.3652	12.966	1.15962	1.98212	4.30204	-0.488164	0.178048	-2.74176	0.00611111	0.0455824
chr9_10L:23464470-23471852	NM_001094914	sirt7.L	978.347	1264.94	874.465	1165.09	847.686	816.635	901.277	-0.332744	0.121389	-2.74114	0.00612266	0.0456298
chr2S:21076468-21133175	NM_001094338	dopey2.S	90.8241	136.265	117.423	87.9835	71.8967	48.562	82.8142	-0.530181	0.193456	-2.74058	0.00613306	0.0456688
chr1L:154288925-154306846	NM_001088373	cdc45.L	319.92	405.21	347.495	347.303	308.46	275.515	235.537	-0.375543	0.137082	-2.73955	0.0061523	0.0457733
chr1L:94156332-94185774	NM_001090693	ppp2cb.L	754.443	908.136	894.513	727.947	614.601	663.02	718.44	-0.314696	0.114963	-2.73737	0.00619333	0.0460009
chr2L:174739043-174757120	NM_001095320	rsph1.L	185.725	183.779	107.876	157.444	242.362	212.087	210.8	0.456636	0.166807	2.73751	0.0061907	0.0460009
chr2S:49502845-49544525	NM_001091031	rap1a	322.2	366.661	368.497	366.752	242.362	308.22	280.708	-0.360717	0.131792	-2.73703	0.00619975	0.0460098
chr9_10S:29689335-29702903	NM_001086397	map1lc3a.S	126.604	133.576	187.113	137.995	110.164	96.1329	94.6448	-0.477197	0.17439	-2.73639	0.00621181	0.0460218
chr3L:80510982-80527891	NM_001089994	ube2q2.L	638.737	754.838	704.536	664.97	561.258	576.798	570.02	-0.29309	0.107101	-2.73658	0.00620819	0.0460218
chr2L:37462723-37490297	NM_001092899	arsh.L	139.49	182.882	147.972	167.632	111.324	123.883	103.249	-0.453162	0.165632	-2.73596	0.00621983	0.0460424
chr1L:59764196-59771655	NM_001096243	ccna2.L	7167.58	8175.92	7906.46	7255.4	6084.55	6519.2	7063.94	-0.236101	0.0863492	-2.73426	0.00625213	0.0462427
chr8L:3357304-3361900	NM_001096465	rexo4.L	2331.6	2107.63	1796.66	2361.66	2646.26	2689.74	2387.63	0.282556	0.10337	2.73343	0.00626778	0.0463195
chr6S:128223324-128232854	NM_001094723	LOC495017	378.07	502.926	363.724	427.878	322.376	331.014	320.502	-0.365152	0.133644	-2.73228	0.00628981	0.0464434
chr4L:95953105-95957544	NM_001161386	barhl2.L	18.3847	12.5507	6.68259	10.1876	23.1925	29.7318	27.9632	0.567767	0.207828	2.73191	0.00629691	0.0464568
chr5S:93564985-93582731	NM_001086755	pdcd10.S	274.216	316.458	400.956	246.354	231.925	214.069	235.537	-0.421384	0.154389	-2.72937	0.0063456	0.0467378
chr1S:160179197-160195745	NM_001097749	ppwd1.S	1189.71	1420.03	1138.91	1383.66	1047.14	1051.52	1097.02	-0.283808	0.10398	-2.72945	0.00634402	0.0467378
chr7L:83716032-83718078	NM_001085995	MGC53782	146.302	95.0271	112.649	138.921	151.911	155.597	223.706	0.480273	0.176035	2.72828	0.00636656	0.046853
chr4S:111143282-111155934	NM_001093331	cidec.S	238.262	250.119	183.294	150.961	318.897	260.649	265.651	0.438275	0.160718	2.72698	0.0063916	0.046998
chr1L:166255255-166382598	NM_001093474	taok3.L	318.578	339.767	406.684	344.525	250.479	290.381	279.632	-0.363696	0.133545	-2.72339	0.00646148	0.047447
chr3S:72389499-72404254	NM_001095539	slc26a4.S	20.5796	5.37889	1.90931	21.3013	34.7887	26.7587	33.3408	0.542387	0.199166	2.72329	0.00646344	0.047447
chr3S:97201148-97217690	NM_001087787	cdc25c.S	335.307	371.144	414.321	354.712	294.545	295.336	281.783	-0.347955	0.12789	-2.72075	0.00651349	0.0477349
chr8S:83169505-83181925	NM_001093528	napb.S	1072.51	1239.83	1154.18	1128.04	943.935	998.99	970.109	-0.259141	0.095239	-2.72095	0.00650944	0.0477349
chr2L:133298591-133309731	NM_001095476	tnfsf11.L	12.3344	11.6543	35.3223	12.966	6.95775	4.95531	2.15102	-0.511322	0.18796	-2.72038	0.00652067	0.0477477
chr8L:116026242-116036733	NM_001093987	slc25a44.L	762.515	632.02	736.995	671.453	848.845	789.876	895.899	0.291419	0.107171	2.7192	0.00654402	0.047879
chr6L:15533840-15543339	NM_001110745	gtpbp4.L	5796.03	5348.41	4663.5	5800.43	6617.98	6246.66	6099.21	0.249233	0.091671	2.71877	0.00655242	0.0479007
chr8L:48893921-48958947	NM_001087355	atp11c.S	292.513	228.603	219.571	291.735	364.122	361.737	289.312	0.394446	0.14515	2.7175	0.00657763	0.048045
chr6S:72785310-73285070	NM_001091487	cdkal1.S	1329.36	1388.65	1527.45	1448.49	1178.18	1293.34	1140.04	-0.258212	0.0950569	-2.7164	0.00659968	0.0481662
chr6L:55693834-55841161	NM_001087971	gli3.L	268.853	203.501	167.065	288.956	277.15	316.149	360.296	0.438511	0.161577	2.71394	0.00664882	0.0484445
chr1S:162221975-162232197	NM_001110718	isl1.S	203.383	164.056	149.881	195.416	244.681	245.783	220.479	0.409446	0.150859	2.7141	0.00664565	0.0484445
chr3S:99027564-99037939	NM_001086937	prelid1.S	315.359	235.775	313.127	251.911	405.869	311.193	374.277	0.387629	0.142903	2.71254	0.00667702	0.0486098
chr6S:33700195-33747159	NM_001086824	hoxa3.S	107.442	62.7537	74.4632	106.506	171.624	110.999	118.306	0.515884	0.190221	2.71202	0.00668738	0.0486451
chr7L:35905854-35939442	NM_001091344	micu1.L	58.6426	79.7869	66.8259	76.8698	44.0657	45.5888	38.7183	-0.538615	0.1987	-2.71069	0.00671433	0.0487605
chr1S:114547254-114564460	NM_001092588	gmpr2.S	93.0929	42.1347	78.2818	87.9835	126.399	112.981	110.777	0.525945	0.194019	2.7108	0.00671217	0.0487605
chr8S:5954964-5965065	NM_001087556	pnn.S	7003.76	6347.99	6346.56	6594.13	7209.39	7212.94	8311.54	0.22741	0.083975	2.70807	0.00676762	0.0491071
chr2S:129984445-130012423	NM_001088194	rarg.S	3638.22	3342.98	3109.32	3544.34	4165.37	3875.05	3792.25	0.232667	0.0859291	2.70766	0.00677587	0.0491265
chr4S:94373651-94388589	NM_001097078	wbp2nl.S	175.909	226.81	199.523	191.711	156.549	149.65	131.212	-0.420049	0.155174	-2.70695	0.00679049	0.049192
chr5S:16464095-16483888	NM_001092517	MGC82991	1136.59	1083.85	953.702	1048.39	1282.55	1212.07	1238.99	0.259556	0.0959247	2.70583	0.00681332	0.0492763
chr3L:94865588-94886849	NM_001093929	cdc42se2.S	167.267	190.951	312.173	122.251	113.643	138.749	125.835	-0.517682	0.191302	-2.7061	0.00680784	0.0492763
chr2L:3677243-3709711	NM_001086333	gap43.L	17.011	6.27537	14.3198	4.63071	19.7136	23.7855	33.3408	0.548209	0.20272	2.70427	0.00684546	0.0493683
chr9_10L:29909025-29929114	NM_001087093	ncoa5.L	3065.09	2784.47	2502.15	3060.9	3521.78	3352.76	3168.45	0.252963	0.0935202	2.7049	0.00683242	0.0493683
chr5L:90709631-90767715	NM_001092900	lrrc1.L	384.185	461.688	476.374	373.235	340.93	352.818	300.067	-0.356384	0.131767	-2.70465	0.00683757	0.0493683
chr9_10S:1879294-1894621	NM_001095593	erbb2.S	61.0634	88.7517	58.234	87.0573	42.9061	48.562	40.8693	-0.542734	0.200706	-2.70412	0.00684846	0.0493683
chr3S:21519797-21562416	NM_001087688	fgfr1.S	1557.34	1463.96	1385.21	1397.55	1804.38	1567.86	1725.12	0.249722	0.0923776	2.70327	0.006866	0.0494543
chr1S:128373890-128380680	NM_001086295	ranbp1.S	6572.56	6362.33	5475.91	6258.87	6942.67	7334.84	7060.72	0.227889	0.0843291	2.70237	0.00688465	0.0495076
chr8S:10859341-10896149	NM_001087151	klc1.L	85.5116	88.7517	113.604	113.915	68.4179	58.4726	69.9081	-0.504712	0.186752	-2.70258	0.00688034	0.0495076
chr2S:114728690-114782453	NM_001087213	elf1.S	676.112	585.403	516.469	679.788	689.977	773.028	812.009	0.322368	0.119328	2.70153	0.00690205	0.0495115
chr3L:55683451-55701391	NM_001092218	mcoln1.L	1218.17	1347.41	1330.79	1306.79	1062.22	1098.1	1163.7	-0.248572	0.0919988	-2.7019	0.00689445	0.0495115
chr6S:16344553-16422708	NM_001095710	deltaef1	71.6157	54.6854	58.234	49.0855	98.5681	85.2313	83.8897	0.517155	0.191422	2.70165	0.00689958	0.0495115
chr8L:52110520-52118743	NM_001096384	nelfe.L	629.557	448.241	636.756	564.02	699.254	735.368	693.703	0.334294	0.123825	2.69972	0.0069397	0.0497007
chr9_10L:2402819-2411573	NM_001098699	ubp1.L	386.554	187.365	186.158	393.61	451.094	557.968	543.132	0.568537	0.210587	2.69977	0.00693882	0.0497007
chr4S:81902160-81923846	NM_001087102	dph5.L	199.677	223.224	298.807	188.933	143.793	161.543	181.761	-0.443727	0.164474	-2.69786	0.00697869	0.0498179
chr8L:60502846-60511580	NM_001092052	ahsa1.L	480.528	443.759	381.863	422.321	488.202	650.136	496.885	0.35023	0.129816	2.6979	0.0069778	0.0498179
chr5L:31516855-31527877	NM_001092518	cct4.L	458.492	412.382	408.593	394.536	517.193	533.191	485.055	0.31036	0.115012	2.6985	0.00696532	0.0498179
chr4S:95155608-95185084	NM_001093385	pla2g6.S	63.5934	102.199	63.0073	77.7959	46.385	41.6246	50.5489	-0.539956	0.200138	-2.69792	0.00697752	0.0498179
chr7S:59066421-59081048	NM_001087137	eno1.S	815.944	924.273	1017.66	786.294	724.766	765.099	677.571	-0.305846	0.113475	-2.69528	0.00703297	0.050121
chr1L:116882963-116889486	NM_001088491	plin2.L	629.196	790.697	870.647	513.083	507.916	554.003	538.83	-0.384184	0.142563	-2.69483	0.0070424	0.050121
chr4L:115123075-115170607	NM_001091114	tmem184b.L	455.881	558.508	488.784	486.224	427.902	384.532	389.334	-0.322169	0.119551	-2.69483	0.0070425	0.050121
chr9_10L:85749057-85758299	NM_001092139	MGC82602	930.065	654.432	846.78	937.256	1119.04	1087.19	935.693	0.331911	0.123169	2.69476	0.00704391	0.050121
chr1L:185084317-185094947	NM_001095037	dhfr.L	248.526	294.943	276.85	281.547	216.85	221.998	198.969	-0.36988	0.137425	-2.6915	0.00711315	0.0505728
chr9_10S:29905633-29918701	NM_001096817	MGC130708	4453.64	4252.91	3940.82	4029.64	4574.72	4606.45	5317.32	0.235278	0.0874654	2.68996	0.0071461	0.0507661
chr2L:119535777-119546637	NM_001093833	ggact.L	41.6513	34.9628	30.549	13.8921	44.0657	81.267	45.1714	0.570258	0.212021	2.68962	0.00715329	0.0507762
chr1L:143046879-143056022	NM_001092248	selenom.L	84.0164	51.996	51.5514	85.205	110.164	91.1776	114.004	0.520256	0.193575	2.68762	0.00719629	0.0509583
chr9_10L:8506412-8545475	NM_001092566	cse1l.L	220.229	250.119	250.12	262.098	208.732	180.373	169.93	-0.388712	0.144625	-2.68772	0.00719412	0.0509583
chr1S:141308117-141399586	NM_001095821	MGC85146	280.604	293.15	368.497	302.848	238.883	245.783	234.461	-0.371598	0.138262	-2.68764	0.007196	0.0509583
chr5S:21885869-21960801	NM_001092095	epas1.S	1060.38	889.31	754.179	1123.41	1085.41	1353.79	1156.17	0.340749	0.126833	2.68659	0.00721855	0.0510749
chr1S:11589167-11617802	NM_001088495	tacc3.S	838.119	745.873	708.355	797.408	1007.71	869.161	900.201	0.281998	0.104998	2.68575	0.00723681	0.0511405
chr1S:127947871-127959602	NM_001096875	comt.S	59.7403	81.5799	58.234	90.7619	44.0657	51.5352	32.2653	-0.545507	0.203121	-2.68562	0.00723943	0.0511405
chr2L:59596443-59619686	NM_001097961	tbrg1.L	400.184	315.562	386.636	334.337	411.667	429.13	523.773	0.354278	0.131977	2.6844	0.00726604	0.0512873
chr2S:127039919-127043951	NM_001087631	birc5.1.L	264.149	331.698	292.125	287.104	202.934	215.06	255.971	-0.379247	0.141371	-2.68263	0.00730455	0.0515178
chr3L:85024717-85039669	NM_001092667	scamp5.L	47.2994	84.2693	48.6875	53.7162	35.9484	26.7587	34.4163	-0.559037	0.208435	-2.68207	0.00731671	0.0515623
chr9_10L:100631738-100643686	NM_001087169	kdelr2.L	4148.48	3869.22	3663.97	3974.07	4490.07	4453.83	4439.7	0.21016	0.0783823	2.68122	0.00733538	0.0515701
chr7L:2245565-2425182	NM_001090849	vti1a.L	353.333	456.309	410.502	353.786	241.202	340.925	317.275	-0.38181	0.142396	-2.68133	0.00733312	0.0515701
chr2L:77766347-77772389	NM_001093050	MGC82241	142.426	112.06	122.196	115.768	150.751	177.4	176.384	0.435092	0.162251	2.68159	0.00732729	0.0515701
chr3S:8279150-8316968	NM_001091894	MGC82181	1672.4	1411.96	1568.5	1585.55	1786.98	1931.58	1749.85	0.247595	0.0923628	2.68068	0.00734724	0.0516123
chr1L:73792697-73813289	NM_001093037	g3bp2.L	1099.61	1264.94	1148.45	1196.58	1025.11	1024.76	937.844	-0.258202	0.0963572	-2.67964	0.00737023	0.0517326
chr5L:43192257-43208662	NM_001086097	MGC53348	3112.36	2786.27	2963.25	2804.36	3374.51	3620.35	3125.43	0.2322	0.0867107	2.67787	0.00740927	0.0518147
chr6L:60323484-60336631	NM_001089216	velo1.L	289.705	334.388	760.861	201.899	135.676	164.516	140.892	-0.545566	0.203704	-2.67823	0.00740113	0.0518147
chr5L:5014006-5032561	NM_001095778	msh6.L	2195.32	2494.01	2371.37	2270.9	1944.69	1985.1	2105.85	-0.231198	0.0863396	-2.67777	0.00741134	0.0518147
chr8L:49733224-49748517	NM_001096754	nova2.L	419.669	406.106	343.676	338.042	525.31	500.486	404.391	0.351769	0.13134	2.67831	0.00739939	0.0518147
chr5L:68560627-68578772	NM_001127814	rsph3.L	117.681	81.5799	90.6924	108.359	162.347	130.82	132.288	0.468655	0.174963	2.6786	0.00739313	0.0518147
chr7L:6181054-6189526	NM_001093951	c12orf57.L	569.755	400.727	537.472	545.498	695.775	579.771	659.287	0.343738	0.12839	2.67729	0.00742205	0.0518484
chr9_10S:62162025-62164105	NM_001090566	hoxd1.S	1136.69	1114.33	795.229	1091	1238.48	1213.06	1368.05	0.317955	0.118812	2.67613	0.00744785	0.0519874
chr3S:1587446-1591796	NM_001086227	has1.S	68697.4	65848.4	54079.4	67874.2	76040.1	76684.4	71658	0.24425	0.0912985	2.6753	0.00746635	0.0520529
chr9_10L:5135533-5162049	NM_001092083	slc4a1.L	189.739	320.044	184.249	181.524	142.634	148.659	161.326	-0.469008	0.175325	-2.67507	0.00747133	0.0520529
chr7L:69575680-69642795	NM_001197283	spa17.L	153.728	76.201	140.334	144.478	189.019	212.087	160.251	0.485123	0.181361	2.67491	0.00747496	0.0520529
chr4S:77567329-77582861	NM_001085908	rpl5.S	2732.03	2520.01	2270.17	2700.63	2944.29	2955.34	3001.75	0.237394	0.0888462	2.67197	0.00754077	0.0524283
chr3S:90076645-90079946	NM_001087356	btg1.S	6718.64	6451.98	6125.08	5865.26	7013.41	6801.65	8054.49	0.234819	0.0878747	2.6722	0.0075355	0.0524283
chr6L:87209082-87219245	NM_001086452	ssr1.L	7163.41	6221.59	6187.13	7283.18	7818.19	7961.2	7509.21	0.231479	0.0866771	2.67059	0.00757188	0.052603
chr7L:107709586-107719832	NM_001087847	kras.S	919.732	1019.3	981.387	1040.98	808.258	753.207	915.258	-0.277769	0.104078	-2.66884	0.00761141	0.052836
chr2L:151314724-151341996	NM_001090509	gpd1.L	402.15	299.425	329.356	411.207	426.742	495.531	450.638	0.3568	0.13373	2.66806	0.00762895	0.0528745
chr6L:48164445-48187380	NM_001093067	cmtm7.L	172.017	225.017	197.614	184.302	128.718	130.82	165.628	-0.425976	0.159646	-2.66825	0.00762479	0.0528745
chr6S:45747869-45751985	NM_001087366	eif1b.S	5821.83	5406.68	5321.25	5470.72	6317.64	6006.82	6407.88	0.202628	0.0759701	2.66721	0.00764843	0.0529262
chr5S:49606494-49631205	NM_001096913	nup43.S	1398.33	1543.74	1497.86	1510.54	1295.3	1299.28	1243.29	-0.235135	0.0881558	-2.66727	0.00764713	0.0529262
chr8L:107647091-107658573	NM_001090801	prcc.L	2710.39	2265.41	2476.38	2679.33	2987.19	2801.73	3052.3	0.240523	0.0903729	2.66145	0.0077804	0.0537971
chr3L:79458922-79509440	NM_001087323	impdh1.L	1783.17	1514.16	1579.96	1749.48	1995.71	2086.18	1773.51	0.258653	0.097208	2.66082	0.00779507	0.0538563
chr4L:11505449-11547504	NM_001090727	celf1.L	420.827	493.065	455.371	465.849	397.751	367.684	345.238	-0.318928	0.11989	-2.66016	0.00781025	0.0539189
chr7L:83690765-83692874	NM_001088505	hes5.2.L	15.6663	8.06834	9.54656	6.48299	27.831	23.7855	18.2837	0.542849	0.204297	2.65716	0.0078803	0.0543599
chr9_10L:85419048-85438210	NM_001095686	gby.L	888.737	571.956	372.316	873.352	1187.46	1035.66	1291.69	0.555167	0.209079	2.6553	0.00792381	0.0546173
chr9_10L:97287253-97291472	NM_001090100	gpr146.L	22.0838	10.7578	13.3652	13.8921	37.108	20.8123	36.5673	0.558153	0.210313	2.65391	0.0079565	0.0547997
chr7L:74033680-74052707	NM_001089935	slc37a4.L	231.388	219.638	184.249	168.558	342.089	245.783	228.008	0.422387	0.159221	2.65284	0.00798167	0.0548872
chr8S:32680062-32686050	NM_001090705	set.L	29941.6	28093.1	26262.6	29067.9	32358.2	32391.8	31475.9	0.199293	0.0751187	2.65304	0.00797694	0.0548872
chr5L:6951100-7164733	NM_001092078	camkmt.L	232.273	284.185	249.165	266.729	185.54	197.221	210.8	-0.37549	0.141668	-2.65049	0.00803745	0.0552277
chr9_10L:157416-164718	NM_001087405	hm13.L	947.228	815.799	719.811	978.006	1120.2	976.195	1073.36	0.306908	0.115822	2.64982	0.00805336	0.0552508
chr1S:129494588-129512733	NM_001091362	noc4l.S	813.938	757.527	631.028	774.255	1011.19	825.554	884.069	0.303841	0.114654	2.65007	0.00804749	0.0552508
chr2L:40922567-40963409	NM_001142787	baz1b.S	1584.49	1260.45	1442.49	1573.51	1806.7	1597.59	1826.21	0.272202	0.102735	2.64954	0.00806005	0.0552537
chr4S:20372062-20419003	NM_001096891	prmt3.S	447.348	565.68	470.646	489.003	338.61	459.852	360.296	-0.351514	0.132687	-2.6492	0.00806815	0.0552662
chr1L:162127486-162192483	NM_001093146	hip1r.L	196.164	228.603	222.435	230.609	184.38	162.534	148.42	-0.395184	0.14923	-2.64816	0.00809304	0.0553936
chr9_10L:103922458-103935070	NM_001086432	ccnf.L	1810.43	1679.11	1538.91	1734.66	1996.87	1851.3	2061.75	0.242142	0.091529	2.64552	0.00815658	0.0557852
chr6L:35888455-35901468	NM_001089956	sp4.L	31.4219	48.41	37.2316	41.6764	22.0329	19.8212	19.3592	-0.559895	0.211673	-2.6451	0.00816677	0.0558116
chr5L:152890247-152954590	NM_001095505	elp3.L	572.335	632.916	695.945	580.691	495.16	504.45	524.848	-0.299537	0.113276	-2.64431	0.00818575	0.0558979
chr1L:104894735-104918865	NM_001092041	ncbp1.L	1797.66	2074.46	1986.64	1815.24	1557.38	1604.53	1747.7	-0.246118	0.0930858	-2.64399	0.00819348	0.0559023
chr2S:46962551-46962788	NR_033288	rn7sk	203.051	77.9939	109.785	123.177	539.226	160.552	207.573	0.537657	0.203368	2.64376	0.00819909	0.0559023
chr6S:20149824-20407314	NM_001093186	plxdc2.L	31.1521	69.0291	31.5037	29.6365	18.554	18.8302	19.3592	-0.560004	0.211894	-2.64285	0.00822126	0.0560101
chr9_10S:3976718-3998869	NM_001091740	znf652.S	927.263	840.9	810.503	857.607	1073.81	1051.52	929.24	0.266605	0.100923	2.64168	0.00824951	0.0561592
chr1S:119608164-119631969	NM_001090569	lhx5.S	253.081	294.943	279.714	291.735	223.808	199.203	229.083	-0.362269	0.137395	-2.6367	0.00837177	0.0569035
chr4L:91903599-91953308	NM_001097130	tdrd5.L	227.264	250.119	253.939	277.843	204.094	188.302	189.29	-0.373037	0.141466	-2.63693	0.00836598	0.0569035
chr9_10S:2301894-2313234	NM_001093035	cwc25.S	1691.51	2061.91	1679.24	1809.68	1488.96	1527.23	1582.07	-0.256598	0.0973415	-2.63606	0.00838748	0.0569663
chr3L:119670141-119687809	NM_001087488	sfrp1.L	478.837	510.098	351.314	376.014	580.972	548.057	506.565	0.35558	0.134975	2.63441	0.00842847	0.0572006
chr1L:134806784-134823254	NM_001095666	tdgf1.1.L	107.804	148.816	110.74	130.586	86.9719	78.2938	91.4183	-0.468167	0.177738	-2.63402	0.00843799	0.0572211
chr2L:159205597-159217754	NM_001086258	rpl21.L	2224.73	2199.97	1747.02	2075.48	2254.31	2593.61	2477.97	0.265725	0.10092	2.63303	0.00846263	0.0573441
chr3L:16225800-16237962	NM_001087512	pitx1.L	248.803	113.853	81.1458	245.428	386.155	334.979	331.257	0.555333	0.210983	2.63212	0.00848541	0.0574542
chr8S:5406842-5411491	NM_001091148	acot2.S	56.0834	98.613	53.4608	69.4606	24.3521	34.6871	55.9265	-0.550133	0.209078	-2.63123	0.00850767	0.0575607
chr5L:113345405-113349542	NM_001086847	ssr3.L	906.391	864.209	771.362	787.221	903.348	960.338	1151.87	0.292386	0.111142	2.63074	0.00851986	0.057599
chr1L:159326098-159398642	NM_001092581	glt1d1.L	32.3386	22.4121	14.3198	25.932	46.385	37.6603	47.3224	0.556869	0.211866	2.62841	0.00857851	0.0579081
chr9_10L:24524799-24542028	NM_001096587	utp18.L	1116.92	1025.58	906.924	1093.77	1257.03	1193.24	1225	0.263321	0.100183	2.6284	0.00857874	0.0579081
chr4S:83845230-83864483	NM_001086389	slc25a24.S	387.207	549.544	314.082	502.895	380.357	253.712	322.653	-0.425272	0.161867	-2.62729	0.00860673	0.0580082
chr7L:99693355-99700615	NM_001089214	rpl18.L	2202.7	2053.84	1647.74	2233.85	2458.4	2388.46	2433.88	0.27531	0.104787	2.62733	0.00860576	0.0580082
chr9_10L:57627057-57647968	NM_001091425	rnd3.L	416.991	433.897	302.626	344.525	475.446	478.683	466.771	0.349917	0.133235	2.62632	0.00863142	0.0581301
chr2S:73583205-73594206	NM_001096026	mtfr1l.S	452.924	403.417	422.913	326.928	572.855	393.451	597.983	0.379688	0.144602	2.62575	0.00864578	0.0581823
chr8S:27003780-27034423	NM_001092902	slc31a1.S	436.365	514.581	536.517	425.099	365.282	414.264	362.447	-0.332738	0.126751	-2.62513	0.00866157	0.0581997
chr1L:77862993-77892865	NM_001095787	gtf2e2.L	856.576	976.269	896.422	940.034	767.672	775.01	784.046	-0.25818	0.0983433	-2.62529	0.00865747	0.0581997
chr2L:121473805-121514831	NM_001086630	dnajc3.L	838.42	555.819	765.634	837.232	1116.72	783.93	971.185	0.361932	0.137894	2.62472	0.0086721	0.058226
chr3L:54714843-54747589	NM_001091056	rpap3.L	2390.85	2041.29	2117.43	2390.37	2656.7	2467.74	2671.56	0.239121	0.0911413	2.62363	0.00869977	0.0583573
chr8L:44173243-44176228	NM_001094686	polr1d.2.L	397.437	377.419	348.45	320.445	446.456	426.156	465.695	0.321866	0.122701	2.62317	0.00871153	0.0583573
chr2S:69261434-69271046	NM_001096556	meaf6.S	1302.82	1169.01	1252.51	1147.49	1384.59	1447.94	1415.37	0.239324	0.0912298	2.6233	0.00870816	0.0583573
chr2L:37526680-37551873	NM_001096094	MGC115708	1082	1283.76	1193.32	1090.07	994.958	1029.71	900.201	-0.268544	0.102436	-2.62159	0.00875219	0.0585851
chr1S:134138362-134197934	NM_001091500	hip1r.S	23.6504	43.0311	34.3676	23.1535	12.7559	17.8391	10.7551	-0.552191	0.21072	-2.62049	0.00878025	0.0587284
chr6L:32082463-32120239	NM_001086625	ica1.L	233.922	249.222	264.44	290.809	205.254	187.311	206.498	-0.371474	0.141785	-2.61997	0.00879365	0.0587733
chr5S:56660926-56706789	NM_001092546	dcbld1.S	363.974	332.595	290.216	331.559	417.465	429.13	382.881	0.329644	0.125838	2.6196	0.00880338	0.0587938
chr9_10L:51617298-51651873	NM_001086587	tuba1a.S	1282.76	973.58	584.25	1212.32	1754.51	1411.27	1760.61	0.532474	0.203436	2.6174	0.00886013	0.059128
chr9_10L:40556309-40563200	NM_001085997	znf750.L	1881.78	1385.06	1652.51	1967.13	2080.37	1901.85	2303.74	0.302302	0.115548	2.61626	0.00888996	0.0592821
chr8L:119548339-119550655	NM_001087702	LOC397693	66.2783	77.0975	109.785	65.7561	56.8216	37.6603	50.5489	-0.526761	0.201408	-2.61539	0.00891266	0.0593885
chr2L:61058110-61067337	NM_001090659	lhx1.L	269.154	335.284	294.989	302.848	208.732	279.479	193.592	-0.386701	0.147938	-2.61393	0.00895069	0.0595968
chr5L:6010605-6093332	NM_001092249	epas1.L	136.195	157.781	145.108	183.376	102.047	128.838	100.022	-0.44274	0.169418	-2.61329	0.00896739	0.0596629
chr5L:31461999-31512076	NM_001095984	commd1.L	170.701	187.365	219.571	194.49	117.122	161.543	144.118	-0.418072	0.160056	-2.61203	0.0090007	0.0598393
chr2L:71629523-72013309	NM_001091538	MGC78833	1238.98	1507.88	1295.47	1279	1181.66	1141.7	1028.19	-0.267238	0.102354	-2.61091	0.00903004	0.0599892
chr6S:126843707-126847238	NM_001095210	exosc4.S	616.512	598.85	518.378	536.236	680.7	667.975	696.93	0.284741	0.109087	2.61023	0.00904826	0.0600649
chr6L:4087474-4102826	NM_001093311	klhl18.L	425.874	519.96	446.779	467.702	350.207	410.299	360.296	-0.321954	0.123362	-2.60983	0.00905866	0.0600887
chr4L:88119899-88129591	NM_001086610	serpinc1.L	22.3165	10.7578	11.4559	15.7444	37.108	41.6246	17.2081	0.545634	0.209115	2.60925	0.00907397	0.0601449
chr2L:10982175-10990329	NM_001097016	psmg1.L	1163.97	1131.36	898.332	1092.85	1259.35	1196.21	1405.69	0.284186	0.108954	2.60832	0.00909888	0.0602647
chr4L:104025853-104134145	NM_001086215	cfh.L	801.025	642.778	737.949	760.362	953.212	925.651	786.197	0.29211	0.112063	2.60666	0.0091431	0.0603685
chr9_10S:89967917-89996693	NM_001086853	ccz1b.S	332.491	361.282	420.049	349.155	269.033	282.452	312.973	-0.344316	0.132065	-2.60717	0.00912948	0.0603685
chr1L:5162235-5172393	NM_001087267	paip2b.L	9370.42	8793.59	8126.99	9073.41	9777.96	9848.18	10602.4	0.209592	0.080413	2.60644	0.00914883	0.0603685
chr5L:49913893-49955627	NM_001092675	MGC84007	84.3246	102.199	107.876	100.023	62.6197	77.3028	55.9265	-0.486474	0.186614	-2.60685	0.0091379	0.0603685
chr1L:137996275-138021036	NM_001094906	efs.L	503.429	358.593	447.734	507.526	613.442	536.164	557.114	0.337902	0.129635	2.60658	0.00914528	0.0603685
chr1L:155383055-155432567	NM_001090225	tango2.L	144.87	182.882	163.246	163.927	124.08	118.927	116.155	-0.418775	0.160708	-2.60581	0.00916583	0.0604355
chr7S:16225399-16244184	NM_001093044	ccnj.S	979.414	1150.19	950.838	1132.67	892.911	845.375	904.503	-0.272672	0.104692	-2.60452	0.00920025	0.0605265
chr6L:33597871-33602135	NM_001093484	arl4a.L	1791.46	1691.66	1440.58	1740.22	2011.95	2031.68	1832.67	0.254895	0.0978548	2.60483	0.00919204	0.0605265
chr1L:141937752-141951405	NM_001094660	pip4p1.L	230.236	320.941	258.712	227.831	184.38	161.543	228.008	-0.411697	0.158055	-2.60476	0.00919381	0.0605265
chr1S:145680889-145697656	NM_001091695	slc25a46.S	49.5011	46.6171	108.831	43.5287	35.9484	28.7408	33.3408	-0.550426	0.211383	-2.60392	0.00921634	0.0605871
chr3S:30535012-30544627	NM_001093335	nif.S	7.23521	0.896482	1.90931	2.77843	24.3521	5.94637	7.52856	0.428179	0.164459	2.60357	0.00922586	0.0606045
chr9_10S:38371735-38380009	NM_001094091	mfsd6l.S	128.046	69.9256	108.831	125.029	166.986	143.704	153.798	0.468323	0.180048	2.6011	0.00929255	0.0609082
chr7S:46550351-46599207	NM_001094590	st14.S	183.808	210.673	283.533	162.075	137.995	152.623	155.949	-0.442411	0.170092	-2.601	0.00929521	0.0609082
chr3S:57549130-57554922	NM_001095514	pclaf.S	733.511	895.586	897.377	677.01	596.047	614.458	720.591	-0.321675	0.123682	-2.60083	0.00929976	0.0609082
chr1S:117868455-117871088	NM_001171794	uqcr10.L	573.008	492.169	509.787	518.639	583.291	599.592	734.573	0.306574	0.117845	2.6015	0.00928166	0.0609082
chr6S:124265089-124329923	NM_001096308	MGC131305	162.87	205.294	214.798	158.37	141.474	148.659	108.626	-0.433552	0.16678	-2.59955	0.00933472	0.0610918
chr5L:118760984-118773110	NM_001095956	plscr1.L	762.739	890.207	816.231	814.079	681.859	636.261	737.799	-0.274913	0.105774	-2.59905	0.00934812	0.0611341
chr4L:71870769-71894946	NM_001094819	zranb2.L	1698.42	1576.91	1525.54	1567.03	1766.11	1965.27	1789.65	0.230884	0.0888742	2.59788	0.00938018	0.0612982
chr3S:57302990-57316862	NM_001095699	oaz2.S	182.715	173.918	134.607	144.478	173.944	234.882	234.461	0.418328	0.161241	2.59443	0.00947481	0.0618707
chr6S:101250873-101271128	NM_001101765	impa1	268.244	335.284	251.075	345.451	218.009	197.221	262.424	-0.392016	0.151133	-2.59384	0.00949098	0.0619304
chr4L:130223621-130237368	NM_001090574	gata2.L	8843.07	7631.75	6367.56	9634.65	10047	9933.41	9444.05	0.292018	0.112626	2.5928	0.00951974	0.0620721
chr5S:12213383-12220670	NM_001085906	h3f3c.L	6301.31	5975.95	5499.78	6037.52	6547.24	6800.66	6946.71	0.204998	0.0790726	2.59253	0.00952734	0.0620757
chr5S:12213371-12220665	NM_001098432	h3f3a.L	6300.85	5975.05	5500.73	6037.52	6548.4	6796.7	6946.71	0.204807	0.0790396	2.59119	0.00956436	0.0622708
chr7L:54031447-54066001	NM_001087029	ercc1.L	37.3683	52.8924	44.8688	50.0117	30.1502	24.7765	21.5102	-0.543477	0.209859	-2.58972	0.00960539	0.0624918
chr6L:2781768-2788700	NM_001101777	znf208.L	89.8181	109.371	105.012	112.989	82.3334	61.4458	67.7571	-0.475217	0.183558	-2.58892	0.00962772	0.0625908
chr6L:128956179-128958813	NM_001091976	polr2k.L	229.528	289.564	252.984	246.354	191.338	201.185	195.743	-0.368518	0.142375	-2.58836	0.00964349	0.0626471
chr8L:24130220-24131970	NM_001091795	shisa1.1.L	444.745	580.92	444.87	475.111	402.39	385.523	379.655	-0.327352	0.126527	-2.58721	0.00967568	0.06281
chr1S:151005507-151016000	NM_001091459	cetn3.S	764.287	899.172	957.52	746.47	562.418	587.699	832.444	-0.348141	0.134584	-2.5868	0.00968707	0.0628376
chr6S:101251263-101271088	NM_001092654	impa1.S	250.702	306.597	238.664	327.854	206.413	178.391	246.292	-0.39703	0.15351	-2.58635	0.00969977	0.0628737
chr4S:50847909-50873978	NM_001094823	aktip.S	38.1879	60.9608	64.9166	28.7104	28.9906	20.8123	24.7367	-0.548016	0.211929	-2.58585	0.009714	0.0629196
chr2L:171321862-171333982	NM_001087042	ctsc.L	205.899	252.808	234.845	223.2	189.019	164.516	171.006	-0.379059	0.146677	-2.58432	0.00975713	0.0630672
chr6L:132138858-132158628	NM_001091600	pabpc1.L	9543.99	8828.56	7813.86	9494.81	10377.5	9548.88	11200.4	0.239341	0.092607	2.58448	0.00975251	0.0630672
chr4L:54265660-54282547	NM_001095609	map1lc3b.L	683.667	663.397	565.157	595.509	785.066	819.608	673.269	0.295258	0.114251	2.58428	0.00975828	0.0630672
chr8S:6042688-6065386	NM_001097943	fbxo34.S	397.741	412.382	514.56	416.764	349.047	340.925	352.767	-0.328941	0.127309	-2.58381	0.00977164	0.0631073
chr1L:184039479-184058815	NM_001171786	tmem167a.L	791.249	671.465	714.083	746.47	793.183	879.071	943.222	0.275444	0.106655	2.58258	0.00980642	0.0632855
chr7L:68034614-68058615	NM_001090517	stt3a.L	2971.89	2553.18	2906.93	2709.89	3172.73	3457.81	3030.78	0.230874	0.0894774	2.58025	0.00987287	0.0636677
chr9_10S:61117974-61126593	NM_001091993	cyct.S	47.636	56.4784	73.5085	58.3469	23.1925	49.5531	24.7367	-0.540659	0.209562	-2.57995	0.00988141	0.0636762
chr3L:35111593-35115006	NM_001087101	dusp1.L	935.897	803.248	757.997	956.705	1020.47	1007.91	1069.06	0.277991	0.107764	2.57964	0.00989045	0.0636878
chr6S:55434868-55495888	NM_001087301	sdha.S	488.931	517.27	555.61	560.316	423.263	472.736	404.391	-0.300736	0.116597	-2.57928	0.00990075	0.0637076
chr8L:55851660-55883244	NM_001086622	akt2.L	2836.24	2444.71	2788.55	2598.75	3141.42	3058.42	2985.61	0.220295	0.0854226	2.57889	0.00991186	0.0637325
chr9_10L:43812729-43819182	NM_001086990	kpna2.L	3655.94	3286.5	3204.78	3629.55	3991.43	3898.84	3924.53	0.214281	0.0831349	2.57751	0.00995143	0.0638472
chr2L:23420280-23468445	NM_001093052	gbe1.L	47.5828	77.9939	47.7328	59.2731	34.7887	36.6693	29.0387	-0.533838	0.207092	-2.57779	0.00994356	0.0638472
chr8S:65919299-65923593	NM_001171665	rpl39.S	1037.59	901.861	749.405	1097.48	1170.06	1101.07	1205.65	0.308998	0.119879	2.57759	0.00994913	0.0638472
chr2S:127040040-127043710	NM_001088825	LOC398389	222.554	278.806	238.664	250.984	177.423	175.418	214.026	-0.378347	0.146826	-2.57685	0.00997064	0.0639238
chr8L:1713848-1727758	NM_001088044	ptgds.L	9.60683	4.48241	34.3676	10.1876	2.31925	1.98212	4.30204	-0.440512	0.170974	-2.57648	0.00998115	0.0639447
chr6S:58090557-58108922	NM_001091867	fam206a.S	618.161	550.44	583.295	522.344	619.24	719.511	714.138	0.287599	0.111642	2.57608	0.00999263	0.0639717
chr8L:57383105-57395684	NM_001095749	MGC85068	138.977	170.332	202.387	125.955	121.761	108.026	105.4	-0.449677	0.174584	-2.5757	0.0100036	0.0639957
chr4L:127346274-127382371	NM_001096185	uroc1.L	1263.35	1446.92	1331.75	1365.13	1185.14	1222.97	1028.19	-0.254494	0.0989026	-2.57318	0.010077	0.0644182
chr3L:43585959-43620846	NM_001094388	nedd1.L	271.109	268.945	357.041	307.479	220.329	256.685	216.177	-0.370544	0.144019	-2.57289	0.0100853	0.0644245
chr2S:136197759-136204724	NM_001159687	zar2.S	113.348	123.715	186.158	107.432	73.0564	83.2492	106.475	-0.484854	0.188475	-2.5725	0.0100966	0.0644496
chr9_10S:16282809-16313375	NM_001088192	myt1.S	66.0767	50.203	49.6421	49.0855	99.7277	70.3654	77.4367	0.504001	0.195966	2.57188	0.0101147	0.0645191
chr3S:19652864-19698643	NM_001099869	prkaca.S	488.518	550.44	547.973	539.015	432.54	483.638	377.504	-0.30918	0.120332	-2.5694	0.0101875	0.0649361
chr2S:56789249-56798610	NM_001092319	psma5.S	1222.18	1077.57	1169.45	1091.92	1269.79	1299.28	1425.05	0.244919	0.095345	2.56876	0.0102062	0.0650085
chr4L:11340040-11375646	NM_001091496	nup160.L	677.481	740.494	761.816	728.874	634.315	603.556	595.832	-0.265407	0.103344	-2.56819	0.0102232	0.0650694
chr2S:65683066-65695308	NM_001087052	trappc3.S	368.597	474.239	421.958	363.048	323.535	357.773	271.028	-0.354164	0.137924	-2.56782	0.0102341	0.0650916
chr5S:7234044-7253763	NM_001095512	kcnk5.S	137.255	135.369	194.75	161.149	96.2489	108.026	127.986	-0.443725	0.172948	-2.56566	0.010298	0.0654512
chr6L:106687079-106700121	NM_001087310	myl12b.L	712.984	617.676	630.073	669.601	869.719	755.189	735.648	0.278236	0.10852	2.56391	0.0103501	0.0656865
chr5L:88328321-88384397	NM_001091554	snx14.L	82.5251	102.199	123.151	83.3528	51.0235	51.5352	83.8897	-0.50213	0.195896	-2.56325	0.0103696	0.0656865
chr3S:10320033-10372692	NM_001092002	cyfip2.S	172.273	233.982	181.385	188.007	135.676	152.623	141.967	-0.405823	0.158325	-2.56323	0.0103702	0.0656865
chr5S:70401388-70407574	NM_001095695	ripply2.2.L	370.354	376.522	221.48	339.894	400.071	428.138	456.016	0.385863	0.150542	2.56316	0.0103723	0.0656865
chr1S:115598842-115617628	NM_001096443	acin1.S	5134.65	4437.59	4623.4	5095.63	5574.32	5184.24	5892.71	0.22373	0.0872758	2.56348	0.0103628	0.0656865
chr4S:11783077-11794903	NM_001086214	psmc3.S	745.973	847.176	757.043	858.533	665.625	708.609	638.852	-0.271277	0.105858	-2.56265	0.0103876	0.0657319
chr2L:29417300-29427138	NM_001086911	tbl2.L	1369.79	1161.84	1277.33	1270.67	1379.95	1423.16	1705.76	0.263915	0.102999	2.5623	0.0103981	0.0657319
chr8L:38324906-38330717	NM_001171666	rpl39.L	1352.71	1197.7	958.475	1433.67	1543.46	1432.08	1550.88	0.305278	0.119148	2.56218	0.0104019	0.0657319
chr9_10L:111256912-111310048	NM_001095657	LOC733426	1715.97	2004.53	1824.35	1787.45	1686.09	1587.68	1405.69	-0.24894	0.0972218	-2.56054	0.010451	0.065995
chr9_10S:34480871-34485607	NM_001092920	mettl23.S	162.643	129.99	148.926	128.734	202.934	181.364	183.912	0.400795	0.156562	2.55998	0.0104677	0.0660528
chr4L:110170368-110222243	NM_001091591	imp3.L	1270.76	1111.64	1109.31	1240.1	1477.36	1406.32	1279.86	0.251283	0.0981985	2.55893	0.0104994	0.0661583
chr2S:109059721-109063830	NM_001096595	klf5.S	360.28	470.653	293.08	492.707	267.873	332.997	304.369	-0.39723	0.155218	-2.55917	0.0104923	0.0661583
chr5S:118143189-118145541	NM_001094170	id2.S	2445.39	2005.43	1878.76	2666.36	2792.38	2635.23	2694.15	0.286682	0.112044	2.55867	0.0105074	0.0661615
chr8S:38061621-38125298	NM_001136163	l1cam.S	9.73917	28.6874	6.68259	13.8921	0	5.94637	3.22653	-0.442667	0.173033	-2.55829	0.0105189	0.0661867
chr6S:42800077-42807923	NM_001091255	rpl14.S	1336.31	1210.25	1087.35	1339.2	1436.78	1469.74	1474.52	0.253045	0.0989453	2.55743	0.0105449	0.0663028
chr2S:107200477-107251556	NM_001085999	rbm26.S	2559.8	2293.2	2380.91	2420.93	2718.16	2672.89	2872.69	0.211294	0.0826321	2.55704	0.0105567	0.0663266
chr1L:184379840-184383726	NM_001093433	rps23.L	2778.96	2616.83	2227.21	2754.35	2900.22	3021.75	3153.39	0.242687	0.0949178	2.55681	0.0105638	0.0663266
chr9_10S:13621-25967	NM_001088741	mapre1.S	3888.07	3605.65	3431.99	3772.18	4112.03	4173.36	4233.2	0.203941	0.0798451	2.55421	0.010643	0.0667764
chr4L:10047206-10060072	NM_001086776	ccnd1.L	1195.47	1095.5	1002.39	1142.86	1241.96	1233.87	1456.24	0.261484	0.102442	2.55252	0.0106948	0.0670536
chr4L:79045120-79250333	NM_001088518	ptprf.L	673.067	860.623	754.179	639.038	578.653	564.905	641.003	-0.307323	0.120517	-2.55003	0.0107713	0.0674853
chr6S:38129550-38166672	NM_001094478	ube2e2	822.868	687.602	895.468	577.913	923.061	920.696	932.466	0.325362	0.127709	2.54768	0.0108442	0.0678939
chr4L:114857902-114868838	NM_001086876	eif3l.L	4127.74	3772.4	3743.21	3956.48	4494.71	4596.54	4203.09	0.204789	0.080407	2.54691	0.0108682	0.067996
chr4L:3469063-3472065	NM_001087087	dhcr7.L	1144.69	866.002	1201.91	953.926	1327.77	1089.18	1429.35	0.315244	0.123815	2.5461	0.0108935	0.0681054
chr7L:90317344-90320524	NM_001112851	LOC728026.L	22689.5	20074.9	20557.6	22402.4	25778.5	24280	23043.9	0.205689	0.0808353	2.54454	0.0109421	0.068361
chr8L:10930141-11027166	NM_001086997	mapkap1.L	205.234	244.74	240.573	225.979	191.338	142.713	186.063	-0.385923	0.151712	-2.54378	0.0109659	0.0684235
chr9_10L:2619498-2631522	NM_001090785	pip4k2b.L	1251.28	1443.34	1329.84	1316.97	1084.25	1105.03	1228.23	-0.245104	0.0963563	-2.54373	0.0109677	0.0684235
chr4S:45134129-45139865	NM_001092031	MGC80249	2106.32	2015.29	1812.89	1965.27	2251.99	2157.54	2434.95	0.228933	0.0900293	2.54287	0.0109946	0.0685431
chr1S:88063020-88072621	NM_001086576	oaz1.S	4121.51	3805.57	3804.31	3893.5	4326.56	4388.42	4510.69	0.19452	0.0766183	2.53882	0.0111227	0.0692619
chr1S:124853805-124859768	NM_001086665	rplp0.S	1175.49	1073.99	1071.12	1078.03	1203.69	1340.91	1285.23	0.236631	0.0932084	2.53873	0.0111256	0.0692619
chr3L:106942934-106950165	NM_001093656	selenos.L	530.739	461.688	388.545	543.645	561.258	580.762	648.532	0.324648	0.127892	2.53846	0.0111342	0.0692662
chr8S:78144148-78158711	NM_001122879	wdr46.S	363.888	305.7	318.855	330.633	453.413	412.282	362.447	0.325298	0.128171	2.538	0.0111488	0.0693082
chr4L:3008479-3333127	NM_001349443	nell1.L	28.1132	16.1367	20.0478	18.5228	33.6291	41.6246	38.7183	0.538275	0.212129	2.53749	0.011165	0.0693603
chr4L:72125161-72150308	NM_001091382	ankrd13c.L	63.0605	72.615	113.604	57.4208	31.3099	48.562	54.851	-0.523017	0.206212	-2.5363	0.0112029	0.0695465
chr1S:4833152-4864154	NM_001085784	htr7.L	7.79667	9.8613	14.3198	14.8183	4.6385	0.991061	2.15102	-0.443102	0.174769	-2.53536	0.0112331	0.0696848
chr4L:66959358-66964197	NM_001092487	gng5.L	2539.07	2523.6	2294.04	2121.79	2504.79	2919.67	2870.53	0.243653	0.0961483	2.53414	0.0112723	0.0698788
chr5L:17764-83357	NM_001090411	snap25.L	23.963	13.4472	20.0478	10.1876	39.4272	32.705	27.9632	0.535202	0.211256	2.53343	0.0112952	0.0699466
chr4S:22943048-22951643	NM_001091151	MGC81040	513.733	604.229	524.106	583.469	459.211	424.174	487.206	-0.295176	0.116518	-2.53331	0.0112991	0.0699466
chr1L:202065108-202158846	NM_001094462	nipbl.S	2705.07	2476.98	2385.69	2611.72	2791.22	2852.27	3112.52	0.218459	0.0863202	2.5308	0.0113802	0.0703498
chr9_10L:114806392-114824186	NM_001096372	thoc6.L	998.827	830.142	839.143	1028.94	1092.37	1113.95	1088.42	0.268882	0.10624	2.53089	0.0113773	0.0703498
chr2L:98461318-98593881	NM_001093274	castor2.L	220.496	192.744	160.382	209.308	247	271.551	241.99	0.373959	0.147822	2.5298	0.0114128	0.0705017
chr6S:84342075-84357577	NM_001086951	tgif1.S	246.883	307.493	258.712	276.916	220.329	208.123	209.724	-0.35307	0.139607	-2.52903	0.0114377	0.0705565
chr6L:9273302-9318175	NM_001091636	ttc21a.L	36.9519	19.7226	23.8664	31.4888	46.385	60.4547	39.7938	0.533574	0.210964	2.52923	0.0114315	0.0705565
chr3S:48377004-48387752	NM_001091856	nmrk2.S	375.554	351.421	319.81	316.741	379.197	467.781	418.373	0.322242	0.127433	2.52872	0.0114478	0.0705697
chr8L:70809812-70818048	NM_001086365	gnpnat1.L	368.366	305.7	263.485	383.423	418.625	390.478	448.487	0.351204	0.138901	2.52845	0.0114567	0.0705747
chr2L:59855259-59871980	NM_001092115	pafah2.L	23.3339	28.6874	40.0956	28.7104	12.7559	16.848	12.9061	-0.534131	0.21137	-2.527	0.0115043	0.0708186
chr7S:21589182-21822373	NM_001087109	slit1.S	13.9407	29.5839	12.4105	21.3013	5.79812	5.94637	8.60407	-0.500855	0.198233	-2.5266	0.0115174	0.0708495
chr6S:102723554-102732879	NM_001086327	rmdn1.S	348.76	284.185	287.352	342.672	367.601	393.451	417.298	0.328248	0.129954	2.52588	0.011541	0.070896
chr2S:27742720-27765226	NM_001091256	MGC81152	888.874	877.656	1242.96	878.909	696.935	847.357	789.424	-0.324282	0.12838	-2.52595	0.0115385	0.070896
chr9_10L:32704535-32720874	NM_001095558	ahcy.L	1024.02	1340.24	996.661	1096.55	945.094	1001.96	763.612	-0.309712	0.122629	-2.5256	0.01155	0.0709016
chr6L:116313956-116382201	NM_001085646	lyn.L	43.4852	60.9608	55.3701	51.8639	28.9906	34.6871	29.0387	-0.522114	0.20677	-2.52509	0.0115668	0.0709127
chr2L:177408556-177413204	NM_001086357	tmem126a.L	341.609	266.255	329.356	300.996	369.92	389.487	393.636	0.32626	0.129233	2.52459	0.0115832	0.0709127
chr9_10L:37009262-37014024	NM_001086596	h3f3b	15005.5	16912.1	15691.7	16006.5	12495	13674.7	15252.9	-0.220579	0.0873729	-2.52457	0.011584	0.0709127
chr6S:46023755-46069553	NM_001174035	ezh2.S	491.874	518.167	610.025	513.083	427.902	440.031	442.034	-0.297388	0.117784	-2.52486	0.0115743	0.0709127
chr5L:122954452-123001077	NM_001095525	pax3.L	615.48	676.844	423.867	499.19	713.169	707.618	672.193	0.342199	0.135562	2.5243	0.0115928	0.0709174
chr1L:177398660-177407613	NM_001093109	c5orf30.L	122.314	137.162	143.198	153.74	100.887	89.1955	109.702	-0.428197	0.169648	-2.52403	0.0116016	0.0709222
chr7L:73660971-73678252	NM_001096230	hmbs.L	536.308	576.438	672.078	547.35	444.136	451.924	525.924	-0.306165	0.121322	-2.52358	0.0116167	0.0709652
chr7S:87301032-87309229	NM_001085566	casp9.S	65.4858	43.0311	67.7806	27.7843	89.2911	108.026	57.002	0.524747	0.207986	2.523	0.011636	0.0710336
chr8L:60028578-60033311	NM_001096701	LOC779015	2048.79	1876.34	1796.66	1976.39	2075.73	2285.39	2282.23	0.223369	0.0885454	2.52265	0.0116473	0.0710536
chr5S:100590584-100625656	NM_001087030	pcolce2.S	28.3752	23.3085	11.4559	19.449	35.9484	44.5978	35.4918	0.534883	0.212154	2.5212	0.0116955	0.0712844
chr5L:141922397-141992564	NM_001090081	smc6.L	593.046	598.85	738.904	634.407	529.949	517.334	538.83	-0.289109	0.114679	-2.52102	0.0117014	0.0712844
chr5S:42433639-42456388	NM_001092473	sccpdh.S	118.746	155.091	140.334	127.808	95.0892	107.035	87.1162	-0.433982	0.17217	-2.52066	0.0117134	0.0713083
chr4S:91881870-91899874	NM_001086073	aldh9a1.S	688.408	805.937	644.393	856.681	590.249	673.922	559.265	-0.307966	0.122332	-2.51747	0.0118201	0.0715088
chr4S:87928751-87934777	NM_001087261	rpsa.S	5486.56	5419.23	3967.55	5441.08	5856.11	6142.6	6092.76	0.267629	0.10633	2.51696	0.0118372	0.0715088
chr4L:127811419-127841809	NM_001087418	chst13.L	139.216	110.267	133.652	100.023	165.826	155.597	169.93	0.417706	0.165969	2.51676	0.0118439	0.0715088
chr4L:96480867-96488919	NM_001087646	gtf2b.L	1746.37	1636.98	1532.22	1649.46	1900.63	1956.36	1802.55	0.221602	0.0880546	2.51664	0.0118479	0.0715088
chr4L:54607254-54642966	NM_001090065	slc7a5.L	518.003	590.782	540.336	638.112	500.958	328.041	509.791	-0.353577	0.140372	-2.51885	0.011774	0.0715088
chr5L:7232170-7255656	NM_001091873	ppm1b.L	1623.53	1809.1	1884.49	1629.08	1313.85	1581.73	1522.92	-0.252091	0.100139	-2.51742	0.0118219	0.0715088
chr5S:6196613-6203897	NM_001093155	hsp90ab1.S	56516.1	54323.2	45792	55564.8	64491.4	61498.3	57426.8	0.22549	0.0895078	2.51922	0.0117616	0.0715088
chr3L:84957342-84978822	NM_001094266	rbpms2.L	312.806	391.763	384.727	295.439	237.723	298.309	268.877	-0.358458	0.142341	-2.5183	0.0117924	0.0715088
chr4S:18490982-18522941	NM_001095555	arntl.S	71.2535	90.5447	95.4656	77.7959	56.8216	45.5888	61.304	-0.486595	0.19336	-2.51653	0.0118518	0.0715088
chr1S:119677240-119685296	NM_001097702	sds.S	21.7896	26.8945	41.0502	25.0058	8.11737	17.8391	11.8306	-0.527261	0.209396	-2.518	0.0118022	0.0715088
chr7L:57808286-57828744	NM_001097719	nmnat1.L	106.997	141.644	120.287	121.325	86.9719	92.1687	79.5877	-0.442212	0.175541	-2.51914	0.0117641	0.0715088
chr8L:60028567-60033312	NM_001098443	tmed10.L	2052.77	1880.82	1798.57	1981.94	2080.37	2288.36	2286.53	0.222916	0.0885728	2.51675	0.0118441	0.0715088
chr1L:152126617-152144367	NM_001112871	rab36.L	48.111	36.7558	19.0931	43.5287	81.1737	56.4905	51.6244	0.52844	0.209854	2.51813	0.011798	0.0715088
chr3L:9451204-9466459	NM_001087229	g3bp1.L	8209.96	7556.45	7373.77	7982.42	9079.86	8810.54	8456.73	0.194535	0.0773267	2.51576	0.0118777	0.0716155
chr8S:83795774-83851593	NM_001093561	actn4.S	684.348	821.178	670.169	776.107	633.155	620.404	585.077	-0.280336	0.111466	-2.51498	0.011904	0.0717251
chr9_10S:103679950-103694195	NM_001092435	MGC82715	293.248	378.315	293.08	328.78	277.15	235.873	246.292	-0.350336	0.13933	-2.51443	0.0119224	0.0717851
chr1L:196000670-196032292	NM_001093350	snx18.L	596.812	638.295	730.312	613.106	561.258	504.45	533.453	-0.285763	0.113659	-2.5142	0.0119302	0.0717851
chr9_10L:3527412-3535064	NM_001090649	hoxb7.L	80.7003	62.7537	54.4154	63.9038	140.315	96.1329	66.6816	0.499283	0.198643	2.51347	0.0119549	0.0717905
chr4L:82731499-82742678	NM_001091145	pomgnt1.L	53.7216	77.0975	67.7806	63.9038	40.5869	52.5263	20.4347	-0.522662	0.207922	-2.51374	0.0119459	0.0717905
chr5L:60466123-60472655	NM_001096942	map1lc3c.L	20.3742	14.3437	66.8259	12.0398	10.4366	8.91955	9.67958	-0.492475	0.195936	-2.51345	0.0119556	0.0717905
chr4L:64923392-64951818	NM_001091640	csnk2a2.L	2275.34	2061.01	2098.33	2054.18	2699.61	2597.57	2141.34	0.24502	0.0974994	2.51304	0.0119696	0.0718258
chr4S:32210078-32232653	NM_001093578	cbfb.S	994.099	1173.5	1071.12	1020.61	856.963	971.24	871.162	-0.257075	0.102306	-2.5128	0.0119778	0.071826
chr8L:64821331-64838078	NM_001092190	atxn3.L	125.196	168.539	151.79	125.029	102.047	95.1419	108.626	-0.431126	0.171686	-2.51113	0.0120345	0.0721167
chr4S:7539742-7590578	NM_001127786	lsp1.S	3167.67	2742.34	3130.32	2730.27	3997.23	3115.9	3289.98	0.256862	0.102344	2.5098	0.0120798	0.0723394
chr1S:160504978-160515260	NM_001127804	mcidas	642.775	376.522	290.216	662.191	917.263	714.555	895.899	0.527075	0.210093	2.50878	0.012115	0.0725009
chr8S:55997179-56032432	NM_001096619	cul4b.S	1051.61	1160.94	1195.23	1078.96	926.54	943.49	1004.53	-0.242746	0.0967751	-2.50835	0.0121297	0.0725397
chr2L:145014082-145030265	NM_001095495	atf1.L	333.656	405.21	343.676	391.758	309.62	227.944	323.728	-0.355458	0.141731	-2.50799	0.0121421	0.0725646
chr9_10L:46001588-46004944	NM_001086957	tsn.L	479.833	588.092	542.245	477.889	382.676	444.987	443.11	-0.307697	0.122716	-2.50739	0.0121627	0.0726382
chr1S:84013532-84033756	NM_001095980	ap1m1.S	684.432	792.49	749.405	717.76	569.376	658.065	619.493	-0.270038	0.107745	-2.50627	0.0122012	0.0728189
chr1S:118338892-118361882	NM_001087199	thoc5.S	1412.41	1212.04	1312.65	1358.65	1546.94	1483.62	1560.56	0.229657	0.091668	2.50531	0.0122343	0.072967
chr5L:80716896-80812199	NM_001091862	atg5.L	92.6886	123.715	126.969	88.9096	59.1409	71.3564	86.0407	-0.471986	0.188414	-2.50504	0.0122436	0.0729729
chr1S:70706982-70723673	NM_001095181	ccni.S	150.814	72.615	166.11	117.62	172.784	197.221	178.535	0.464237	0.185398	2.504	0.0122797	0.0731384
chr1S:27951371-27956090	NM_001090489	zar1.S	272.304	342.456	307.399	283.399	240.042	262.631	197.894	-0.358881	0.143343	-2.50364	0.0122922	0.0731632
chr3L:24763815-24778269	NM_001093454	hnrnph1.L	7241.01	6903.81	6731.28	6623.77	7449.43	7915.61	7822.18	0.188494	0.0753113	2.50286	0.0123193	0.0732753
chr6L:95794788-95877961	NM_001091364	pqlc1.1.L	325.567	216.949	225.299	374.161	401.23	364.711	371.051	0.397173	0.158732	2.50216	0.0123437	0.073371
chr4L:1939310-1957545	NM_001092390	copb1.L	1226.5	1082.05	1000.48	1249.37	1379.95	1296.31	1350.84	0.256129	0.102375	2.50187	0.012354	0.0733828
chr7L:54096812-54109861	NM_001085994	cldnd1.L	350.222	307.493	319.81	299.144	396.592	408.317	369.975	0.310629	0.124222	2.5006	0.0123984	0.0735891
chr9_10L:92700108-92705936	NM_001094453	coq7.L	258.783	346.042	255.848	289.882	212.211	249.747	198.969	-0.37023	0.148069	-2.5004	0.0124055	0.0735891
chr3L:14366306-14375090	NM_001086451	sqstm1.L	381.332	422.243	417.185	438.991	304.981	351.827	352.767	-0.307873	0.123238	-2.49819	0.0124829	0.0739128
chr8S:98054907-98058949	NM_001086487	pygo2.S	785.843	652.639	701.672	756.658	869.719	964.303	770.065	0.280502	0.112285	2.49813	0.0124852	0.0739128
chr8L:49823400-49839493	NM_001096129	ccdc61.L	389.525	257.29	403.82	344.525	430.221	466.79	434.506	0.354275	0.14179	2.49858	0.0124691	0.0739128
chr7L:29604-57602	NM_001088867	cat1.L	51.2109	37.6522	21.9571	49.0855	56.8216	78.2938	63.455	0.519199	0.20803	2.49579	0.0125677	0.0743141
chr4L:26695636-26708088	NM_001092755	ubxn1.L	81.1433	61.8573	51.5514	75.9436	90.4507	107.035	100.022	0.472881	0.189476	2.49573	0.0125699	0.0743141
chr2L:58263764-58284947	NM_001091481	wdtc1.L	170.453	232.189	194.75	172.262	157.709	149.65	116.155	-0.409605	0.164142	-2.49543	0.0125805	0.0743268
chr8L:112356332-112390501	NM_001093019	copa.L	2432.86	2104.94	2212.89	2382.04	2596.4	2830.47	2470.44	0.226062	0.0908123	2.48933	0.0127984	0.0754122
chr6S:7027697-7088154	NM_001093467	oxsr1	683.408	630.227	583.295	639.038	758.395	720.502	768.989	0.260447	0.104616	2.48956	0.0127902	0.0754122
chr7L:13409855-13421788	NM_001094598	gabarapl1.L	16.1461	5.37889	13.3652	7.40913	24.3521	23.7855	22.5857	0.507922	0.204035	2.48939	0.0127964	0.0754122
chr8L:682156-684803	NM_001095365	pqbp1.L	950.244	756.631	937.473	880.761	1019.31	1030.7	1076.58	0.262046	0.105245	2.48985	0.0127796	0.0754122
chr1L:57430332-57448496	NM_001089677	plk4.L	516.445	484.1	420.049	480.668	557.78	581.753	574.322	0.283407	0.11393	2.48755	0.0128625	0.0756887
chr9_10S:26529073-26535111	NM_001091186	zswim1.S	246.867	289.564	272.077	279.695	222.648	190.284	226.932	-0.347513	0.1397	-2.48757	0.012862	0.0756887
chr9_10S:70789930-70825694	NM_001087591	abi2.S	929.543	848.072	848.69	849.272	983.362	996.017	1051.85	0.238145	0.0958455	2.48467	0.0129672	0.0762534
chr8L:49058525-49068015	NM_001097091	slc1a5.L	576.87	657.121	642.484	603.844	510.235	530.218	517.32	-0.268706	0.108171	-2.48408	0.0129885	0.076328
chr1L:99071915-99093044	NM_001094054	mllt1.L	270.189	303.011	313.127	306.553	207.573	272.542	218.328	-0.349057	0.140542	-2.48366	0.0130042	0.0763691
chr8L:82110565-82197637	NM_001093073	mapkbp1.L	126.864	90.5447	97.375	121.325	171.624	130.82	149.496	0.430098	0.173221	2.48295	0.01303	0.07647
chr5S:101989160-102016804	NM_001097039	plscr2.S	2011.57	2244.79	2040.1	2213.48	1867	1855.27	1848.8	-0.21278	0.0857332	-2.48188	0.0130691	0.0765973
chr2L:154020102-154035563	NM_001171716	ufm1.L	369.199	458.102	358.951	428.804	345.568	303.265	320.502	-0.324886	0.130902	-2.4819	0.0130683	0.0765973
chr4L:121701973-121709205	NM_001127764	tmem115.L	153.522	171.228	184.249	183.376	104.366	133.793	144.118	-0.40413	0.162858	-2.48149	0.0130835	0.0766308
chr3L:77995134-78011333	NM_001094596	irf5.L	231.508	261.773	305.49	233.388	187.859	171.454	229.083	-0.377199	0.15223	-2.47782	0.0132189	0.0773724
chr3L:52321063-52337487	NM_001089933	rab21.L	104.594	119.232	165.156	100.023	59.1409	87.2134	96.7958	-0.472204	0.190608	-2.47736	0.0132358	0.0774195
chr3L:141342445-141363390	NM_001086977	plod3.L	1156.21	1178.87	947.019	982.636	1435.62	1235.85	1157.25	0.277299	0.111957	2.47684	0.0132552	0.0774817
chr4L:135922396-135982039	NM_001112889	rybp.L	513.073	420.45	457.28	488.077	598.366	504.45	609.814	0.29716	0.119991	2.47652	0.0132669	0.0774988
chr1S:129512766-129529434	NM_001093618	rnf113a.S	1073.63	1038.13	922.198	978.932	1126	1165.49	1211.02	0.23902	0.0965505	2.4756	0.0133013	0.0776482
chr9_10L:90593902-90634286	NM_001114823	cpped1.L	76.1811	91.4412	103.103	84.2789	61.4601	55.4994	61.304	-0.468457	0.189259	-2.47522	0.0133154	0.0776793
chr6S:2677263-2728570	NM_001091808	scap.S	150.892	179.296	177.566	169.484	119.441	121.901	137.665	-0.393506	0.159002	-2.47485	0.0133291	0.0777075
chr1L:216906298-216914463	NM_001096166	stoml2.L	498.9	623.055	447.734	630.703	506.756	365.702	419.449	-0.348845	0.140969	-2.47462	0.0133379	0.0777075
chr4L:48692068-48704031	NM_001091408	alg13.L	116.713	69.9256	126.969	79.6482	125.239	144.695	153.798	0.459017	0.185554	2.47376	0.01337	0.0778171
chr9_10L:52402720-52407038	NM_001094955	cryba2.S	50.8589	30.4804	22.9118	50.9378	90.4507	42.6156	67.7571	0.521365	0.210768	2.47364	0.0133744	0.0778171
chr1S:84710830-84715515	NM_001087364	rps15.L	2056.83	2020.67	1558	2005.1	2269.39	2161.5	2326.33	0.257234	0.104025	2.47281	0.0134054	0.0779123
chr8S:72446588-72461215	NM_001097047	taf9b.L	586.99	438.38	505.968	597.361	622.719	590.673	766.838	0.322911	0.130589	2.47273	0.0134084	0.0779123
chr1S:70295163-70331858	NM_001094777	scarb2.S	113.398	143.437	144.153	116.694	85.8122	89.1955	101.098	-0.431181	0.174397	-2.4724	0.0134208	0.0779326
chr2S:41264493-41265951	NM_001085758	kcna3.S	26.9412	31.3769	47.7328	31.4888	23.1925	13.8749	13.9816	-0.523812	0.211904	-2.47193	0.0134386	0.0779764
chr5S:78675849-78687146	NM_001092520	tmem14a.S	91.7475	39.4452	106.922	50.9378	74.216	146.677	132.288	0.512138	0.207223	2.47144	0.0134571	0.0779764
chr4L:21939514-21974119	NM_001093503	pola2.L	827.081	902.757	874.465	926.142	753.756	774.019	731.346	-0.244004	0.0987395	-2.4712	0.0134662	0.0779764
chr5L:123478360-123483768	NM_001093846	polr2d.L	1957.25	1862.89	1851.08	1670.76	1956.29	2228.9	2173.6	0.228254	0.0923629	2.47127	0.0134634	0.0779764
chr2L:21794129-21815319	NM_001094283	chmp2b.L	529.892	519.96	557.519	710.351	509.075	410.299	472.149	-0.323859	0.131068	-2.47093	0.0134763	0.0779764
chr8L:87299648-87349535	NM_001099893	galnt16.L	156.532	141.644	89.7377	151.887	173.944	187.311	194.667	0.424789	0.171929	2.47072	0.013484	0.0779764
chr1S:140065105-140080355	NM_001099908	prrc1.S	848.534	785.318	677.806	834.454	904.507	940.517	948.599	0.262923	0.106422	2.47056	0.0134903	0.0779764
chr6L:44180850-44308381	NM_001094637	ube2e2.L	68.2911	66.3397	115.513	75.0175	53.3427	43.6067	55.9265	-0.495435	0.200576	-2.47006	0.0135092	0.0780344
chr2L:84429404-84452946	NM_001091979	ptp4a2.L	1533.8	1234.46	1601.91	1313.27	1549.26	1768.05	1735.87	0.265214	0.107418	2.46898	0.0135497	0.0782139
chr4S:32854816-32872648	NM_001171788	cmc2.S	186.714	216.949	204.296	221.348	161.188	160.552	155.949	-0.366775	0.148566	-2.46877	0.013558	0.0782139
chr7S:88318678-88338093	NM_001086268	slc35a3.2.S	1051.21	995.095	781.864	1048.39	1107.44	1151.61	1222.85	0.278195	0.112845	2.4653	0.01369	0.0789235
chr4L:50216905-50218303	NM_001096491	foxc2.L	750.758	827.453	577.567	573.282	829.132	884.027	813.085	0.316459	0.128432	2.46402	0.0137387	0.0791525
chr2S:137423809-137499336	NM_001092437	ubl3.S	98.6936	118.336	143.198	97.2449	86.9719	61.4458	84.9652	-0.459492	0.186571	-2.46282	0.0137848	0.0793663
chr1S:86475067-86484420	NM_001095973	timm10.S	439.584	473.343	295.943	369.531	482.404	518.325	497.961	0.345942	0.140568	2.46104	0.0138536	0.0797105
chr9_10L:48851246-48873548	NM_001087658	xrcc5.L	127.049	159.574	145.108	144.478	98.5681	119.918	94.6448	-0.415771	0.169018	-2.45993	0.0138965	0.0797487
chr6L:52280563-52286399	NM_001088752	eif1b.L	8043.27	7708.85	7074.96	7708.28	8599.78	8450.78	8717	0.189407	0.0769758	2.4606	0.0138704	0.0797487
chr2L:168195493-168219241	NM_001092283	smco4.L	280.854	363.075	294.989	305.627	234.244	202.177	285.01	-0.360983	0.146727	-2.46023	0.0138847	0.0797487
chr4S:62722347-62731267	NM_001093472	med8.S	354.715	379.212	462.054	369.531	300.343	254.703	362.447	-0.349294	0.14199	-2.45999	0.0138939	0.0797487
chr9_10L:28864699-28882511	NM_001091180	psme3.L	2988.56	3362.7	3022.44	3251.68	2671.78	2878.04	2744.7	-0.20738	0.0843371	-2.45894	0.0139346	0.0799155
chr3L:56100771-56112813	NM_001088700	prickle1.L	1043.83	1070.4	1452.99	973.375	950.892	885.018	930.315	-0.305902	0.12445	-2.45803	0.0139702	0.080037
chr2S:64852339-64865137	NM_001092107	fabp3.S	25.0969	12.5507	21.0024	10.1876	59.1409	20.8123	26.8877	0.512353	0.20845	2.45792	0.0139745	0.080037
chr3S:2886191-2923023	NM_001092110	kdm7a.L	359.533	317.355	277.805	349.155	396.592	442.013	374.277	0.32271	0.131331	2.45723	0.0140013	0.080037
chr4L:66965573-66975185	NM_001093436	rpf1.L	1548.06	1416.44	1253.46	1554.07	1716.24	1589.66	1758.46	0.245964	0.100089	2.45746	0.0139925	0.080037
chr6L:39557096-40005252	NM_001102666	tax1bp1.L	377.982	413.278	412.412	436.213	323.535	333.988	348.465	-0.297505	0.121063	-2.45744	0.013993	0.080037
chr3S:1706877-1723655	NM_001089813	ppara.S	353.338	381.901	433.414	380.644	262.075	346.871	315.124	-0.328329	0.13375	-2.4548	0.0140963	0.0805106
chr7L:126041187-126046017	NM_001092032	ndufa4.S	1167.54	1005.85	1107.4	1046.54	1130.63	1246.76	1468.07	0.264147	0.107621	2.45441	0.0141115	0.0805106
chr5S:119696583-119824395	NM_001161388	rock2.S	184.967	231.292	207.16	199.12	158.869	159.561	153.798	-0.369401	0.1505	-2.4545	0.014108	0.0805106
chr3S:30646625-30655784	NM_001092711	snrnp27.S	3406.62	3189.68	3236.29	3086.83	3599.48	3736.3	3591.13	0.192917	0.0786561	2.45266	0.0141804	0.0808515
chr1S:55105220-55109323	NM_001095364	ostc.S	745.805	714.496	605.252	699.237	792.024	807.715	856.105	0.262978	0.107243	2.45218	0.0141992	0.0809062
chr2S:92496442-92501305	NM_001091241	rpl31.L	1022.26	958.339	856.327	978.006	1056.42	1147.65	1136.81	0.243681	0.0993902	2.45176	0.0142158	0.0809482
chr9_10S:81794199-81799424	NM_001094700	thumpd1.S	2519.01	2917.15	2607.17	2626.54	2436.37	2334.94	2191.89	-0.217042	0.0885495	-2.45109	0.0142426	0.0810484
chr9_10L:41541270-41546559	NM_001086285	MGC64267	404.405	333.491	379.953	359.343	418.625	437.058	497.961	0.304289	0.124242	2.44916	0.0143189	0.0812321
chr5L:138346425-138352878	NM_001086698	odc1.L	29021.8	33532.9	29553.3	30146.8	26790.8	28159	25947.7	-0.197098	0.0804485	-2.44999	0.014286	0.0812321
chr3L:82374058-82394887	NM_001087113	pkm.L	2998.15	3538.41	3206.69	3062.75	2693.81	3080.22	2406.99	-0.245895	0.100401	-2.44912	0.0143206	0.0812321
chr7S:79973648-79981771	NM_001095109	ppp1r15b-b	545.759	433.001	451.552	555.685	553.141	577.789	703.383	0.31377	0.128114	2.44915	0.0143194	0.0812321
chr7S:62909523-62944607	NM_001096096	MGC115716	71.5893	90.5447	103.103	72.2391	67.2582	42.6156	53.7755	-0.482393	0.196967	-2.44911	0.014321	0.0812321
chr3S:58906785-58917328	NM_001086420	ubl7.S	529.783	549.544	604.297	600.14	453.413	503.459	467.847	-0.276063	0.11278	-2.44781	0.0143727	0.0813423
chr6L:25674904-25690792	NM_001087439	vim.L	948.156	989.716	792.365	768.698	1105.12	1056.47	976.562	0.275694	0.112634	2.44769	0.0143773	0.0813423
chr2S:130329109-130332738	NM_001088985	krt18.S	8202.03	6931.6	8348.47	7239.65	9539.07	7988.95	9164.41	0.232245	0.0948637	2.4482	0.0143573	0.0813423
chr8L:1991733-2001369	NM_001112873	coq4.L	129.312	77.0975	145.108	84.2789	133.357	158.57	177.459	0.456247	0.186393	2.44777	0.0143744	0.0813423
chr8L:79053988-79057673	NM_001088558	six1.L	249.716	252.808	147.972	226.905	284.108	273.533	312.973	0.390354	0.159561	2.44643	0.014428	0.0814844
chr1L:21256091-21267786	NM_001091222	lap3.L	587.816	756.631	599.524	626.998	510.235	606.53	426.977	-0.321894	0.13158	-2.44637	0.0144302	0.0814844
chr6L:53031414-53080005	NM_001096006	MGC114992	1325.84	1378.79	1581.87	1368.84	1142.23	1199.18	1284.16	-0.241008	0.0985136	-2.44644	0.0144275	0.0814844
chr1L:59278310-59296750	NM_001096430	adad1.L	96.2819	77.9939	83.0551	71.3129	117.122	123.883	104.324	0.43881	0.179435	2.44551	0.0144648	0.0816277
chr4L:60273344-60294490	NM_001093224	aktip.L	91.0424	98.613	150.836	87.0573	55.662	72.3475	81.7387	-0.475028	0.194274	-2.44515	0.0144792	0.0816566
chr2L:137428950-137445537	NM_001087060	prph.L	87.4304	79.7869	38.1863	80.5743	106.685	126.856	92.4938	0.484119	0.198281	2.44158	0.0146232	0.0823105
chr1L:137758907-137769031	NM_001090833	pck2.L	754.166	886.621	725.539	875.204	672.582	678.877	686.175	-0.267345	0.109496	-2.44159	0.0146228	0.0823105
chr1S:29825971-29839738	NM_001092779	paics.1.S	186.794	250.119	222.435	178.745	154.23	175.418	139.816	-0.390506	0.159929	-2.44175	0.0146162	0.0823105
chr3L:14891855-14901734	NM_001086291	no38	13903.6	12702.3	12151.8	13884.7	14769	15557.7	14355.9	0.198121	0.0811641	2.44099	0.0146471	0.0823398
chr3S:2957739-2971800	NM_001086884	ppp2ca.L	2975.14	2489.53	2863.97	2864.56	3274.78	3324.02	3034.01	0.218591	0.0895454	2.44112	0.0146419	0.0823398
chr4S:109467995-109511544	NM_001090157	arih2.S	358.812	448.241	391.409	374.161	307.301	272.542	359.22	-0.329051	0.134853	-2.44008	0.0146842	0.0823905
chr4L:53521042-53539378	NM_001093628	irf8.L	48.7449	72.615	84.9644	36.1195	25.5117	23.7855	49.4734	-0.516478	0.211648	-2.44027	0.0146764	0.0823905
chr6L:68124631-68160323	NM_001094796	cmbl.L	288.482	378.315	307.399	296.365	256.277	265.604	226.932	-0.342476	0.140349	-2.44018	0.01468	0.0823905
chr6L:49236598-49258196	NM_001095528	LOC496380	155.213	17.9296	34.3676	125.029	303.822	245.783	204.347	0.431703	0.176955	2.43962	0.0147027	0.0824419
chr3L:118862382-118906180	NM_001094133	zmiz2.S	2575.9	2422.29	2110.75	2520.96	3084.6	2631.27	2685.55	0.237716	0.0974659	2.43897	0.0147294	0.0825387
chr2S:54663719-54675404	NM_001090661	snrpc.S	6614.9	5849.55	6043.93	6525.6	7258.09	6696.6	7315.61	0.199535	0.0818511	2.43778	0.0147778	0.0827048
chr1S:83184259-83203736	NM_001092049	ppp1r3b.S	380.08	446.448	425.777	398.241	331.653	356.782	321.577	-0.299857	0.122995	-2.43797	0.0147699	0.0827048
chr9_10L:88349571-88365949	NM_001094562	nubp1.L	125.486	100.406	114.559	95.3926	150.751	134.784	157.024	0.410943	0.168592	2.43751	0.014789	0.0827151
chr9_10S:44416991-44469790	NM_001087322	bin1.S	212.188	258.187	269.213	204.677	191.338	187.311	162.402	-0.370305	0.151996	-2.43629	0.014839	0.0829419
chr8L:26874765-26893341	NM_001095614	xiap.L	205.338	222.328	250.12	232.462	157.709	183.346	186.063	-0.35882	0.147421	-2.43399	0.0149334	0.0834166
chr1L:119254465-119333073	NM_001088144	elavl2.L	71.7949	95.9236	85.9191	81.5005	54.5024	50.5441	62.3795	-0.466704	0.19177	-2.43366	0.014947	0.0834401
chr7L:14847101-14849377	NM_001085757	hmx3.L	38.8892	9.8613	17.1838	46.3071	51.0235	46.5799	62.3795	0.514574	0.211562	2.43226	0.015005	0.0835519
chr2S:109192247-109209625	NM_001092891	bora.S	1280.32	1307.97	1663.01	1253.07	1185.14	1133.77	1138.96	-0.267711	0.110049	-2.43265	0.0149889	0.0835519
chr1L:65901525-65971076	NM_001093309	gstcd.L	174.787	238.464	178.521	193.564	141.474	127.847	168.855	-0.394717	0.162283	-2.43227	0.0150044	0.0835519
chr4L:63574228-63659068	NM_001094812	fhod1.L	248.529	258.187	317.901	276.916	248.16	181.364	208.649	-0.360768	0.14829	-2.43285	0.0149805	0.0835519
chr4L:112569511-112602564	NM_001092085	srebf2.L	119.403	147.92	147.972	128.734	95.0892	114.963	81.7387	-0.423116	0.174221	-2.42862	0.0151564	0.0843414
chr8S:77878613-77882332	NM_001095410	zbtb9.S	102.868	77.9939	82.1004	90.7619	125.239	123.883	117.231	0.42646	0.175619	2.42833	0.0151687	0.0843566
chr2L:56441985-56444957	NM_001103185	pou3f1.L	35.3775	21.5156	25.7757	25.932	51.0235	52.5263	35.4918	0.511995	0.210873	2.42798	0.0151832	0.0843839
chr5L:53388377-53456821	NM_001095790	scaf8.L	1049.37	860.623	981.387	1023.39	1163.1	1104.04	1163.7	0.244291	0.100629	2.42763	0.0151977	0.0844115
chr6L:16902483-16910399	NM_001086788	klf6.L	475.513	421.347	357.996	482.52	529.949	533.191	528.075	0.302364	0.124667	2.42538	0.0152925	0.0848594
chr2L:132717869-132733648	NM_001093444	wbp4.L	441.463	481.411	545.109	460.292	398.911	322.095	440.959	-0.318444	0.131303	-2.42526	0.0152976	0.0848594
chr1L:119255446-119332887	NM_001087566	elavl2.L	70.8197	93.2341	85.9191	80.5743	53.3427	50.5441	61.304	-0.465383	0.191977	-2.42416	0.0153437	0.0850613
chr8S:15423413-15428772	NM_001171730	rps29.S	1175.98	1123.29	964.203	1128.04	1216.45	1304.24	1319.65	0.241232	0.0995436	2.42338	0.0153767	0.0851907
chr1S:113297026-113298912	NM_001086129	gadd45g.S	659.147	688.498	878.284	650.152	499.798	577.789	660.363	-0.313806	0.129556	-2.42217	0.015428	0.0854213
chr1S:166488421-166593667	NM_001092968	nipbl.L	1685.49	1482.78	1520.77	1658.72	1798.58	1808.69	1843.42	0.215105	0.0888438	2.42115	0.0154713	0.0856074
chr2L:148976155-148986025	NM_001092105	tarbp2.L	296.445	317.355	329.356	351.008	272.512	255.694	252.745	-0.316347	0.130676	-2.42086	0.0154839	0.0856231
chr1S:119198672-119209178	NM_001087933	tbx3.S	835.128	536.993	614.799	988.193	1050.62	866.188	953.977	0.361992	0.149566	2.42028	0.0155084	0.0857051
chr7S:85382156-85406021	NM_001086900	padi2.S	684.026	801.455	698.808	760.362	594.888	681.85	566.793	-0.271432	0.112189	-2.4194	0.0155459	0.0857772
chr1L:189319661-189327802	NM_001094947	bhmt.L	26.099	50.203	33.413	24.0797	20.8732	11.8927	16.1326	-0.511049	0.211239	-2.41929	0.0155507	0.0857772
chr4L:63283027-63344928	NM_001096479	lonp2.L	86.8743	124.611	104.058	89.8358	80.0141	74.3296	48.3979	-0.464651	0.192055	-2.41937	0.0155474	0.0857772
chr1L:35219132-35306747	NM_001089273	mtus1.L	381.626	286.874	291.17	410.281	420.944	395.433	485.055	0.345112	0.14281	2.41658	0.0156669	0.0863296
chr5S:17982392-17994153	NM_001097103	diexf.S	1178.04	1026.47	977.568	1204.91	1311.54	1327.03	1220.7	0.249401	0.103207	2.4165	0.0156704	0.0863296
chr2L:42173214-42190942	NM_001092615	arsd.L	75.4647	133.576	72.5539	75.9436	53.3427	61.4458	55.9265	-0.482903	0.19989	-2.41584	0.0156989	0.086432
chr6L:8531321-8554104	NM_001087135	acaa1.L	359.545	523.546	341.767	367.678	281.789	335.97	306.52	-0.356756	0.147792	-2.41391	0.0157825	0.0867302
chr4L:108042153-108057258	NM_001091698	ddx47.L	1819.24	1672.84	1638.19	1742.07	1912.22	1984.1	1966.03	0.205419	0.0850939	2.41402	0.0157775	0.0867302
chr5L:28516372-28530501	NM_001096337	c1d.L	713.186	642.778	589.978	689.05	785.066	708.609	863.634	0.271659	0.112523	2.41425	0.0157675	0.0867302
chr2L:85776635-85823297	NM_001095843	col9a2.L	126.691	87.8552	122.196	86.1312	122.92	225.962	115.079	0.463837	0.192182	2.41353	0.0157987	0.0867351
chr9_10L:104616904-104651882	NM_001097105	tbc1d24.1.L	390.369	464.378	448.688	395.463	358.324	366.693	308.671	-0.306259	0.126898	-2.41343	0.0158031	0.0867351
chr9_10L:37849528-37853557	NM_001087274	srsf2.L	41358.3	39806.5	35454	40332.6	43795.6	45321.2	43439.8	0.190463	0.0789292	2.41309	0.0158179	0.0867622
chr4L:36101465-36376874	NM_001166439	znf423.L	147.677	138.955	114.559	116.694	187.859	164.516	163.477	0.391726	0.162363	2.41266	0.0158366	0.0868106
chr8S:2734484-2807267	NM_001091370	MGC81191	948.069	883.035	820.05	892.801	1066.85	1054.49	971.185	0.237892	0.098643	2.41165	0.0158806	0.0868129
chr1L:163058257-163081494	NM_001091824	rnf34.L	435.871	549.544	530.789	394.536	340.93	387.505	411.92	-0.327527	0.135798	-2.41187	0.0158708	0.0868129
chr2S:158792498-158795925	NM_001095413	lrtomt.S	232.556	175.71	247.256	169.484	255.117	286.417	261.349	0.371523	0.154029	2.41203	0.0158638	0.0868129
chr2L:9793890-9799514	NM_001127833	LOC100158389	889.715	777.25	1283.06	968.744	766.512	651.127	891.597	-0.341496	0.14161	-2.41152	0.0158863	0.0868129
chr4L:122616242-122622871	NM_001171678	rpl29.L	721.093	604.229	539.381	765.919	800.141	727.439	889.446	0.305887	0.126805	2.41226	0.0158542	0.0868129
chr1S:96991232-97006833	NM_001089854	nipsnap3a.S	136.708	196.33	132.697	155.592	105.526	126.856	103.249	-0.417339	0.173149	-2.41029	0.0159399	0.0870242
chr6L:149416559-149455040	NM_001091784	ptp4a3.L	292.525	341.56	319.81	323.223	251.639	271.551	247.367	-0.315456	0.130885	-2.41018	0.0159447	0.0870242
chr3L:98353175-98404285	NM_001092096	man2a2.L	195.803	253.704	219.571	209.308	183.221	185.328	123.684	-0.388948	0.16144	-2.40924	0.0159858	0.0871944
chr4S:118106925-118118959	NM_001087182	thoc7.S	1306.48	1278.38	1163.73	1162.31	1399.67	1429.11	1405.69	0.220919	0.0917369	2.40818	0.0160322	0.0873558
chr7S:68022990-68134098	NM_001092573	dnajc11.S	246.779	205.294	218.616	219.496	296.864	284.435	255.971	0.33371	0.13859	2.40789	0.0160452	0.0873558
chr3L:138747200-138756958	NM_001097028	slc25a11.L	385.963	488.583	358.951	459.366	306.141	373.63	329.106	-0.328884	0.136576	-2.40807	0.0160371	0.0873558
chr9_10L:16588489-16599774	NM_001086562	stx16.L	416.064	373.833	379.953	361.195	480.085	453.906	447.412	0.282898	0.117516	2.40732	0.01607	0.0874369
chr4S:52289983-52303039	NM_001086803	bxdc5	1234.02	1055.16	1125.54	1214.17	1348.64	1328.02	1332.56	0.227444	0.0945219	2.40626	0.0161169	0.087584
chr1S:125438788-125464623	NM_001093241	eif4enif1.S	1015.55	1166.32	1214.32	964.114	847.686	954.392	946.448	-0.262564	0.109114	-2.40632	0.016114	0.087584
chr5S:130319875-130333714	NM_001086101	ctsb.S	10545.7	9412.17	10605.3	9433.68	11035	11316.9	11471.4	0.192379	0.0799849	2.40519	0.0161639	0.087731
chr1L:162206945-162247834	NM_001094381	ccdc62.L	43.9928	60.0643	63.962	47.2332	18.554	38.6514	35.4918	-0.5042	0.20962	-2.4053	0.016159	0.087731
chr3L:138542097-138582851	NM_001085842	efnb3.L	199.558	167.642	145.108	196.342	228.446	245.783	214.026	0.368194	0.153118	2.40464	0.0161886	0.087757
chr9_10L:3866115-3883784	NM_001095708	sdc4.L	823.343	994.199	918.379	796.482	724.766	751.224	755.007	-0.260437	0.108299	-2.4048	0.0161812	0.087757
chr9_10L:104691040-104702084	NM_001089206	atp6v0c.L	2974.81	3481.94	2980.44	3173.89	2553.49	2905.79	2753.3	-0.219268	0.0912009	-2.40424	0.0162063	0.0877992
chr9_10L:16370334-16377991	NM_001086075	MGC52717	639.568	610.504	536.517	582.543	749.118	702.662	656.061	0.264101	0.109887	2.40338	0.0162444	0.0878433
chr9_10L:24204106-24225138	NM_001091333	gps1.L	1733.61	1526.71	1654.42	1627.23	1898.31	1822.56	1872.46	0.20859	0.0867837	2.40357	0.0162361	0.0878433
chr5S:7571075-7648677	NM_001094166	zfand3.S	630.616	718.082	797.138	585.322	545.024	577.789	560.34	-0.290645	0.120921	-2.40359	0.0162348	0.0878433
chr9_10S:32154660-32184177	NM_001091958	ndrg4.S	323.782	241.154	283.533	320.445	352.526	407.326	337.71	0.332609	0.138425	2.40281	0.0162695	0.0878714
chr2S:56308274-56347511	NM_001095615	foxp4.S	244.561	238.464	156.564	225.979	310.779	252.721	282.859	0.373438	0.155409	2.40293	0.0162641	0.0878714
chr9_10S:17851139-17887955	NM_001085718	kcnj16.S	20.9338	16.1367	8.59191	12.966	26.6714	38.6514	22.5857	0.502788	0.209288	2.40237	0.016289	0.0879229
chr4S:50346057-50377892	NM_001087333	znrf1.S	219.346	274.324	249.165	227.831	168.146	192.266	204.347	-0.353384	0.147162	-2.40132	0.0163359	0.0881219
chr2L:148284609-148287088	NM_001085822	hoxc5.L	154.555	118.336	131.743	140.774	176.263	190.284	169.93	0.380819	0.15883	2.39765	0.0165007	0.0886753
chr2S:57132111-57139713	NM_001087371	gstm1.L	484.808	634.709	422.913	589.026	432.54	461.835	367.824	-0.335979	0.140112	-2.39793	0.0164882	0.0886753
chr9_10L:84786344-84811104	NM_001088112	fscn1.L	3587.78	4292.36	3917.91	3455.44	3315.37	3482.59	3063.05	-0.229416	0.0956458	-2.3986	0.0164581	0.0886753
chr1S:111457504-111486178	NM_001091017	cdc14b.S	445.948	529.821	490.693	463.997	434.859	388.496	367.824	-0.290198	0.121034	-2.39766	0.0165004	0.0886753
chr9_10S:33435225-33464180	NM_001092200	grb2.S	320.155	332.595	434.369	320.445	265.554	276.506	291.463	-0.335267	0.139795	-2.39828	0.0164722	0.0886753
chr9_10L:96837882-96875801	NM_001093133	kctd5.L	241.382	286.874	278.76	253.763	218.009	214.069	196.818	-0.334782	0.139635	-2.39755	0.0165052	0.0886753
chr3L:80595905-80620599	NM_001095385	etfa.L	35.1479	6.27537	39.1409	19.449	55.662	37.6603	52.7	0.504437	0.210404	2.39746	0.016509	0.0886753
chr5S:107156704-107236396	NM_001095176	gigyf2.S	461.341	357.696	445.825	427.878	507.916	498.504	530.226	0.291124	0.12147	2.39666	0.0165451	0.0888151
chr9_10S:13133930-13166854	NM_001088493	gata5.S	398.387	355.903	323.629	361.195	548.503	380.568	420.524	0.328584	0.137147	2.39584	0.0165823	0.0889605
chr3S:66069405-66083701	NM_001094010	kin.S	762.293	690.291	720.766	671.453	804.78	819.608	866.86	0.243004	0.101443	2.39548	0.0165987	0.0889945
chr1S:56174166-56187751	NM_001085586	pitx2.S	73.3584	42.1347	27.685	87.0573	104.366	71.3564	107.551	0.499937	0.208731	2.39513	0.0166145	0.0890248
chr8L:66260860-66275275	NM_001091122	thul16.L	135.732	90.5447	143.198	98.171	146.113	154.606	181.761	0.421594	0.176164	2.39319	0.0167025	0.0894419
chr4S:96133766-96150288	NM_001097073	mpst.S	124.284	182.882	151.79	111.137	83.493	110.999	105.4	-0.433157	0.181143	-2.39124	0.0167917	0.089865
chr4L:134775320-134784817	NM_001086443	tada3.L	267.375	320.941	338.903	252.837	243.521	207.132	240.914	-0.346984	0.145237	-2.38909	0.01689	0.0902266
chr4S:67475493-67507954	NM_001087451	mknk1.S	107.753	122.818	121.241	137.995	96.2489	83.2492	84.9652	-0.417216	0.174616	-2.38934	0.0168787	0.0902266
chr3L:80357866-80371003	NM_001094696	tcaf1.L	202.747	166.746	108.831	204.677	153.07	249.747	333.408	0.450236	0.188438	2.38931	0.0168801	0.0902266
chr7L:37857694-37864950	NM_001097745	ndufb8.L	98.7215	81.5799	81.1458	75.0175	136.836	95.1419	122.608	0.434324	0.181872	2.38808	0.0169368	0.0904218
chr6L:31925563-31942051	NM_001097974	mios.L	96.0976	98.613	119.332	126.881	76.5352	84.2402	70.9836	-0.433351	0.181511	-2.38746	0.0169655	0.0904654
chr3L:99628087-99676391	NM_001171211	fanci.L	64.8656	82.4764	78.2818	77.7959	55.662	46.5799	48.3979	-0.464619	0.194598	-2.38759	0.0169595	0.0904654
chr8S:93470473-93487774	NM_001086480	MGC68882	122.894	79.7869	90.6924	126.881	170.465	143.704	125.835	0.430577	0.180407	2.3867	0.0170005	0.0905976
chr1L:175104461-175191296	NM_001085751	camk4.L	22.8879	0.896482	21.9571	13.8921	33.6291	34.6871	32.2653	0.478747	0.200715	2.38521	0.0170694	0.0908331
chr6L:127281735-127288554	NM_001092702	otud6b.L	418.035	381.901	526.016	500.117	360.643	383.541	355.994	-0.316051	0.132507	-2.38517	0.0170712	0.0908331
chr3S:82305683-82325844	NM_001095952	MGC115291	57.0263	87.8552	86.8737	46.3071	38.2676	24.7765	58.0775	-0.500032	0.20965	-2.38507	0.0170757	0.0908331
chr9_10L:71509701-71525222	NM_001086324	ftcd.L	210.417	284.185	205.251	235.24	173.944	172.445	191.441	-0.364829	0.153028	-2.38406	0.0171226	0.0909467
chr7L:112452045-112457622	NM_001094121	LOC100497264.L	6.01092	20.6191	6.68259	4.63071	0	1.98212	2.15102	-0.367437	0.15413	-2.38395	0.017128	0.0909467
chr1L:145939256-145947163	NM_001096295	mmab.L	107.535	129.99	125.06	126.881	93.9296	95.1419	74.2101	-0.418667	0.175597	-2.38425	0.0171142	0.0909467
chr6L:62535297-62571611	NM_001089093	anln.L	922.665	1039.02	1050.12	921.511	851.165	850.331	823.84	-0.238579	0.10014	-2.38246	0.0171973	0.0912597
chr2L:45288921-45303284	NM_001090014	crk.L	690.708	819.385	730.312	716.834	613.442	637.252	627.022	-0.253213	0.106341	-2.38113	0.0172594	0.0915341
chr6S:127273528-127308482	NM_001086383	bop1.S	842.893	752.148	786.637	768.698	963.648	923.669	862.558	0.237994	0.0999757	2.38052	0.0172882	0.0916317
chr8L:77953995-78000186	NM_001090401	ppp2r5e1	278.086	318.251	309.309	312.11	238.883	270.56	219.404	-0.323082	0.135747	-2.38003	0.0173114	0.0916995
chr1S:178625842-178665042	NM_001096698	ube2r2.S	519.987	545.958	628.164	545.498	456.892	464.808	478.602	-0.272503	0.114508	-2.37977	0.0173236	0.0917087
chr3S:113547025-113571548	NM_001091539	hnrnph1.S	10678.9	10696.8	9241.07	9839.33	10958.5	11811.5	11526.2	0.195857	0.0823588	2.37809	0.0174023	0.0920704
chr7L:100434316-100462051	NM_001097925	myos.L	141.867	157.781	93.5563	91.688	171.624	190.284	146.269	0.430456	0.18108	2.37716	0.0174467	0.0922498
chr9_10L:45365156-45373196	NM_001096058	faim.L	88.979	119.232	97.375	106.506	57.9812	62.4369	90.3428	-0.448548	0.188729	-2.37667	0.0174696	0.0923155
chr9_10L:46800142-46808501	NM_001091181	iqcb1.L	290.397	372.04	298.807	311.184	251.639	239.837	268.877	-0.326112	0.137289	-2.37536	0.0175317	0.092422
chr9_10L:84578423-84583669	NM_001091239	hspe1.L	182.865	265.359	197.614	175.041	151.911	142.713	164.553	-0.389078	0.163782	-2.37558	0.0175214	0.092422
chr9_10L:244174-249774	NM_001092409	coq10b.L	432.653	380.108	395.228	387.127	453.413	476.7	503.338	0.277728	0.1169	2.37576	0.0175127	0.092422
chr4S:91794737-91806540	NM_001096188	hsd17b7.S	192.126	122.818	205.251	150.961	207.573	259.658	206.498	0.398753	0.167824	2.37602	0.0175004	0.092422
chr1L:75990642-76014462	NM_001086637	scarb2.L	157.751	177.503	209.07	163.927	113.643	144.695	137.665	-0.38721	0.163072	-2.37447	0.0175743	0.0925908
chr7L:71443630-71465539	NM_001096263	tbcel.L	54.5046	17.9296	40.0956	57.4208	62.6197	69.3743	79.5877	0.498293	0.21006	2.37214	0.0176852	0.0931196
chr8S:25441841-25453608	NM_001086688	ahsa1.S	1485.8	1215.63	1457.76	1412.37	1585.21	1614.44	1629.4	0.228294	0.0962863	2.37099	0.0177406	0.0933552
chr6L:107878262-107928660	NM_001086469	yes1.L	668.178	676.844	806.685	714.055	603.005	610.494	597.983	-0.258513	0.109083	-2.36987	0.0177942	0.0934601
chr5L:2046786-2051919	NM_001091385	prorsd1p.L	42.6965	69.0291	42.0049	55.5685	20.8732	26.7587	41.9449	-0.49901	0.21058	-2.36969	0.0178029	0.0934601
chr6L:63234832-63267134	NM_001092805	brd9.L	2488.82	2212.52	2168.02	2515.4	2726.28	2614.42	2696.3	0.210641	0.088869	2.37024	0.0177765	0.0934601
chr2L:154663941-154678965	NM_001095312	LOC496046	150.182	140.748	108.831	125.955	151.911	171.454	202.196	0.393387	0.165999	2.36982	0.0177968	0.0934601
chr9_10L:113678965-113693796	NM_001098700	rnf25.L	424.992	561.198	417.185	460.292	440.657	333.988	336.634	-0.328978	0.138873	-2.36891	0.0178404	0.0936011
chr6S:53561021-53565972	NM_001096688	irx1.S	575.337	612.297	372.316	508.452	706.212	557.968	694.779	0.339153	0.143292	2.36687	0.0179393	0.0940636
chr3S:89362908-89384822	NM_001091575	cep83.S	171.996	119.232	178.521	132.438	191.338	181.364	229.083	0.393339	0.166202	2.36663	0.0179507	0.0940679
chr1L:189177600-189761713	NM_001090892	cdk7.L	581.196	529.821	459.19	576.06	637.794	629.324	654.985	0.272381	0.115129	2.36588	0.0179872	0.094147
chr1L:10001649-10039609	NM_001091576	kdm3a.L	1973.36	1827.93	1862.53	1805.98	2134.87	2166.46	2042.39	0.198481	0.0838925	2.3659	0.0179862	0.094147
chr1S:65177697-65192893	NM_001086261	hpgds.S	918.155	1281.97	774.226	1072.47	712.01	970.249	698.005	-0.341345	0.144333	-2.36498	0.0180309	0.0942634
chr1S:27518567-27549660	NM_001094739	commd8.S	304.101	215.156	345.586	213.939	364.122	357.773	328.03	0.368824	0.155938	2.3652	0.0180204	0.0942634
chr6S:29531918-29538748	NM_001088696	agr2.S	321.206	208.88	110.74	320.445	412.826	454.897	419.449	0.501743	0.21218	2.3647	0.0180446	0.0942793
chr4S:120801078-120827347	NM_001086382	fam3d.S	505.556	358.593	369.452	577.913	518.352	629.324	579.699	0.347698	0.147124	2.36329	0.0181133	0.0944704
chr7L:56489892-56514966	NM_001086715	mapk8.L	953.99	1076.67	1094.04	942.812	872.038	891.955	846.426	-0.238785	0.101034	-2.36341	0.0181075	0.0944704
chr5L:143562197-143606176	NM_001246310	pum2.L	556.03	638.295	618.617	573.282	511.395	482.647	511.942	-0.261185	0.110505	-2.36357	0.0180999	0.0944704
chr2L:90245804-90259033	NM_001087905	tbx2.L	955.845	650.846	838.188	1040.06	1065.7	1135.76	1004.53	0.30673	0.129861	2.36199	0.0181771	0.0946348
chr2L:137731923-137797276	NM_001093446	spats2.L	378.598	441.966	388.545	435.287	339.77	362.728	303.294	-0.298777	0.126476	-2.36232	0.0181608	0.0946348
chr1L:152126700-152144307	NM_001246305	LOC100653492	43.6584	33.1698	15.2745	41.6764	73.0564	52.5263	46.2469	0.499421	0.21144	2.362	0.0181767	0.0946348
chr2L:56550581-56560862	NM_001093872	utp11.L	2382.67	2173.97	1978.05	2407.97	2700.77	2414.23	2621.02	0.224939	0.095244	2.36171	0.0181907	0.0946497
chr4S:19800556-19808596	NM_001086117	dhcr7.S	1914.63	1946.26	1631.51	1669.83	2275.18	1961.31	2003.67	0.234833	0.099458	2.36112	0.0182197	0.0947444
chr1L:88544254-88555016	NM_001093854	rpl36.L	942.581	805.937	678.761	1024.31	1099.32	979.169	1067.98	0.294821	0.124986	2.35883	0.0183325	0.095275
chr1L:141757068-141764784	NM_001086303	dnaja4.1.L	1014.88	891.103	1088.31	723.317	1172.38	1190.26	1023.88	0.29447	0.124903	2.35759	0.018394	0.0955382
chr5S:82397986-82414188	NM_001096045	fyttd1.S	1024.52	1060.54	1178.05	1091	911.465	943.49	962.581	-0.227377	0.0964944	-2.35638	0.0184542	0.0957943
chr6S:1380344-1386130	NM_001087985	LOC397846	2765.5	2659.86	2339.86	2668.21	3097.36	2996.97	2830.74	0.208834	0.0886503	2.3557	0.0184878	0.0959123
chr5L:26206490-26210543	NM_001095561	flrt3.L	907.098	994.199	953.702	1004.86	874.357	781.947	833.52	-0.232588	0.0987534	-2.35524	0.0185108	0.0959307
chr6L:1112815-1196117	NM_001100925	XFG	395.255	317.355	356.087	375.087	459.211	389.487	474.3	0.300965	0.127788	2.35519	0.0185131	0.0959307
chr8L:23942970-23955196	NM_001092484	zc4h2.L	852.264	709.117	798.093	823.34	942.775	920.696	919.56	0.240318	0.102068	2.35448	0.0185487	0.0960515
chr3S:7354393-7366651	NM_001095227	ikbip.S	59.4265	79.7869	68.7353	71.3129	44.0657	48.562	44.0959	-0.465443	0.1977	-2.35429	0.0185583	0.0960515
chr7S:9802392-9901364	NM_001095488	reep3.S	198.41	240.257	217.662	221.348	183.221	177.4	150.571	-0.351239	0.149297	-2.35262	0.0186417	0.0964265
chr1L:193341407-193362041	NM_001088921	elovl7.L	8463.15	8086.27	6916.49	8441.78	8894.32	8855.13	9584.94	0.211036	0.0897213	2.35213	0.0186663	0.0964972
chr6S:16232209-16294148	NM_001087321	arhgap12.S	156.902	181.089	191.886	169.484	132.197	125.865	140.892	-0.370378	0.157491	-2.35173	0.0186861	0.0965431
chr4S:66805766-66843554	NM_001094959	pomgnt1.S	159.941	171.228	223.39	163.001	146.113	126.856	129.061	-0.385911	0.164137	-2.35114	0.0187158	0.0966396
chr1S:133895878-133903756	NM_001087388	cdk2ap1.S	2184.69	2160.52	1814.8	2067.15	2314.61	2366.65	2384.4	0.214593	0.0912928	2.3506	0.0187431	0.0967242
chr6L:64279442-64301703	NM_001094862	pdia4.L	1341.15	1238.94	1169.45	1285.48	1472.72	1539.12	1341.16	0.224303	0.0954464	2.35004	0.0187715	0.096814
chr2S:44579881-44592925	NM_001093676	slc35a5.S	264.394	244.74	222.435	228.757	288.747	297.318	304.369	0.315351	0.134253	2.34893	0.0188277	0.0970468
chr5L:122742390-122785530	NM_001085992	epha4.L	403.975	479.618	483.056	388.98	344.409	382.55	345.238	-0.299791	0.127658	-2.3484	0.0188544	0.0971277
chr2S:43710965-43718349	NM_001086991	srsf3.S	19145	18679.1	17683.1	17479.1	19615.1	20886.6	20527.2	0.175033	0.0745575	2.34762	0.0188936	0.0972729
chr1L:112097202-112102636	NM_001095023	thap1.L	726.325	646.364	710.264	617.737	741	791.858	850.728	0.253335	0.107989	2.34595	0.0189789	0.0976548
chr4S:6660890-6699500	NM_001089603	ftmt.S	9310.67	8702.15	8368.52	8986.35	9700.26	9503.29	10603.4	0.186853	0.0796776	2.34511	0.0190216	0.0978176
chr6L:41295623-41314702	NM_001093353	hacl1.L	290.15	343.353	339.858	293.587	247	267.587	249.518	-0.313906	0.133902	-2.34429	0.0190632	0.0979742
chr3L:40442072-40444801	NM_001094626	higd2a.L	130.982	92.3377	136.516	93.5403	144.953	174.427	144.118	0.411168	0.175496	2.34289	0.0191352	0.0982868
chr8L:119811093-119820606	NM_001093180	rit1.L	280.099	259.98	214.798	257.467	338.61	329.032	280.708	0.326504	0.139399	2.34223	0.0191691	0.0984036
chr3L:3630822-3665159	NM_001086714	dnm1l.L	885.868	1091.92	883.057	932.625	780.427	846.366	780.82	-0.253142	0.10812	-2.3413	0.0192165	0.0985894
chr4L:70721103-70730943	NM_001094384	tyw3.L	284.544	285.978	364.679	311.184	237.723	251.73	255.971	-0.322602	0.13789	-2.33955	0.0193069	0.0989954
chr3S:87225265-87236053	NM_001089937	yeats4.S	324.148	298.529	274.941	273.212	342.089	315.158	440.959	0.327842	0.14021	2.33822	0.0193759	0.0992916
chr8S:42334594-42391147	NM_001095795	MGC85120	110.697	118.336	152.745	122.251	103.207	77.3028	90.3428	-0.416631	0.178218	-2.33776	0.0193997	0.0993071
chr6L:98559358-98617493	NM_001172466	tshz1.L	45.5457	36.7558	29.5943	33.3411	48.7042	74.3296	50.5489	0.484907	0.207427	2.33773	0.0194015	0.0993071
chr6L:28165586-28178673	NM_001086193	dus3l.L	2937.87	2753.1	2398.1	2963.65	3258.55	3171.4	3082.41	0.217489	0.0930511	2.3373	0.0194234	0.0993492
chr6L:20831389-20838637	NM_001087664	bambi.L	2841.23	2250.17	2379.96	3080.35	3111.27	2895.88	3329.78	0.256212	0.109637	2.33692	0.0194435	0.0993492
chr1L:126813057-126815258	NM_001096256	dmrt2.L	33.071	26.8945	24.8211	16.6706	42.9061	37.6603	49.4734	0.494522	0.211594	2.33713	0.0194325	0.0993492
chr4L:132045233-132088965	NM_001091047	qrich1.L	663.275	507.409	544.154	716.834	758.395	708.609	744.252	0.291464	0.124762	2.33616	0.019483	0.0994354
chr5S:12413907-12485216	NM_001092972	enah.S	874.959	932.341	911.697	1007.64	836.089	803.751	758.234	-0.235227	0.100684	-2.33627	0.019477	0.0994354
chr2L:173770133-173790551	NM_001091086	tpp1.L	581.362	696.567	619.572	601.066	518.352	558.959	493.659	-0.264842	0.113395	-2.33556	0.0195139	0.0994781
chr2S:44983620-45070354	NM_001093305	kdm6a.S	355.186	297.632	335.084	315.814	388.474	399.398	394.712	0.28889	0.12369	2.33559	0.0195126	0.0994781
chr3L:25920044-25948693	NM_001095839	spdl1.L	75.3205	115.646	98.3296	64.8299	61.4601	65.41	46.2469	-0.463743	0.198598	-2.33509	0.019539	0.0995481
chr8L:1045644-1049848	NM_001095221	LOC495954	403.494	363.972	338.903	379.718	444.136	436.067	458.167	0.279065	0.11956	2.33411	0.01959	0.0997503
chr8S:15805361-15832204	NM_001256285	mis18bp1b	122.46	152.402	151.79	126.881	106.685	86.2223	110.777	-0.401836	0.172221	-2.33326	0.0196344	0.099919
chr8L:119634198-119637102	NM_001096644	fdps.L	273.983	93.2341	185.203	250.058	287.587	332.006	495.81	0.49324	0.211536	2.3317	0.0197163	0.100277
chr8L:7924073-8005968	NM_001094302	med27.L	818.355	684.016	800.002	745.544	924.221	933.58	822.765	0.24816	0.106514	2.32985	0.0198141	0.100717
chr1L:95703487-95727516	NM_001085955	cwf19l1.L	1363.78	1526.71	1393.8	1498.5	1253.55	1175.4	1334.71	-0.219867	0.0944203	-2.3286	0.0198801	0.100994
chr6L:110955595-111109164	NM_001172236	cdh2.L	292.351	272.531	234.845	252.837	398.911	300.292	294.69	0.33384	0.143398	2.32807	0.0199082	0.101079
chr2S:8168478-8171698	NM_001092621	hist1h2aa.L	15.0016	17.9296	39.1409	10.1876	10.4366	6.93743	5.37755	-0.454577	0.195288	-2.32773	0.0199267	0.101114
chr6L:86215375-86234584	NM_001094165	rpp40.L	308.303	349.628	413.366	284.326	270.193	278.488	253.82	-0.333215	0.14321	-2.32676	0.019978	0.101316
chr6L:72165714-72210075	NM_001093457	chmp5.L	83.0758	98.613	110.74	90.7619	55.662	67.3922	75.2856	-0.436112	0.187595	-2.32475	0.0200854	0.101802
chr2L:111455589-111461725	NM_001093873	lipt1.L	39.3428	18.8261	45.8235	12.966	64.939	38.6514	54.851	0.492827	0.21205	2.32411	0.0201196	0.101917
chr4S:23663638-23724735	NM_001088748	nfatc3.S	202.768	225.913	219.571	248.206	198.296	153.615	171.006	-0.349664	0.15052	-2.32303	0.0201773	0.102151
chr9_10L:65105348-65108379	NM_001096636	sp5.L	1417.97	1369.82	1280.19	1272.52	1436.78	1547.05	1601.43	0.214186	0.0922222	2.3225	0.0202062	0.102238
chr3L:16226522-16237759	NM_001098430	pitx1	148.281	73.5115	42.9595	152.813	221.488	203.168	195.743	0.483922	0.20849	2.32109	0.0202822	0.102505
chr1L:168903047-168966511	NM_001122599	slc12a2.L	789.279	741.391	753.224	665.896	846.526	880.062	848.577	0.237786	0.102446	2.32109	0.0202822	0.102505
chr1S:62347467-62456063	NM_001087344	ppp3ca.S	269.724	322.734	321.719	269.507	265.554	226.953	211.875	-0.328907	0.141735	-2.32057	0.02031	0.102527
chr9_10L:33619135-33640168	NM_001093481	rbm39.L	4161.1	4050.31	3603.83	3967.59	4545.73	4312.11	4487.02	0.191451	0.0824994	2.32064	0.0203063	0.102527
chr4L:130554388-130585188	NM_001090106	copg1.L	647.327	584.506	578.522	602.918	677.221	749.242	691.552	0.245381	0.105796	2.31937	0.020375	0.102797
chr8L:119259633-119275058	NM_001087178	thbs3.L	34.4495	17.0332	21.9571	28.7104	70.7371	44.5978	23.6612	0.491603	0.211995	2.31893	0.0203987	0.102858
chr9_10S:41855365-41906143	NM_001088425	gli2.S	374.331	381.901	212.888	362.121	404.709	450.933	433.43	0.360646	0.155596	2.31784	0.0204578	0.103097
chr3L:40829229-40847954	NM_001088449	cdc25c.L	1867.39	1996.47	1975.18	2032.88	1799.74	1750.21	1649.83	-0.198853	0.0858011	-2.31761	0.0204707	0.103103
chr9_10L:52962875-52972330	NM_001096840	catip.L	20.5319	12.5507	8.59191	16.6706	32.4695	22.7944	30.1143	0.48532	0.2095	2.31656	0.0205276	0.10333
chr1S:115323009-115324900	NM_001096578	mrpl52.S	138.97	67.2362	168.02	92.6142	153.07	175.418	177.459	0.446011	0.192561	2.31621	0.020547	0.103369
chr4L:42581804-42589463	NM_001094199	gcsh.L	197.29	314.665	222.435	161.149	150.751	186.32	148.42	-0.407701	0.176092	-2.31527	0.0205981	0.103567
chr5S:41794306-41804505	NM_001087335	pdcd2.S	153.294	134.472	116.468	137.069	189.019	155.597	187.139	0.373221	0.161291	2.31397	0.0206696	0.103818
chr7L:66424333-66477497	NM_001163392	kcnj5.L	22.7677	36.7558	43.9142	14.8183	16.2347	10.9017	13.9816	-0.481796	0.208216	-2.31393	0.0206718	0.103818
chr9_10S:1074234-1078637	NM_001085987	MGC53311	6626.38	4743.29	2749.41	6827.52	8093.02	8478.53	8866.5	0.483664	0.209118	2.31288	0.0207295	0.104049
chr8S:47299863-47318772	NM_001091848	cradd.2.S	24.9836	40.3417	26.7304	34.2672	16.2347	11.8927	20.4347	-0.48954	0.211683	-2.31261	0.0207439	0.104058
chr9_10L:66877950-66886631	NM_001092400	chrna1.2.L	53.2401	36.7558	43.9142	40.7502	68.4179	69.3743	60.2285	0.465107	0.201138	2.31238	0.0207567	0.104058
chr5L:121745411-121779940	NM_001093520	serpine2.L	543.411	617.676	643.438	540.867	433.7	532.2	492.583	-0.277165	0.119871	-2.3122	0.0207668	0.104058
chr8L:49755654-49762969	NM_001122876	mypop.L	163.343	119.232	158.473	137.995	179.742	194.248	190.365	0.367811	0.159099	2.31184	0.0207865	0.104098
chr5S:89744570-89769507	NM_001094981	mfn1.S	114.786	141.644	136.516	125.029	95.0892	100.097	90.3428	-0.39552	0.171104	-2.31158	0.020801	0.104112
chr1S:175048027-175060465	NM_001086978	atp5f1a.S	1699.71	1644.15	1491.17	1570.74	1735.96	1962.3	1793.95	0.21216	0.0918173	2.31068	0.0208507	0.104129
chr2L:7659529-7664428	NM_001088841	LOC398398	32.3984	55.5819	51.5514	23.1535	17.3944	19.8212	26.8877	-0.490027	0.212081	-2.31056	0.020857	0.104129
chr1L:49689166-49691852	NM_001090271	mab21l2.L	28.6611	31.3769	66.8259	21.3013	22.0329	8.91955	21.5102	-0.482677	0.208898	-2.31059	0.0208557	0.104129
chr4S:92719971-92732808	NM_001090819	krr1.S	4721.32	4428.62	4312.18	4505.68	4876.22	4951.34	5253.86	0.180593	0.0781456	2.31098	0.0208339	0.104129
chr4L:8266523-8312810	NM_001092905	pacsin3.L	54.7471	74.408	76.3725	54.6424	35.9484	50.5441	36.5673	-0.470162	0.203494	-2.31044	0.0208637	0.104129
chr5L:138035003-138044747	NM_001091920	rrm2.1.L	4828.38	5593.15	4662.54	5293.83	4345.11	4474.64	4601.03	-0.202909	0.0878406	-2.30996	0.0208902	0.104163
chr3S:97613864-97619028	NM_001094622	tmed9.S	1702.67	1637.87	1475.9	1615.19	1835.69	1791.84	1859.56	0.20451	0.0885363	2.30989	0.020894	0.104163
chr2L:82478818-82518236	NM_001087044	gnl2.L	3019.99	2730.68	2476.38	3088.68	3600.64	3109.95	3113.6	0.229489	0.0993735	2.30936	0.0209237	0.104203
chr7L:110369705-110378824	NM_001087159	grwd1.L	1048.13	1226.39	1028.16	1159.53	963.648	986.106	924.938	-0.233266	0.101011	-2.3093	0.0209269	0.104203
chr7L:57326380-57345802	NM_001171778	cxcl12.L	817.437	692.084	614.799	882.613	861.601	903.848	949.675	0.282117	0.122176	2.30911	0.0209375	0.104203
chr8L:78871859-78881556	NM_001096340	trmt5.L	599.716	725.254	606.207	645.521	511.395	530.218	579.699	-0.263754	0.114239	-2.3088	0.0209549	0.10423
chr4S:99752313-99761781	NM_001092509	rassf1.S	429.7	358.593	378.044	418.616	463.85	482.647	476.451	0.27511	0.119185	2.30826	0.0209844	0.104282
chr1S:125936254-125941818	NM_001096905	gucd1.S	313.405	311.976	435.323	325.076	267.873	223.98	316.2	-0.348079	0.150802	-2.30818	0.0209891	0.104282
chr2S:61741670-61760706	NM_001093320	vezf1.S	1835.21	1742.76	1619.1	1746.7	2020.07	1930.59	1952.05	0.199195	0.0863151	2.30777	0.021012	0.104337
chr9_10L:4783521-4791917	NM_001097046	dlx3.L	911.032	753.941	647.257	1014.13	932.338	1037.64	1080.89	0.301403	0.130619	2.3075	0.0210271	0.104354
chr1L:48576189-48668965	NM_001095717	fbxw7.L	168.131	191.847	184.249	200.973	150.751	135.775	145.194	-0.354542	0.153785	-2.30543	0.0211424	0.104867
chr4L:128632789-128854092	NM_001087913	plxna1.L	1334.12	1597.53	1391.89	1357.72	1156.15	1328.02	1173.38	-0.233681	0.101407	-2.30439	0.0212009	0.105098
chr1L:12268617-12282929	NM_001088357	slbp.L	6671.61	6078.15	6696.91	5911.56	7056.32	7160.42	7126.32	0.184707	0.0801939	2.30326	0.0212642	0.105352
chr1L:163377111-163405109	NM_001094749	LOC495046	5639.7	5213.04	5125.55	5500.36	5854.95	6176.29	5968	0.178175	0.0773763	2.30271	0.0212953	0.105447
chr3S:45416568-45424200	NM_001096521	mfap1.S	290.232	397.142	279.714	308.405	260.916	246.774	248.443	-0.332028	0.144209	-2.30241	0.0213122	0.105471
chr5S:87369308-87454193	NM_001093082	xxylt1.S	202.136	226.81	284.488	190.785	166.986	143.704	200.045	-0.376198	0.163493	-2.301	0.0213918	0.105761
chr5L:105328639-105352020	NM_001096320	zmat3.L	13.8433	21.5156	16.2292	23.1535	6.95775	10.9017	4.30204	-0.458803	0.199397	-2.30095	0.0213946	0.105761
chr6L:99236263-99254223	NM_001093621	cndp2.L	554.395	610.504	620.527	593.657	469.648	548.057	483.979	-0.25862	0.112423	-2.30042	0.0214246	0.105849
chr8L:71223215-71227732	NM_001088032	bmp4.L	1201.49	1147.5	1006.21	1156.75	1250.08	1319.1	1329.33	0.22288	0.0969029	2.30004	0.0214462	0.105864
chr1L:177324519-177342257	NM_001094886	nudt12.L	56.2015	66.3397	80.1911	62.9776	33.6291	44.5978	49.4734	-0.464029	0.201757	-2.29994	0.0214516	0.105864
chr8L:116039637-116044219	NM_001091138	pmf1.L	506.943	680.43	455.371	569.577	432.54	488.593	415.147	-0.311328	0.135394	-2.29941	0.0214814	0.105918
chr3S:15342466-15388848	NM_001095634	tcof1.S	3899.63	3429.94	3533.18	3872.2	4205.96	3877.03	4479.5	0.20355	0.0885262	2.29932	0.0214867	0.105918
chr2S:56803018-56812176	NM_001086184	sypl2.S	11.8779	5.37889	7.63725	5.55685	18.554	15.857	18.2837	0.451677	0.196477	2.29888	0.021512	0.105945
chr2L:41867406-41875638	NM_001095737	supt4h1.L	453.743	350.524	486.875	354.712	438.338	551.03	540.981	0.318179	0.138411	2.2988	0.021516	0.105945
chr1S:41724674-41737089	NM_001094385	ppid.S	3001.75	2827.5	2702.63	2876.6	3236.51	3253.65	3113.6	0.184861	0.0804263	2.29851	0.0215327	0.105967
chr9_10S:54636125-54703940	NM_001092540	gpd2.S	47.8113	75.3045	51.5514	53.7162	38.2676	34.6871	33.3408	-0.47342	0.206026	-2.29786	0.0215697	0.10609
chr4S:64770941-64800582	NM_001087969	ptch2.S	207.22	178.4	187.113	171.336	262.075	212.087	232.31	0.338961	0.147593	2.29659	0.021642	0.106364
chr9_10L:4321611-4334500	NM_001092407	znf652.L	885.337	804.144	762.77	865.943	955.531	977.186	946.448	0.228787	0.0996257	2.29646	0.0216494	0.106364
chr2L:126442722-126518587	NM_001092551	tbc1d4.L	318.722	364.868	332.22	378.792	293.385	227.944	315.124	-0.320172	0.139452	-2.29593	0.0216797	0.106372
chr7L:20514658-20564742	NM_001092666	march5.L	51.3104	75.3045	63.962	52.7901	39.4272	37.6603	38.7183	-0.467256	0.203545	-2.29559	0.0216994	0.106372
chr4S:58901098-58962944	NM_001093393	jak1.L	102.96	96.8201	147.972	123.177	77.6949	88.2045	83.8897	-0.419358	0.182664	-2.29579	0.0216878	0.106372
chr9_10S:97532392-97565038	NM_001095333	tekt4.S	70.7925	53.7889	49.6421	63.9038	91.6104	86.2223	79.5877	0.441272	0.192222	2.29564	0.0216963	0.106372
chr6S:105162709-105185617	NM_001095659	fam921.S	268.475	312.872	267.304	331.559	213.371	269.569	216.177	-0.330685	0.144088	-2.29502	0.0217322	0.106473
chr1L:65144468-65176326	NM_001096616	papss1.L	859.906	876.759	936.518	990.046	788.545	826.545	741.026	-0.234797	0.102348	-2.29409	0.0217851	0.106673
chr3S:57252253-57276363	NM_001088395	rbpms2.S	298.128	309.286	382.817	315.814	227.286	281.461	272.104	-0.320691	0.13981	-2.29376	0.0218041	0.106707
chr1S:56517700-56543215	NM_001085952	cfi.S	174.314	159.574	119.332	159.296	214.531	232.899	160.251	0.381729	0.166597	2.29133	0.0219446	0.107275
chr3S:36188416-36203265	NM_001094296	rab11a.S	563.607	424.933	414.321	635.333	598.366	595.628	713.063	0.323847	0.141336	2.29133	0.0219446	0.107275
chr1L:173816704-173845564	NM_001091117	trim36.L	222.124	181.089	214.798	182.45	252.798	234.882	266.726	0.331764	0.144899	2.28962	0.0220435	0.107699
chr1L:152984840-152995124	NM_001086342	mmp11.L	6.25946	0.896482	2.86397	2.77843	10.4366	10.9017	9.67958	0.380543	0.166246	2.28903	0.0220775	0.107793
chr1L:95615210-95622092	NM_001091863	arrdc2.L	65.1139	75.3045	82.1004	81.5005	54.5024	57.4816	39.7938	-0.449522	0.196395	-2.28886	0.0220872	0.107793
chr4S:87738102-87809924	NM_001112875	rbfox2.L	393.303	376.522	348.45	326.002	466.169	397.416	445.261	0.285127	0.124741	2.28575	0.0222686	0.108558
chr4S:105957465-105986120	NM_001353386	txnrd3.S	920.76	979.855	1071.12	965.04	867.399	909.794	731.346	-0.246925	0.10802	-2.28591	0.0222594	0.108558
chr9_10S:17055667-17069915	NM_001090655	csnk2a1.S	4320.02	4114.85	3713.61	4240.8	4723.15	4495.45	4632.22	0.190507	0.0833788	2.28484	0.0223224	0.108677
chr1S:106982240-107195416	NM_001092999	pcsk5.S	69.5277	106.681	67.7806	81.5005	55.662	61.4458	44.0959	-0.452476	0.198045	-2.28471	0.02233	0.108677
chr8L:72362821-72374884	NM_001127774	tmx1.L	192.577	199.019	272.077	195.416	154.23	148.659	186.063	-0.368301	0.161193	-2.28484	0.0223221	0.108677
chr6L:104367435-104402287	NM_001091984	acss2.2.L	35.9427	21.5156	28.6397	26.8581	47.5446	41.6246	49.4734	0.480119	0.210196	2.28415	0.0223628	0.108776
chr3L:16025521-16043039	NM_001091580	c5orf24.L	94.695	121.025	112.649	105.58	59.1409	90.1866	79.5877	-0.420837	0.18433	-2.28307	0.0224265	0.109026
chr1S:100808692-100835430	NM_001089065	psip1.S	48.8646	37.6522	31.5037	39.8241	69.5775	68.3832	46.2469	0.469642	0.205747	2.28262	0.0224526	0.109092
chr1L:67160371-67171649	NM_001089751	cisd2.L	78.7552	93.2341	84.0098	108.359	66.0986	71.3564	49.4734	-0.436626	0.191408	-2.28113	0.022541	0.109341
chr3S:54493394-54508345	NM_001093563	MGC80849	138.623	94.1306	147.017	103.728	164.667	169.471	152.722	0.394298	0.172843	2.28125	0.0225335	0.109341
chr1L:18323725-18326542	NM_001105270	msx1.L	2584.4	2203.55	2155.61	2742.31	2843.4	2687.76	2873.76	0.2286	0.100209	2.28124	0.0225345	0.109341
chr6L:92136649-92158185	NM_001174000	dek.L	3918.1	3354.64	3640.1	3841.64	4123.63	3857.21	4691.37	0.214073	0.0939553	2.27846	0.0226991	0.110048
chr2L:54986500-55030156	NM_001114840	sh3d21.L	162.085	127.3	152.745	135.217	178.582	188.302	190.365	0.356423	0.156446	2.27825	0.0227116	0.110048
chr9_10S:56753716-56768241	NM_001090024	gca.S	1637.78	1757.1	1942.73	1603.15	1502.87	1505.42	1515.39	-0.216983	0.0952706	-2.27755	0.0227536	0.11013
chr3L:87094164-87141231	NM_001091102	mtmr10.L	65.3414	69.9256	99.2843	72.2391	40.5869	59.4637	50.5489	-0.45355	0.199133	-2.27762	0.0227492	0.11013
chr4L:63262845-63273084	NM_001091969	siah1.L	1207.78	1333.07	921.243	978.006	1194.41	1451.9	1368.05	0.283042	0.12429	2.27727	0.0227699	0.110148
chr2S:28931089-28938952	NM_001093391	poglut1.L	293.815	319.148	336.039	328.78	282.948	237.855	258.122	-0.301537	0.132459	-2.27645	0.0228193	0.110327
chr7L:33734156-33745144	NM_001094504	hnrnph3.L	15692.9	14595.6	14802.9	14964.6	16375.1	16801.5	16617.7	0.161816	0.0711245	2.27511	0.0228991	0.110592
chr8L:98662964-98694090	NM_001095573	max.S	2276.49	2114.8	1940.82	2244.97	2343.6	2351.79	2662.96	0.21241	0.0933623	2.27511	0.0228993	0.110592
chr9_10S:41769842-41794335	NM_001086528	tfcp2l1.S	690.973	595.264	638.665	655.708	735.202	729.421	791.575	0.239093	0.10513	2.27427	0.0229498	0.110775
chr8S:14199676-14213245	NM_001097000	psmc6.S	1049.96	971.787	948.928	980.784	1137.59	1187.29	1073.36	0.216074	0.0950604	2.27302	0.0230251	0.111078
chr2L:120726607-120738244	NM_001197278	LOC100505442	135.566	207.087	152.745	122.251	91.6104	127.847	111.853	-0.410676	0.180691	-2.27281	0.0230377	0.111078
chr7L:56264858-56269468	NM_001089164	gdf10.L	47.3558	34.0663	36.2769	36.1195	63.7794	64.419	49.4734	0.465265	0.204817	2.27161	0.0231103	0.111367
chr3S:41443704-41510831	NM_001091192	akap13.S	40.7474	69.0291	41.0502	47.2332	22.0329	30.7229	34.4163	-0.477718	0.210366	-2.27089	0.0231536	0.111396
chr8S:31280181-31296612	NM_001094511	rab14.S	979.749	1068.61	1142.72	978.932	855.803	949.437	882.993	-0.231252	0.101824	-2.2711	0.0231407	0.111396
chr1L:103976787-103998112	NM_001094877	fkbp8.L	128.537	156.884	142.244	155.592	103.207	134.784	78.5122	-0.402694	0.17733	-2.27088	0.0231543	0.111396
chr4L:113635982-113638777	NM_001089743	atf4.L	3264.87	3241.68	2498.34	3222.05	3572.8	3394.39	3659.96	0.230648	0.101605	2.27006	0.0232042	0.111482
chr3L:41662674-41670403	NM_001092343	arl1.L	1595.45	1486.37	1276.38	1611.49	1613.04	1745.26	1840.2	0.233498	0.102865	2.26996	0.0232102	0.111482
chr5S:122712426-122712948	NM_001142639	msgn1.S	616.189	523.546	506.923	618.663	754.916	576.798	716.289	0.281866	0.124163	2.27013	0.0231995	0.111482
chr2L:152396359-152400324	NM_001097953	dleu7.L	429.115	417.761	585.204	449.179	381.517	429.13	311.898	-0.322503	0.142114	-2.26932	0.0232489	0.111607
chr6S:6718156-6767496	NM_001090817	ctdspl.S	779.045	813.109	922.198	805.743	716.648	692.752	723.818	-0.236112	0.10415	-2.26704	0.0233878	0.112152
chr3S:61653950-61662154	NM_001094569	gcc1.S	614.153	546.854	586.159	539.941	712.01	672.931	627.022	0.247134	0.109003	2.26722	0.0233768	0.112152
chr5S:88107540-88170652	NM_001093420	atp13a4.S	20.3958	18.8261	46.7782	20.3751	11.5962	11.8927	12.9061	-0.468543	0.206781	-2.26589	0.0234579	0.112427
chr3S:4490657-4501494	NM_001089929	akr1b1.S	2355.87	2665.24	2284.49	2641.36	2163.86	2224.93	2155.32	-0.204022	0.0901147	-2.26402	0.0235726	0.112915
chr5S:5001491-5056218	NM_001095785	tasp1.S	105.044	136.265	131.743	106.506	95.0892	96.1329	64.5306	-0.414044	0.182988	-2.26268	0.0236555	0.113128
chr3L:134589434-134594212	NM_001096808	rnasek.L	997.405	547.751	950.838	765.919	1577.09	903.848	1238.99	0.460006	0.203298	2.26272	0.0236532	0.113128
chr2S:58224484-58273389	NM_001105264	dcaf6.S	161.204	198.123	181.385	175.041	147.272	141.722	123.684	-0.35645	0.157522	-2.26286	0.0236442	0.113128
chr7L:109055274-109070946	NM_001088134	snrnp70.L	21147.4	20038.2	18621.5	20675.2	21614.2	22059	23876.3	0.180214	0.0797019	2.2611	0.023753	0.113471
chr5L:52868315-52898622	NM_001134783	tmem181.L	272.526	227.706	231.027	262.098	295.704	313.175	305.445	0.304526	0.134669	2.26129	0.0237414	0.113471
chr9_10L:108495639-108527336	NM_001094683	fam83g.L	37.6048	48.41	61.098	36.1195	30.1502	20.8123	29.0387	-0.476955	0.210967	-2.26081	0.0237713	0.113497
chr6S:63831994-63843695	NM_001090515	ssr1.S	5128.5	4624.05	4589.03	5128.05	5758.7	5377.5	5293.66	0.188198	0.0832686	2.26013	0.0238134	0.113636
chr9_10L:66888164-66896823	NM_001086132	chrna1.L	55.5588	44.8241	43.9142	37.9718	83.493	69.3743	53.7755	0.457172	0.202311	2.25975	0.023837	0.113687
chr7S:78083740-78094734	NM_001090324	prmt1.S	49966.6	48502.4	43499.9	48573.4	52866.1	53952.4	52405.3	0.173604	0.0768605	2.25869	0.0239029	0.113878
chr4S:52284329-52288759	NM_001091901	gng5.S	2534.83	2301.27	2248.22	2487.62	2476.96	2851.28	2843.65	0.205543	0.0910008	2.2587	0.0239023	0.113878
chr3L:14352707-14360469	NM_001096946	zp4.L	489.094	567.473	600.479	460.292	403.549	474.718	428.053	-0.285465	0.126455	-2.25745	0.0239802	0.114185
chr2S:79105882-79124149	NM_001097704	rflnb.S	7.00077	0.896482	0	5.55685	9.277	19.8212	6.45306	0.356624	0.158005	2.25705	0.024005	0.114241
chr1L:163176483-163195512	NM_001088598	p2rx4.L	144.155	149.713	229.118	133.364	98.5681	134.784	119.382	-0.407345	0.180655	-2.25482	0.0241445	0.114843
chr1L:68645277-68660248	NM_001095743	eif4e.L	1635.48	1517.74	1387.12	1626.31	1812.49	1708.59	1760.61	0.209639	0.0929933	2.25435	0.0241743	0.114922
chr7S:79247288-79321953	NM_001094370	tead4.S	1166.45	1021.99	996.661	1165.09	1407.78	1285.41	1121.76	0.242588	0.107629	2.25393	0.0242006	0.114923
chr4S:2354761-2369628	NM_001096413	MGC131138	161.87	189.158	224.344	151.887	112.484	154.606	138.741	-0.381068	0.16906	-2.25404	0.0241937	0.114923
chr3L:25579022-25581232	NM_001086898	foxi1.L	416.697	188.261	269.213	444.548	487.042	554.003	557.114	0.472836	0.209835	2.25337	0.024236	0.115029
chr4S:1241356-1250571	NM_001086016	cfl1.S	2542.09	3560.83	2404.78	2445.94	2338.96	2171.42	2330.63	-0.271922	0.120723	-2.25244	0.0242947	0.115189
chr8S:73850746-73855720	NM_001087011	rap2c.S	111.83	135.369	120.287	136.143	97.4085	88.2045	93.5693	-0.388101	0.172327	-2.25212	0.0243148	0.115189
chr8L:69437355-69445200	NM_001091586	lrr1.L	231.508	298.529	246.301	240.797	213.371	206.141	183.912	-0.329057	0.146117	-2.252	0.024322	0.115189
chr8S:85137727-85138827	NM_001246234	sft2d3.S	371.125	259.98	404.774	302.848	451.094	374.621	433.43	0.328118	0.145698	2.25205	0.024319	0.115189
chr8S:26292288-26301957	NM_001090207	araf.S	235.845	259.083	285.442	257.467	243.521	194.248	175.308	-0.33387	0.148288	-2.25151	0.0243535	0.115277
chr7L:93845121-93856609	NM_001092092	phf13.L	356.589	356.8	516.469	343.599	349.047	260.649	312.973	-0.34047	0.151236	-2.25125	0.0243694	0.11529
chr4L:24749116-24859844	NM_001087700	plcb3.L	182.335	215.156	217.662	200.973	199.455	145.686	115.079	-0.375574	0.166852	-2.25095	0.024389	0.115321
chr1L:154962202-154987723	NM_001086246	MGC53924	86.8589	51.0995	88.783	66.6822	100.887	92.1687	121.533	0.432519	0.192228	2.25003	0.0244473	0.115534
chr6L:41121616-41136286	NM_001092871	fkbp14.L	1249.81	1451.4	1310.74	1290.12	1064.54	1214.05	1168	-0.219997	0.0978122	-2.24918	0.0245009	0.115667
chr2S:6322364-6331164	NM_001095086	timm22.S	784.94	964.615	746.541	867.795	689.977	750.233	690.477	-0.254243	0.113049	-2.24897	0.0245146	0.115667
chr9_10L:31128114-31133619	NM_001096353	snrpb.L	9858.24	9481.19	8938.45	9329.03	10172.2	10234.7	10993.9	0.172348	0.0766288	2.24913	0.0245044	0.115667
chr3S:61390777-61406136	NM_001092848	MGC84778	67.5703	46.6171	52.5061	60.1992	82.3334	72.3475	91.4183	0.437645	0.194644	2.24844	0.0245479	0.115707
chr2L:110434556-110459581	NM_001094858	sept10.L	1114.4	986.13	1090.22	1009.49	1189.78	1205.13	1205.65	0.211286	0.093971	2.24842	0.0245496	0.115707
chr1S:79875040-79889865	NM_001091320	paqr3.S	27.0464	45.7206	32.4583	30.5627	26.6714	12.8838	13.9816	-0.475897	0.211716	-2.24781	0.0245883	0.115828
chr4L:60118071-60128109	NM_001087976	ccne1.L	3406.65	3891.63	3642.01	3483.22	2981.4	2897.86	3543.8	-0.213583	0.0950479	-2.24711	0.024633	0.115977
chr5S:17679914-17687551	NM_001089958	slc30a1.S	1717.36	1524.02	1722.2	1502.2	1864.68	1970.23	1720.81	0.214694	0.0955551	2.24681	0.0246523	0.116005
chr4L:127309880-127318229	NM_001091201	chchd4.L	256.419	249.222	230.072	191.711	311.939	270.56	285.01	0.321042	0.142929	2.24616	0.0246937	0.116138
chr2L:75317907-75387081	NM_001086823	tspan7.L	147.027	70.8221	126.015	75.9436	202.934	102.079	304.369	0.468395	0.208618	2.24523	0.0247535	0.116357
chr1L:215402633-215423498	NM_001094477	aqp3.L	14.1045	4.48241	14.3198	2.77843	30.1502	17.8391	15.0571	0.432573	0.192711	2.24468	0.0247889	0.116461
chr1L:159404777-159419299	NM_001093999	slc15a4.L	183.378	222.328	214.798	188.933	151.911	155.597	166.704	-0.340376	0.151658	-2.24437	0.0248088	0.116493
chr3S:18877486-18894230	NM_001086154	ddx39a.S	17146.9	16881.7	14286.4	16748.3	17866.3	18707.3	18391.2	0.189765	0.0846364	2.24212	0.0249539	0.117035
chr2S:150583942-150592202	NM_001090453	fzd4.S	87.9741	111.164	88.783	114.842	66.0986	80.276	66.6816	-0.41631	0.185662	-2.2423	0.0249422	0.117035
chr5S:98064258-98066521	NM_001091032	rap2b.S	2855.22	2909.98	3107.41	3122.02	2654.38	2564.87	2772.66	-0.185901	0.0829192	-2.24196	0.0249641	0.117035
chr4L:117112188-117115285	NM_001093510	MGC75753.L	2870.43	2554.97	2235.81	2988.66	3107.79	2706.59	3628.77	0.257193	0.114776	2.24082	0.0250379	0.117282
chr1S:152159520-152163322	NM_001171760	cox7c.S	681.97	563.887	564.202	714.055	769.991	696.716	782.971	0.263715	0.117692	2.24073	0.0250434	0.117282
chr7S:193190-197076	NM_001098681	zyx.S	2864.32	2632.07	2434.37	2874.74	3271.3	2852.27	3121.13	0.207928	0.0928034	2.24052	0.025057	0.117283
chr5L:37856168-37879518	NM_001092936	sec23b.L	2574	2298.58	2171.84	2653.4	2642.78	2767.04	2910.33	0.212208	0.0948002	2.23847	0.0251902	0.117844
chr6L:126733878-126772676	NM_001090951	nbn.L	314.938	332.595	359.905	356.565	271.352	274.524	294.69	-0.286898	0.128197	-2.23795	0.0252242	0.11794
chr2S:137995753-138036614	NM_001086387	flt1.S	6.98677	12.5507	15.2745	6.48299	2.31925	0.991061	4.30204	-0.376305	0.168264	-2.2364	0.0253257	0.118353
chr2S:51659859-51678102	NM_001087259	rps10	1252.59	1165.43	941.291	1300.3	1376.47	1322.08	1409.99	0.249586	0.111664	2.23516	0.025407	0.118655
chr9_10L:97624455-97642460	NM_001091326	get4.S	1447.44	1221.91	1489.26	1277.15	1493.6	1579.75	1622.94	0.222386	0.0995108	2.23479	0.0254309	0.118655
chr3L:84622362-84634845	NM_001091909	trip4.L	442.473	511.891	483.056	471.406	398.911	440.031	349.54	-0.274531	0.122836	-2.23494	0.025421	0.118655
chr4L:85789519-85939421	NM_001091736	faf1.L	351.578	401.624	412.412	355.638	336.291	301.283	302.218	-0.284807	0.127487	-2.23401	0.0254826	0.118833
chr1S:87922014-87929947	NM_001094546	LOC100495756.S	186.047	194.537	230.072	210.234	175.103	153.615	152.722	-0.339419	0.151975	-2.23338	0.0255238	0.118963
chr5S:103319086-103332317	NM_001095404	commd2.S	21.2839	35.8593	29.5943	22.2274	9.277	17.8391	12.9061	-0.468071	0.209715	-2.23194	0.0256189	0.119343
chr5L:112211354-112232680	NM_001089741	rarres1.L	288.002	210.673	266.349	281.547	329.333	326.059	314.049	0.310908	0.139313	2.23172	0.0256334	0.119347
chr8L:76565385-76574166	NM_001093078	cdca4.L	538.418	476.032	489.739	501.969	601.845	600.583	560.34	0.245208	0.1099	2.2312	0.025668	0.119445
chr1L:152269879-152279208	NM_001094867	adora2a.L	18.7483	8.06834	14.3198	12.0398	19.7136	34.6871	23.6612	0.462605	0.207483	2.2296	0.025774	0.119875
chr5L:137094335-137097163	NM_001088433	id2.L	2710.09	2266.31	2218.62	2884.93	3371.03	2636.22	2883.44	0.249918	0.112115	2.22912	0.0258062	0.11988
chr8L:11508273-11584534	NM_001091671	mvb12b.S	60.9839	71.7186	95.4656	58.3469	44.0657	43.6067	52.7	-0.4487	0.20127	-2.22935	0.0257909	0.11988
chr7L:113544295-113551297	NM_001094418	ccndx.L	48.0985	25.1015	31.5037	50.0117	62.6197	63.4279	55.9265	0.463118	0.207789	2.22879	0.0258278	0.11988
chr3L:74231120-74283723	NM_001095811	taf3.L	1440.4	1384.17	1129.36	1402.18	1492.44	1424.16	1810.08	0.250637	0.112455	2.22877	0.0258294	0.11988
chr3L:49271457-49293281	NM_001087003	metap2.L	2095	1838.68	1931.27	2072.71	2178.94	2245.74	2302.67	0.19454	0.0873264	2.22773	0.0258986	0.120121
chr8L:59958385-59980355	NM_001089138	nek9.L	300.473	363.075	283.533	363.048	274.831	265.604	252.745	-0.307114	0.137882	-2.22737	0.0259224	0.120121
chr4S:105913515-105938533	NM_001095744	chst13.S	62.3036	70.8221	91.647	67.6084	48.7042	58.4726	36.5673	-0.446812	0.200591	-2.22747	0.0259155	0.120121
chr9_10S:27192040-27200075	NM_001092876	slc35c2.S	163.196	131.783	107.876	169.484	156.549	196.23	217.253	0.381204	0.171184	2.22687	0.0259563	0.120152
chr8L:51640207-51652062	NM_001094220	agpat1.L	160.334	193.64	183.294	173.189	144.953	123.883	143.043	-0.350325	0.157315	-2.2269	0.025954	0.120152
chr5L:92521207-92543731	NM_001093375	ptp4a1.L	1250.47	1451.4	1462.53	1174.35	1052.94	1239.82	1121.76	-0.241054	0.108339	-2.22499	0.0260821	0.120671
chr2S:45860137-46015968	NM_001093638	cask.S	308.983	328.112	378.044	329.706	307.301	266.595	244.141	-0.301928	0.135756	-2.22405	0.0261452	0.120899
chr6S:29420694-29433687	NM_001085936	syf2.S	2522.99	2156.94	2398.1	2414.45	2522.18	2576.76	3069.5	0.216364	0.0973325	2.22294	0.0262198	0.121004
chr3S:13651294-13655568	NM_001087288	sap30l.L	97.2132	161.367	91.647	99.0972	75.3756	90.1866	65.6061	-0.429006	0.192994	-2.22289	0.0262229	0.121004
chr7S:15628615-15633201	NM_001088399	cyp26a1.S	1369.79	1600.22	1206.69	1695.77	1237.32	1190.26	1288.46	-0.255278	0.11483	-2.2231	0.0262089	0.121004
chr4S:44624864-44628453	NM_001096671	foxf1.S	255.402	227.706	164.201	266.729	279.47	308.22	286.085	0.343512	0.154492	2.2235	0.0261822	0.121004
chr7S:73058556-73070163	NM_001094968	prpf31.S	5154.36	4707.43	4871.61	4950.23	5481.55	5364.61	5550.7	0.168673	0.0758988	2.22234	0.0262602	0.121113
chr2L:159238979-159277701	NM_001095928	usp12.L	23.1265	11.6543	15.2745	18.5228	28.9906	27.7497	36.5673	0.469705	0.211386	2.22203	0.0262815	0.121148
chr3L:112886950-112901819	NM_001174039	dusp11.L	948.164	884.828	854.417	886.318	1013.51	1009.89	1040.02	0.210695	0.0948299	2.22182	0.0262956	0.121149
chr8S:6222036-6257977	NM_001092059	peli1.S	737.452	676.844	678.761	675.157	804.78	775.01	814.16	0.223033	0.100393	2.2216	0.0263105	0.121155
chr1S:160795625-160818250	NM_001094806	snx18.S	154.511	190.054	186.158	157.444	122.92	119.918	150.571	-0.361332	0.162671	-2.22124	0.0263348	0.121203
chr3L:114619856-114653020	NM_001087014	gfpt2.L	19464.8	20084.8	16357.1	17446.7	18767.4	21908.4	22224.3	0.211257	0.0951479	2.2203	0.0263984	0.121275
chr8L:118032251-118067679	NM_001090918	smad4.2.L	156.251	213.363	205.251	128.734	125.239	134.784	130.137	-0.384663	0.173236	-2.22046	0.0263876	0.121275
chr6L:124381025-124388378	NM_001094318	mrpl53.L	130.093	163.16	156.564	133.364	99.7277	104.061	123.684	-0.375362	0.169083	-2.21999	0.0264192	0.121275
chr8L:36986999-36991649	NM_001096021	vma21.L	541.412	428.518	553.701	475.111	545.024	610.494	635.626	0.271406	0.12225	2.22009	0.0264127	0.121275
chr2L:88592174-88606459	NM_001113426	fuca1.L	467.087	523.546	623.391	417.69	397.751	427.147	412.996	-0.298919	0.134618	-2.2205	0.0263846	0.121275
chr8S:11830278-11832582	NM_001094090	dio3.S	19.899	43.0311	23.8664	16.6706	13.9155	7.92849	13.9816	-0.45747	0.206088	-2.21978	0.0264335	0.121277
chr9_10L:20202422-20294158	NM_001094645	nploc4.L	194.376	216.949	258.712	189.859	155.39	175.418	169.93	-0.343897	0.155033	-2.21822	0.0265396	0.121701
chr6L:115578395-115602417	NM_001092316	lypla1.L	467.095	378.315	458.235	426.025	511.395	525.263	503.338	0.26275	0.118534	2.21667	0.0266454	0.122122
chr9_10S:3420219-3437123	NM_001088625	pabpc1l.S	92.8268	115.646	105.012	108.359	67.2582	83.2492	77.4367	-0.400922	0.181022	-2.21477	0.0267756	0.12258
chr1L:59913623-59981165	NM_001088655	lef1.L	396.881	346.939	294.034	404.724	455.733	377.594	502.263	0.308549	0.139325	2.21461	0.0267871	0.12258
chr1L:59913623-59981165	NM_001172186	lef-1	396.881	346.939	294.034	404.724	455.733	377.594	502.263	0.308549	0.139325	2.21461	0.0267871	0.12258
chr2S:140816848-140852340	NM_001094458	zdhhc20.S	176.45	201.708	190.931	208.382	157.709	152.623	147.345	-0.334786	0.151241	-2.2136	0.0268566	0.122835
chr6L:113587603-113683545	NM_001085601	prkdc.L	248.073	166.746	254.893	222.274	278.31	284.435	281.783	0.334144	0.151026	2.2125	0.0269323	0.123053
chr8L:24752783-24758083	NM_001087251	cdx4.L	2544.36	2235.83	2151.8	2650.62	2872.39	2732.36	2623.17	0.212937	0.0962374	2.21263	0.0269235	0.123053
chr1L:117701138-117784387	NM_001091778	slc44a1.L	1005.89	1101.78	1031.98	1118.78	901.028	963.312	918.485	-0.212561	0.0960824	-2.21228	0.0269474	0.123058
chr9_10L:7307305-7323271	NM_001094341	smarcd2.L	1916.73	2163.21	1806.21	2281.09	1951.65	1695.71	1602.51	-0.235168	0.10641	-2.21001	0.0271044	0.123711
chr8L:91995830-92007364	NM_001092102	sptssa.S	443.884	356.8	405.729	433.434	456.892	498.504	511.942	0.269069	0.121868	2.20787	0.0272535	0.124263
chr9_10L:65414032-65427805	NM_001092967	cybrd1.L	752.111	723.461	635.801	688.123	756.075	779.965	929.24	0.247617	0.112146	2.20799	0.0272447	0.124263
chr1S:88164812-88175892	NM_001086671	sf3a2.S	3179.2	2833.78	2707.41	3256.31	3616.87	3114.91	3545.95	0.211957	0.0960506	2.20673	0.0273332	0.124551
chr5S:103089839-103108103	NM_001093181	gyg1.S	1381.04	1598.43	1557.04	1322.53	1301.1	1298.29	1208.87	-0.22005	0.0997254	-2.20656	0.027345	0.124551
chr8S:2880556-2891751	NM_001094949	psma6.S	652.167	623.055	536.517	617.737	659.827	754.198	721.667	0.24565	0.111398	2.20516	0.0274427	0.124932
chr6S:28945205-29018017	NM_001087204	meox2.S	294.534	299.425	144.153	294.513	346.728	372.639	309.747	0.379378	0.172102	2.20438	0.0274976	0.125015
chr9_10S:21065408-21070926	NM_001087480	cbx4.S	18.609	19.7226	28.6397	28.7104	13.9155	9.91061	10.7551	-0.459166	0.208279	-2.20457	0.0274844	0.125015
chr5S:126468558-126483545	NM_001092485	tp53i3.S	150.472	194.537	164.201	161.149	125.239	143.704	114.004	-0.360261	0.163436	-2.20429	0.0275036	0.125015
chr1L:103807793-103819619	NM_001093314	isyna1.L	400.533	470.653	398.092	458.44	357.164	335.97	382.881	-0.274606	0.124604	-2.20383	0.0275363	0.125099
chr6L:131963013-131971652	NM_001087058	ccne2.L	2389.22	2613.25	2601.44	2433.9	2283.3	2129.79	2273.63	-0.186099	0.0844683	-2.20318	0.0275822	0.125232
chr3L:118005367-118024547	NM_001092575	ggcx.L	191.814	184.675	140.334	170.41	235.404	220.016	200.045	0.339489	0.154102	2.20301	0.027594	0.125232
chr3S:75172344-75183516	NM_001094774	creld2.S	102.248	130.886	127.924	101.876	92.77	78.2938	81.7387	-0.394773	0.179273	-2.20207	0.02766	0.125467
chr4L:142030876-142036876	NM_001096464	fezf2.L	288.114	218.742	61.098	235.24	391.953	404.353	417.298	0.451248	0.204969	2.20154	0.0276977	0.125509
chr8L:118905416-118925075	NM_001127882	efna4.L	1149.39	1071.3	916.47	1160.46	1185.14	1223.96	1339.01	0.234529	0.106521	2.20171	0.0276859	0.125509
chr4L:119344148-119347937	NM_001095866	gpx1.L	389.476	338.87	366.588	346.377	439.498	427.147	418.373	0.263686	0.11979	2.20124	0.0277187	0.125539
chr6L:107953894-107970237	NM_001103189	tyms.L	249.107	243.843	334.13	266.729	234.244	208.123	207.573	-0.324969	0.147679	-2.20051	0.0277709	0.125711
chr4S:1137446-1145641	NM_001092221	rbm4b.S	10104.2	9648.84	8902.17	9892.12	10601.3	11072.1	10508.8	0.171933	0.0781416	2.20027	0.0277876	0.125722
chr7L:88540715-88552821	NM_001091457	spout1.L	906.507	832.832	785.682	884.465	955.531	991.061	989.468	0.217067	0.0987882	2.19729	0.0279994	0.126486
chr7L:111275925-111301217	NM_001094107	kdelr1.S	195.24	160.47	187.113	156.518	195.977	261.64	209.724	0.342124	0.155694	2.19741	0.0279914	0.126486
chr3S:119415657-119421988	NM_001204854	ppan.S	3373.25	3048.04	2864.92	3479.51	3591.36	3619.36	3636.3	0.197877	0.0900543	2.19731	0.0279984	0.126486
chr2S:79222512-79303598	NM_001092692	nxn.S	484.567	529.821	547.973	512.156	433.7	420.21	463.544	-0.250188	0.113901	-2.19654	0.0280531	0.126618
chr2L:136324827-136344351	NM_001096903	MGC154513	899.569	844.486	745.587	879.835	938.136	950.428	1038.94	0.229206	0.104351	2.19648	0.0280574	0.126618
chr2S:68062364-68066233	NM_001091230	LOC100489074.L	92.2975	80.6834	305.49	48.1594	47.5446	39.6425	32.2653	-0.387619	0.17649	-2.19627	0.0280727	0.126622
chr1S:155406987-155416999	NM_001094887	btf3.S	2017.31	1738.28	1735.57	2056.03	2134.87	1950.41	2488.73	0.232678	0.106012	2.19484	0.0281754	0.12702
chr8S:28484244-28493224	NM_001091983	surf4.1.L	1503.04	1432.58	1159.91	1520.72	1719.72	1669.94	1515.39	0.236182	0.107645	2.19409	0.0282291	0.127067
chr9_10L:91167785-91222305	NM_001093134	pdxdc1.L	386.981	304.804	288.306	426.951	442.977	422.192	436.657	0.307688	0.140213	2.19443	0.0282043	0.127067
chr9_10S:41634178-41638791	NM_001197069	nifk.S	3949.61	3752.67	3330.8	3938.88	4390.34	4098.04	4186.96	0.192408	0.0876936	2.19409	0.0282287	0.127067
chr2S:73639942-73694465	NM_001091392	man1c1.S	18.2619	27.7909	25.7757	23.1535	18.554	8.91955	5.37755	-0.450418	0.205369	-2.19321	0.0282922	0.127094
chr1S:106787729-106797886	NM_001096087	carnmt1.S	209.034	250.119	219.571	238.945	162.347	185.328	197.894	-0.3235	0.147471	-2.19365	0.0282605	0.127094
chr3L:81860336-81883287	NM_001135076	tpm1.L	786.248	893.793	788.546	877.056	721.287	758.162	678.646	-0.229901	0.104821	-2.19327	0.0282882	0.127094
chr1L:20720940-20837929	NM_001170449	proml-1	6.96458	17.9296	10.5012	6.48299	5.79812	0	1.07551	-0.350586	0.159851	-2.1932	0.0282929	0.127094
chr3L:98980074-99022951	NM_001095122	anpep.L	18.8931	11.6543	2.86397	18.5228	27.831	27.7497	24.7367	0.445425	0.203168	2.1924	0.0283505	0.127288
chr7S:10905965-10924621	NM_001093221	oat	42.3676	64.5467	52.5061	43.5287	25.5117	33.6961	34.4163	-0.457103	0.208583	-2.19147	0.0284176	0.127524
chr8S:49156041-49178314	NM_001086045	snx12.S	171.688	139.851	141.289	159.296	219.169	208.123	162.402	0.349	0.159502	2.18806	0.0286652	0.12857
chr6L:83740586-83772812	NM_001091235	kdsr.L	200.145	267.152	254.893	168.558	161.188	169.471	179.61	-0.357358	0.163341	-2.18781	0.0286837	0.128588
chr8L:60613784-60625042	NM_001094523	alkbh1.L	202.598	183.779	169.929	176.893	238.883	229.926	216.177	0.317855	0.145373	2.18647	0.0287811	0.128959
chr8S:37399708-37403647	NM_001087704	slc31a2.S	581.937	613.194	739.859	576.986	467.329	499.495	594.757	-0.275237	0.125899	-2.18618	0.0288027	0.12899
chr3L:2810902-2826820	NM_001096247	ribc2.L	272.59	216.949	240.573	264.877	314.258	292.363	306.52	0.298243	0.136453	2.18569	0.0288383	0.129084
chr7L:121169708-121176083	NM_001086380	mrto4.L	1628.27	1680.9	1221.01	1544.8	1804.38	1836.44	1682.1	0.240423	0.110082	2.18403	0.0289599	0.129562
chr9_10L:78585485-78604351	NM_001095959	LOC100127872.L	159.406	188.261	217.662	146.33	149.592	129.829	124.759	-0.364696	0.166999	-2.18383	0.0289749	0.129563
chr6S:7813249-7906542	NM_001088010	xstk2	1088.84	1096.4	884.966	1014.13	1197.89	1143.68	1195.97	0.224445	0.102794	2.18346	0.0290022	0.12962
chr1L:201899902-201948779	NM_001087331	nup155.L	2341.53	1949.85	2420.05	2125.5	2561.61	2477.65	2514.54	0.206479	0.0945917	2.18284	0.0290474	0.129756
chr5L:11105264-11119727	NM_001094018	atf3.L	65.3066	53.7889	104.058	83.3528	53.3427	44.5978	52.7	-0.441329	0.202227	-2.18234	0.0290843	0.129855
chr7L:93758556-93760828	NM_001088503	hes3.1.L	618.751	582.713	535.562	565.873	691.136	601.574	735.648	0.246733	0.113226	2.17911	0.0293233	0.130856
chr8L:528354-531942	NM_001087000	ebp.L	12.0201	17.0332	25.7757	11.1137	3.47887	3.96425	10.7551	-0.414418	0.190363	-2.17698	0.0294817	0.131423
chr2L:96047269-96052153	NM_001092246	chchd2.L	1024.48	832.832	1059.67	919.659	1103.96	1109	1121.76	0.229949	0.105626	2.17702	0.0294794	0.131423
chr5L:1260161-1297688	NM_001095968	mcm8.L	449.157	302.114	499.285	376.94	532.268	527.245	457.091	0.315652	0.145007	2.1768	0.0294953	0.131423
chr7L:1811055-1821404	NM_001095701	mxi1.L	2916.56	2424.09	2865.88	2828.44	3267.82	3105.99	3007.12	0.198441	0.0911865	2.17621	0.0295396	0.131554
chr6S:43809827-43861303	NM_001094699	mrpl3.S	631.662	488.583	674.942	534.384	643.592	760.144	688.326	0.273127	0.125558	2.17531	0.0296069	0.131674
chr1L:113083780-113088481	NM_001095018	txn.L	37.0619	31.3769	26.7304	23.1535	42.9061	46.5799	51.6244	0.456345	0.20978	2.17535	0.0296039	0.131674
chr6S:3205696-3212679	NM_001113431	ccdc12.S	228.053	332.595	262.531	431.582	194.817	31.714	115.079	-0.408843	0.187952	-2.17525	0.0296114	0.131674
chr8S:28088229-28103838	NM_001127796	angptl2.S	11.1461	1.79296	7.63725	7.40913	17.3944	20.8123	11.8306	0.410522	0.188799	2.17438	0.0296763	0.131896
chr4L:138044532-138084066	NM_001092088	eogt.L	148.43	208.88	145.108	160.223	131.038	124.874	120.457	-0.364254	0.167606	-2.17328	0.0297595	0.132199
chr2S:44460756-44475891	NM_001091390	slc19a2.S	129.566	154.195	177.566	120.398	107.845	111.99	105.4	-0.375037	0.17264	-2.17236	0.0298282	0.132438
chr8L:109176896-109259123	NM_001096493	mef2d.L	762.582	778.146	639.62	625.146	1016.99	792.849	722.742	0.27763	0.127859	2.17138	0.0299024	0.1327
chr8S:26823098-26832270	NM_001086236	lmo4.2.S	6670.06	5391.44	5422.45	7436.92	7623.37	7081.13	7065.02	0.236304	0.108844	2.17104	0.0299284	0.132702
chr7L:33423453-33435403	NM_001097726	sirt1.L	123.155	93.2341	107.876	110.211	134.516	157.579	135.514	0.368148	0.169577	2.17098	0.0299328	0.132702
chr1S:85202160-85206156	NM_001086325	cirbp.S	92981.8	91843.7	84668.5	85548.6	95060.2	104799	95970.9	0.168788	0.0777649	2.17049	0.0299694	0.132797
chr6L:34524730-34590713	NM_001171982	meox2.L	119.089	111.164	75.4179	109.285	157.709	130.82	130.137	0.385244	0.177567	2.16957	0.0300396	0.133041
chr2S:116272269-116374594	NM_001088797	gtf2f2.S	2171.86	1923.85	2118.38	2025.47	2357.52	2416.21	2189.74	0.189971	0.0875915	2.16883	0.0300959	0.133223
chr2S:120017057-120031678	NM_001091427	nabp2.S	391.493	441.966	490.693	371.383	321.216	354.8	368.9	-0.284484	0.131331	-2.16616	0.0302993	0.133946
chr2L:58501105-58520059	NM_001091492	nudc.L	3191.63	3047.14	2922.2	3022	3386.1	3422.13	3350.21	0.169827	0.0784033	2.16607	0.0303055	0.133946
chr2S:121402084-121423701	NM_001091917	naca.2.L	2054.76	1914.89	1685.92	2097.71	2217.2	2220.97	2191.89	0.20666	0.095416	2.16589	0.0303198	0.133946
chr1S:19026118-19041913	NM_001096335	qdpr.S	50.1414	8.06834	61.098	31.4888	71.8967	59.4637	68.8326	0.458437	0.211639	2.16613	0.0303013	0.133946
chr8S:419060-422807	NM_001091261	imp4.S	3581.04	3404.84	3050.13	3559.16	3935.77	3834.42	3701.9	0.187443	0.0865698	2.16522	0.0303709	0.134104
chr2L:45177937-45225806	NM_001089049	myo1c.L	439.536	482.307	555.61	419.542	388.474	407.326	383.957	-0.27422	0.12667	-2.16484	0.0304003	0.134167
chr4S:67733550-67746709	NM_001089240	cmpk1.S	1133.8	1036.33	1001.43	1096.55	1247.76	1303.25	1117.45	0.214067	0.0989033	2.1644	0.0304334	0.134245
chr5S:131643203-131687308	NM_001092379	MGC80904	823.035	909.929	901.196	854.829	760.714	789.876	721.667	-0.216655	0.100174	-2.16279	0.0305573	0.134724
[truncated: 8,271 more rows]

## Sheet: control 8.5 vs control 7.2
pos	id	symb	baseMean	control pH 7.2			control pH 8.5			log2FoldChange	lfcSE	stat	pvalue	padj
				Dv7	Dv8	Dv9	Dv10	Dv11	Dv12
chr8L:23411311-23413954	NM_001096084	LOC100490918.L	5444.9	7918.88	6739.58	7275.69	3363.98	3651.46	3719.82	-0.964107	0.0751256	-12.8333	1.06775e-37	8.1832e-34
chr2S:62939470-62958152	NM_001087449	lin28a.S	569.768	257.939	260.736	250.496	859.479	724.587	1065.37	1.4467	0.119151	12.1418	6.34406e-34	2.43104e-30
chr3L:132961060-132963694	NM_001091590	junb.L	886.595	1322.55	1108.33	1217.64	577.607	538.59	554.858	-1.01588	0.0907343	-11.1962	4.25603e-29	1.08727e-25
chr7L:112238295-112246618	NM_001085617	axin2.L	786.696	522.449	541.653	524.535	1021.21	1003.01	1107.32	0.899558	0.0831712	10.8157	2.89944e-27	5.55533e-24
chr8S:37513571-37548625	NM_001094520	hcfc1.S	5449.68	4451.49	4443.81	4359.2	6583.56	6393.48	6466.55	0.536472	0.051581	10.4006	2.46412e-25	3.77701e-22
chr9_10L:17033829-17070488	NM_001094588	dido1.L	2493.71	1914	1993.86	1964.42	3007.02	3007.89	3075.09	0.605682	0.0591904	10.2328	1.41405e-24	1.80621e-21
chr2L:26614318-26651379	NM_001112833	cxadr.L	903.659	667.847	605.424	640.366	1177.16	1115.98	1215.17	0.806719	0.0815968	9.88665	4.75688e-23	5.2081e-20
chr2S:117813678-117844046	NM_001086690	nr4a1.S	329.908	479.733	436.712	473.682	192.921	196.266	200.132	-1.05606	0.107671	-9.80823	1.03774e-22	9.94154e-20
chr9_10S:16282809-16313375	NM_001088192	myt1.S	202.593	93.6465	108.976	101.705	355.806	275.001	280.425	1.18929	0.131435	9.04852	1.44915e-19	1.23156e-16
chr1L:10001649-10039609	NM_001091576	kdm3a.L	2631.69	2125.12	2132.71	2173.48	3083.26	3110.59	3164.97	0.521268	0.05768	9.03723	1.60694e-19	1.23156e-16
chr4L:119940639-119993051	NM_001088176	mst1r.L	930.314	629.239	710.364	668.617	1133.26	1279.15	1161.25	0.758997	0.0861377	8.81143	1.23557e-18	8.60852e-16
chr6L:24025531-24151827	NM_001094602	mllt10.L	270.724	175.793	163.868	171.392	375.444	365.146	372.701	0.948399	0.11059	8.57583	9.83756e-18	6.28292e-15
chr9_10L:46202991-46249156	NM_001087973	gli2.L	871.023	534.771	640.135	576.329	1206.04	996.164	1272.7	0.85661	0.103672	8.26267	1.42447e-16	8.39782e-14
chr5L:138711366-138848241	NM_001087476	rock2.L	1152.33	895.392	879.075	887.095	1457.88	1314.53	1480.02	0.629075	0.0774779	8.11941	4.68446e-16	2.56441e-13
chr2S:63948030-63949984	NM_001086288	id3.S	7279.06	8064.28	8940.9	8570.55	6010.57	6087.67	6000.37	-0.479244	0.0593862	-8.06996	7.03225e-16	3.36845e-13
chr4L:11505449-11547504	NM_001090727	celf1.L	826.425	588.987	618.34	612.115	1005.04	983.612	1150.46	0.713931	0.0883997	8.07617	6.68313e-16	3.36845e-13
chr4L:119275441-119319838	NM_001088983	usp4.L	1893.2	1360.34	1504.68	1407.86	2300.03	2173.76	2612.51	0.670116	0.0834974	8.02559	1.01036e-15	4.55494e-13
chr5L:36675767-36719920	NM_001086701	pygm.L	1339.76	1026.83	931.546	976.558	1633.47	1917.02	1553.12	0.721096	0.0903105	7.98463	1.40949e-15	6.0013e-13
chr9_10S:67379938-67424088	NM_001087801	fn1.S	14330.8	12506.7	12353.1	12551.2	16059.8	16219.3	16294.6	0.36793	0.0461276	7.97635	1.50719e-15	6.07954e-13
chr8L:2137846-2142058	NM_001086363	pou5f3.2.L	3538.26	4263.38	4281.56	4219.82	2793.31	2610.79	3060.71	-0.559384	0.0704597	-7.93905	2.03729e-15	7.80688e-13
chr8S:83795774-83851593	NM_001093561	actn4.S	1155.81	962.752	856.473	884.27	1435.93	1368.16	1427.29	0.601359	0.0775049	7.75898	8.5615e-15	3.12454e-12
chr5L:143562197-143606176	NM_001246310	pum2.L	951.417	666.204	679.689	672.384	1226.84	1060.06	1403.32	0.766093	0.0990737	7.73256	1.05407e-14	3.67199e-12
chr5L:71858295-71863415	NM_001090340	sgk1.L	2628.92	3601.28	2960.12	3242.32	2055.12	1823.45	2091.2	-0.653222	0.0862124	-7.57689	3.53949e-14	1.17942e-11
chr8L:109176896-109259123	NM_001096493	mef2d.L	1416.15	1123.76	1063.93	1039.65	1720.11	1603.22	1946.2	0.646059	0.0855779	7.54938	4.37351e-14	1.39661e-11
chr7L:107270526-107294001	NM_001092964	leng8.L	1560.86	1173.87	1289.15	1244.95	1904.95	1764.11	1988.14	0.568546	0.0762906	7.45236	9.16826e-14	2.81062e-11
chr1L:132871758-132901213	NM_001094405	golm1.L	918.869	663.74	721.665	664.851	1204.89	1020.13	1237.94	0.678065	0.0926363	7.31965	2.48623e-13	7.16021e-11
chr1S:9576712-9622656	NM_001095502	kdm3a.S	6242.07	5061.02	5504.51	5155.89	7246.65	6979.99	7504.36	0.447365	0.0611346	7.3177	2.52251e-13	7.16021e-11
chr9_10L:17595958-17629607	NM_001161390	LOC100301955	114.079	59.1451	68.6147	58.3863	157.109	173.444	167.776	0.98954	0.139818	7.07733	1.46954e-12	4.02235e-10
chr4S:106682481-106933741	NM_001094988	LOC495321	1500.97	1267.51	1235.06	1219.52	1789.43	1697.93	1796.4	0.478892	0.0677762	7.06579	1.59701e-12	4.22052e-10
chr3L:29451374-29482406	NM_001094580	slc22a4.L	10658.1	9100.96	9226.66	9054.59	12230.2	11564.9	12771.3	0.40193	0.0573685	7.00612	2.45018e-12	6.2594e-10
chr9_10S:40354536-40382713	NM_001171875	suz12	2175.29	1846.64	1821.92	1829.75	2613.09	2422.52	2517.83	0.437551	0.0632125	6.92191	4.45586e-12	1.1016e-09
chr1S:113297026-113298912	NM_001086129	gadd45g.S	611.017	788.602	713.593	745.838	471.327	476.972	469.772	-0.60284	0.0886255	-6.8021	1.03103e-11	2.46932e-09
chr7L:108884246-108928886	NM_001093428	kif18b.L	170.771	97.7538	108.976	98.88	216.025	221.37	281.623	0.909215	0.134068	6.78176	1.18723e-11	2.75724e-09
chr9_10L:2362502-2381623	NM_001091729	med1	763.163	566.808	599.773	582.921	984.242	840.977	1004.26	0.623241	0.0919911	6.77501	1.24399e-11	2.80409e-09
chr2S:60294881-60311313	NM_001086042	arg2.S	212.56	399.23	234.904	308.882	91.2618	115.249	125.832	-0.977497	0.145161	-6.73388	1.65193e-11	3.61726e-09
chr1L:101958833-101965344	NM_001127751	pnhd.L	2211.37	2576.92	2664.67	2548.28	1725.89	1783.51	1968.97	-0.478772	0.0713158	-6.71341	1.90123e-11	4.04751e-09
chr7S:83224035-83237147	NM_001094372	axin2.S	1355.48	901.963	1143.85	997.276	1718.96	1532.47	1838.34	0.65552	0.0978423	6.69977	2.08753e-11	4.32402e-09
chr7S:53400943-53431132	NM_001092020	trim29.S	1099.77	940.572	821.762	841.893	1418.6	1303.11	1272.7	0.565404	0.0845122	6.6902	2.22862e-11	4.49476e-09
chr1L:110456255-110471824	NM_001088511	gatad2a.L	2415.04	1946.04	2071.36	1932.4	3052.07	2654.16	2834.21	0.489297	0.0732402	6.68072	2.37776e-11	4.6726e-09
chr6L:49236598-49258196	NM_001095528	LOC496380	331.724	247.26	216.338	242.021	391.617	447.304	445.804	0.732031	0.110103	6.64863	2.95836e-11	5.66821e-09
chr9_10S:8373946-8415649	NM_001177440	zmynd8.S	1010.73	762.315	853.244	798.574	1211.82	1151.35	1287.08	0.548673	0.0826211	6.64084	3.11907e-11	5.83037e-09
chr8S:93155409-93232884	NM_001101795	mef2d.S	1690.98	1150.04	1385.21	1265.66	2124.44	1841.71	2378.82	0.65203	0.0983932	6.62678	3.43092e-11	6.26062e-09
chr9_10S:87365948-87369326	NM_001092605	hist2h3d.L	13362.5	15004	15248.6	14905.5	11165.1	12049.8	11801.8	-0.35526	0.0536458	-6.62232	3.536e-11	6.30231e-09
chr2L:135956626-135988778	NM_001085665	nr4a1.L	209.975	342.549	246.206	283.456	129.384	131.224	127.03	-0.873469	0.132353	-6.59955	4.12403e-11	7.18331e-09
chr7L:102575481-102582275	NM_001091231	cnfn.1.L	396.365	602.13	443.978	543.369	246.06	243.05	299.599	-0.806555	0.122471	-6.58566	4.52883e-11	7.7131e-09
chr6L:55060319-55067678	NM_001114811	blvra.L	2708.15	2234.37	1959.15	2066.12	3358.21	3739.32	2891.73	0.60609	0.0921452	6.57755	4.78251e-11	7.96808e-09
chr3S:53460683-53533511	NM_001090443	adam10.S	647.568	472.34	498.062	492.517	732.405	780.5	909.583	0.642097	0.0981945	6.53903	6.19185e-11	1.00967e-08
chr9_10L:37009262-37014024	NM_001086596	h3f3b	18351.2	20901.2	20963.8	20874	14725.5	16500	16142.4	-0.389365	0.0596206	-6.53071	6.54583e-11	1.04515e-08
chr7S:48214135-48275748	NM_001251824	aplp2.S	2084.84	1803.11	1575.72	1705.45	2333.53	2424.8	2666.43	0.506514	0.0793192	6.38576	1.70544e-10	2.66745e-08
chr8S:25642236-25645073	NM_001093908	fos.S	87.2664	144.577	120.278	122.423	47.3637	42.22	46.7375	-0.937535	0.14727	-6.36612	1.93874e-10	2.96446e-08
chr9_10L:105980748-106002823	NM_001297635	slx4.L	680.674	501.912	570.713	540.544	822.512	799.898	848.465	0.558951	0.0878377	6.36345	1.97269e-10	2.96446e-08
chr2L:136695559-136704755	NM_001086916	rnd1.L	4574.09	5378.1	5020.17	5193.56	4084.83	3820.34	3947.52	-0.379793	0.0597736	-6.35385	2.09989e-10	3.09492e-08
chr9_10S:4711954-4730895	NM_001085960	ubtf.S	3165.96	2434.81	2653.37	2488.01	3601.96	3497.41	4320.22	0.541181	0.0853663	6.33952	2.30486e-10	3.33292e-08
chr9_10S:33737516-33742611	NM_001091579	h3f3b.L	9658.25	10692.1	10936.4	10721.4	8549.73	8774.91	8274.93	-0.327611	0.0517843	-6.32645	2.50861e-10	3.56037e-08
chr8L:23400689-23407736	NM_001088600	LOC398207.S	1701.18	2446.31	2037.45	2284.6	1143.66	855.811	1439.27	-0.776049	0.123374	-6.29024	3.16978e-10	4.33807e-08
chr2S:18902197-18933796	NM_001096632	tiam1.S	111.893	65.7168	60.5424	62.1532	191.765	143.776	147.403	0.90405	0.143689	6.2917	3.14009e-10	4.33807e-08
chr4L:126291677-126382789	NM_001091298	tmcc1.L	834.077	952.894	1029.22	1003.87	679.265	632.159	707.054	-0.51905	0.0836008	-6.20868	5.34311e-10	7.18415e-08
chr7L:39386667-39415129	NM_001088086	nolc1.L	18842.2	16117.1	16826.7	16503.5	22176.6	21224.1	20205	0.350346	0.0565862	6.19137	5.96442e-10	7.88126e-08
chr8S:29099194-29141988	NM_001087605	notch1.S	2310.24	1820.36	2034.22	1961.59	2785.22	2546.89	2713.17	0.440845	0.0714647	6.16871	6.88479e-10	8.94322e-08
chr5L:126622971-126657332	NM_001087629	per2.L	156.473	95.2894	106.555	86.6377	187.145	249.897	213.315	0.842203	0.136965	6.14904	7.79516e-10	9.95702e-08
chr4S:74283338-74285670	NM_001091219	ier5.S	1600.13	1950.15	1829.19	1914.51	1237.23	1223.24	1446.46	-0.501399	0.0817277	-6.13499	8.51622e-10	1.06997e-07
chr7L:108277337-108329640	NM_001089059	otog.L	32992.4	29483	27859.2	28491.6	39466.7	37410.3	35243.7	0.369746	0.0603637	6.12529	9.05159e-10	1.11889e-07
chr3S:15342466-15388848	NM_001095634	tcof1.S	6326.01	4850.72	5655.47	5307.5	7846.21	7315.47	6980.66	0.454891	0.0743907	6.11489	9.66264e-10	1.17547e-07
chr1S:9128458-9131318	NM_001088148	foxi4.2.L	969.458	1354.59	1068.77	1217.64	665.403	684.649	825.695	-0.640864	0.105134	-6.09569	1.08964e-09	1.30485e-07
chr8L:23381502-23429204	NM_001088443	acod1.L	22182.2	29448.5	27573.4	28118.7	14613.4	12907.9	20431.5	-0.691137	0.113474	-6.09073	1.12399e-09	1.32527e-07
chr2S:119022180-119028901	NM_001094758	rhebl1.S	8836.06	9881.35	9897.47	9889.89	7709.89	7493.48	8144.3	-0.334087	0.0550848	-6.06496	1.31989e-09	1.53267e-07
chr8L:48980416-48994921	NM_001091205	arhgap35.L	821.975	627.596	682.918	655.433	1080.12	964.214	921.567	0.537946	0.0888584	6.05396	1.41323e-09	1.61657e-07
chr1S:11589167-11617802	NM_001088495	tacc3.S	1259.99	1090.9	1051.82	1043.42	1504.09	1464.01	1405.72	0.430626	0.0712105	6.04723	1.47358e-09	1.66081e-07
chr7L:76184807-76309281	NM_001096683	cadm1.L	805.292	683.455	655.472	653.55	965.758	945.956	927.559	0.474297	0.0786697	6.02897	1.65009e-09	1.8328e-07
chr9_10S:19920535-19940995	NM_001091399	cdc42ep4.S	839.777	1040.79	962.22	972.791	670.024	709.753	683.086	-0.488363	0.0810514	-6.02535	1.68748e-09	1.84755e-07
chr1S:168794109-168845780	NM_001090507	zfr.S	3742.6	3049.26	3391.99	3262.1	4224.62	4273.35	4254.31	0.376871	0.0626325	6.01717	1.7749e-09	1.91589e-07
chr7S:3871472-3901126	NM_001172061	a2ma	15921.7	14130.8	14180.6	14134.2	18229.3	17899	16956.1	0.312959	0.0522397	5.99083	2.08778e-09	2.22232e-07
chr7L:69012895-69122037	NM_001170598	robo3.L	1225.25	984.931	1084.11	1003.87	1389.72	1417.22	1471.63	0.446315	0.0750201	5.94927	2.69334e-09	2.82763e-07
chr3S:90816806-90822780	NM_001094761	LOC495060	497.745	660.454	570.713	603.639	359.271	400.52	391.876	-0.590491	0.0995965	-5.92883	3.05096e-09	3.15981e-07
chr5L:122742390-122785530	NM_001085992	epha4.L	545.24	464.947	397.158	424.713	668.868	645.852	669.904	0.557892	0.0945069	5.90319	3.56549e-09	3.64346e-07
chr6L:121396573-121491721	NM_001161395	ncoa2.L	718.151	602.13	544.881	597.989	890.669	829.566	843.671	0.507371	0.0860219	5.89816	3.6757e-09	3.70665e-07
chr1L:134655255-134659141	NM_001088462	tdgf1.3.L	739.755	868.284	971.907	911.58	525.622	503.217	657.92	-0.612142	0.103952	-5.88868	3.89284e-09	3.83943e-07
chr1L:97912840-97927705	NM_001090346	ptbp1.S	3850.63	3427.95	3303.19	3338.38	4404.83	4131.86	4497.58	0.356914	0.0606166	5.88806	3.90757e-09	3.83943e-07
chr6L:138446645-138459509	NM_001090338	rad21.L	6987.71	6379.46	5995.31	6203.07	7789.6	7633.83	7925	0.318972	0.0542677	5.87775	4.15877e-09	4.03453e-07
chr3L:98121964-98233805	NM_001088801	furin.L	966.152	796.817	830.642	798.574	1085.9	1128.53	1156.45	0.443	0.0756936	5.85254	4.84117e-09	4.63784e-07
chr5S:45977911-46076366	NM_001096388	qki.S	2648.38	2216.3	2370.03	2264.82	3144.49	2892.64	3001.98	0.380661	0.0650726	5.84979	4.92202e-09	4.65708e-07
chr6L:91456488-91520033	NM_001088815	nup153.L	2797.3	2167.83	2520.18	2345.81	3281.96	3072.93	3395.06	0.440052	0.0756172	5.81947	5.90355e-09	5.48462e-07
chr8S:90032617-90071274	NM_001090153	arnt.S	284.671	203.722	222.796	198.702	392.773	338.901	351.13	0.660226	0.113471	5.81844	5.93976e-09	5.48462e-07
chr9_10L:100353219-100371546	NM_001095863	rac1.L	790.77	645.668	579.592	614.94	910.308	883.197	1110.91	0.577489	0.100083	5.77011	7.92201e-09	7.22789e-07
chr4L:8822814-8874896	NM_001088582	ckap5	2501.61	2038.86	1955.92	1984.19	2953.88	2606.23	3470.56	0.533568	0.0927613	5.75205	8.81674e-09	7.94959e-07
chr8L:14073413-14076575	NM_001086817	tsc22d3.L	506.647	717.135	548.11	645.075	356.961	365.146	407.455	-0.638493	0.111223	-5.74064	9.43175e-09	8.1739e-07
chr4L:8822814-8874896	NM_001088584	ckap5.S	2499.2	2036.4	1955.12	1982.31	2951.57	2601.67	3468.16	0.533159	0.0928919	5.73956	9.49213e-09	8.1739e-07
chr3L:119054548-119071211	NM_001091153	ddx56.L	1383	1178.8	1207.62	1190.33	1581.49	1574.69	1565.11	0.380647	0.0663028	5.74104	9.40965e-09	8.1739e-07
chr4L:8835610-8874444	NM_001096700	ckap5.L	2293.18	1858.96	1747.66	1794.91	2745.94	2371.17	3240.46	0.557702	0.0970798	5.74478	9.20404e-09	8.1739e-07
chr9_10S:102048562-102049448	NM_001088604	cla	3705.57	4013.66	4477.72	4292.34	3137.56	2954.26	3357.91	-0.410207	0.0721475	-5.68567	1.303e-08	1.10958e-06
chr1L:7129620-7194655	NM_001087445	adam33.L	1056.54	737.671	875.847	759.022	1187.56	1191.29	1587.88	0.626151	0.110456	5.66876	1.43837e-08	1.20651e-06
chr7S:16883661-16887454	NM_001097921	ventx1.2.S	1301.14	1513.13	1458.67	1490.73	1117.09	1085.17	1142.07	-0.393477	0.069426	-5.66758	1.44831e-08	1.20651e-06
chr4L:11340040-11375646	NM_001091496	nup160.L	867.975	736.028	726.509	689.335	1006.19	967.637	1082.15	0.465423	0.0822484	5.65876	1.52474e-08	1.25652e-06
chr9_10L:34228149-34261643	NM_001091411	rbl1.L	2850.59	2438.92	2562.15	2516.26	3244.99	3234.97	3106.24	0.336886	0.0596521	5.64751	1.62793e-08	1.32728e-06
chr4L:76185592-76187711	NM_001090797	jun.L	53.6591	71.4671	91.2172	85.696	25.4147	19.3984	28.7615	-0.859506	0.152671	-5.6298	1.80418e-08	1.4555e-06
chr3L:66630244-66636101	NM_001088725	spam1.L	1840.74	1159.08	1669.36	1389.03	2424.79	2257.06	2145.13	0.596358	0.106474	5.60098	2.13142e-08	1.70019e-06
chr8S:94228733-94244624	NM_001093038	gabpb2.S	651.589	559.414	489.99	499.109	787.855	722.304	850.862	0.539633	0.0963747	5.59933	2.15186e-08	1.70019e-06
chr4L:128632789-128854092	NM_001087913	plxna1.L	1783.37	1582.95	1491.76	1534.05	2105.95	1939.84	2045.66	0.38115	0.0682478	5.58479	2.33981e-08	1.82983e-06
chr6L:128806130-128857363	NM_001086055	esrp1.L	2960.32	2696.03	2555.7	2596.31	3298.13	3280.61	3335.14	0.324366	0.058118	5.58115	2.38928e-08	1.83114e-06
chr2L:80999325-81086312	NM_001087795	epb41.L	2719.01	2461.1	2170.65	2370.3	3209.18	3066.09	3036.74	0.388835	0.0696638	5.58159	2.38326e-08	1.83114e-06
chr2L:162879741-162898738	NM_001093594	mmp3.L	151.683	82.9675	91.2172	79.104	172.127	180.291	304.393	0.829391	0.149083	5.56327	2.64768e-08	2.00909e-06
chr9_10S:102057561-102060103	NM_001088861	cldn4L2	1882.74	2374.02	2062.48	2245.99	1437.09	1457.16	1719.7	-0.486206	0.0875863	-5.55116	2.83782e-08	2.13226e-06
chr2L:79514824-79563320	NM_001136165	zmym4.L	721.407	588.166	598.159	586.688	832.909	921.994	800.529	0.48019	0.0873015	5.50036	3.79014e-08	2.82016e-06
chr7S:79247288-79321953	NM_001094370	tead4.S	1862.2	1592.81	1595.9	1546.3	2194.91	1961.52	2281.75	0.414107	0.0753199	5.49798	3.84175e-08	2.83108e-06
chr8L:21220219-21226159	NM_001090858	wnt11b.L	3904.52	4821.15	4371.97	4521.17	2928.47	3144.82	3639.53	-0.457284	0.0835528	-5.47299	4.42501e-08	3.22983e-06
chr3L:120447244-120468676	NM_001190397	LOC100462920	1462.36	1272.44	1271.39	1236.47	1735.13	1664.84	1593.87	0.37949	0.069587	5.45346	4.94001e-08	3.57172e-06
chr7L:21858060-21859866	NM_001088138	ventx2.1.L	2892.08	3273.52	3222.47	3292.23	2492.95	2678.12	2393.2	-0.353864	0.0651361	-5.43268	5.55137e-08	3.97623e-06
chr1L:101492560-101570823	NM_001093964	mast3.L	226.101	147.041	179.205	158.208	266.854	284.129	321.17	0.670259	0.124026	5.4042	6.50983e-08	4.61957e-06
chr2S:31738003-31742028	NM_001097736	sat1.S	510.95	596.38	619.954	614.94	417.032	379.98	437.415	-0.508236	0.0945075	-5.37773	7.54302e-08	5.30364e-06
chr3S:10264000-10274804	NM_001095532	foxm1.S	890.257	742.6	693.412	684.627	1114.78	919.711	1186.41	0.530786	0.0988135	5.3716	7.80427e-08	5.43745e-06
chr5L:16293674-16333561	NM_001088543	capn8.L	2683.77	2372.38	2182.75	2268.59	2826.81	3103.74	3348.32	0.413087	0.0769461	5.36852	7.93842e-08	5.48108e-06
chr8L:20676744-20735294	NM_001087479	efnb1.L	298.182	230.009	197.772	197.76	359.271	330.914	473.367	0.687403	0.128635	5.34382	9.10072e-08	6.22749e-06
chr5L:69852145-69854724	NM_001095192	LOC495835.L	639.773	1142.65	578.785	876.736	435.515	413.071	391.876	-0.746349	0.139768	-5.3399	9.2997e-08	6.30733e-06
chr8L:118374353-118402262	NM_001086467	celf3.L	238.594	164.292	192.928	164.8	329.236	280.706	299.599	0.643943	0.120873	5.32742	9.96152e-08	6.69694e-06
chr4S:22714811-22717393	NM_001085897	myod1.S	2754.9	2504.63	2301.42	2375.95	3253.08	3140.26	2954.05	0.360504	0.0677709	5.31945	1.04081e-07	6.93633e-06
chr5L:56653089-56661769	NM_001171779	mpc1.L	1285.73	1591.17	1385.21	1484.14	1042	1128.53	1083.35	-0.421148	0.0800712	-5.25966	1.44319e-07	9.53501e-06
chr5L:152601805-152635328	NM_001094249	extl3.L	1252.92	1111.44	1063.93	1068.85	1385.1	1477.7	1410.51	0.374471	0.0712634	5.25474	1.48233e-07	9.70992e-06
chr7L:56988501-56992990	NM_001097118	admp2.L	289.039	349.121	377.785	360.677	182.524	231.639	232.489	-0.614679	0.117381	-5.23662	1.63547e-07	1.06223e-05
chr9_10S:2366179-2388259	NM_001114843	kpnb1.L	1661.55	1409.63	1505.49	1396.56	1944.22	1798.34	1915.04	0.36923	0.0707691	5.21739	1.8146e-07	1.16866e-05
chr1L:99166289-99174916	NM_001085964	anp32c.L	22133.1	25633.7	23412.1	24263.3	20284.4	19743	19462	-0.290802	0.0561385	-5.18008	2.21788e-07	1.41648e-05
chr3S:3501933-3509915	NM_001088255	wee2	221.587	254.653	309.977	302.29	184.834	148.341	129.427	-0.677711	0.132149	-5.12837	2.92267e-07	1.85119e-05
chr5L:62236105-62282082	NM_001090215	med23.L	1891.27	1475.34	1729.9	1625.4	2190.28	2066.5	2260.18	0.400969	0.0787233	5.09339	3.51711e-07	2.20943e-05
chr6L:138551228-138580246	NM_001095453	slc30a8.L	9884.77	7139.31	8513.87	7771.97	11042.7	14497.4	10343.4	0.531919	0.104505	5.08992	3.58218e-07	2.23202e-05
chr7L:109605315-109630549	NM_001097050	kmt5c.L	883.388	726.992	785.437	742.071	1054.71	990.459	1000.66	0.402121	0.0794473	5.06149	4.16003e-07	2.57117e-05
chr3L:132041612-132107056	NM_001099884	dnm2.L	582.649	507.662	432.676	482.158	676.955	661.827	734.617	0.483076	0.0960976	5.02693	4.98386e-07	3.0557e-05
chr4S:64770941-64800582	NM_001087969	ptch2.S	456.441	329.406	403.616	357.852	572.986	528.321	546.469	0.516024	0.103389	4.99109	6.00381e-07	3.65184e-05
chr9_10L:91167785-91222305	NM_001093134	pdxdc1.L	632.068	518.341	518.243	533.952	752.044	680.084	789.743	0.451665	0.0905871	4.98597	6.16505e-07	3.72039e-05
chr5S:17892977-17960273	NM_001096196	ubr2.S	145.499	98.5752	106.555	96.0549	183.679	170.021	218.108	0.674071	0.135384	4.97894	6.39326e-07	3.82796e-05
chr3L:63463944-63468834	NM_001096696	pim3.L	223.157	303.94	264.772	272.156	154.799	180.291	162.982	-0.605268	0.121669	-4.9747	6.53499e-07	3.8825e-05
chr6L:60188827-60192482	NM_001093718	lsm5.L	625.565	818.996	717.629	747.721	406.635	512.345	550.064	-0.541625	0.109019	-4.96818	6.75826e-07	3.98425e-05
chr7L:108455614-108475366	NM_001090503	nucb1.L	600.659	525.735	474.652	504.759	688.507	720.022	690.277	0.435568	0.088482	4.92267	8.53692e-07	4.99443e-05
chr4L:40703141-40714755	NM_001086519	sall1.L	3824.46	2942.47	3530.83	3118.96	4895.79	4023.45	4435.27	0.433515	0.0881188	4.91967	8.66912e-07	5.03334e-05
chr8L:58605970-58631012	NM_001088631	pak5.L	109.729	82.9675	61.3496	69.6869	144.402	135.789	164.18	0.704369	0.143542	4.90707	9.24473e-07	5.32719e-05
chr7L:122421016-122438769	NM_001086488	kirrel2.L	2358.31	2595.81	2639.65	2615.14	2119.82	2015.15	2164.3	-0.30408	0.0619988	-4.90461	9.36134e-07	5.35413e-05
chr2S:158659544-158685581	NM_001088090	numa1.S	609.063	510.127	505.327	497.225	718.543	654.981	768.172	0.450534	0.0919307	4.9008	9.5445e-07	5.40368e-05
chr5L:40405815-40414149	NM_001093280	srsf7.L	1369.4	1486.84	1650.79	1565.13	1206.04	1084.03	1223.56	-0.389965	0.0795865	-4.89989	9.58899e-07	5.40368e-05
chr6L:640513-651619	NM_001094891	znf268.S	5154.81	4510.64	4599.61	4556.96	6086.82	5849.18	5325.68	0.320592	0.0656063	4.8866	1.02592e-06	5.73915e-05
chr1L:187163011-187178048	NM_001090813	enc1.L	1538.38	1357.87	1311.75	1347.59	1668.13	1859.96	1684.95	0.353362	0.0728677	4.84937	1.23857e-06	6.87854e-05
chr9_10S:52388170-52432727	NM_001094140	epc2.S	1328.14	1168.12	1155.96	1111.22	1630.01	1459.44	1444.07	0.372724	0.0769512	4.84364	1.27485e-06	7.01233e-05
chr7S:77691776-77766795	NM_001096584	prr12.S	2408.19	2029.01	2230.38	2123.57	2730.92	2600.52	2734.74	0.320828	0.0662501	4.84269	1.28096e-06	7.01233e-05
chr1L:45523233-45567994	NM_001093936	rapgef2.L	699.556	538.057	628.834	583.863	823.667	781.641	841.275	0.435775	0.0903176	4.82492	1.40061e-06	7.61294e-05
chr5S:71872446-71893573	NM_001088621	ttk.S	500.933	421.409	393.929	433.189	593.78	579.669	583.619	0.443802	0.0921086	4.81824	1.44827e-06	7.8166e-05
chr4S:13182517-13261499	NM_001095487	ppfia1.S	409.421	332.691	337.423	323.95	512.915	445.022	504.525	0.486463	0.101156	4.80905	1.51649e-06	8.12755e-05
chr9_10L:27175176-27176997	NM_001085644	nog.L	261.76	333.513	302.712	322.066	203.318	208.818	200.132	-0.540568	0.112653	-4.79853	1.59831e-06	8.50657e-05
chr2S:154290909-154292234	NM_001095549	tsku.S	1289.4	947.965	1159.99	1089.56	1665.82	1469.71	1403.32	0.451495	0.0943694	4.78433	1.71557e-06	9.06766e-05
chr5S:12097679-12100612	NM_001087825	mixl1.S	140.266	198.793	177.591	184.576	85.4858	75.3114	119.84	-0.678441	0.142359	-4.76571	1.88189e-06	9.87863e-05
chr9_10L:1710238-1720491	NM_001090971	cdc6.L	2582.67	3033.65	2756.7	2911.78	2298.87	2126.98	2368.03	-0.336902	0.0707324	-4.76305	1.90687e-06	9.94165e-05
chr4L:114438925-114464755	NM_001087124	adsl.L	754.557	1014.5	786.244	906.871	616.884	555.707	647.134	-0.496176	0.104227	-4.76055	1.93071e-06	9.99793e-05
chr4L:90535264-90572764	NM_001093914	dhx9.L	4853.03	4481.07	4253.3	4333.77	5183.44	5258.1	5608.5	0.28459	0.059818	4.7576	1.9591e-06	0.000100769
chr2L:134110534-134116199	NM_001094570	tsc22d1.L	2254.53	2364.16	2730.87	2528.5	2001.98	1914.73	1986.94	-0.346338	0.0732646	-4.72721	2.27622e-06	0.0001163
chr2L:13507608-13584697	NM_001087486	itsn1.L	761.93	648.954	628.834	643.191	872.186	811.309	967.106	0.420214	0.0893965	4.70056	2.59444e-06	0.000129116
chr4S:77318765-77389390	NM_001093498	fnbp1l.S	859.225	750.815	739.424	724.179	1029.3	926.558	985.082	0.378304	0.0804465	4.70256	2.56924e-06	0.000129116
chr5L:137917799-137944569	NM_001095602	grhl1.L	2047.63	1949.33	1423.96	1682.84	2412.09	2456.75	2360.84	0.457011	0.0971604	4.70368	2.55519e-06	0.000129116
chr9_10S:4314063-4331324	NM_001096764	myst2	1416.65	1224.8	1267.35	1176.2	1640.4	1483.41	1707.72	0.3686	0.0783949	4.70183	2.57834e-06	0.000129116
chr8S:77368255-77397721	NM_001097950	ppp1r37.L	179.991	115.826	149.338	129.957	239.129	216.805	228.894	0.60705	0.12926	4.69634	2.64859e-06	0.00013096
chr3L:37703549-37729176	NM_001096472	fbxo38.L	586.774	499.448	500.484	484.983	657.316	662.968	715.443	0.412942	0.0880354	4.69064	2.72352e-06	0.000133802
chr7L:21841031-21843920	NM_001088235	ventx1.1.L	981.214	1363.62	993.702	1202.57	764.751	860.375	702.261	-0.517829	0.11043	-4.68919	2.74287e-06	0.000133894
chr4S:7505041-7527097	NM_001086934	tnnt3.S	213.74	151.149	163.868	160.091	272.63	305.81	228.894	0.595277	0.126993	4.68746	2.76612e-06	0.000134174
chr6S:15970936-16002642	NM_001090862	itgb1.S	2893.26	2464.38	2528.25	2452.22	3175.68	3021.58	3717.43	0.381258	0.0814423	4.68133	2.8502e-06	0.000137383
chr1S:25247112-25310021	NM_001096594	pds5a.S	4056.16	3743.39	3642.23	3604.88	4593.13	4289.32	4464.03	0.269605	0.057948	4.65253	3.27884e-06	0.000157056
chr2L:106909630-106922721	NM_001086114	tab3.S	769.008	628.417	693.412	638.483	888.359	927.699	837.679	0.398918	0.0859306	4.64233	3.44508e-06	0.000163994
chr9_10S:39974882-39979940	NM_001086964	kpna2.S	2669.51	2338.7	2429.77	2307.2	3059	3112.87	2769.49	0.319469	0.0688839	4.63779	3.52155e-06	0.0001666
chr1S:85202160-85206156	NM_001086325	cirbp.S	114203	120688	129628	124907	99614	101978	108402	-0.265409	0.057392	-4.62448	3.75534e-06	0.00017657
chr2S:114728690-114782453	NM_001087213	elf1.S	968.416	795.995	804.81	822.117	1277.67	1106.85	1003.06	0.432773	0.0938782	4.60994	4.02781e-06	0.000187086
chr5S:52542846-52549210	NM_001092720	sgk1.S	860.326	1154.97	908.136	969.024	695.438	717.74	716.641	-0.450672	0.0977587	-4.61004	4.02592e-06	0.000187086
chr6L:95794788-95877961	NM_001091364	pqlc1.1.L	516.738	446.874	406.038	425.655	554.502	654.981	612.381	0.45107	0.0982652	4.59033	4.42539e-06	0.000204314
chr9_10S:56753716-56768241	NM_001090024	gca.S	1876.78	2180.98	2031	2118.86	1588.42	1568.99	1772.43	-0.338439	0.0739854	-4.57441	4.77573e-06	0.000219169
chr5L:31387621-31403155	NM_001091218	b3gnt2.L	564.571	666.204	753.955	718.528	471.327	293.258	484.152	-0.592252	0.129855	-4.56088	5.0939e-06	0.000231004
chr1S:86659096-86662096	NM_001093885	rps28p9.S	2371.38	3002.44	2474.17	2779	1839.1	1902.18	2231.41	-0.419893	0.0920392	-4.56211	5.06429e-06	0.000231004
chr6L:41957624-41991080	NM_001088303	dazl.L	365.888	457.553	408.459	452.965	316.528	259.025	300.798	-0.499694	0.109731	-4.55381	5.26826e-06	0.000237505
chr7L:27307771-27365703	NM_001093687	mms19.L	2122.5	1832.68	1963.19	1906.03	2388.98	2307.27	2336.87	0.288969	0.0635634	4.54616	5.46341e-06	0.000244863
chr6L:108408625-108426147	NM_001199072	esco1.L	939.184	698.241	886.341	767.497	1063.95	1128.53	1090.54	0.429071	0.0946166	4.53484	5.76462e-06	0.000256861
chr2L:88977886-89001758	NM_001092388	pabpc4.L	566.19	470.697	498.062	475.566	638.833	657.263	656.721	0.395728	0.0873742	4.52912	5.92303e-06	0.000262394
chr9_10L:99696423-99768307	NM_001096405	baiap2l1.L	515.16	433.731	427.833	426.597	643.454	610.478	548.866	0.43181	0.0955725	4.51814	6.23849e-06	0.00027478
chr1L:68078775-68082880	NM_001086059	h2afz.L	17658.5	20807.6	19315.4	19944.6	13555.3	15364.7	16963.3	-0.360035	0.0797475	-4.51469	6.34103e-06	0.000276329
chr5L:35018325-35056212	NM_001088647	bub1.L	1722.36	1568.17	1527.28	1482.26	1909.57	1836	2010.91	0.312207	0.069156	4.51453	6.34577e-06	0.000276329
chr8S:92596216-92602280	NM_001096079	isg20l2.S	2336.16	1937.82	2195.67	2080.25	2571.5	2586.83	2644.86	0.310792	0.0690392	4.50168	6.7418e-06	0.000291916
chr3L:108908527-108932202	NM_001085692	pias1.L	517.6	397.587	470.616	412.471	581.072	645.852	598	0.448326	0.0998187	4.4914	7.07549e-06	0.000304644
chr7L:112635314-112670981	NM_001086237	cpt1a.L	217.065	167.578	168.711	174.217	258.768	265.872	267.242	0.521663	0.116519	4.47706	7.56791e-06	0.000324025
chr9_10S:3559571-3576745	NM_001095707	sdc4.S	840.748	929.072	996.124	968.083	717.387	657.263	776.561	-0.389546	0.0873064	-4.46183	8.12641e-06	0.000346004
chr2S:155606197-155619478	NM_001091846	rps3.S	1888.28	2103.76	2093.15	2109.44	1687.77	1566.7	1768.83	-0.31032	0.0696024	-4.45847	8.25454e-06	0.000349518
chr4L:23131768-23161461	NM_001094743	ehd1.L	2224.48	1970.68	1958.34	1968.18	2338.15	2425.94	2685.61	0.317398	0.071447	4.44242	8.89511e-06	0.000374572
chr6L:19687373-19773497	NM_001092493	zeb1.S	75.3709	51.752	44.3978	44.2606	106.28	83.2989	122.236	0.667634	0.150505	4.43596	9.16634e-06	0.000383884
chr8L:107612098-107636645	NM_001094691	hdgf.L	18067.8	16243.6	16102.7	16153.2	19817.7	18524.3	21565.2	0.289995	0.0655042	4.42712	9.55005e-06	0.000395936
chr8L:16023670-16069877	NM_001127736	arhgap36.L	488.306	393.48	422.989	408.704	591.469	527.18	586.016	0.423632	0.0956939	4.42695	9.55744e-06	0.000395936
chr4L:115123075-115170607	NM_001091114	tmem184b.L	599.086	537.235	480.303	512.293	697.749	676.661	690.277	0.39246	0.0886923	4.42497	9.64573e-06	0.000397445
chr3L:41098408-41101746	NM_001090393	egr1.L	188.686	221.794	255.892	235.429	165.196	124.378	129.427	-0.579085	0.131133	-4.41602	1.00536e-05	0.000412035
chr9_10L:29252571-29287131	NM_001092503	vat1.L	2063.53	2631.14	2099.61	2411.73	1772.1	1605.5	1861.11	-0.402862	0.0913039	-4.41233	1.02266e-05	0.000416897
chr9_10L:106565935-106575049	NM_001091567	eci1.L	1021.94	1228.9	1121.25	1177.14	805.184	827.284	971.9	-0.396079	0.0898231	-4.40954	1.03589e-05	0.000420055
chr4L:112938358-112943989	NM_001095279	tomm22.L	730.938	846.926	812.075	853.193	571.831	641.288	660.317	-0.384937	0.087578	-4.39537	1.10585e-05	0.000443728
chr1L:209548288-209570949	NM_001097067	smad4.1.L	2519.45	2082.4	2353.89	2222.45	2899.59	2643.89	2914.5	0.323578	0.0736019	4.39633	1.10095e-05	0.000443728
chr6S:18482202-18595080	NM_001093072	arhgap21.S	1478.09	1297.91	1325.47	1281.67	1773.25	1572.41	1617.84	0.324288	0.0738472	4.39133	1.12658e-05	0.000449692
chr1L:96744488-96747602	NM_001086600	cirbp.L	157243	177877	174440	175304	127086	134329	154419	-0.322301	0.0734787	-4.38631	1.15289e-05	0.000457809
chr2S:64959006-65010138	NM_001087650	pum1.S	3804	3267.77	3519.53	3334.61	4208.44	3948.14	4545.52	0.308807	0.0706744	4.36944	1.24568e-05	0.000489597
chr7S:58811210-59045896	NM_001097127	rere.S	1208.62	1024.36	1089.76	1018.94	1409.36	1246.06	1463.24	0.362464	0.0829545	4.36943	1.24571e-05	0.000489597
chr5S:119696583-119824395	NM_001161388	rock2.S	276.992	231.652	208.266	227.895	346.564	325.208	322.369	0.484707	0.11098	4.3675	1.25674e-05	0.000491411
chr5S:19195995-19318164	NM_001096483	eml4.S	731.972	633.346	602.195	626.24	775.148	826.143	928.758	0.398383	0.0913037	4.36327	1.28132e-05	0.000495961
chr2L:81226240-81250277	NM_001096783	mtf1.L	188.405	117.469	159.025	133.723	202.162	255.602	262.449	0.591684	0.135574	4.36428	1.2754e-05	0.000495961
chr8L:79367346-79392028	NM_001089192	pcnx4.L	180.763	122.398	150.952	133.723	222.956	207.677	246.87	0.561792	0.129309	4.34457	1.39551e-05	0.000537448
chr5L:152780340-152838643	NM_001090449	fzd3.L	483.331	418.123	418.953	388.928	551.037	571.682	551.263	0.402448	0.0926922	4.34177	1.4134e-05	0.000541613
chr5L:16544743-16576304	NM_001086113	nvl.L	1294.91	1101.58	1160.8	1130.06	1420.91	1581.54	1374.56	0.341496	0.0787212	4.33805	1.43753e-05	0.000542721
chr2S:128741491-128743619	NM_001087546	hoxc6.S	642.212	469.054	602.195	517.001	795.942	718.881	750.196	0.445222	0.102629	4.33819	1.43663e-05	0.000542721
chr1L:37410032-37414168	NM_001098697	ankrd37.L	140.494	191.4	213.916	193.052	40.4325	86.7222	117.443	-0.662011	0.152581	-4.33874	1.43301e-05	0.000542721
chr6L:39022453-39029855	NM_001090483	cbx3.L	6338.3	6823.87	7051.98	6896.18	5718.31	5485.18	6054.3	-0.256985	0.059345	-4.33035	1.48871e-05	0.000559288
chr9_10L:3527412-3535064	NM_001090649	hoxb7.L	208.908	123.219	179.205	158.208	265.699	289.835	237.283	0.579268	0.134062	4.32089	1.55402e-05	0.000575362
chr9_10S:19079356-19084950	NM_001090807	sox9.S	548.674	469.054	454.472	453.906	687.352	570.541	656.721	0.420303	0.0972603	4.32142	1.55028e-05	0.000575362
chr2S:147141532-147161368	NM_001093141	fam76b.S	96.4144	55.8593	71.8436	55.5612	118.987	107.262	168.974	0.649216	0.150202	4.32228	1.54429e-05	0.000575362
chr3S:107677350-107715777	NM_001089848	hspa4.S	2237.92	2102.12	1927.67	1986.08	2533.38	2393.99	2484.28	0.28605	0.0662368	4.31859	1.5703e-05	0.000577555
chr9_10L:23605719-23610861	NM_001095845	alyref.L	20070.4	23405.9	22602.5	22830	16167.2	15373.8	20043.2	-0.37858	0.0876762	-4.31793	1.57501e-05	0.000577555
chr3L:60672411-60686505	NM_001089043	LOC398520	170.816	266.153	177.591	223.186	110.9	139.212	107.856	-0.612118	0.141869	-4.31466	1.59851e-05	0.00058338
chr3L:33197434-33223200	NM_001090839	tcerg1.L	1006.32	882.248	913.786	872.969	1117.09	1120.54	1131.29	0.315107	0.0731631	4.30692	1.65546e-05	0.000601302
chr9_10S:78593570-78623339	NM_001127810	usp7.S	812.163	577.487	703.099	663.909	978.466	806.744	1143.27	0.491089	0.11424	4.29874	1.71771e-05	0.000618055
chr8L:78536317-78573789	NM_001172184	hif-1a	1711.62	1570.63	1477.23	1532.17	1966.17	1810.9	1912.64	0.296167	0.0688953	4.2988	1.71723e-05	0.000618055
chr5S:46983308-46993839	NM_001095380	mpc1.S	1271.06	1464.66	1388.44	1381.5	1144.82	1122.82	1124.1	-0.302353	0.0703835	-4.29579	1.74074e-05	0.000623411
chr9_10L:106032460-106095376	NM_001095168	crebbp.L	1377.46	1203.44	1217.31	1213.87	1664.66	1514.21	1451.26	0.32623	0.0760107	4.29189	1.77155e-05	0.000631497
chr2L:87745754-87781159	NM_001137574	srrm1.L	6904.45	6099.34	6477.23	6190.83	7962.89	7434.14	7262.28	0.260619	0.0608009	4.28643	1.81566e-05	0.000644222
chr9_10S:8517653-8544962	NM_001088263	ncoa3.S	340.029	285.868	276.881	272.156	412.411	367.428	425.431	0.454459	0.106173	4.28037	1.86586e-05	0.000655962
chr6L:88914980-88921065	NM_001093793	tmem14c.L	479.93	610.345	519.05	596.105	332.701	443.881	377.495	-0.48427	0.113134	-4.2805	1.86477e-05	0.000655962
chr1L:79201865-79249733	NM_001166013	cenpc.L	524.463	448.517	435.098	433.189	564.899	676.661	588.413	0.419372	0.0981153	4.27428	1.91755e-05	0.000671057
chr7L:73818370-73839999	NM_001090252	ddx6.L	1852.67	1553.38	1728.28	1623.52	2116.35	1940.98	2153.52	0.318554	0.0746062	4.26981	1.95642e-05	0.000681546
chr4L:11679135-11694866	NM_001086638	fnbp4.L	1553.4	1224.8	1387.63	1333.47	1940.76	1543.88	1889.87	0.398866	0.0936205	4.26046	2.04009e-05	0.000707477
chr1S:60749156-60784919	NM_001091466	MGC81379	599.655	670.312	717.629	683.685	497.897	473.549	554.858	-0.395482	0.0932206	-4.24243	2.21109e-05	0.000763324
chr1L:103043608-103060359	NM_001097761	bsg.L	5684.51	6479.68	6341.61	6261.46	4787.2	4644.2	5592.92	-0.322203	0.0760301	-4.23783	2.2569e-05	0.000775644
chr8S:12617814-12633125	NM_001097762	pkdcc.1.S	499.165	609.524	573.135	586.688	442.447	440.457	342.741	-0.452937	0.107043	-4.23136	2.32283e-05	0.000794738
chr6L:48139270-48162202	NM_001092175	cmtm8.L	1812.51	1881.97	2223.12	2068.01	1702.78	1486.83	1512.38	-0.35944	0.0850196	-4.22773	2.3606e-05	0.000804073
chr8L:97863589-97896459	NM_001091798	mpp5.L	276.148	236.581	213.916	219.42	333.857	310.374	342.741	0.470121	0.11143	4.21897	2.4542e-05	0.000828591
chr7S:3871452-3901648	NM_001172060	a2m.S	19990.7	18092.7	18216	18038.5	22745	22618.5	20233.7	0.259914	0.0616059	4.21897	2.45419e-05	0.000828591
chr9_10L:5042328-5066261	NM_001087209	grn.L	4216.01	6511.72	3770.58	5172.84	3076.33	3228.12	3536.47	-0.518524	0.122973	-4.21655	2.48065e-05	0.000833846
chr9_10L:18448487-18454173	NM_001086235	MGC52622	593.67	724.528	675.653	679.918	423.963	529.462	528.493	-0.427554	0.101492	-4.21269	2.52349e-05	0.000841602
chr7L:27287115-27293686	NM_001093432	exosc1.L	1221.68	1343.91	1359.38	1379.61	1023.52	1133.09	1090.54	-0.309821	0.0735482	-4.21249	2.52568e-05	0.000841602
chr3L:118862382-118906180	NM_001094133	zmiz2.S	3299.9	2773.25	3114.3	2890.12	3679.35	3439.22	3903.18	0.30806	0.0733656	4.19897	2.6813e-05	0.00088959
chr1L:112097202-112102636	NM_001095023	thap1.L	896.278	977.538	1045.37	998.218	810.96	794.193	751.395	-0.332284	0.0792832	-4.1911	2.77606e-05	0.000917058
chr5L:113345405-113349542	NM_001086847	ssr3.L	1132.28	1230.55	1293.99	1264.72	953.051	1007.57	1043.8	-0.313514	0.0748249	-4.18997	2.78993e-05	0.000917683
chr2S:126002680-126031580	NM_001127801	larp4.S	473.364	422.231	370.519	376.686	490.966	585.375	594.405	0.442485	0.105754	4.18408	2.86323e-05	0.00093777
chr3L:55073371-55084541	NM_001093606	slc38a2.L	1696.25	1438.38	1507.91	1519.93	1764.01	1865.67	2081.62	0.329243	0.0788195	4.17717	2.95152e-05	0.000958494
chr3L:130294781-130301915	NM_001095677	p2ry11.L	330.875	254.653	293.025	255.205	373.134	375.416	433.82	0.467812	0.111971	4.17797	2.94123e-05	0.000958494
chr6L:35118781-35191476	NM_001088283	igf2bp3.L	4060.59	3538.03	3801.25	3571.92	4541.14	4177.5	4733.67	0.285824	0.0684702	4.17443	2.98733e-05	0.000966029
chr4S:80734172-80749765	NM_001093499	uap1.S	1078.06	1295.44	1135.78	1246.83	961.137	850.106	979.09	-0.36293	0.0871193	-4.16589	3.10134e-05	0.000998685
chr9_10S:27132859-27138011	NM_001086692	snrpn	7046.95	7761.16	7629.15	7571.39	6233.53	6298.77	6787.72	-0.240004	0.0576812	-4.16086	3.17052e-05	0.00101669
chr1L:9452210-9455277	NM_001088150	foxi4.2.S	540.51	575.844	764.449	634.716	370.823	389.109	508.12	-0.510107	0.122781	-4.15463	3.25819e-05	0.00103613
chr3L:47478834-47484050	NM_001089787	dusp6.L	560.932	749.172	570.713	670.501	442.447	492.947	439.812	-0.45295	0.109016	-4.15491	3.25415e-05	0.00103613
chr9_10L:67451187-67459020	NM_001087849	LOC397772	1853.18	2056.94	2058.44	2011.5	1752.46	1589.53	1650.19	-0.28039	0.0675254	-4.15236	3.29057e-05	0.00103782
chr2S:43399069-43446595	NM_001135061	hipk1.S	342.032	276.011	290.603	283.456	374.289	410.789	417.042	0.432556	0.104149	4.15324	3.27807e-05	0.00103782
chr2L:10078110-10120569	NM_001087146	bace2.L	479.319	418.945	406.845	371.036	519.846	540.873	618.373	0.424167	0.102372	4.14341	3.42186e-05	0.0010748
chr2L:149240538-149261132	NM_001099905	sp7.L	746.629	680.991	619.954	644.133	806.339	853.529	874.83	0.349906	0.0845423	4.13883	3.49085e-05	0.001092
chr9_10L:100798820-100835935	NM_001091761	polr3e.L	906.184	759.029	839.521	766.556	991.173	993.882	1086.95	0.34583	0.083651	4.13421	3.56184e-05	0.00110967
chr4S:73305513-73312268	NM_001094415	MGC83272	958.724	1036.68	1109.94	1082.03	797.097	840.977	885.615	-0.329428	0.0797374	-4.13141	3.60541e-05	0.00111478
chr1L:209548217-209571200	NM_001096792	MGC79910	2880.49	2409.34	2736.52	2568.06	3291.2	3040.98	3236.87	0.293031	0.0709295	4.13129	3.60732e-05	0.00111478
chr8L:16093826-16109825	NM_001094358	brcc3.L	426.713	464.125	518.243	512.293	339.633	338.901	387.082	-0.424625	0.102822	-4.12971	3.63228e-05	0.00111798
chr2S:63461290-63486903	NM_001088084	slc9a1.S	210.992	176.614	167.904	157.266	259.923	244.191	260.052	0.491716	0.119227	4.12419	3.72036e-05	0.00114051
chr1L:13223411-13251154	NM_001094321	nelfa.L	291.96	243.152	218.76	253.321	336.167	348.03	352.329	0.453951	0.110204	4.11918	3.80224e-05	0.00116097
chr7S:5866870-5905070	NM_001091141	sgms1.S	899.254	709.742	843.557	744.896	1051.24	945.956	1100.13	0.384768	0.0936146	4.11013	3.95444e-05	0.00120265
chr7S:73095745-73127643	NM_001093523	cnot3.S	2939.29	2728.07	2600.09	2665.99	3313.15	3274.9	3053.52	0.258397	0.0630398	4.09896	4.15019e-05	0.0012572
chr9_10S:93840214-93849321	NM_001087319	plk1.S	4943.65	4513.92	4350.98	4486.33	5869.64	5141.71	5299.31	0.274261	0.0669554	4.09617	4.20034e-05	0.00126738
chr1S:111763219-111767130	NM_001171969	cr1b	91.9209	132.255	103.326	127.131	65.8472	57.0541	65.9118	-0.599595	0.14649	-4.09307	4.25702e-05	0.00127944
chr9_10L:12149405-12157830	NM_001088819	znf217.L	2769.69	2308.3	2656.6	2460.7	3121.39	3100.32	2970.83	0.290261	0.0710167	4.08722	4.36564e-05	0.00130696
chr5L:152493375-152545392	NM_001093630	hmbox1.S	243.94	213.58	179.205	182.693	316.528	262.449	309.186	0.499602	0.122281	4.08569	4.39451e-05	0.00131049
chr9_10S:76127999-76144358	NM_001095477	mob4.S	1379.93	1472.88	1659.67	1547.24	1156.37	1123.97	1319.43	-0.346848	0.0850266	-4.07929	4.5174e-05	0.00134191
chr3S:88846315-88849834	NM_001087432	snrpf.S	2215.71	2521.88	2366	2412.67	1946.53	1952.39	2094.8	-0.270589	0.0663793	-4.07641	4.57366e-05	0.00135338
chr4S:2785793-2793801	NM_001088245	spdyc.S	505.665	616.095	549.725	581.038	453.999	424.482	408.653	-0.391201	0.0960824	-4.07152	4.67079e-05	0.0013768
chr7L:90317344-90320524	NM_001112851	LOC728026.L	30981.7	34735.5	33059.4	33770.8	28481.8	26103.4	29739.4	-0.25645	0.063001	-4.07057	4.68978e-05	0.00137711
chr3L:125059313-125113613	NM_001085604	adam9.L	170.309	143.756	117.049	127.131	228.732	188.278	216.91	0.533961	0.131447	4.06219	4.86151e-05	0.00142208
chr3S:53602663-53636797	NM_001096742	rnf111-b	1086.61	942.215	937.196	925.706	1367.77	1090.87	1255.92	0.365913	0.0901004	4.06117	4.88279e-05	0.00142288
chr2L:139038647-139051485	NM_001097138	pan2.L	85.3155	59.1451	57.3135	62.1532	102.814	111.826	118.641	0.587842	0.145269	4.04656	5.19751e-05	0.00150885
chr9_10S:5493756-5524845	NM_001092099	cdc27.S	1091.78	968.502	918.63	953.957	1246.48	1352.18	1110.91	0.351028	0.0868803	4.04036	5.33691e-05	0.00154347
chr4L:9362926-9391656	NM_001096408	large1.L	484.215	582.415	527.122	557.495	418.187	422.2	397.868	-0.382311	0.0947329	-4.03567	5.44457e-05	0.00156869
chr3S:10455035-10502950	NM_001094571	clint1.S	2419.76	2273.8	2096.38	2216.8	2688.18	2640.46	2602.92	0.256013	0.0634807	4.03292	5.5088e-05	0.00158125
chr8L:76346035-76349840	NM_001086166	znf238.2.L	131.652	112.54	78.3015	93.2298	160.575	188.278	156.99	0.570876	0.141716	4.0283	5.61817e-05	0.00159591
chr5L:152493375-152545476	NM_001093483	hmbox1.L	243.694	213.58	180.013	182.693	316.528	260.167	309.186	0.494063	0.122621	4.02919	5.59691e-05	0.00159591
chr6L:110955595-111109164	NM_001172236	cdh2.L	590.855	496.984	524.701	508.526	644.609	657.263	713.046	0.359244	0.0891839	4.02813	5.62234e-05	0.00159591
chr9_10S:92465125-92494564	NM_001094720	rab40c.L	620.25	516.699	562.641	534.894	708.146	680.084	719.038	0.350008	0.0869398	4.02587	5.67659e-05	0.00160536
chr1S:134519088-134562172	NM_001091295	mlxip.L	175.211	135.541	134	138.432	229.887	191.702	221.703	0.510884	0.126961	4.02394	5.72323e-05	0.0016126
chr3L:117297085-117314255	NM_001097841	stard7.L	1244.43	1048.18	1141.43	1098.98	1303.08	1384.13	1490.81	0.319811	0.0796119	4.01712	5.89129e-05	0.00165388
chr3S:6906420-6914976	NM_001087383	ldhb.S	2579.34	3324.45	2538.74	2962.63	2149.85	2187.45	2312.91	-0.367498	0.0915996	-4.012	6.02059e-05	0.00168178
chr3L:24516919-24522338	NM_001088168	wnt8a.L	884.619	952.073	1071.2	1024.59	722.008	685.79	852.06	-0.384226	0.0957823	-4.01145	6.03458e-05	0.00168178
chr9_10S:66958842-66981790	NM_001091203	sh3bp4.S	2427.99	2288.59	1959.15	2159.35	2592.3	2632.47	2936.07	0.322791	0.0805155	4.00905	6.09623e-05	0.00169281
chr6L:103230251-103253506	NM_001114798	impa2.L	1221.64	1730.82	1148.69	1482.26	951.896	1064.63	951.527	-0.460183	0.114967	-4.00275	6.26114e-05	0.00173232
chr3L:45230031-45233064	NM_001101779	myf5.L	1548.12	1292.98	1423.15	1317.46	1800.98	1901.04	1553.12	0.347683	0.0870566	3.99376	6.50331e-05	0.00179285
chr8S:22033371-22059792	NM_001127824	zc3h14.S	582.676	526.556	491.604	484.983	698.904	673.238	620.77	0.365956	0.0917236	3.98978	6.61358e-05	0.00181672
chr4S:52284329-52288759	NM_001091901	gng5.S	3138.33	3396.74	3471.9	3429.72	2663.92	2880.09	2987.6	-0.258751	0.0649084	-3.98639	6.70848e-05	0.00183621
chr2S:120659369-120674720	NM_001092532	pan2.S	358.162	320.37	263.158	299.465	417.032	395.955	452.994	0.43942	0.110434	3.97902	6.92001e-05	0.00188737
chr4L:87184545-87188725	NM_001086255	magoh.L	3517.06	3883.86	3735.87	3831.84	3172.22	3124.28	3354.31	-0.237102	0.059629	-3.97628	7.00016e-05	0.00190245
chr6L:31409189-31414368	NM_001090564	dlx5.L	899.048	952.073	1080.88	1022.7	753.199	740.562	844.87	-0.35068	0.0882469	-3.97385	7.0721e-05	0.00191521
chr5L:158819567-158831915	NM_001095622	krtcap3.L	2218.97	2637.71	2430.58	2504.02	1885.31	1675.11	2181.08	-0.360442	0.0907576	-3.97149	7.1426e-05	0.00192749
chr8L:89498782-89503705	NM_001086591	actc1.L	3036.23	2774.07	2635.61	2687.65	3384.77	3668.58	3066.7	0.300605	0.0758195	3.96474	7.3476e-05	0.00196215
chr8L:109552129-109562670	NM_001092754	rab25.L	1268.42	1082.68	1150.31	1082.97	1559.54	1282.58	1452.46	0.340501	0.0858727	3.96519	7.33379e-05	0.00196215
chr3S:6906502-6911311	NM_001171980	ldhc	2521.75	3241.48	2486.27	2887.3	2092.09	2146.37	2276.95	-0.362802	0.0915073	-3.96473	7.34784e-05	0.00196215
chr8L:21374993-21384512	NM_001086874	p2ry4.L	372.632	300.654	326.929	316.416	428.584	422.2	441.01	0.396867	0.100192	3.96107	7.46138e-05	0.0019841
chr5S:109892455-109977329	NM_001091062	trip12.S	2274.97	2022.44	2036.65	2022.8	2711.29	2299.28	2557.38	0.295217	0.0745574	3.9596	7.50767e-05	0.0019841
chr9_10S:25801159-25819105	NM_001092419	dhx8.S	3742.99	3454.24	3497.74	3376.05	4161.08	3994.93	3973.88	0.223661	0.0564822	3.95984	7.50003e-05	0.0019841
chr4L:38523220-38602616	NM_001089651	bcar1.L	342.042	310.512	244.591	284.398	422.808	401.661	388.281	0.44514	0.112558	3.95475	7.66159e-05	0.00201782
chr4S:3350484-3374262	NM_001087877	dpf2.S	412.21	331.87	356.796	333.367	437.826	462.138	551.263	0.429672	0.108721	3.95206	7.74813e-05	0.00203362
chr9_10S:63351-72548	NM_001086508	asxl1.S	4747.37	4032.55	4510.81	4308.34	5220.41	4953.43	5458.7	0.267831	0.0678006	3.95028	7.80603e-05	0.00204182
chr3L:143879472-143881383	NM_001091061	gabarap.L	866.803	1032.58	916.208	976.558	722.008	780.5	772.966	-0.33234	0.0841889	-3.94755	7.89542e-05	0.00205818
chr2L:57932775-57934831	NM_001086066	id3.L	7974.49	8205.57	9450.26	8746.65	7317.12	7430.72	6696.64	-0.282497	0.0716448	-3.94302	8.04607e-05	0.00207729
chr4S:81861784-81886973	NM_001095955	slc30a7.S	1680.59	1536.95	1526.48	1496.38	1777.87	1915.88	1829.95	0.262694	0.0666244	3.94291	8.05005e-05	0.00207729
chr6L:130240684-130290255	NM_001096248	nipal2.L	2082.76	1706.99	1868.74	1783.61	2282.7	2103.01	2751.52	0.369584	0.093715	3.9437	8.02338e-05	0.00207729
chr2L:32795400-32835123	NM_001086829	flot2.L	1015.97	857.605	920.244	856.96	1189.87	1022.41	1248.73	0.355009	0.0901653	3.93731	8.23991e-05	0.00211915
chr1L:107516298-107536747	NM_001097023	clta.L	4351.19	4868.8	4593.15	4631.35	4035.16	3941.29	4037.4	-0.222229	0.0564656	-3.93565	8.29709e-05	0.00212672
chr9_10L:83160157-83197909	NM_001093095	wdr75.L	1900.01	1591.99	1792.05	1722.4	2141.77	2134.96	2016.9	0.283825	0.0721355	3.93461	8.33321e-05	0.00212886
chr7L:43219531-43245072	NM_001097756	sgpl1.L	269.804	170.042	244.591	199.644	356.961	277.283	370.305	0.525511	0.133623	3.9328	8.39624e-05	0.00213783
chr3L:25579022-25581232	NM_001086898	foxi1.L	533.161	501.091	374.556	405.879	715.077	660.686	541.675	0.470741	0.119854	3.92761	8.5793e-05	0.00217721
chr6S:95520301-95553760	NM_001092453	mtfr1.S	75.7008	45.1803	58.9279	50.8526	105.124	95.8508	98.2685	0.582967	0.148507	3.92552	8.65412e-05	0.00218895
chr3S:88125378-88151061	NM_001086792	gns.S	1002.14	740.136	956.57	860.727	1162.14	1082.89	1210.38	0.383487	0.0979138	3.91658	8.98157e-05	0.00225684
chr7L:66513105-66659273	NM_001092225	arhgap32.L	489.636	391.837	417.339	419.063	616.884	601.35	491.343	0.412051	0.105228	3.91579	9.01087e-05	0.00225684
chr3L:15194970-15239535	NM_001095894	larp1.L	4106.3	3548.71	3544.55	3439.14	4583.89	4002.91	5518.62	0.374746	0.0957001	3.91583	9.00926e-05	0.00225684
chr7S:53606308-53702152	NM_001089294	arhgef12.S	173.386	123.219	143.687	139.374	210.249	199.689	224.1	0.498291	0.127278	3.91498	9.04129e-05	0.00225708
chr9_10L:31128114-31133619	NM_001096353	snrpb.L	11684.3	13062.9	12186	12514.4	10470.9	10811.7	11060	-0.216006	0.0552187	-3.91183	9.15976e-05	0.00227923
chr3L:93518308-93564879	NM_001095664	sema6d.L	1497.3	1329.94	1342.43	1312.75	1777.87	1703.63	1517.17	0.304152	0.0779246	3.90316	9.49443e-05	0.00235487
chr2L:141521049-141604262	NM_001095964	r3hdm2.L	1563.37	1450.7	1375.52	1385.26	1802.13	1735.58	1631.02	0.27841	0.0713555	3.90173	9.55091e-05	0.00236123
chr5L:105105625-105177418	NM_001092672	MGC84000	269.485	202.901	222.796	224.128	288.803	310.374	367.908	0.465092	0.119526	3.89113	9.97788e-05	0.00245886
chr2S:6623591-6744479	NM_001088756	ncor1.S	1668.03	1435.09	1524.05	1462.48	1806.75	2050.52	1729.29	0.312279	0.08032	3.88794	0.000101099	0.00248342
chr1S:154619028-154638411	NM_001088474	ocln.S	1389.38	1322.55	1085.73	1224.23	1550.3	1493.68	1659.78	0.339322	0.0873759	3.88347	0.000102975	0.00250885
chr6L:55451850-55462842	NM_001090584	psma2.L	1229.14	1394.02	1313.37	1350.42	1093.99	1120.54	1102.53	-0.274253	0.0706265	-3.88314	0.000103117	0.00250885
chr5S:22631734-22638039	NM_001093506	epcam.S	12119.5	13076	13476.7	13169.9	10591	10459.2	11944.4	-0.254812	0.0655946	-3.88465	0.000102479	0.00250885
chr9_10S:90116117-90135853	NM_001090755	rac3.S	1563.67	1323.37	1381.17	1388.09	1725.89	1584.96	1978.55	0.337048	0.0868693	3.87994	0.000104483	0.00253404
chr1S:13251844-13324753	NM_001087641	add1.S	1584.63	1357.87	1430.41	1413.51	1721.27	1639.73	1945	0.311275	0.0802789	3.87742	0.000105571	0.00255235
chr6S:32664342-32667107	NM_001092632	cycs.S	3019.27	3521.6	3175.65	3332.73	2600.39	2930.3	2554.98	-0.290587	0.0752002	-3.86418	0.000111461	0.00268627
chr5L:17331483-17334323	NM_001088291	mixer.L	389.001	386.908	562.641	456.732	328.081	301.245	298.401	-0.476252	0.123579	-3.85382	0.000116289	0.00279384
chr5S:12213383-12220670	NM_001085906	h3f3c.L	7672.16	8378.07	8446.87	8391.62	6520.02	6714.12	7582.26	-0.262177	0.0681779	-3.84548	0.000120316	0.002873
chr3L:136452169-136454361	NM_001088706	hes7.1.L	471.768	519.163	563.448	539.602	435.515	383.403	389.479	-0.37565	0.097687	-3.84545	0.000120333	0.002873
chr8S:32459426-32485827	NM_001094147	golga2.S	750.274	565.986	649.014	624.357	827.133	755.396	1079.76	0.441938	0.114956	3.8444	0.000120847	0.00287631
chr9_10L:7779569-7821617	NM_001092875	slc13a3.L	1418.16	1020.25	1371.49	1155.48	1885.31	1548.45	1527.96	0.413577	0.107691	3.84042	0.000122822	0.00290526
chr5S:12213371-12220665	NM_001098432	h3f3a.L	7671.51	8376.43	8446.87	8391.62	6517.71	6712.98	7583.45	-0.262195	0.0682675	-3.8407	0.000122684	0.00290526
chr4L:90298630-90348275	NM_001092910	smg7.L	812.173	742.6	688.569	727.945	924.171	895.749	894.004	0.305909	0.0797614	3.8353	0.000125411	0.00295706
chr9_10L:7779709-7821622	NM_001092954	xnadc-3	1417.69	1018.61	1371.49	1155.48	1885.31	1547.31	1527.96	0.413598	0.10786	3.83457	0.000125783	0.00295706
chr2S:65424844-65465826	NM_001103187	thrap3.S	5084.58	4453.96	4698.9	4581.44	5568.13	5153.12	6051.9	0.271781	0.0709068	3.83293	0.000126624	0.00296773
chr7L:7888004-7914269	NM_001087035	chd4.L	25938.2	23952.1	24103.1	23841.4	27833.7	26588.3	29310.4	0.212336	0.0554305	3.83067	0.000127793	0.00298598
chr7L:114771216-114799629	NM_001087242	xrcc1.L	2004.1	1779.28	1839.68	1826.93	2065.52	2242.22	2270.96	0.258546	0.0675399	3.82805	0.000129163	0.00300884
chr9_10S:40353126-40382751	NM_001130944	suz12.S	4045.47	3690	3793.99	3744.26	4448.73	4323.56	4272.28	0.209162	0.0546943	3.82421	0.000131193	0.00304687
chr3L:81853857-81874571	NM_001091287	tm7	2569.79	2959.72	2667.9	2811.02	2248.05	2322.1	2409.98	-0.259523	0.0679124	-3.82144	0.000132676	0.003072
chr4S:65645540-65648544	NM_001086359	klf4.L	1239.58	1331.59	1479.66	1381.5	1068.57	980.189	1196	-0.336303	0.0881297	-3.81601	0.000135629	0.00313091
chr4S:64363799-64375491	NM_001088068	nasp.S	2012.01	2221.23	2274.78	2222.45	1725.89	1643.16	1984.55	-0.303819	0.0797388	-3.81017	0.000138869	0.00319607
chr5L:10302542-10316123	NM_001097815	diexf.L	1659.78	1453.16	1532.93	1511.45	1878.38	1726.46	1856.32	0.264658	0.0695244	3.80669	0.000140841	0.00323174
chr3L:130764047-130810347	NM_001092194	tyk2.L	795.206	656.347	734.581	702.519	847.927	932.263	897.599	0.324844	0.0853752	3.8049	0.000141861	0.00323578
chr5S:106795456-106822523	NM_001096460	farp2.L	334.163	291.618	251.049	279.689	445.912	364.005	372.701	0.435837	0.114534	3.80531	0.000141627	0.00323578
chr9_10L:7621550-7900701	NM_001087714	itgb3.L	62.0034	33.6799	47.6267	41.4354	83.1754	81.0168	85.0862	0.575626	0.151359	3.80305	0.000142923	0.00325034
chr9_10L:104797656-104804546	NM_001096645	rnps1.L	2449.55	2132.51	2296.57	2191.37	2732.08	2506.96	2837.8	0.27013	0.0711514	3.79655	0.000146725	0.00332693
chr1S:83753566-83812127	NM_001086940	tcfe2a	5717.49	4715.18	5355.98	5106.92	6166.53	5875.43	7084.92	0.308023	0.0811644	3.79505	0.000147611	0.0033345
chr1L:140969414-140982404	NM_001091508	tox4.L	1263.27	1197.69	1093.8	1105.57	1416.29	1352.18	1414.11	0.280997	0.0740534	3.79452	0.000147929	0.0033345
chr8L:4533585-4539608	NM_001091104	ppp1r26.L	687.48	452.625	662.737	565.029	864.1	840.977	739.411	0.443997	0.117065	3.79273	0.000148999	0.00334832
chr8S:422558-433709	NM_001127768	ptpn18.S	446.86	520.806	536.809	530.185	325.77	321.785	445.804	-0.443027	0.116831	-3.79204	0.000149416	0.00334832
chr4L:23262485-23273662	NM_001094911	cdca5.L	1620.17	1440.84	1534.55	1419.16	1725.89	1777.8	1822.76	0.261988	0.0691458	3.78892	0.000151301	0.00338068
chr3S:800648-917808	NM_001174037	sox5.S	384.15	319.548	335.001	326.775	419.342	464.42	439.812	0.378882	0.100047	3.78705	0.000152447	0.00339637
chr6L:14611159-14662284	NM_001092993	ncapg2.L	1049.66	931.536	900.871	913.463	1147.13	1078.32	1326.63	0.336259	0.0889846	3.77884	0.000157559	0.00350009
chr6L:49548440-49563812	NM_001091910	MGC83242	486.328	543.807	565.87	545.253	410.101	411.93	441.01	-0.350243	0.0927301	-3.77701	0.000158719	0.00351568
chr8L:81839158-81879413	NM_001087238	ehd4.L	975.727	899.499	863.738	838.126	1113.63	1021.27	1118.1	0.29856	0.0792025	3.76958	0.000163525	0.00361169
chr1S:87482041-87489959	NM_001096478	anp32c.S	35212	38243.9	38142.5	38066.9	31964.8	30291.1	34563	-0.231229	0.061405	-3.76564	0.000166126	0.00365859
chr3S:22900248-22940587	NM_001090275	bmp1.S	347.72	277.654	297.869	306.057	406.635	382.262	415.844	0.390825	0.10386	3.76299	0.000167891	0.00367738
chr2S:42004410-42029073	NM_001092418	MGC80993	150.008	102.683	116.241	121.481	220.646	170.021	168.974	0.516494	0.137259	3.76292	0.000167939	0.00367738
chr5L:30747336-30758304	NM_001355453	mdh1.L	2458.15	2774.07	2589.6	2655.64	2167.18	2311.83	2250.59	-0.24125	0.0641549	-3.76043	0.000169624	0.00369318
chr5L:30747336-30758304	NM_001355454	mdh1.L	2458.15	2774.07	2589.6	2655.64	2167.18	2311.83	2250.59	-0.24125	0.0641549	-3.76043	0.000169624	0.00369318
chr4L:119805395-119811275	NM_001096729	fam212a.L	459.673	517.52	534.387	521.71	377.755	378.839	427.828	-0.36386	0.0969032	-3.75488	0.000173425	0.00376523
chr8S:15805361-15832204	NM_001256285	mis18bp1b	148.835	133.898	74.2653	110.181	184.834	207.677	182.156	0.54844	0.146247	3.75008	0.000176778	0.00382718
chr4S:14156184-14182190	NM_001093040	arhgap1.S	350.601	317.084	271.23	287.223	397.393	449.586	381.09	0.412797	0.110487	3.73617	0.000186847	0.00403379
chr5S:131643203-131687308	NM_001092379	MGC80904	1063.09	984.11	867.774	941.715	1208.35	1284.86	1091.74	0.327596	0.087725	3.73435	0.000188198	0.00405155
chr1L:17280511-17288013	NM_001096018	grpel1.L	1335.87	1455.63	1438.49	1486.97	1216.44	1182.16	1235.55	-0.255293	0.068385	-3.73317	0.000189086	0.00405926
chr2S:156941495-156964129	NM_001086250	cdk4.L	4328.88	3569.25	4045.85	3766.86	4746.77	4347.52	5497.05	0.325981	0.0873954	3.72996	0.00019151	0.00409353
chr9_10S:28437080-28457706	NM_001088381	mybl2.S	2333.75	2088.97	2165.8	2117.92	2670.85	2409.96	2548.99	0.246826	0.0661857	3.7293	0.000192016	0.00409353
chr9_10S:103679950-103694195	NM_001092435	MGC82715	288.336	381.979	301.097	348.434	213.714	225.934	258.854	-0.452064	0.121254	-3.72824	0.000192819	0.00409353
chr6L:22456019-22468422	NM_001095267	enkur.L	187.067	165.935	126.735	144.082	255.302	212.241	218.108	0.490491	0.131548	3.72862	0.000192535	0.00409353
chr7L:46905370-46922403	NM_001094392	fam213a.L	732.405	846.926	808.039	793.865	631.902	662.968	650.729	-0.306102	0.082146	-3.72631	0.000194303	0.0041023
chr7S:25203532-25210180	NM_001199796	pcdh8l.S	1130.55	993.967	1009.04	1009.52	1363.15	1239.21	1168.44	0.299826	0.0804503	3.72685	0.000193889	0.0041023
chr9_10L:114679112-114682432	NM_001093287	cldn6.1.L	1328.06	1548.45	1488.54	1471.9	995.794	1173.03	1290.67	-0.343675	0.0922714	-3.72462	0.000195613	0.00410733
chr4L:82674232-82682841	NM_001095473	tspan1.L	1486.29	1629.78	1722.63	1653.65	1282.29	1167.33	1462.04	-0.324482	0.0871058	-3.72515	0.000195201	0.00410733
chr5L:150995225-151019926	NM_001088641	tram2.L	296.461	257.939	245.398	243.904	356.961	336.619	337.948	0.398215	0.10699	3.72197	0.000197675	0.00413929
chr5L:17168200-17171283	NM_001085745	lefty.L	269.929	297.369	339.037	323.95	211.404	198.548	249.267	-0.442181	0.118872	-3.71981	0.000199369	0.00415289
chr6L:98559358-98617493	NM_001172466	tshz1.L	84.0449	56.6808	58.9279	61.2115	87.7962	119.814	119.84	0.551094	0.148153	3.71977	0.000199408	0.00415289
chr5L:53388377-53456821	NM_001095790	scaf8.L	1559.84	1365.27	1486.11	1389.03	1727.04	1691.08	1700.53	0.256663	0.0690168	3.71885	0.000200135	0.00415672
chr2L:178192767-178203561	NM_001100939	rps3.L	4113.6	4961.62	4149.98	4584.27	3459.86	3627.5	3898.38	-0.29494	0.0794007	-3.71458	0.000203542	0.00421607
chr4S:51794638-51797543	NM_001086439	cyr61.S	80.8822	133.898	83.9521	106.414	47.3637	51.3487	62.3166	-0.562677	0.151512	-3.71374	0.00020422	0.00421871
chr8L:2476061-2481729	NM_001089079	glul.L	32521.3	38530.6	32550	35719.2	29066.3	28822.6	30439.3	-0.258851	0.0697212	-3.71266	0.000205095	0.0042254
chr5L:68850197-68863230	NM_001093811	dynlt1.L	675.964	825.568	705.521	781.623	526.777	621.889	594.405	-0.360801	0.0974289	-3.70322	0.000212881	0.00437404
chr8L:36729692-36731846	NM_001087116	hmgb3.L	43030.3	45216.5	47016.4	45819.1	38856.8	39553.3	41719.8	-0.194492	0.0525984	-3.69769	0.000217572	0.00443995
chr8S:37403621-37443307	NM_001092117	fam129b.S	1204.1	1168.12	896.835	1054.72	1318.1	1372.72	1414.11	0.352698	0.0953911	3.69739	0.000217826	0.00443995
chr7S:87309434-87314847	NM_001093058	tmem147.S	478.57	574.201	522.279	552.787	374.289	393.673	454.192	-0.377362	0.102048	-3.69788	0.000217409	0.00443995
chr2S:124907450-124943274	NM_001090493	lsf	1043.71	951.251	938.811	932.298	1112.47	1166.19	1161.25	0.268114	0.0726836	3.68878	0.000225336	0.00458084
chr9_10L:50389409-50433397	NM_001092950	myo10.2.S	230.891	171.685	180.013	190.226	249.526	248.756	345.138	0.482527	0.131051	3.68197	0.000231441	0.00469249
chr5S:22485130-22497237	NM_001087395	calm2.S	4784.89	5084.02	5328.54	5180.37	4678.61	4177.5	4260.3	-0.237805	0.0646083	-3.68071	0.000232583	0.0047022
chr4L:120718572-120732405	NM_001096772	ifrd2.L	2591.18	2267.23	2375.68	2281.77	3173.37	2602.81	2846.19	0.293034	0.0796266	3.6801	0.000233147	0.0047022
chr8S:92057919-92076678	NM_001091753	hdgf.S	5204.02	5067.59	4382.46	4699.16	5911.23	5665.47	5498.24	0.256195	0.0698252	3.66909	0.000243418	0.00488476
chr2L:132651857-132668006	NM_001094760	elf1.L	1471.32	1186.19	1423.15	1273.2	1739.75	1671.68	1533.95	0.318161	0.0867153	3.66903	0.000243473	0.00488476
chr1L:107063995-107082819	NM_001088100	melk.L	1559.8	1384.98	1475.62	1363.6	1728.2	1778.95	1627.42	0.264597	0.0723255	3.65841	0.000253782	0.00507829
chr9_10L:58368345-58388560	NM_001127820	prpf40a.S	7476.04	6852.62	6924.43	6909.36	8510.46	7994.42	7664.95	0.215832	0.059058	3.65458	0.000257608	0.00514143
chr1L:129891006-129919574	NM_001086942	ostf1.L	1030.2	1127.04	1136.58	1129.12	907.998	926.558	953.924	-0.265992	0.0728166	-3.6529	0.000259295	0.00516165
chr5L:17316511-17318601	NM_001087625	mixl1.L	151.843	184.829	198.579	193.052	107.435	82.1579	145.006	-0.524678	0.143702	-3.65116	0.000261062	0.00518336
chr6L:119518195-119550695	NM_001095325	mtfr1.L	141.397	110.076	115.434	102.647	155.954	191.702	172.569	0.489607	0.134261	3.64668	0.000265648	0.00526079
chr7L:68696864-68732946	NM_001085961	slc37a2.L	917.735	1103.22	939.618	1044.36	835.219	817.014	766.974	-0.319446	0.0877248	-3.64146	0.000271096	0.0053543
chr6S:97287645-97317889	NM_001088639	LOC398230	3983.39	3736	3638.19	3745.2	4252.34	4277.91	4250.71	0.194654	0.0534643	3.64082	0.000271767	0.0053543
chr2S:33833707-33856287	NM_001086784	prpf8.S	15142.6	14208	14154.8	14173.7	16301.2	16409.9	15607.9	0.178992	0.0492841	3.63185	0.000281398	0.00552682
chr4L:105679393-105702523	NM_001095117	LOC495465	258.895	150.327	217.953	178.926	466.706	235.063	304.393	0.539508	0.14857	3.63133	0.000281966	0.00552682
chr7S:16870289-16873633	NM_001088485	ventx3.2.S	1624.91	1676.6	2021.31	1891.9	1448.64	1163.9	1547.13	-0.371347	0.102492	-3.62318	0.000291001	0.00568936
chr2L:157557530-157566687	NM_001087367	hmgb1.L	1976.13	2222.05	2101.22	2105.67	1827.55	1831.44	1768.83	-0.232888	0.064311	-3.62128	0.000293152	0.00571683
chr2L:137278832-137301607	NM_001087268	lmbr1l.L	1778.64	1637.99	1529.7	1615.04	1928.05	1830.29	2130.75	0.279507	0.0772198	3.61963	0.000295029	0.00573883
chr4S:43086719-43137009	NM_001096068	top1.2.S	392.294	490.412	422.182	480.274	385.841	289.835	285.218	-0.432956	0.119871	-3.61186	0.000304014	0.00589864
chr6S:82653626-82685656	NM_001093600	ppp4r1.S	3566.29	3322.81	3310.46	3295.06	3808.74	3735.9	3924.75	0.200889	0.0556991	3.60669	0.000310128	0.00597745
chr9_10L:40448475-40483441	NM_001093844	rab40b.L	267.551	300.654	320.471	313.591	236.819	215.664	218.108	-0.402673	0.111654	-3.60645	0.000310416	0.00597745
chr6L:34524730-34590713	NM_001171982	meox2.L	234.411	185.65	201.808	192.11	294.579	257.884	274.433	0.421229	0.116793	3.60664	0.000310189	0.00597745
chr1L:127656814-127676764	NM_001096850	tjp2.L	1228.25	1384.98	1311.75	1350.42	1075.5	1077.18	1169.64	-0.267025	0.0740977	-3.60369	0.000313727	0.00602608
chr8L:58450608-58484237	NM_001096395	MGC131041	659.285	588.166	552.954	547.136	694.283	698.342	874.83	0.36958	0.10268	3.59932	0.000319055	0.0061131
chr8S:43976597-44056322	NM_001093106	nt5dc2.S	1398.54	1279.84	1217.31	1285.44	1497.16	1637.45	1474.03	0.26734	0.0743348	3.59643	0.000322613	0.00616584
chr3L:8561926-8588421	NM_001087458	maml1.L	234.797	197.972	194.543	193.052	283.027	268.154	272.036	0.409193	0.113892	3.59282	0.000327113	0.0062363
chr9_10L:18793880-18796836	NM_001091112	socs3.L	198.778	316.262	230.868	278.748	194.076	116.39	56.3246	-0.547419	0.152467	-3.5904	0.000330171	0.00627898
chr8L:108715241-108731261	NM_001085780	crabp2.L	7448.25	6671.08	7103.64	6786.94	7669.46	7976.16	8482.25	0.22087	0.0615496	3.58848	0.000332605	0.00630962
chr8L:93819023-93827242	NM_001095563	LOC503674	820.66	736.028	732.967	726.062	964.603	901.454	862.846	0.289977	0.081386	3.56298	0.000366667	0.00693862
chr9_10S:61654318-61661879	NM_001087851	hnrnpa3.S	13848.5	14990	15163.9	14798.1	13107	11717.8	13314.2	-0.226401	0.063579	-3.56094	0.000369525	0.00697145
chr9_10L:101504738-101514324	NM_001093115	dcun1d3.L	342.962	365.55	410.881	409.646	280.717	282.988	307.988	-0.380627	0.106904	-3.56045	0.000370222	0.00697145
chr7S:4583497-4606472	NM_001087217	gnb3.S	1259.36	1113.9	1162.41	1128.17	1388.57	1462.87	1300.26	0.267783	0.0753202	3.55526	0.000377602	0.00705839
chr2L:42293162-42304979	NM_001093169	pdha1.L	2693.83	2995.87	2802.71	2909.9	2511.43	2463.59	2479.48	-0.215086	0.0604894	-3.55576	0.000376893	0.00705839
chr4L:99920836-99939407	NM_001096261	slc35a3.1.L	109.775	41.8945	102.518	48.9692	177.903	100.415	186.95	0.537673	0.15122	3.55557	0.000377157	0.00705839
chr3S:84775379-84798351	NM_001094200	csrp2.S	1259.34	1440.84	1374.72	1415.4	1054.71	1013.28	1257.12	-0.315464	0.088847	-3.55064	0.000384296	0.00716604
chr1L:57357444-57382324	NM_001097967	larp1b.L	1887.92	1699.6	1733.13	1745.94	2153.32	1978.63	2016.9	0.235502	0.0664532	3.54387	0.000394296	0.00733467
chr5S:90401236-90436307	NM_001096987	tbl1xr1.S	456.314	355.692	402.001	363.502	482.879	474.69	659.118	0.425724	0.120312	3.53849	0.000402425	0.00746776
chr9_10L:14978336-15018089	NM_001097799	taf4.L	438.858	363.907	374.556	368.21	516.38	432.47	577.627	0.391334	0.110616	3.53778	0.000403509	0.00746979
chr3L:10034113-10099100	NM_001091479	uhrf1bp1l.L	567.736	508.484	493.219	470.857	717.387	594.503	621.968	0.346816	0.0980604	3.53676	0.000405063	0.0074805
chr4L:15625470-15662827	NM_001086613	cd81.L	473.55	497.805	601.388	534.894	441.291	378.839	387.082	-0.375354	0.106273	-3.53198	0.000412456	0.00759871
chr1L:144254967-144256737	NM_001086195	MGC53823	895.752	794.352	743.461	796.691	1080.12	1087.45	872.433	0.339022	0.0961563	3.52574	0.000422294	0.00763587
chr9_10L:39488513-39493053	NM_001086959	adprm.L	625.697	527.378	556.183	531.127	815.581	650.416	673.499	0.355491	0.100719	3.52954	0.000416282	0.00763587
chr6L:22619996-22740164	NM_001090055	arhgap21.L	1371.92	1334.05	1114.79	1179.97	1658.89	1468.57	1475.23	0.31134	0.0883071	3.52565	0.000422441	0.00763587
chr3S:20301616-20372647	NM_001091821	brd4.S	4742.25	4483.53	4304.97	4323.41	5318.6	4827.91	5195.05	0.216885	0.0615162	3.52565	0.000422444	0.00763587
chr8L:65072889-65086223	NM_001092372	golga5.L	251.382	219.33	199.386	210.944	307.287	292.117	279.226	0.401077	0.113736	3.52639	0.000421269	0.00763587
chr2S:32265383-32275957	NM_001092602	eif1ax.S	7588.38	8123.42	8190.17	8051.66	6942.83	6831.65	7390.51	-0.19626	0.0556287	-3.52803	0.000418665	0.00763587
chr6L:154034960-154039611	NM_001094674	LOC494849	1951.08	1656.06	1905.07	1715.8	2189.13	2185.17	2055.25	0.26624	0.0755083	3.52597	0.000421939	0.00763587
chr4S:91481903-91545408	NM_001095322	atf6.S	131.174	92.825	118.663	88.5212	152.488	163.175	171.371	0.491109	0.139147	3.52942	0.000416475	0.00763587
chr6L:62535297-62571611	NM_001089093	anln.L	1135.71	1059.68	1021.15	1009.52	1269.58	1240.36	1213.98	0.25308	0.0718226	3.52369	0.000425589	0.00767462
chr6L:8693402-8705813	NM_001087532	myd88.L	599.775	730.278	649.822	670.501	484.034	480.395	583.619	-0.355553	0.100939	-3.52246	0.000427569	0.00769223
chr1L:99071915-99093044	NM_001094054	mllt1.L	391.791	278.475	366.483	298.524	453.999	394.814	558.453	0.44739	0.127042	3.52158	0.000428985	0.00769962
chr3S:62990073-63026028	NM_001093678	tnpo3.S	2635.12	2458.63	2357.92	2407.02	2672.01	2937.14	2978.02	0.236676	0.0672415	3.51979	0.000431892	0.0077337
chr5L:126519047-126542459	NM_001091672	cab39.L	1808.17	1527.09	1750.89	1634.82	1977.73	1952.39	2006.12	0.256286	0.0729769	3.51188	0.000444948	0.0079489
chr1L:179317503-179323628	NM_001090185	glrx.L	422.099	559.414	419.761	500.05	328.081	376.557	348.733	-0.404929	0.115345	-3.51058	0.000447133	0.00796937
chr7L:52843178-52855498	NM_001101781	post.L	11856.8	11274.5	10537.6	10922	13451.3	12957	11998.3	0.220386	0.0628373	3.50724	0.000452775	0.00805121
chr7S:16920571-16923476	NM_001172212	ventx1.1.S	1337.09	1443.31	1505.49	1482.26	1171.39	1110.27	1309.85	-0.280856	0.0801011	-3.50627	0.000454439	0.00806209
chr1L:163798903-163836389	NM_001096011	atxn2.L	1110.62	1028.47	950.919	1008.58	1167.92	1201.56	1306.25	0.277222	0.0791031	3.50456	0.000457357	0.00809512
chr3L:34714501-34719844	NM_001096724	pole4.L	211.565	262.046	234.097	253.321	168.661	164.316	186.95	-0.424286	0.121129	-3.50275	0.000460479	0.00813159
chr7S:22150196-22167171	NM_001096481	zdhhc16.S	776.916	615.274	741.039	683.685	911.463	884.338	825.695	0.324717	0.0927675	3.50034	0.000464673	0.00818679
chr8S:97539287-97545710	NM_001086146	chtop.S	3713.49	4251.88	3971.58	4068.21	3169.91	3092.33	3727.01	-0.277616	0.0793261	-3.49968	0.000465814	0.00818807
chr5L:16922433-17003681	NM_001092191	enah.L	984.461	913.464	841.136	904.988	1090.52	1058.92	1097.73	0.268705	0.0767952	3.49898	0.000467041	0.00819086
chr8S:39674024-39714884	NM_001097839	gapvd1.S	256.187	210.294	216.338	218.478	314.218	282.988	294.806	0.392313	0.112327	3.49259	0.000478369	0.00837036
chr1L:189494262-189518592	NM_001093609	papd4a	241.507	202.079	207.459	194.935	288.803	292.117	263.647	0.400335	0.114656	3.4916	0.000480132	0.00838208
chr4S:13920643-13932702	NM_001087887	mdk.S	2779.09	2495.6	2631.58	2561.46	3093.66	2892.64	2999.59	0.215288	0.0616993	3.48931	0.000484274	0.00841605
chr9_10L:5509473-5521176	NM_001089271	dbf4b.L	457.737	349.942	422.989	379.511	511.759	475.831	606.389	0.391821	0.112287	3.48945	0.000484015	0.00841605
chr9_10L:23087547-23127007	NM_001088714	lig3.L	1922.13	1714.39	1806.58	1740.29	2202.99	2076.77	1991.74	0.23981	0.0688433	3.48342	0.000495047	0.00855162
chr3S:2945574-2955581	NM_001092773	mkrn1.S	1324.16	1836.79	1235.87	1549.12	1066.26	1209.55	1047.4	-0.396373	0.113794	-3.48324	0.000495381	0.00855162
chr4L:72094876-72108648	NM_001094519	cth.L	3295.77	3657.14	3474.33	3561.56	2900.74	3206.44	2974.42	-0.224553	0.064467	-3.48322	0.000495423	0.00855162
chr1S:33854790-33879530	NM_001094974	trappc11.S	374.314	324.477	321.278	319.241	399.704	422.2	458.986	0.355648	0.102156	3.48143	0.00049874	0.00858953
chr4L:24527464-24536339	NM_001092111	prdx5.L	312.419	441.946	304.326	371.036	255.302	243.05	258.854	-0.438554	0.126113	-3.47748	0.000506159	0.00869777
chr7S:4546264-4554435	NM_001087007	tpi1.S	2073.1	2794.61	1951.89	2375.95	1692.39	1864.53	1759.25	-0.364225	0.104899	-3.47213	0.00051634	0.00885286
chr5L:128817281-128840061	NM_001089601	tf.L	746.785	547.914	595.737	583.863	879.117	1244.92	629.158	0.479464	0.138153	3.47054	0.00051941	0.00888563
chr4S:10233927-10265701	NM_001086218	slc13a4.S	645.434	579.951	550.532	553.728	705.835	665.25	817.307	0.334663	0.0965638	3.46572	0.000528811	0.00900725
chr3L:80954822-80969955	NM_001086534	znf592.L	1398.06	1133.62	1326.28	1265.66	1678.52	1474.28	1509.98	0.296105	0.0854545	3.46507	0.0005301	0.00900725
chr2S:130329109-130332738	NM_001088985	krt18.S	12827.1	13445.7	14098.3	13699.1	11489.8	11680.1	12549.6	-0.19981	0.0576636	-3.46509	0.000530045	0.00900725
chr8L:68966890-68986733	NM_001256286	mis18bp1a	1316.35	1191.94	1163.22	1183.74	1516.8	1530.19	1312.24	0.278556	0.0804029	3.4645	0.000531221	0.00900725
chr9_10L:1535165-1558058	NM_001089033	top2a.L	7672.5	6925.73	7194.05	7029.9	8619.05	8604.89	7661.35	0.223692	0.0645962	3.46293	0.000534329	0.00903996
chr4L:102251785-102278793	NM_001088975	slc25a24.L	469.227	363.085	405.23	374.802	636.523	423.341	612.381	0.432036	0.124788	3.46216	0.000535865	0.00904597
chr1S:89058134-89060667	NM_001093966	jund.S	130.415	140.47	175.169	169.509	103.969	110.685	82.6894	-0.487025	0.140852	-3.45771	0.000544793	0.00917647
chr6S:114428714-114435715	NM_001096838	med30.S	668.155	808.317	693.412	774.089	537.174	550.001	645.936	-0.345245	0.0999319	-3.4548	0.000550697	0.00925557
chr5L:92521207-92543731	NM_001093375	ptp4a1.L	1407.78	1516.42	1561.99	1500.15	1298.46	1282.58	1287.08	-0.231156	0.0669464	-3.45285	0.000554705	0.00930253
chr1S:114950617-114959030	NM_001088588	pabpn1.S	9289.89	10159	9958.82	9937.91	8204.32	8265.99	9213.27	-0.216798	0.0629109	-3.44611	0.000568723	0.0095168
chr4L:38308608-38348032	NM_001093912	mbtps1.L	2392.34	2178.51	2256.21	2219.62	2564.57	2552.6	2582.55	0.202355	0.058802	3.44129	0.000578953	0.00965386
chr3S:631109-635235	NM_001096316	golt1b.S	885.972	970.145	1028.41	983.15	715.077	739.421	879.623	-0.317811	0.0923584	-3.44106	0.000579433	0.00965386
chr2L:125972020-125975613	NM_001114812	LOC100490530.L	798.173	1238.76	688.569	974.675	621.505	691.495	574.032	-0.459923	0.133714	-3.43961	0.000582559	0.00968489
chr2L:147260246-147322463	NM_001087603	itga5.L	3134.44	2812.68	2943.97	2827.03	3247.3	3296.58	3679.08	0.238211	0.0692806	3.43835	0.000585279	0.00970904
chr1L:153543525-153562933	NM_001086730	slc25a1.L	2631.88	2963.83	2838.23	2847.75	2170.65	2388.28	2582.55	-0.258659	0.0752835	-3.4358	0.000590805	0.00973749
chr9_10L:84578423-84583669	NM_001091239	hspe1.L	196.32	238.224	221.182	238.254	144.402	160.892	174.966	-0.426164	0.124035	-3.43582	0.00059076	0.00973749
chr2L:162774154-162793251	NM_001093264	birc2.L	1027.14	868.284	888.762	929.472	1189.87	1290.56	995.868	0.330806	0.0962674	3.43633	0.000589661	0.00973749
chr6S:11988424-12069965	NM_001095791	esyt2.S	711.802	656.347	604.617	621.532	822.512	725.728	840.076	0.309783	0.0902917	3.43092	0.000601543	0.00989319
chr8L:116279960-116297841	NM_001092609	pias3.L	353.396	311.333	265.579	292.873	370.823	378.839	500.93	0.418759	0.122121	3.42904	0.00060571	0.00994039
chr1S:90020971-90026274	NM_001088323	admp.S	562.738	631.703	703.906	643.191	532.553	504.358	360.717	-0.407664	0.118908	-3.42839	0.000607171	0.00994307
chr5L:151142085-151179745	NM_001091886	gata4.L	704.221	652.24	588.472	631.891	820.201	791.91	740.609	0.299962	0.0875827	3.4249	0.000615027	0.0100206
chr1S:25155041-25174816	NM_001095693	ugdh.S	650.279	832.961	624.797	784.448	525.622	569.4	564.445	-0.370048	0.108052	-3.42471	0.000615455	0.0100206
chr5L:52868315-52898622	NM_001134783	tmem181.L	465.31	400.873	416.532	403.996	554.502	506.64	509.319	0.323655	0.0945102	3.42455	0.000615826	0.0100206
chr5S:26311258-26323585	NM_001085884	bmp2.S	347.202	387.729	400.387	407.762	281.872	328.631	276.83	-0.367486	0.10736	-3.42295	0.000619459	0.0100583
chr4L:90245933-90252418	NM_001093981	arpc5.L	1181.51	1243.69	1325.47	1295.8	1068.57	1057.78	1097.73	-0.246196	0.0719929	-3.41972	0.000626854	0.0101569
chr5L:17293272-17295349	NM_001088363	bix1.1.L	95.4973	130.612	106.555	129.015	71.6232	52.4897	82.6894	-0.507209	0.148375	-3.41843	0.000629829	0.0101621
chr7S:75243564-75288081	NM_001096253	erf.S	434.9	374.586	372.134	360.677	488.655	439.316	574.032	0.372879	0.109078	3.41845	0.000629788	0.0101621
chr5L:68088061-68109033	NM_001096014	adat2.L	140.024	156.899	175.977	174.217	112.056	109.544	111.451	-0.452855	0.132527	-3.41707	0.00063299	0.0101917
chr2L:58021684-58038482	NM_001091212	sesn2.L	2268.51	2482.45	2476.59	2433.39	1947.69	2055.09	2215.84	-0.236185	0.0691341	-3.41633	0.000634705	0.0101979
chr1L:57430332-57448496	NM_001089677	plk4.L	735.312	638.275	670.81	663.909	820.201	842.118	776.561	0.281885	0.0825503	3.41471	0.000638501	0.0102374
chr5S:30497370-30542946	NM_001090731	eif4a3.S	7522.43	8691.05	7711.49	8009.28	6985.57	6609.14	7128.06	-0.224855	0.0658706	-3.41359	0.00064113	0.0102581
chr1S:125050630-125054208	NM_001094931	srsf9.L	5902.91	6184.77	6467.54	6303.84	5368.28	5355.09	5737.92	-0.196183	0.0575157	-3.41094	0.000647384	0.0103366
chr2L:41867406-41875638	NM_001095737	supt4h1.L	570.82	679.348	639.328	663.909	423.963	434.752	583.619	-0.384668	0.112796	-3.41029	0.000648927	0.0103397
chr3S:27243641-27252956	NM_001093686	tmem127.S	1746.16	1604.31	1620.11	1576.43	1959.24	1800.63	1916.24	0.229044	0.0671995	3.40841	0.000653417	0.0103896
chr6L:115366106-115415322	NM_001095840	atp6v1h.L	216.214	277.654	235.712	255.205	154.799	190.561	183.355	-0.425047	0.124773	-3.40655	0.000657892	0.0104391
chr3S:34633140-34662941	NM_001085626	blm.S	290.129	275.189	205.844	239.196	350.03	345.748	324.766	0.407754	0.119718	3.40596	0.000659324	0.0104402
chr2S:74114976-74164923	NM_001092971	srrm1.S	7868.83	7186.14	7371.64	7337.84	8820.05	7964.75	8532.59	0.201303	0.0591176	3.40513	0.00066132	0.0104502
chr2S:76801326-76819883	NM_001091872	aldh3a2.S	495.969	575.022	528.737	565.971	426.274	449.586	430.224	-0.317096	0.0931941	-3.40253	0.000667639	0.0105284
chr2S:153685938-153736800	NM_001094552	sytl2.S	430.028	407.444	334.194	369.152	500.207	483.818	485.351	0.350708	0.103177	3.39911	0.000676067	0.0106394
chr9_10S:17247872-17249536	NM_001087305	socs3.S	105.308	142.113	129.964	144.082	103.969	66.1827	45.5391	-0.516233	0.151939	-3.39764	0.000679689	0.0106712
chr4L:110229792-110238709	NM_001271009	sec22b.S	678.524	571.736	636.906	589.513	757.82	803.321	711.848	0.305609	0.0899599	3.39717	0.000680875	0.0106712
chr1S:16677361-16680071	NM_001090898	msx1.S	2018.69	2092.26	2361.96	2212.09	1799.82	1684.24	1961.78	-0.270488	0.0797868	-3.39014	0.00069858	0.0109264
chr1L:151389727-151391869	NM_001092156	dynll1.L	3236.24	4135.23	3149.01	3616.18	2628.11	3006.75	2882.14	-0.318294	0.0939083	-3.38942	0.000700415	0.0109327
chr5L:108211769-108216035	NM_001097788	rpl22l1.L	408.929	483.019	458.508	452.023	321.149	368.569	370.305	-0.344785	0.101826	-3.38602	0.000709153	0.0110466
chr9_10S:96376692-96463368	NM_001090246	slc9a3r2.S	395.39	313.798	358.411	339.017	427.429	426.764	506.922	0.365196	0.108121	3.37766	0.00073105	0.0113646
chr2S:118526466-118538435	NM_001086155	rnd1.S	2075.77	2181.8	2372.45	2250.7	2001.98	1745.85	1901.86	-0.251491	0.0745101	-3.37526	0.000737461	0.0114411
chr8L:16822383-16862056	NM_001086851	nt5dc2-b	4809.76	4275.7	4296.9	4255.61	4564.25	5919.93	5546.18	0.292954	0.0868296	3.3739	0.000741119	0.0114746
chr8L:2129669-2135492	NM_001088114	pou5f3.3.L	135.232	170.864	153.374	167.625	107.435	95.8508	116.244	-0.45556	0.135102	-3.37196	0.000746352	0.0114806
chr6L:102324332-102348561	NM_001088535	rnmt.L	2867.53	3061.58	3163.54	3134.97	2491.8	2503.53	2849.79	-0.240185	0.0712389	-3.37154	0.000747494	0.0114806
chr5S:21885869-21960801	NM_001092095	epas1.S	1497.23	1343.09	1377.94	1343.83	1723.58	1693.36	1501.59	0.256836	0.0761762	3.37161	0.000747312	0.0114806
chr1L:57449036-57455183	NM_001127770	LOC100158321	126.238	90.3606	96.0606	105.472	162.885	130.083	172.569	0.471789	0.139928	3.37166	0.000747176	0.0114806
chr5S:106393273-106424251	NM_001093403	sap130.S	1153.63	1058.04	1033.26	1057.55	1293.84	1200.42	1278.69	0.245122	0.0727331	3.37015	0.00075126	0.0115153
chr9_10L:38576883-38592016	NM_001092302	narf.L	439.063	341.728	399.58	359.735	437.826	497.511	598	0.39255	0.116544	3.36826	0.000756439	0.0115716
chr8L:116860265-116868338	NM_001086436	rbm8a.L	7564.72	9008.13	7998.05	8506.51	6331.72	5757.9	7785.98	-0.320855	0.0953388	-3.36542	0.00076427	0.0116681
chr7L:106215790-106227016	NM_001089302	prmt1.L	48534.6	51986.9	50739.4	51277.3	44337.1	46432.9	46434.3	-0.162358	0.0483283	-3.35948	0.000780896	0.0118982
chr3L:132990565-133027456	NM_001091340	hook2.L	1170.78	1071.18	1064.74	1072.61	1247.63	1257.47	1311.05	0.236035	0.0703788	3.35377	0.000797174	0.0121221
chr3S:30646625-30655784	NM_001092711	snrnp27.S	4178.01	4431.78	4612.52	4456.19	3805.27	3668.58	4093.72	-0.212983	0.0635555	-3.35113	0.000804812	0.012214
chr8S:15557037-15968716	NM_001094046	map4k5.S	208.597	154.435	177.591	167.625	214.87	235.063	301.996	0.442246	0.132005	3.35023	0.000807449	0.0122298
chr3S:57549130-57554922	NM_001095514	pclaf.S	774.358	862.533	872.618	847.543	633.057	677.802	752.593	-0.294725	0.0880292	-3.34804	0.000813855	0.0123025
chr2L:136353264-136370110	NM_001096416	ccnt1.L	206.579	161.006	175.169	165.742	281.872	208.818	246.87	0.428461	0.12805	3.34605	0.000819717	0.0123667
chr2S:24845033-24934900	NM_001101785	pou2f1.S	1491.43	1348.02	1370.68	1350.42	1727.04	1634.03	1518.37	0.245945	0.0735258	3.34501	0.000822791	0.0123887
chr5L:128222579-128227010	NM_001091075	rnf7.L	401.084	539.699	401.194	468.032	315.373	375.416	306.79	-0.402009	0.120213	-3.34415	0.000825351	0.0124029
chr5L:125583066-125612237	NM_001086535	yeats2.L	1075.52	1038.33	896.027	955.84	1218.75	1214.11	1130.09	0.277751	0.0830983	3.34244	0.000830448	0.0124308
chr7L:37308024-37317029	NM_001088347	nodal.L	64.6421	87.0748	75.8798	87.5795	49.6742	44.5022	43.1423	-0.502895	0.150451	-3.34259	0.000830009	0.0124308
chr5S:110244614-110298700	NM_001127783	tfdp2.S	897.828	788.602	802.388	797.632	1009.66	895.749	1092.94	0.296987	0.0888993	3.34071	0.000835639	0.0124841
chr6L:60323484-60336631	NM_001089216	velo1.L	178.504	197.15	218.76	218.478	155.954	138.071	142.609	-0.420799	0.126037	-3.3387	0.00084171	0.0125503
chr3L:125984592-126029133	NM_001093077	brd4.L	9011.36	8435.58	8177.26	8166.55	10310.3	8885.6	10092.9	0.228365	0.0684323	3.3371	0.000846585	0.0125742
chr1L:79868165-79885390	NM_001095523	hnrnpd.L	1839.4	2038.86	1910.72	2002.09	1712.03	1685.38	1687.34	-0.216254	0.0648078	-3.33686	0.000847312	0.0125742
chr2S:27723514-27726911	NM_001095765	taf13.S	3605.86	4022.69	4003.06	3866.68	2925	3196.17	3621.56	-0.26658	0.0798967	-3.33656	0.000848233	0.0125742
chr9_10L:70728435-70740285	NM_001090261	frzb-1	963.754	960.287	1239.1	1111.22	850.237	710.894	910.782	-0.360016	0.107963	-3.33464	0.000854093	0.0126261
chr1L:73792697-73813289	NM_001093037	g3bp2.L	1662.99	1476.16	1519.21	1483.2	1788.27	1677.39	2033.68	0.272847	0.0818295	3.33434	0.000855027	0.0126261
chr7S:15938488-15965603	NM_001101767	kif11.S	1550.26	1442.48	1347.27	1382.44	1728.2	1858.82	1542.34	0.274594	0.0824836	3.32908	0.000871344	0.0128423
chr1S:39853862-39940340	NM_001090425	tll1.S	1778.62	1660.99	1578.95	1586.79	1859.89	1851.97	2133.15	0.256891	0.0772431	3.32574	0.000881838	0.0129713
chr7L:733413-746778	NM_001091276	xpnpep1.L	214.433	229.187	262.35	261.797	172.127	182.573	178.561	-0.401207	0.120656	-3.32522	0.000883486	0.0129713
chr3L:143932069-143936855	NM_001086240	cldn7.L	8067.1	9445.15	8149.01	8736.29	7138.06	7115.78	7818.34	-0.239485	0.0720455	-3.32409	0.000887083	0.0129818
chr2S:136091080-136159892	NM_001095174	pds5b.S	1173.2	1068.72	1090.57	1059.43	1261.49	1256.33	1302.66	0.233159	0.0701457	3.32393	0.000887588	0.0129818
chr6S:75218963-75227798	NM_001095739	txnl4a.S	1586.01	1692.21	1730.71	1705.45	1484.45	1464.01	1439.27	-0.214423	0.0646225	-3.31808	0.000906375	0.0132313
chr3S:72053557-72097114	NM_001091168	prkar2b.S	198.057	257.117	220.374	230.72	134.005	171.162	174.966	-0.429135	0.129432	-3.31552	0.000914732	0.0133027
chr1S:85660310-85690435	NM_001091699	tmem259.S	296.82	228.366	277.688	233.545	355.806	381.121	304.393	0.398638	0.120221	3.31587	0.000913589	0.0133027
chr1S:84037400-84071500	NM_001092393	upf1.S	1741.76	1624.85	1528.9	1618.81	1851.81	1818.88	2007.31	0.236144	0.071254	3.31412	0.000919333	0.0133443
chr3L:65793008-65804130	NM_001095898	gtse1.L	1534.23	1320.91	1448.17	1376.79	1634.63	1839.42	1585.48	0.265947	0.0803534	3.30972	0.00093391	0.0135302
chr1L:145225888-145234744	NM_001097712	sds.L	57.285	133.898	38.7471	79.104	26.5699	34.2324	31.1583	-0.479108	0.144799	-3.30878	0.000937033	0.0135498
chr2L:308495-320512	NM_001087147	cbs.L	2100.74	2604.03	2119.79	2319.44	1794.05	1707.06	2060.04	-0.305949	0.0927884	-3.29728	0.000976264	0.0140906
chr5L:158786989-158817340	NM_001091195	nrbp1.L	971.519	1093.36	1048.59	1051.9	912.618	895.749	826.894	-0.257615	0.0782079	-3.29397	0.000987824	0.0142306
chr4L:116184446-116190474	NM_001093057	mpst.L	622.326	694.955	700.677	671.443	571.831	530.603	564.445	-0.283835	0.0861888	-3.29317	0.000990636	0.0142443
chr3L:2764475-2794009	NM_001095961	fbln1.L	987.349	911	866.16	902.163	1142.51	1068.05	1034.22	0.257109	0.078112	3.29155	0.000996386	0.0143002
chr6L:9229904-9244873	NM_001094591	csrnp1.L	349.099	308.869	274.459	301.349	367.358	379.98	462.581	0.375648	0.114153	3.29074	0.00099926	0.0143075
chr2L:145014082-145030265	NM_001095495	atf1.L	476.983	400.873	417.339	413.413	495.587	624.171	510.517	0.348401	0.105886	3.29035	0.00100063	0.0143075
chr5L:2650405-2738634	NM_001091397	psme4.L	1202.88	1049.83	1132.55	1086.74	1236.08	1333.92	1378.16	0.253472	0.0770581	3.28937	0.00100413	0.0143209
chr2L:2062188-2089109	NM_001093033	man1a2.L	297.741	389.372	318.857	363.502	229.887	296.681	188.148	-0.435994	0.13256	-3.28904	0.0010053	0.0143209
chr3L:58047133-58068533	NM_001094681	ifrd1.L	668.497	690.848	818.533	731.712	606.487	577.387	586.016	-0.305626	0.092969	-3.28739	0.00101119	0.014378
chr4S:3544157-3551639	NM_001092006	MGC80163	910.935	1095.83	937.196	1018.94	733.56	812.45	867.639	-0.303943	0.0926244	-3.28146	0.00103272	0.014657
chr7L:98070477-98108273	NM_001088184	lig1.L	541.934	497.805	450.435	468.974	628.436	660.686	545.271	0.3274	0.0998022	3.28049	0.00103627	0.0146801
chr6S:105566105-105590394	NM_001093261	snx31.S	578.016	683.455	590.894	668.617	495.587	498.653	530.89	-0.311231	0.0949027	-3.27948	0.00104	0.0147058
chr2L:56817904-56827869	NM_001086171	ptafr.L	1932.05	2406.88	1940.59	2084.01	1666.97	1826.87	1666.97	-0.288493	0.0880165	-3.27771	0.00104652	0.0147708
chr2L:54081547-54132781	NM_001095080	hipk1.L	486.633	473.983	355.989	412.471	552.192	599.068	526.096	0.364935	0.111371	3.27674	0.00105015	0.0147947
chr5L:4967703-5012430	NM_001093135	fbxo11.L	2090.2	1735.75	2052.79	1824.1	2434.03	2112.14	2382.41	0.277998	0.0848784	3.27526	0.00105566	0.0148451
chr8S:77487233-77508245	NM_001090358	exo1.S	492.724	406.623	440.749	427.538	583.383	613.902	484.152	0.344725	0.105316	3.27323	0.00106326	0.0149246
chr3L:31014094-31056026	NM_001090687	shroom1.L	691.086	682.634	532.773	589.513	800.563	741.703	799.331	0.328715	0.100758	3.26241	0.00110467	0.0154776
chr8L:23750566-23765653	NM_001091354	mcts1.L	1057.51	1115.54	1189.05	1168.67	931.102	920.853	1019.84	-0.255079	0.0784465	-3.25163	0.00114744	0.0160474
chr1L:94196798-94260419	NM_001088369	wrn.L	1259.52	1059.68	1208.43	1108.4	1507.55	1395.54	1277.49	0.281059	0.0865111	3.24882	0.00115884	0.0161773
chr6L:15549710-15556438	NM_001094517	idi1.L	134.375	156.077	189.699	161.975	90.1066	74.1703	134.22	-0.479714	0.14775	-3.24679	0.00116714	0.0162635
chr6S:75123662-75128788	NM_001090747	gmnn.S	2129.22	2325.55	2251.37	2292.13	2038.95	1978.63	1888.67	-0.207689	0.0639877	-3.24577	0.00117133	0.0162924
chr5S:99118719-99125551	NM_001086037	selenot.S	2893.36	3006.54	3324.99	3105.77	2524.14	2553.74	2844.99	-0.237113	0.0732323	-3.23783	0.00120444	0.0166969
chr3L:122239390-122275681	NM_001095876	xpo7.L	1284.84	1200.98	1186.63	1140.42	1359.69	1449.17	1372.16	0.230594	0.071232	3.23723	0.00120696	0.0166969
chr8L:36092706-36103769	NM_001095917	tmem185a.L	384.505	437.838	448.014	440.722	289.959	305.81	384.685	-0.365576	0.112921	-3.23745	0.00120601	0.0166969
chr8S:13731584-13736189	NM_001101793	bmp4.S	1720.54	1786.68	2007.59	1877.78	1498.31	1457.16	1695.73	-0.26437	0.081681	-3.23662	0.00120956	0.0167028
chr6L:50777136-50835735	NM_001089099	topbp1.L	564.111	494.519	520.665	491.575	653.851	610.478	613.579	0.287609	0.0889542	3.23322	0.00122403	0.0168117
chr3L:113014728-113029432	NM_001089248	mob1a.L	1786.65	1494.24	1771.07	1579.26	1997.36	1885.07	1992.93	0.257608	0.0796654	3.23362	0.0012223	0.0168117
chr1L:167814864-167821045	NM_001094649	lyrm7.L	128.789	145.398	159.025	162.917	90.1066	103.838	111.451	-0.442319	0.136792	-3.23352	0.00122277	0.0168117
chr1L:196495134-196503331	NM_001090590	fst.L	342.376	393.48	364.869	410.588	299.2	308.092	278.028	-0.343264	0.106216	-3.23175	0.00123035	0.0168683
chr7S:58120247-58122243	NM_001089105	hes4.S	827.369	878.963	975.136	908.755	812.115	685.79	703.459	-0.2952	0.0914501	-3.22799	0.00124665	0.0170475
chr5S:33231722-33239507	NM_001093149	srsf7.S	21414.3	22728.2	22902.8	22536.2	20597.5	19172.4	20548.9	-0.171013	0.0529829	-3.22771	0.00124786	0.0170475
chr1S:46720763-46727067	NM_001093849	lsm6.S	358.792	392.658	414.11	412.471	292.269	308.092	333.154	-0.334284	0.103584	-3.22718	0.00125019	0.0170488
chr9_10S:1438719-1448841	NM_001101773	wipf2.S	818.004	722.885	750.726	707.228	991.173	820.437	915.575	0.290979	0.0901813	3.2266	0.0012527	0.0170527
chr5L:17261346-17277500	NM_001099907	acbd3.L	1654.48	1450.7	1485.31	1448.36	1833.32	1595.23	2113.97	0.302281	0.0937273	3.22511	0.00125924	0.0171113
chr6L:64505426-64544785	NM_001090004	sdha.L	1276.63	1566.52	1273	1396.56	1132.11	1139.94	1151.66	-0.279866	0.0869262	-3.21958	0.0012838	0.0173891
chr2L:150464523-150470751	NM_001101757	krt5.7.L	55866.8	54853	49940.2	52073.1	58808.4	58781.7	60744.3	0.178716	0.0555107	3.21948	0.00128422	0.0173891
chr1S:130745413-130752011	NM_001086713	ran.S	9392.84	10164.8	9809.48	9915.31	8549.73	9079.58	8838.18	-0.170001	0.0528339	-3.21765	0.00129248	0.0174087
chr6S:97122083-97214375	NM_001087670	ncoa2.S	188.85	171.685	146.109	150.674	225.267	223.652	215.711	0.399114	0.124036	3.21773	0.00129208	0.0174087
chr5S:105649126-105701108	NM_001096714	epha4.S	418.838	303.94	393.122	365.385	427.429	506.64	516.509	0.371602	0.115476	3.21801	0.00129082	0.0174087
chr6L:114029971-114034187	NM_001086282	snai2.L	405.809	342.549	354.375	364.444	456.309	492.947	424.232	0.325918	0.101323	3.21661	0.00129715	0.017441
chr7L:67449731-67487334	NM_001088548	ddx25.L	1422.7	1410.45	1774.3	1607.51	1294.99	1109.13	1339.81	-0.314786	0.0980336	-3.211	0.00132276	0.0177541
chr3L:133950057-133964983	NM_001096962	zswim4.L	4858.38	5557.18	5339.03	5487.37	4154.15	3561.31	5051.24	-0.317177	0.0988397	-3.20901	0.00133195	0.0178463
chr4S:47857480-47860676	NM_001086781	uqcrfs1.S	3176.69	3499.42	3340.33	3393.94	2883.41	2835.59	3107.44	-0.20389	0.0635582	-3.20792	0.00133696	0.017851
chr9_10S:46271862-46303790	NM_001094146	ccnt2.S	550.488	433.731	516.628	496.284	588.004	612.761	655.523	0.31701	0.0988062	3.2084	0.00133477	0.017851
chr5L:11105264-11119727	NM_001094018	atf3.L	69.3817	92.825	87.181	85.696	42.7429	47.9254	59.9198	-0.481521	0.150173	-3.20643	0.00134392	0.0179127
chr4S:84585505-84634956	NM_001087716	nr5a2.S	84.0723	65.7168	57.3135	62.1532	122.453	114.108	82.6894	0.477389	0.149126	3.20125	0.00136833	0.0182064
chr6S:33188712-33195642	NM_001087298	cbx3.S	4756.9	5162.06	4957.21	5046.65	4474.14	4349.8	4551.51	-0.175258	0.0548033	-3.19795	0.00138409	0.0183842
chr2S:119474962-119541805	NM_001086506	spats2.S	1653.23	1516.42	1566.84	1500.15	1811.37	1786.93	1737.68	0.208647	0.0653222	3.19411	0.00140262	0.0185981
chr9_10S:876173-879954	NM_001087819	krt.S	50808.9	49695.9	45161.4	47053.7	54109	56618.2	52215.3	0.191372	0.0599741	3.19091	0.00141825	0.0187405
chr8S:3825470-3830892	NM_001091783	srsf5.S	31049.8	32915.1	34540.6	33349.9	31188.4	26211.8	28092.8	-0.224356	0.0703045	-3.1912	0.00141685	0.0187405
chr1L:61706721-61720249	NM_001087937	casp6.L	698.462	690.848	887.955	800.457	655.006	547.719	608.786	-0.338245	0.106044	-3.18966	0.00142442	0.0187896
chr8L:56116173-56141962	NM_001094705	shkbp1.L	800.593	640.739	791.087	694.985	879.117	882.056	915.575	0.296884	0.0932304	3.18441	0.00145047	0.0191004
chr1L:184379840-184383726	NM_001093433	rps23.L	3762.34	4216.56	3894.89	4063.5	3251.93	3484.86	3662.3	-0.21568	0.0678281	-3.17981	0.00147372	0.0193733
chr4L:62397135-62399339	NM_001097031	uqcrfs1.L	3150.45	3505.17	3261.22	3368.51	2803.7	2964.53	2999.59	-0.199795	0.0629141	-3.17569	0.00149482	0.019617
chr8L:1525640-1531952	NM_001086264	slc31a1.L	317.776	366.371	371.327	346.551	291.114	254.461	276.83	-0.341521	0.107603	-3.17391	0.00150401	0.0197039
chr8S:64298320-64303121	NM_001095694	hmgb3.S	27224.7	29511	28262	28767.5	24710	26482.2	25615.7	-0.166852	0.0525794	-3.17333	0.00150699	0.0197092
chr4L:27679236-27698347	NM_001095440	mrpl11.L	206.961	241.509	244.591	234.487	177.903	180.291	162.982	-0.378958	0.119476	-3.17183	0.00151484	0.019778
chr3S:114067463-114068836	NM_001087024	hnrpa0	33368.5	35758.2	37160.9	36337	29325.1	27514.9	34114.8	-0.246132	0.077658	-3.16943	0.00152739	0.0198898
chr4L:24749116-24859844	NM_001087700	plcb3.L	253.762	236.581	196.157	198.702	265.699	336.619	288.814	0.393077	0.12403	3.1692	0.00152859	0.0198898
chr1S:128361632-128373555	NM_001099875	trmt2a.S	637.81	530.663	603.809	573.504	701.214	692.636	725.03	0.281761	0.0889728	3.16682	0.00154113	0.0200191
chr9_10L:84786344-84811104	NM_001088112	fscn1.L	3747.53	4764.47	3531.64	4217	3322.39	3320.55	3329.15	-0.293732	0.0927734	-3.16613	0.00154484	0.0200268
chr1L:128860831-128878622	NM_001094346	zfand5.L	1212.91	997.253	1183.4	1086.74	1380.48	1258.61	1370.97	0.270074	0.0853117	3.16573	0.00154695	0.0200268
chr2S:60090709-60121970	NM_001087216	hnf1b.S	343.975	317.084	245.398	282.514	428.584	466.702	323.567	0.407161	0.128658	3.16468	0.00155252	0.0200649
chr1L:105380239-105415476	NM_001087903	smc2.L	2987.09	2816.79	2700.19	2755.46	3249.61	3391.29	3009.17	0.211177	0.0668149	3.16063	0.00157429	0.0202779
chr1L:7753035-7825976	NM_001197285	sfxn5.L	97.286	88.7177	55.699	73.4537	115.521	122.096	128.228	0.467263	0.147819	3.16104	0.00157207	0.0202779
chr8S:93434781-93450354	NM_001087896	ubqln4.S	3215.95	2873.47	3063.44	2940.03	3625.06	3579.57	3214.1	0.218569	0.0692093	3.15808	0.00158812	0.0203876
chr1L:218761927-218767308	NM_001096130	MGC115657	121.79	156.899	145.302	140.315	90.1066	87.8633	110.253	-0.438447	0.138833	-3.15808	0.00158812	0.0203876
chr2S:138076619-138113532	NM_001135227	pan3.S	268.649	215.223	237.326	214.711	286.493	281.847	376.297	0.394011	0.124821	3.15662	0.00159611	0.0204558
chr3L:115073812-115078817	NM_001088895	MGC53867	2659.4	3175.77	2636.42	2912.72	2376.27	2518.37	2336.87	-0.250902	0.0795415	-3.15436	0.00160853	0.0205806
chr3L:136281122-136291992	NM_001088949	aurkb.L	3763.07	3512.56	3506.62	3546.5	4105.63	3863.7	4043.39	0.178574	0.0566527	3.15209	0.00162109	0.0207067
chr9_10L:24499519-24524755	NM_001091820	mbtd1.L	2097.94	1942.75	2006.78	1878.72	2181.04	2281.02	2297.33	0.203437	0.0645856	3.14988	0.00163337	0.0208289
chr2L:179820522-179881321	NM_001094663	fam168a.L	932.671	832.961	816.919	832.476	1147.13	907.16	1059.38	0.29294	0.0930822	3.14711	0.00164896	0.0209927
chr3S:101478856-101490005	NM_001171577	atp6v0e1.S	404.653	494.519	420.568	471.799	317.684	391.391	331.956	-0.34859	0.110811	-3.1458	0.00165636	0.0210519
chr3L:144005909-144019197	NM_001090946	gps2.L	851.362	781.209	762.027	764.672	1000.41	909.442	890.409	0.257274	0.081929	3.14021	0.00168829	0.0214223
chr2L:1342511-1391797	NM_001090283	gsk3b.L	463.927	381.979	406.038	408.704	548.726	447.304	590.81	0.344694	0.109822	3.13865	0.00169728	0.0214733
chr7L:85609503-85614075	NM_001096574	tmem52.L	1331.59	1423.59	1487.73	1424.81	1141.35	1259.75	1252.32	-0.23193	0.0738974	-3.13854	0.00169791	0.0214733
chr6L:31393905-31399127	NM_001091836	dlx6.L	178.447	187.293	231.676	216.594	162.885	139.212	133.022	-0.411752	0.13137	-3.13428	0.00172274	0.0217481
chr8L:26874765-26893341	NM_001095614	xiap.L	217.427	256.296	253.471	243.904	172.127	189.419	189.347	-0.369862	0.118022	-3.13385	0.00172532	0.0217481
chr4S:100908174-100921883	NM_001091041	wbp11.S	3548.11	3369.63	3257.18	3231.96	3970.47	3567.02	3892.39	0.203093	0.0648366	3.13238	0.00173398	0.0217856
chr6S:114226102-114252792	NM_001095565	rad21.S	3945.65	3611.14	3773.81	3681.16	4298.55	4256.23	4052.98	0.181195	0.0578449	3.13244	0.00173363	0.0217856
chr8S:2811509-2832782	NM_001091912	srsf5a.S	5622.64	5913.69	6101.06	6017.56	5144.16	5004.78	5554.57	-0.191268	0.0610724	-3.13182	0.00173724	0.0217909
chr1S:290468-307646	NM_001086428	MGC69154	708.271	1113.08	589.279	850.368	548.726	546.578	601.595	-0.426931	0.136344	-3.13127	0.00174054	0.0217965
chr6L:30061349-30073699	NM_001086366	tfpi2.L	59.9784	42.7159	39.5544	44.2606	91.2618	82.1579	59.9198	0.476461	0.152203	3.13043	0.00174548	0.0218228
chr3L:63575133-63588247	NM_001096069	creld2.L	292.612	337.62	339.037	320.183	257.613	256.743	244.473	-0.336557	0.107692	-3.12517	0.00177703	0.0221751
chr2S:46067328-46081024	NM_001101775	ddx3x.S	2110.52	1621.56	2045.53	1777.02	2377.43	2002.6	2839	0.344263	0.110172	3.12477	0.00177944	0.0221751
chr9_10S:27148665-27181696	NM_001090018	elmo1.S	324.679	269.439	255.085	277.806	311.908	362.864	470.97	0.398147	0.127513	3.12239	0.00179388	0.0223187
chr7L:7993089-8020522	NM_001087923	scnn1a.L	723.345	621.024	622.376	630.949	880.273	668.674	916.774	0.337285	0.108068	3.12104	0.00180215	0.0223852
chr2L:80326741-80335258	NM_001092893	atp5if1.L	265.549	479.733	189.699	361.618	172.127	225.934	164.18	-0.474519	0.152065	-3.12049	0.00180548	0.0223902
chr3L:12948022-12968161	NM_001092207	bpgm.L	324.343	304.762	240.555	281.573	356.961	405.084	357.122	0.361266	0.115823	3.11913	0.00181385	0.0224577
chr5L:151083229-151094453	NM_001086941	ctsb.L	8693.96	8988.42	10050.8	9556.52	7109.18	7634.97	8823.8	-0.256954	0.0824427	-3.11675	0.00182855	0.0225467
chr2L:162018674-162071484	NM_001093084	zmym2.L	756.876	667.026	698.256	678.035	886.049	834.13	777.76	0.265353	0.0851435	3.11654	0.00182986	0.0225467
chr6L:39842721-39916311	NM_001094829	hibadh.L	1278.2	1394.84	1354.54	1389.97	1163.3	1151.35	1215.17	-0.217202	0.0696758	-3.11732	0.001825	0.0225467
chr4S:86417137-86441690	NM_001096790	trmt1l.S	989.97	930.715	885.533	888.979	1084.75	1122.82	1027.03	0.24022	0.0771998	3.11167	0.00186034	0.0228854
chr9_10L:23993716-24004597	NM_001092618	slc16a3.L	8251.68	8327.14	10216.3	9186.43	6138.8	7421.59	8219.8	-0.307118	0.0987601	-3.10974	0.00187251	0.0229982
chr9_10L:4321611-4334500	NM_001092407	znf652.L	1215.01	1017.79	1185.82	1039.65	1456.72	1210.69	1379.35	0.286505	0.0922102	3.10708	0.00188944	0.0231691
chr3S:15878588-15894636	NM_001087706	cdx1.S	2486.47	2204.8	2345.82	2256.35	2913.45	2462.45	2735.94	0.236098	0.076056	3.10426	0.00190753	0.0233535
chr1L:143361500-143378395	NM_001092240	sf3a1.L	14747.4	13833.4	13716.5	13639.8	16888.1	15531.3	14875.7	0.190905	0.0617382	3.09217	0.00198696	0.0242574
chr9_10S:76540260-76543791	NM_001093896	atp5mf.S	222.896	278.475	239.748	263.68	202.162	195.125	158.188	-0.386839	0.125107	-3.09207	0.00198769	0.0242574
chr3S:2566821-2596272	NM_001086088	MGC53884	698.899	864.998	699.87	784.448	655.006	615.043	574.032	-0.306965	0.0993577	-3.08949	0.00200498	0.0243907
chr3S:60887576-60907961	NM_001096566	etfa.S	1157.95	1234.65	1360.99	1259.07	984.242	939.11	1169.64	-0.285699	0.0924709	-3.08961	0.0020042	0.0243907
chr7S:8171911-8205537	NM_001086144	ccdc6.S	1253.7	1085.97	1122.86	1144.18	1547.99	1210.69	1410.51	0.2828	0.0917647	3.0818	0.00205756	0.0248332
chr6S:6789689-6829094	NM_001086147	vill.S	2019.06	2001.9	1715.37	1823.16	2147.54	2204.57	2221.83	0.230859	0.0748737	3.08332	0.00204706	0.0248332
chr1L:35219132-35306747	NM_001089273	mtus1.L	610.241	551.2	519.05	532.069	743.957	729.151	586.016	0.315597	0.102394	3.08219	0.00205487	0.0248332
chr1L:166137257-166163643	NM_001096788	wsb2.L	311.462	257.939	288.182	263.68	356.961	362.864	339.146	0.330848	0.107351	3.08194	0.00205657	0.0248332
chr3L:133251228-133252338	NM_001170443	ier2.L	891.529	1032.58	975.136	989.742	786.7	669.815	895.202	-0.307877	0.0998573	-3.08317	0.00204811	0.0248332
chr7S:16932131-16933901	NM_001087981	ventx2.1.S	3859.95	3960.26	4562.47	4185.92	3674.73	3090.05	3686.27	-0.258978	0.0840726	-3.08041	0.00206719	0.0248863
chr4L:16622464-16628178	NM_001092261	tmem258.L	336.887	459.196	329.351	405.879	224.111	310.374	292.409	-0.40228	0.130601	-3.08022	0.00206845	0.0248863
chr9_10L:821535-829625	NM_001091143	ttc25.L	680.888	648.132	595.737	597.989	760.13	745.126	738.212	0.260475	0.0845924	3.07918	0.0020757	0.0248881
chr6L:108758692-108801630	NM_001092356	rbbp8.L	1037.32	938.108	976.751	932.298	1169.08	1115.98	1091.74	0.230194	0.0747987	3.07751	0.00208736	0.0248881
chr1S:126868299-126871799	NM_001093462	MGC80358	536.288	569.272	594.123	624.357	455.154	466.702	508.12	-0.288079	0.0936108	-3.07741	0.00208808	0.0248881
chr4L:3862199-3880477	NM_001095550	nat1	26101.5	23321.3	25749.1	24411.1	27920.4	27597.1	27609.9	0.171776	0.0558142	3.07763	0.00208651	0.0248881
chr2L:138807101-138823355	NM_001096506	suox.L	282.238	243.152	248.627	242.021	314.218	320.644	324.766	0.330748	0.107467	3.07767	0.00208624	0.0248881
chr2S:109059721-109063830	NM_001096595	klf5.S	445.241	442.767	337.423	367.269	529.088	520.333	474.565	0.344109	0.111777	3.07852	0.0020803	0.0248881
chr4S:74448855-74493718	NM_001095974	acbd6.S	1542.08	1687.28	1612.85	1687.55	1413.98	1482.26	1368.57	-0.213229	0.0693353	-3.07534	0.00210262	0.0250225
chr9_10L:1724516-1735939	NM_001086509	wipf2.L	1075.3	902.785	1025.18	964.316	1290.37	1086.31	1182.82	0.27166	0.0884624	3.07092	0.00213403	0.0253569
chr9_10L:104849896-104858138	NM_001086233	mcrip2.L	258.182	154.435	258.314	202.469	350.03	281.847	301.996	0.42608	0.1388	3.06975	0.0021424	0.025417
chr4S:1712315-1740261	NM_001091506	nxf1.S	300.542	243.152	263.158	244.846	358.116	284.129	409.852	0.382361	0.12471	3.066	0.00216944	0.0256979
chr1L:88211343-88227611	NM_001092657	lsm7.L	658.605	766.423	699.063	725.12	538.329	589.939	632.754	-0.283127	0.092379	-3.06484	0.00217787	0.025758
[truncated: 9,621 more rows]

## Sheet: insrr MO 7.2 vs control 7.2
pos	id	symb	baseMean	control pH 7.2			insrr MO pH 7.2			log2FoldChange	lfcSE	stat	pvalue	padj
[truncated: 10,270 more rows]

[truncated: 1 more sheets: insrr MO 8.5 vs control 8.5]
