# Supplementary material for: Insulin Receptor-Related Receptor Regulates the Rate of Early Development in Xenopus laevis
Source: Int J Mol Sci. 2022 Aug 17;23(16):9250. doi: 10.3390/ijms23169250 (PMC9409083; doi:10.3390/ijms23169250)
Supplement: Supplementary file 1 [file ijms-23-09250-s001.zip › supplement file S2.xlsx]

## Sheet: st10-st15
ID	baseMean	log2FoldChange	lfcSE	stat	pvalue	padj
LOC108704873	0.110631	0.493165	4.97699	0.0990889	0.921068	NA
LOC108704861	0.186227	-2.48137	4.99005	-0.497264	0.619003	NA
dok1.L	1050.11	-0.494146	0.464487	-1.06385	0.287396	0.376278
mrps26.L	1239.88	-0.830035	0.518996	-1.59931	0.109752	0.169842
LOC108704862	0.442374	-3.38856	4.9033	-0.691078	0.489517	NA
dqx1.L	420.644	1.52316	0.422462	3.60543	0.000311635	0.00101169
LOC108704874	1.62634	-0.29988	3.39243	-0.0883968	0.929561	NA
LOC108704860	12.4313	-2.36979	1.15292	-2.05546	0.0398345	0.0723553
mig30.L	508.46	2.5636	0.465127	5.51162	3.55542e-08	2.45446e-07
pcgf1.L	372.726	-0.436197	0.571504	-0.763244	0.445318	0.534871
LOC108704863	2.71508	-1.00935	1.97089	-0.51213	0.60856	0.684647
LOC108704858	221.042	-2.26636	0.361319	-6.27245	3.55401e-10	3.37294e-09
LOC121401503	15.9957	-4.75127	1.11515	-4.26066	2.03826e-05	8.42333e-05
LOC108704859	1.07171	3.29664	3.81921	0.863172	0.388043	NA
LOC121401504	0.378159	-2.48137	4.99005	-0.497264	0.619003	NA
mogs.L	234.355	1.19388	0.470189	2.53916	0.0111119	0.0241471
LOC121401506	174.492	-2.99662	0.614796	-4.87417	1.09265e-06	5.75472e-06
LOC108704864	14.1116	-0.886096	0.849138	-1.04353	0.296705	0.386135
LOC108704856	1.79633	0.866261	2.81772	0.307434	0.758513	NA
LOC121400944	1.69703	0.282567	3.34955	0.0843598	0.93277	NA
LOC108704872	19.9711	-1.10151	0.835026	-1.31913	0.187126	0.265488
LOC108704855	0.0699199	0	4.99758	0	1	NA
wdr54.L	271.187	0.714993	0.465113	1.53725	0.124233	0.188332
LOC108704854	186.945	0.736579	0.390131	1.88803	0.059022	0.101055
LOC121401513	3.59864	1.73478	1.76049	0.985399	0.324428	0.415625
LOC108704853	10.5534	2.59008	1.36868	1.89239	0.0584393	0.100262
nop56.L	17056.8	-1.59387	0.623587	-2.55597	0.0105891	0.0231271
LOC121396245	74.9766	-1.33556	0.715863	-1.86567	0.0620879	0.105395
LOC121396382	62.6438	-1.37195	0.515401	-2.66191	0.00776992	0.0176391
LOC121396381	59.8818	-1.94123	0.736197	-2.63683	0.00836851	0.0187914
LOC108704851	2.6535	2.9882	2.28513	1.30767	0.190984	0.270013
LOC108704870	0	NA	NA	NA	NA	NA
LOC108704869	4.05879	-6.56623	2.81753	-2.33049	0.0197801	0.0396654
LOC108704868	0	NA	NA	NA	NA	NA
LOC108704865	0	NA	NA	NA	NA	NA
LOC121401514	0.0862211	0.311208	4.98858	0.0623842	0.950257	NA
LOC121401515	0	NA	NA	NA	NA	NA
LOC121401478	0	NA	NA	NA	NA	NA
LOC121401516	0	NA	NA	NA	NA	NA
LOC121401517	0	NA	NA	NA	NA	NA
LOC121400945	0	NA	NA	NA	NA	NA
LOC121401518	0	NA	NA	NA	NA	NA
LOC121396297	0	NA	NA	NA	NA	NA
LOC121401520	0	NA	NA	NA	NA	NA
LOC121400946	0	NA	NA	NA	NA	NA
LOC121401522	0	NA	NA	NA	NA	NA
LOC121401524	2.50443	-0.943867	2.13019	-0.443091	0.6577	0.727847
LOC121401526	3.8916	-2.78814	2.19426	-1.27065	0.203852	0.284854
LOC121401480	0	NA	NA	NA	NA	NA
LOC121401481	0.175936	0.493178	4.97699	0.0990916	0.921066	NA
LOC108705124	0.46438	-1.08909	4.98103	-0.218648	0.826924	NA
LOC121401528	0.695008	0.493178	4.97699	0.0990915	0.921066	NA
LOC108705129	12.0937	-2.5712	1.32577	-1.9394	0.0524522	0.0913998
LOC108705121	0	NA	NA	NA	NA	NA
trnar-acg	0	NA	NA	NA	NA	NA
trnav-cac	0	NA	NA	NA	NA	NA
trnae-cuc	0	NA	NA	NA	NA	NA
trnav-aac	0	NA	NA	NA	NA	NA
trnar-ccu	0	NA	NA	NA	NA	NA
trnar-acg_1	0	NA	NA	NA	NA	NA
trnar-acg_2	0	NA	NA	NA	NA	NA
trnav-cac_1	0	NA	NA	NA	NA	NA
trnae-cuc_1	0	NA	NA	NA	NA	NA
trnav-aac_1	0	NA	NA	NA	NA	NA
trnar-ccu_1	0	NA	NA	NA	NA	NA
trnar-acg_3	0	NA	NA	NA	NA	NA
trnar-acg_4	0	NA	NA	NA	NA	NA
trnae-cuc_2	0	NA	NA	NA	NA	NA
trnav-aac_2	0	NA	NA	NA	NA	NA
trnah-gug	0	NA	NA	NA	NA	NA
trnar-acg_5	0	NA	NA	NA	NA	NA
trnav-aac_3	0	NA	NA	NA	NA	NA
LOC121400947	0.458518	-3.66113	4.88313	-0.749751	0.453404	NA
trnar-acg_6	0	NA	NA	NA	NA	NA
trnav-cac_2	0	NA	NA	NA	NA	NA
LOC121401485	0	NA	NA	NA	NA	NA
LOC121401486	0	NA	NA	NA	NA	NA
trnav-aac_4	0	NA	NA	NA	NA	NA
trnav-cac_3	0	NA	NA	NA	NA	NA
trnae-cuc_3	0	NA	NA	NA	NA	NA
trnah-gug_1	0	NA	NA	NA	NA	NA
trnav-aac_5	0	NA	NA	NA	NA	NA
trnae-cuc_4	0	NA	NA	NA	NA	NA
trnav-cac_4	0	NA	NA	NA	NA	NA
trnar-acg_7	0	NA	NA	NA	NA	NA
trnah-gug_2	0	NA	NA	NA	NA	NA
trnav-aac_6	0	NA	NA	NA	NA	NA
trnae-cuc_5	0	NA	NA	NA	NA	NA
trnav-cac_5	0	NA	NA	NA	NA	NA
trnar-acg_8	0	NA	NA	NA	NA	NA
LOC121396241	0.936119	0.479521	3.59532	0.133374	0.893898	NA
LOC121401495	0.631475	-2.13664	4.54212	-0.470407	0.638064	NA
LOC108704782	0	NA	NA	NA	NA	NA
LOC108704781	0	NA	NA	NA	NA	NA
LOC121401497	0.316837	-2.48136	4.99005	-0.497263	0.619004	NA
LOC108704780	0	NA	NA	NA	NA	NA
LOC108704779	0	NA	NA	NA	NA	NA
LOC108704774	0.286568	1.52659	4.88147	0.312731	0.754485	NA
LOC108704775	0	NA	NA	NA	NA	NA
LOC121401499	0	NA	NA	NA	NA	NA
LOC121402012	0.359027	-2.63301	4.98019	-0.528697	0.597016	NA
LOC121402105	0.402216	-1.08909	4.98103	-0.218648	0.826924	NA
LOC108705332	0	NA	NA	NA	NA	NA
LOC121403121	0	NA	NA	NA	NA	NA
LOC108705333	0.610567	1.52659	4.88147	0.312731	0.754485	NA
LOC121403704	0	NA	NA	NA	NA	NA
LOC108705334	0	NA	NA	NA	NA	NA
LOC121393935	0.390146	0	4.99758	0	1	NA
trnay-aua	0	NA	NA	NA	NA	NA
trnar-ccu_2	0	NA	NA	NA	NA	NA
trnah-gug_3	0	NA	NA	NA	NA	NA
trnav-aac_7	0	NA	NA	NA	NA	NA
trnae-cuc_6	0	NA	NA	NA	NA	NA
trnaa-cgc	0	NA	NA	NA	NA	NA
trnar-acg_9	0	NA	NA	NA	NA	NA
trnar-ccu_3	0	NA	NA	NA	NA	NA
trnav-aac_8	0	NA	NA	NA	NA	NA
trnae-cuc_7	0	NA	NA	NA	NA	NA
trnav-cac_6	0	NA	NA	NA	NA	NA
trnar-acg_10	0	NA	NA	NA	NA	NA
trnar-ccu_4	0	NA	NA	NA	NA	NA
trnah-gug_4	0	NA	NA	NA	NA	NA
trnav-aac_9	0	NA	NA	NA	NA	NA
trnae-cuc_8	0	NA	NA	NA	NA	NA
trnav-cac_7	0	NA	NA	NA	NA	NA
trnar-acg_11	0	NA	NA	NA	NA	NA
trnar-ccu_5	0	NA	NA	NA	NA	NA
trnah-gug_5	0	NA	NA	NA	NA	NA
trnav-cac_8	0	NA	NA	NA	NA	NA
trnah-aug	0	NA	NA	NA	NA	NA
trnar-ccu_6	0	NA	NA	NA	NA	NA
trnah-gug_6	0	NA	NA	NA	NA	NA
trnav-aac_10	0	NA	NA	NA	NA	NA
trnae-cuc_9	0	NA	NA	NA	NA	NA
trnav-cac_9	0	NA	NA	NA	NA	NA
trnah-aug_1	0	NA	NA	NA	NA	NA
trnar-ccu_7	0	NA	NA	NA	NA	NA
trnah-gug_7	0	NA	NA	NA	NA	NA
trnav-aac_11	0	NA	NA	NA	NA	NA
trnae-cuc_10	0	NA	NA	NA	NA	NA
trnav-cac_10	0	NA	NA	NA	NA	NA
trnar-acg_12	0	NA	NA	NA	NA	NA
trnar-ccu_8	0	NA	NA	NA	NA	NA
trnav-aac_12	0	NA	NA	NA	NA	NA
trnae-cuc_11	0	NA	NA	NA	NA	NA
trnar-acg_13	0	NA	NA	NA	NA	NA
trnar-ccu_9	0	NA	NA	NA	NA	NA
trnav-cac_11	0	NA	NA	NA	NA	NA
trnar-acg_14	0	NA	NA	NA	NA	NA
trnah-gug_8	0	NA	NA	NA	NA	NA
trnav-aac_13	0	NA	NA	NA	NA	NA
trnae-cuc_12	0	NA	NA	NA	NA	NA
trnav-cac_12	0	NA	NA	NA	NA	NA
trnar-acg_15	0	NA	NA	NA	NA	NA
trnar-ccu_10	0	NA	NA	NA	NA	NA
trnah-gug_9	0	NA	NA	NA	NA	NA
trnav-aac_14	0	NA	NA	NA	NA	NA
trnae-cuc_13	0	NA	NA	NA	NA	NA
trnav-cac_13	0	NA	NA	NA	NA	NA
trnar-acg_16	0	NA	NA	NA	NA	NA
trnar-ccu_11	0	NA	NA	NA	NA	NA
trnah-gug_10	0	NA	NA	NA	NA	NA
trnav-aac_15	0	NA	NA	NA	NA	NA
trnae-cuc_14	0	NA	NA	NA	NA	NA
trnav-cac_14	0	NA	NA	NA	NA	NA
trnar-acg_17	0	NA	NA	NA	NA	NA
trnar-ccu_12	0	NA	NA	NA	NA	NA
trnah-gug_11	0	NA	NA	NA	NA	NA
trnav-aac_16	0	NA	NA	NA	NA	NA
trnae-cuc_15	0	NA	NA	NA	NA	NA
trnav-cac_15	0	NA	NA	NA	NA	NA
trnar-acg_18	0	NA	NA	NA	NA	NA
trnar-ccu_13	0	NA	NA	NA	NA	NA
trnae-cuc_16	0	NA	NA	NA	NA	NA
trnav-cac_16	0	NA	NA	NA	NA	NA
trnar-acg_19	0	NA	NA	NA	NA	NA
trnar-ccu_14	0	NA	NA	NA	NA	NA
trnah-gug_12	0	NA	NA	NA	NA	NA
trnav-aac_17	0	NA	NA	NA	NA	NA
trnae-cuc_17	0	NA	NA	NA	NA	NA
trnav-cac_17	0	NA	NA	NA	NA	NA
trnar-acg_20	0	NA	NA	NA	NA	NA
trnar-ccu_15	0	NA	NA	NA	NA	NA
trnah-gug_13	0	NA	NA	NA	NA	NA
trnav-aac_18	0	NA	NA	NA	NA	NA
trnae-cuc_18	0	NA	NA	NA	NA	NA
trnav-cac_18	0	NA	NA	NA	NA	NA
trnar-acg_21	0	NA	NA	NA	NA	NA
trnar-ccu_16	0	NA	NA	NA	NA	NA
trnah-gug_14	0	NA	NA	NA	NA	NA
trnav-aac_19	0	NA	NA	NA	NA	NA
trnae-cuc_19	0	NA	NA	NA	NA	NA
trnav-cac_19	0	NA	NA	NA	NA	NA
trnar-acg_22	0	NA	NA	NA	NA	NA
trnar-ccu_17	0	NA	NA	NA	NA	NA
trnav-aac_20	0	NA	NA	NA	NA	NA
trnar-acg_23	0	NA	NA	NA	NA	NA
trnar-ccu_18	0	NA	NA	NA	NA	NA
trnah-gug_15	0	NA	NA	NA	NA	NA
trnav-aac_21	0	NA	NA	NA	NA	NA
trnae-cuc_20	0	NA	NA	NA	NA	NA
trnav-cac_20	0	NA	NA	NA	NA	NA
trnar-acg_24	0	NA	NA	NA	NA	NA
trnar-ccu_19	0	NA	NA	NA	NA	NA
trnah-gug_16	0	NA	NA	NA	NA	NA
trnav-aac_22	0	NA	NA	NA	NA	NA
trnae-cuc_21	0	NA	NA	NA	NA	NA
trnav-cac_21	0	NA	NA	NA	NA	NA
trnar-acg_25	0	NA	NA	NA	NA	NA
trnar-ccu_20	0	NA	NA	NA	NA	NA
trnah-gug_17	0	NA	NA	NA	NA	NA
trnav-aac_23	0	NA	NA	NA	NA	NA
trnae-cuc_22	0	NA	NA	NA	NA	NA
trnav-cac_22	0	NA	NA	NA	NA	NA
trnar-acg_26	0	NA	NA	NA	NA	NA
trnar-ccu_21	0	NA	NA	NA	NA	NA
trnah-gug_18	0	NA	NA	NA	NA	NA
trnav-aac_24	0	NA	NA	NA	NA	NA
trnae-cuc_23	0	NA	NA	NA	NA	NA
trnav-cac_23	0	NA	NA	NA	NA	NA
trnar-acg_27	0	NA	NA	NA	NA	NA
trnar-ccu_22	0	NA	NA	NA	NA	NA
trnah-gug_19	0	NA	NA	NA	NA	NA
trnav-aac_25	0	NA	NA	NA	NA	NA
trnae-cuc_24	0	NA	NA	NA	NA	NA
trnav-cac_24	0	NA	NA	NA	NA	NA
trnar-acg_28	0	NA	NA	NA	NA	NA
trnar-ccu_23	0	NA	NA	NA	NA	NA
trnah-gug_20	0	NA	NA	NA	NA	NA
trnav-aac_26	0	NA	NA	NA	NA	NA
trnae-cuc_25	0	NA	NA	NA	NA	NA
trnav-cac_25	0	NA	NA	NA	NA	NA
trnar-acg_29	0	NA	NA	NA	NA	NA
trnar-ccu_24	0	NA	NA	NA	NA	NA
trnah-gug_21	0	NA	NA	NA	NA	NA
trnav-aac_27	0	NA	NA	NA	NA	NA
trnae-cuc_26	0	NA	NA	NA	NA	NA
trnav-cac_26	0	NA	NA	NA	NA	NA
trnar-acg_30	0	NA	NA	NA	NA	NA
trnar-ccu_25	0	NA	NA	NA	NA	NA
trnah-gug_22	0	NA	NA	NA	NA	NA
trnav-aac_28	0	NA	NA	NA	NA	NA
trnae-cuc_27	0	NA	NA	NA	NA	NA
trnav-cac_27	0	NA	NA	NA	NA	NA
trnar-acg_31	0	NA	NA	NA	NA	NA
trnar-ccu_26	0	NA	NA	NA	NA	NA
trnah-gug_23	0	NA	NA	NA	NA	NA
trnav-cac_28	0	NA	NA	NA	NA	NA
trnar-acg_32	0	NA	NA	NA	NA	NA
trnar-ccu_27	0	NA	NA	NA	NA	NA
trnah-gug_24	0	NA	NA	NA	NA	NA
trnav-aac_29	0	NA	NA	NA	NA	NA
trnav-cac_29	0	NA	NA	NA	NA	NA
LOC108705249	0	NA	NA	NA	NA	NA
LOC108705248	0	NA	NA	NA	NA	NA
LOC121394569	0.0862211	0.311208	4.98858	0.0623842	0.950257	NA
LOC121400389	0	NA	NA	NA	NA	NA
LOC121401533	0	NA	NA	NA	NA	NA
trnav-aac_30	0.0862211	0.311208	4.98858	0.0623842	0.950257	NA
trnac-aca	0	NA	NA	NA	NA	NA
trnav-cac_30	0	NA	NA	NA	NA	NA
LOC121400393	0	NA	NA	NA	NA	NA
trnar-acg_33	0	NA	NA	NA	NA	NA
trnav-cac_31	0	NA	NA	NA	NA	NA
trnae-cuc_28	0	NA	NA	NA	NA	NA
trnae-cuc_29	0	NA	NA	NA	NA	NA
trnav-aac_31	0	NA	NA	NA	NA	NA
trnav-aac_32	0	NA	NA	NA	NA	NA
LOC121400396	0	NA	NA	NA	NA	NA
trnav-cac_32	0	NA	NA	NA	NA	NA
trnak-cuu	0	NA	NA	NA	NA	NA
LOC108704760	0	NA	NA	NA	NA	NA
LOC108704766	0.64884	0	4.99758	0	1	NA
LOC108704767	0.445763	-2.48137	4.99005	-0.497264	0.619003	NA
LOC121400402	0	NA	NA	NA	NA	NA
LOC121400404	0	NA	NA	NA	NA	NA
LOC121400407	0.393705	2.37171	4.83889	0.490135	0.624039	NA
LOC121400408	0	NA	NA	NA	NA	NA
LOC108705119	1.57252	-3.52843	3.38073	-1.04369	0.296629	NA
LOC108705116	0	NA	NA	NA	NA	NA
LOC108705115	0.186227	-2.48137	4.99005	-0.497264	0.619003	NA
LOC121400412	0	NA	NA	NA	NA	NA
LOC108705120	0	NA	NA	NA	NA	NA
LOC121400413	0.0653049	0	4.99758	0	1	NA
LOC121401535	0	NA	NA	NA	NA	NA
LOC121400414	1.93541	1.49047	2.64548	0.563404	0.57316	NA
trnar-ccu_28	0	NA	NA	NA	NA	NA
trnah-gug_25	0	NA	NA	NA	NA	NA
trnav-aac_33	0	NA	NA	NA	NA	NA
LOC121401536	0.186227	-2.48137	4.99005	-0.497264	0.619003	NA
trnae-cuc_30	0	NA	NA	NA	NA	NA
trnav-cac_33	0	NA	NA	NA	NA	NA
trnar-acg_34	0	NA	NA	NA	NA	NA
trnah-gug_26	0	NA	NA	NA	NA	NA
trnav-aac_34	0	NA	NA	NA	NA	NA
trnae-cuc_31	0	NA	NA	NA	NA	NA
trnav-cac_34	0	NA	NA	NA	NA	NA
trnar-acg_35	0	NA	NA	NA	NA	NA
trnar-ccu_29	0	NA	NA	NA	NA	NA
trnav-aac_35	0	NA	NA	NA	NA	NA
trnae-cuc_32	0	NA	NA	NA	NA	NA
trnav-cac_35	0	NA	NA	NA	NA	NA
trnar-acg_36	0	NA	NA	NA	NA	NA
trnar-ccu_30	0	NA	NA	NA	NA	NA
trnah-gug_27	0	NA	NA	NA	NA	NA
trnav-aac_36	0	NA	NA	NA	NA	NA
trnae-cuc_33	0	NA	NA	NA	NA	NA
trnav-cac_36	0	NA	NA	NA	NA	NA
trnar-acg_37	0	NA	NA	NA	NA	NA
trnah-gug_28	0	NA	NA	NA	NA	NA
trnav-aac_37	0	NA	NA	NA	NA	NA
trnah-gug_29	0	NA	NA	NA	NA	NA
trnav-aac_38	0	NA	NA	NA	NA	NA
trnae-cuc_34	0	NA	NA	NA	NA	NA
trnav-cac_37	0	NA	NA	NA	NA	NA
trnar-acg_38	0	NA	NA	NA	NA	NA
trnah-gug_30	0	NA	NA	NA	NA	NA
trnav-aac_39	0	NA	NA	NA	NA	NA
trnae-cuc_35	0	NA	NA	NA	NA	NA
trnav-cac_38	0	NA	NA	NA	NA	NA
trnar-acg_39	0	NA	NA	NA	NA	NA
trnar-ccu_31	0	NA	NA	NA	NA	NA
trnah-gug_31	0	NA	NA	NA	NA	NA
trnav-aac_40	0	NA	NA	NA	NA	NA
trnae-cuc_36	0	NA	NA	NA	NA	NA
trnav-cac_39	0	NA	NA	NA	NA	NA
trnar-acg_40	0	NA	NA	NA	NA	NA
trnar-ccu_32	0	NA	NA	NA	NA	NA
trnah-gug_32	0	NA	NA	NA	NA	NA
trnav-aac_41	0	NA	NA	NA	NA	NA
trnae-cuc_37	0	NA	NA	NA	NA	NA
trnav-cac_40	0	NA	NA	NA	NA	NA
trnar-acg_41	0	NA	NA	NA	NA	NA
trnar-ccu_33	0	NA	NA	NA	NA	NA
LOC121400415	0	NA	NA	NA	NA	NA
LOC121400416	0	NA	NA	NA	NA	NA
LOC108705325	0	NA	NA	NA	NA	NA
xv2r1.L	0	NA	NA	NA	NA	NA
LOC108705330	1.66288	-0.332434	2.40677	-0.138124	0.890142	NA
LOC108705331	0.0653049	0	4.99758	0	1	NA
LOC121400421	0.272448	-1.08909	4.98103	-0.218648	0.826924	NA
trnar-acg_42	0	NA	NA	NA	NA	NA
trnar-ccu_34	0	NA	NA	NA	NA	NA
trnah-gug_33	0	NA	NA	NA	NA	NA
trnav-aac_42	0	NA	NA	NA	NA	NA
LOC121400422	0	NA	NA	NA	NA	NA
trnah-aug_2	0	NA	NA	NA	NA	NA
trnar-ccu_35	0	NA	NA	NA	NA	NA
trnah-gug_34	0	NA	NA	NA	NA	NA
trnav-aac_43	0	NA	NA	NA	NA	NA
trnae-cuc_38	0	NA	NA	NA	NA	NA
trnav-cac_41	0	NA	NA	NA	NA	NA
trnar-acg_43	0	NA	NA	NA	NA	NA
trnar-ccu_36	0	NA	NA	NA	NA	NA
trnah-gug_35	0	NA	NA	NA	NA	NA
trnav-aac_44	0	NA	NA	NA	NA	NA
trnae-cuc_39	0	NA	NA	NA	NA	NA
trnav-cac_42	0	NA	NA	NA	NA	NA
trnar-acg_44	0	NA	NA	NA	NA	NA
trnar-ccu_37	0	NA	NA	NA	NA	NA
trnah-gug_36	0	NA	NA	NA	NA	NA
trnav-aac_45	0	NA	NA	NA	NA	NA
trnae-cuc_40	0	NA	NA	NA	NA	NA
trnav-cac_43	0	NA	NA	NA	NA	NA
trnar-acg_45	0	NA	NA	NA	NA	NA
trnar-ccu_38	0	NA	NA	NA	NA	NA
LOC108705017	0	NA	NA	NA	NA	NA
LOC108705018	0	NA	NA	NA	NA	NA
LOC121401538	0	NA	NA	NA	NA	NA
LOC121401537	0	NA	NA	NA	NA	NA
LOC121400429	0	NA	NA	NA	NA	NA
LOC121400431	0	NA	NA	NA	NA	NA
LOC121400433	0	NA	NA	NA	NA	NA
LOC121400435	0	NA	NA	NA	NA	NA
LOC121400440	0	NA	NA	NA	NA	NA
LOC121400442	0	NA	NA	NA	NA	NA
v2rd-1.L	0	NA	NA	NA	NA	NA
LOC108719492	0	NA	NA	NA	NA	NA
LOC108719485	0	NA	NA	NA	NA	NA
LOC121400451	0	NA	NA	NA	NA	NA
LOC121400460	0	NA	NA	NA	NA	NA
LOC108719480	22.2216	1.27378	0.969158	1.31432	0.188739	0.26737
LOC121400972	0.650283	1.78099	4.56933	0.389771	0.696706	NA
LOC121400471	0	NA	NA	NA	NA	NA
LOC121400474	0	NA	NA	NA	NA	NA
LOC108719464	0	NA	NA	NA	NA	NA
LOC121400479	0	NA	NA	NA	NA	NA
LOC121400483	0	NA	NA	NA	NA	NA
LOC108697567	0.40749	0.126286	4.87376	0.0259114	0.979328	NA
LOC108697566	1.02289	-0.279332	3.31343	-0.0843028	0.932816	NA
LOC108697552	2.35347	3.37002	2.4525	1.37411	0.169406	NA
LOC121401545	0.0653049	0	4.99758	0	1	NA
LOC121401544	0.129768	0	4.99758	0	1	NA
LOC121401546	0.372483	0.493179	4.97699	0.0990918	0.921065	NA
LOC121401548	0.0862211	0.311208	4.98858	0.0623842	0.950257	NA
spr.L	334.597	0.44438	0.554994	0.800693	0.42331	0.513676
emx1.L	10.0927	-2.30063	1.29845	-1.77183	0.0764225	0.125497
sfxn5.L	62.4052	2.59137	0.545852	4.74739	2.06057e-06	1.03418e-05
rab11fip5.L	1084.12	1.38222	0.303824	4.54941	5.37975e-06	2.47607e-05
not.L	968.514	1.04566	0.561641	1.8618	0.0626314	0.106166
LOC108719446	0.494495	0.493165	4.97699	0.0990889	0.921068	NA
MGC108497.L	1.79477	-1.88863	2.35673	-0.801376	0.422914	NA
alms1.L	483.874	-0.871104	0.5011	-1.73838	0.0821432	0.133305
egr4.L	134.851	-3.20353	0.793539	-4.03701	5.41367e-05	0.000204381
fbxo41.L	9.03988	-0.0466107	1.04173	-0.0447436	0.964312	0.974428
cct7.L	1490.25	-1.85662	0.440553	-4.21429	2.50561e-05	0.000101468
pradc1.L	206.87	-1.71891	0.492409	-3.49082	0.000481536	0.00149232
glod5.L	569.809	0.080667	0.501048	0.160997	0.872096	0.904334
smyd5.L	901.696	-2.28733	0.551788	-4.14531	3.39352e-05	0.000134026
LOC108697494	1.24773	-1.62378	2.8715	-0.565481	0.571747	NA
LOC108719437	0.316837	-2.48136	4.99005	-0.497263	0.619004	NA
LOC108719426	0	NA	NA	NA	NA	NA
LOC108697487	2.06974	1.34092	2.1258	0.630785	0.528181	NA
XB22166507.L [provisonal]	2.60599	-1.44377	2.26038	-0.638728	0.523	0.607618
pced1a.L	203.374	2.258	0.57634	3.91782	8.93516e-05	0.000323438
adam33.L	958.93	-0.307774	0.363477	-0.84675	0.397135	0.488289
LOC121401558	1.62204	4.08511	2.8664	1.42517	0.154108	NA
dctn1.L	670.034	2.98048	0.346294	8.60678	7.51389e-18	2.0096e-16
LOC108697437	2.03046	3.55886	2.6755	1.33017	0.183463	NA
nat8.6.L	0	NA	NA	NA	NA	NA
nat8.5.L	0.755377	-2.58737	4.83334	-0.535318	0.59243	NA
nat8.3.L	0	NA	NA	NA	NA	NA
nat8.2.L	0.229259	-2.63301	4.98019	-0.528697	0.597016	NA
nat8.1.L	0	NA	NA	NA	NA	NA
cpxm1.L	0.740322	-1.82641	4.4238	-0.41286	0.679709	NA
LOC121401565	0	NA	NA	NA	NA	NA
coe3l.L	8.26222	0.420231	1.31534	0.319484	0.749359	0.806709
rnf145l.L	243.642	-2.29909	0.323188	-7.11379	1.129e-12	1.53021e-11
XB22166511.L	0.558681	-3.96898	4.8644	-0.815923	0.414544	NA
LOC108719395	0.700434	2.28495	4.36016	0.524052	0.600242	NA
lyrm2.L	6.49157	-1.05038	1.26568	-0.829889	0.406602	0.49718
hspa12b.L	16.5448	-0.18713	1.00257	-0.186651	0.851934	0.88875
LOC108719387	475.485	-0.820174	0.518922	-1.58054	0.113984	0.175308
spef1.L	6.83157	-2.82254	1.32356	-2.13253	0.0329629	0.0614598
LOC108697349	7.73458	-2.70021	1.89238	-1.42689	0.153613	0.225184
cdc25b.L	3170.8	0.41842	0.433393	0.96545	0.334319	0.426178
LOC108697345	57.7636	4.42537	0.962417	4.59819	4.26186e-06	1.99831e-05
znf638.L	2406.57	-1.37923	0.324704	-4.24765	2.16021e-05	8.88777e-05
LOC108697270	2.43011	-4.43489	3.02255	-1.46727	0.142303	NA
LOC121401575	0	NA	NA	NA	NA	NA
cyp26b1.L	0.885109	-2.2609	4.11526	-0.549393	0.582736	NA
exoc6b.L	239.997	-0.987324	0.426428	-2.31534	0.0205946	0.0411055
nagk.L	364.249	0.220563	0.409451	0.538679	0.590108	0.669036
vax2.L	34.6073	-2.33483	0.975142	-2.39435	0.0166499	0.0342163
atp6v1b1.L	186.371	-5.95274	0.504486	-11.7996	3.92128e-32	4.65952e-30
LOC108697247	0	NA	NA	NA	NA	NA
ankrd53.L	1.24488	-1.99176	3.40712	-0.584586	0.558826	NA
tex261.L	770.103	-0.299884	0.274189	-1.09371	0.274081	0.362014
siglec1.L	8.61438	-0.708071	1.0733	-0.659715	0.509437	0.595587
paip2b.L	7314.94	-0.169252	0.282438	-0.599256	0.549002	0.631316
LOC108696273	0.610567	1.52659	4.88147	0.312731	0.754485	NA
ddrgk1.L	836.5	0.875343	0.388608	2.25251	0.02429	0.0473837
LOC108697204	42.7685	3.48709	0.862093	4.04492	5.23421e-05	0.000198123
htr7l.L	0.906156	-1.2109	3.75532	-0.322447	0.747114	NA
slc4a11.L	381.998	-3.12622	0.393964	-7.9353	2.09994e-15	4.08115e-14
LOC121401606	4.73637	1.48557	1.56267	0.950662	0.341776	0.433728
LOC108696265	0.56343	1.19978	4.9057	0.244569	0.80679	NA
LOC108696259	0	NA	NA	NA	NA	NA
dnaaf9.L	129.758	2.15527	0.522245	4.12694	3.67622e-05	0.000144032
atrn.L	833.917	1.85599	0.577969	3.21124	0.00132165	0.00368607
LOC108697165	0.0862211	0.311208	4.98858	0.0623842	0.950257	NA
gfra4.L	0.449168	0	4.99758	0	1	NA
LOC108697154	14.6777	1.93963	1.08666	1.78494	0.0742705	0.122511
LOC108697143	400.371	1.81193	0.368819	4.91281	8.97816e-07	4.81233e-06
lzts3.L	510.281	0.907541	0.399191	2.27345	0.0229991	0.0452487
fastkd5.L	356.874	2.20094	0.438387	5.02054	5.1526e-07	2.88047e-06
avp.L	0.261852	0	4.99758	0	1	NA
oxt.L	0.821635	0.493164	4.97699	0.0990887	0.921068	NA
gnrh2.L	4.27047	-2.3981	1.82199	-1.3162	0.188107	0.266618
ptpre.L	752.242	0.815738	0.458821	1.7779	0.0754204	0.124125
LOC108697133	2.58196	1.17315	2.21333	0.530037	0.596087	0.674111
LOC108697132	103.158	2.50702	0.523408	4.7898	1.66946e-06	8.50685e-06
rnf24.L	115.394	-2.06785	0.584737	-3.53638	0.000405645	0.00128249
smox.L	289.918	1.18497	0.63337	1.8709	0.0613583	0.104415
LOC108697129	62.9539	-1.66891	0.881313	-1.89367	0.0582691	0.100022
LOC108719346	0	NA	NA	NA	NA	NA
adra1d.L	7.60209	-4.54117	1.72054	-2.63938	0.00830572	0.0186681
ctnna2.L	0.559447	1.20064	4.79591	0.250347	0.802319	NA
lrrtm1.L	0.229259	-2.63301	4.98019	-0.528697	0.597016	NA
suclg1.L	267.481	-0.012819	0.396416	-0.0323373	0.974203	0.981206
LOC121401646	2.92143	-0.310407	2.34382	-0.132436	0.894639	0.922466
LOC108719337	0	NA	NA	NA	NA	NA
LOC108696240	0	NA	NA	NA	NA	NA
LOC121401999	0	NA	NA	NA	NA	NA
LOC108696231	0	NA	NA	NA	NA	NA
LOC108696225	0	NA	NA	NA	NA	NA
LOC121402001	0	NA	NA	NA	NA	NA
LOC108719324	0	NA	NA	NA	NA	NA
LOC121401879	0	NA	NA	NA	NA	NA
LOC121400502	0.974657	2.28834	3.39276	0.674477	0.500008	NA
LOC108696214	0.0653049	0	4.99758	0	1	NA
LOC108719316	0	NA	NA	NA	NA	NA
LOC121401988	0	NA	NA	NA	NA	NA
LOC121401984	0	NA	NA	NA	NA	NA
LOC121400507	0	NA	NA	NA	NA	NA
LOC121401890	0.4346	2.28404	4.84226	0.471689	0.637149	NA
LOC108696206	0.343458	0.311204	4.98857	0.0623833	0.950258	NA
LOC121401656	5.82893	4.8152	1.93214	2.49216	0.0126969	0.0270589
LOC121401647	31.6677	1.97388	0.820116	2.40683	0.0160916	0.0331948
LOC121402006	1146.52	-0.626218	0.451096	-1.38822	0.165071	0.239033
LOC108696200	17.2479	2.96057	0.982001	3.01483	0.00257124	0.00665123
LOC121401948	0	NA	NA	NA	NA	NA
LOC108696185	0	NA	NA	NA	NA	NA
LOC121401768	0	NA	NA	NA	NA	NA
LOC121401761	0	NA	NA	NA	NA	NA
LOC108697125	16.3669	2.38586	1.00615	2.37127	0.017727	0.0361103
LOC121401967	0	NA	NA	NA	NA	NA
LOC121401665	0	NA	NA	NA	NA	NA
LOC121401943	0	NA	NA	NA	NA	NA
LOC121400509	0	NA	NA	NA	NA	NA
LOC121401981	0	NA	NA	NA	NA	NA
LOC121401982	0	NA	NA	NA	NA	NA
LOC121401927	0	NA	NA	NA	NA	NA
LOC121401975	0	NA	NA	NA	NA	NA
LOC121400512	0	NA	NA	NA	NA	NA
LOC121401840	0	NA	NA	NA	NA	NA
LOC121402009	0.241241	0.493187	4.97699	0.0990935	0.921064	NA
LOC121401976	0.180551	0.493179	4.97699	0.0990917	0.921065	NA
LOC108719307	0	NA	NA	NA	NA	NA
LOC121400514	0	NA	NA	NA	NA	NA
LOC108719298	0	NA	NA	NA	NA	NA
LOC121400516	0	NA	NA	NA	NA	NA
LOC121400517	0	NA	NA	NA	NA	NA
LOC121401792	0.129768	0	4.99758	0	1	NA
LOC121401719	0.269608	0	4.99758	0	1	NA
LOC121402008	0	NA	NA	NA	NA	NA
LOC121401670	0	NA	NA	NA	NA	NA
LOC121401674	0	NA	NA	NA	NA	NA
LOC121401920	0	NA	NA	NA	NA	NA
LOC108705726	0	NA	NA	NA	NA	NA
LOC121393086	0	NA	NA	NA	NA	NA
LOC108697575	1.36543	-2.4139	3.5996	-0.670603	0.502473	NA
LOC108705651	0	NA	NA	NA	NA	NA
LOC121401680	0	NA	NA	NA	NA	NA
LOC121401888	0	NA	NA	NA	NA	NA
LOC121401745	0	NA	NA	NA	NA	NA
LOC108705652	0	NA	NA	NA	NA	NA
LOC121401667	0	NA	NA	NA	NA	NA
LOC108705715	0	NA	NA	NA	NA	NA
LOC121401672	0	NA	NA	NA	NA	NA
LOC108719515	0	NA	NA	NA	NA	NA
LOC108719522	0	NA	NA	NA	NA	NA
LOC108719508	0	NA	NA	NA	NA	NA
LOC121402007	0	NA	NA	NA	NA	NA
LOC108697580	43.6129	2.33805	0.813032	2.87572	0.00403104	0.00989248
LOC121402010	5.20986	3.42235	1.94825	1.75663	0.0789808	0.129151
rpia.L	2440.16	-0.799595	0.234503	-3.40975	0.000650232	0.0019537
krcc1.L	541.722	1.14989	0.318605	3.60915	0.000307204	0.000998922
smyd1.L	388.903	-13.3968	2.07889	-6.44422	1.162e-10	1.18444e-09
LOC108696295	4.12483	1.73943	1.84275	0.943932	0.345204	0.43695
thnsl2.L	251.773	1.62623	1.548	1.05054	0.293471	0.38275
foxi4.1.L	30.4841	-1.31112	1.13344	-1.15676	0.247369	0.333555
foxi4.2.L	1296.33	4.17096	0.591891	7.04684	1.83026e-12	2.39703e-11
LOC108719539	2.02169	3.44694	2.73766	1.25908	0.208	NA
LOC108697591	382.211	0.316866	0.36745	0.862338	0.388501	0.479964
cd8b.L	0.186227	-2.48137	4.99005	-0.497264	0.619003	NA
cd8a.L	0.601713	-4.06808	4.85917	-0.837198	0.402481	NA
rmnd5a.L	1061.58	0.413557	0.30097	1.37408	0.169416	0.244061
rnf103.L	155.181	1.10989	0.624762	1.77651	0.0756497	0.124447
LOC121402011	1.18726	1.18589	3.19947	0.370652	0.710897	NA
kdm3a.L	2360.37	-0.110283	0.340305	-0.324073	0.745883	0.803865
reep1.L	24.15	-0.173603	0.852328	-0.203681	0.838603	0.878049
immt.L	833.725	1.39501	0.304552	4.58055	4.63752e-06	2.15928e-05
ptcd3.L	343.816	-1.73741	0.36454	-4.76603	1.87894e-06	9.49431e-06
LOC121396263	0.429679	1.19979	4.9057	0.24457	0.80679	NA
LOC121396269	2.08884	-5.56592	3.51165	-1.58499	0.112969	NA
LOC121396265	5.58493	-2.96073	1.56349	-1.89367	0.0582692	0.100022
mrpl35.L	118.901	-0.0280304	0.56493	-0.0496174	0.960427	0.971739
polr1a.L	1085.24	-2.0161	0.420231	-4.79759	1.60583e-06	8.2083e-06
st3gal5.L	15.3392	-0.831443	1.08208	-0.768377	0.442263	0.532033
atoh8.L	6.55346	-3.55725	1.72345	-2.06403	0.0390147	0.0710831
fgfrl1.L	393.532	-7.09249	0.487552	-14.5471	6.08986e-48	2.40116e-45
LOC121402013	0.156141	0.311204	4.98857	0.0623833	0.950258	NA
spon2.L	98.2775	6.12218	0.955195	6.40935	1.46145e-10	1.46669e-09
ctbp1.L	150.721	-1.04907	0.576421	-1.81998	0.0687626	0.114836
LOC108696303	1.77384	3.58824	3.155	1.13732	0.255405	NA
maea.L	1167.07	-0.321974	0.342318	-0.94057	0.346925	0.438595
uvssa.L	198.31	-0.717196	0.410437	-1.7474	0.0805685	0.131236
nkx1-1.L	0	NA	NA	NA	NA	NA
LOC121402014	0	NA	NA	NA	NA	NA
fam53a.L	744.671	0.0433737	0.370684	0.11701	0.906852	0.932841
slbp.L	11886.4	0.479086	0.265371	1.80535	0.0710205	0.11795
tmem129.L	250.354	0.449401	0.361644	1.24266	0.213993	0.29632
tacc3.L	237.424	-1.95404	0.537651	-3.6344	0.000278626	0.000914913
LOC108696317	5.21342	2.45636	2.13083	1.15277	0.249004	0.335269
fgfr3.L	206.217	-1.59278	0.520515	-3.06	0.00221335	0.00582092
letm1.L	538.596	1.22764	0.404728	3.03324	0.00241942	0.00629795
nsd2.L	1093.2	0.746842	0.299956	2.48984	0.0127802	0.0272092
LOC108697715	833.047	4.47937	0.526176	8.51306	1.69399e-17	4.3517e-16
nelfa.L	434.857	3.09186	0.384073	8.0502	8.26607e-16	1.67791e-14
c4orf48.L	1.29463	-0.0410214	3.08236	-0.0133085	0.989382	NA
LOC121402015	0	NA	NA	NA	NA	NA
nat8l.L	2.96441	-1.04668	1.82545	-0.573383	0.566385	0.647072
poln.L	0	NA	NA	NA	NA	NA
haus3.L	1333.62	2.56483	0.337241	7.60536	2.84121e-14	4.77011e-13
mxd4.L	6.82802	1.74621	1.52964	1.14159	0.253627	0.340248
LOC108697740	49.6451	1.83323	0.722924	2.53585	0.0112176	0.0243303
LOC108697749	66.3178	0.313685	0.551713	0.568566	0.56965	0.650176
rnf4.L	270.481	1.35075	0.382701	3.52951	0.000416332	0.00131324
fam193a.L	843.748	-1.51192	0.44612	-3.38903	0.000701394	0.00208909
tnip2.L	117.03	-1.89589	0.558268	-3.39602	0.000683732	0.00204209
LOC121400521	0	NA	NA	NA	NA	NA
sh3bp2.L	25.4109	-0.256861	0.732055	-0.350877	0.725681	0.786915
LOC108697762	0.33989	-1.05878	4.95953	-0.213483	0.83095	NA
LOC108696343	0.737186	-3.5297	4.32285	-0.816522	0.414202	NA
add1.L	507.221	-1.17157	0.345005	-3.39582	0.000684233	0.00204335
mfsd10.L	279.07	2.28883	0.536625	4.26524	1.99691e-05	8.26295e-05
LOC108719556	0	NA	NA	NA	NA	NA
LOC121401029	0.186227	-2.48137	4.99005	-0.497264	0.619003	NA
LOC108697828	7.25721	-2.3267	1.34511	-1.72975	0.0836748	0.135322
nop14.L	1908.13	-0.574866	0.246533	-2.3318	0.019711	0.0395512
LOC121402017	0.229259	-2.63301	4.98019	-0.528697	0.597016	NA
LOC121402019	155.999	0.427475	0.510611	0.837182	0.40249	0.493616
LOC121402018	0.586156	1.37075	4.89236	0.280183	0.779337	NA
cgl.2.L	336.868	-0.149332	0.395507	-0.377571	0.705749	0.769355
grk4.L	44.6375	-3.08307	0.653324	-4.71905	2.36946e-06	1.17381e-05
htt.L	397.198	1.50895	0.419639	3.59583	0.00032336	0.0010461
msantd1.L	0.830972	-4.53077	4.83889	-0.936325	0.349106	NA
LOC108697893	13.1944	3.54317	1.33106	2.66191	0.00776987	0.0176391
rgs12.L	953.457	-0.15321	0.321406	-0.476685	0.633586	0.706422
hgfac.L	0	NA	NA	NA	NA	NA
dok7.L	4.38601	-4.1771	2.02248	-2.06534	0.0388913	0.0708723
lrpap1.L	690.909	0.213474	0.363118	0.587893	0.556604	0.638281
adra2c.L	10.9251	-3.35042	1.17229	-2.85802	0.00426294	0.0103793
LOC108705981	1.7475	-4.92994	3.02506	-1.6297	0.103165	NA
LOC108697949	0.471621	-0.352167	4.88799	-0.0720474	0.942564	NA
cpz.L	0.917708	-4.45822	4.63955	-0.960916	0.336594	NA
gpr78.L	0	NA	NA	NA	NA	NA
trmt44.L	868.742	1.84441	0.358993	5.13772	2.78086e-07	1.63614e-06
acox3.L	122.756	2.48046	0.536296	4.62517	3.74292e-06	1.77838e-05
htra3.L	4.45577	-5.13925	2.20888	-2.32663	0.0199848	0.0400327
sh3tc1.L	2.31948	-5.96345	3.4391	-1.73401	0.0829156	NA
ablim2.L	3.07997	2.68916	2.16866	1.24001	0.214971	0.297333
afap1.L	201.896	0.746501	0.531793	1.40374	0.160396	0.233274
sorcs2.L	2.03249	2.59866	2.625	0.989964	0.322191	NA
LOC121396294	0	NA	NA	NA	NA	NA
LOC108698020	61.7015	1.98526	0.739227	2.68559	0.00724022	0.0166017
grpel1.L	1112.91	0.537156	0.40772	1.31746	0.187684	0.26609
tada2b.L	83.6498	-0.211046	0.510261	-0.413604	0.679164	0.746805
tbc1d14.L	1075.65	-0.646681	0.402168	-1.60799	0.107838	0.167309
kiaa0232.L	618.369	-0.679744	0.555445	-1.22378	0.221034	0.304208
s100p.L	0	NA	NA	NA	NA	NA
LOC108696360	0.172442	1.19978	4.9057	0.244569	0.80679	NA
LOC121402073	0	NA	NA	NA	NA	NA
man2b2.L	210.009	1.05201	0.408543	2.57503	0.0100232	0.0220149
ppp2r2c.L	3.96344	1.2483	1.83143	0.681598	0.495493	0.582921
LOC121402084	6.73406	1.66011	1.53564	1.08105	0.279673	0.368167
wfs1.L	332.244	0.317577	0.370954	0.856108	0.391938	0.483246
jakmip1.L	73.2503	2.87513	0.889122	3.23367	0.00122209	0.00344033
crmp1.L	3.16318	-2.08219	1.66893	-1.24762	0.212171	0.294142
evc.L	268.235	1.30763	0.464524	2.81498	0.00487797	0.0116812
evc2.L	109.918	-2.11048	0.544791	-3.87392	0.000107099	0.000382308
stk32b.L	0.978312	0	4.03754	0	1	NA
cytl1.L	0	NA	NA	NA	NA	NA
msx1.L	1927.83	-2.16982	0.511624	-4.24104	2.22491e-05	9.13661e-05
LOC108698028	1.91853	1.95781	2.54967	0.76787	0.442565	NA
stx18.L	99.0354	0.64097	0.550603	1.16412	0.244374	0.33025
nsg1.L	15.2709	-3.41938	1.22731	-2.78607	0.00533516	0.0126618
zbtb49.L	590.565	1.62015	0.352707	4.59347	4.35941e-06	2.04148e-05
lyar.L	555.252	0.366957	0.386884	0.948492	0.342879	0.434726
otop1.L	0.780462	0.96644	3.61105	0.267634	0.788981	NA
otop1.2.L	0.215989	0.311208	4.98858	0.0623842	0.950257	NA
drd5.L	0.573232	-2.4818	4.80527	-0.516475	0.605523	NA
LOC108698034	342.809	-2.9099	0.355893	-8.17635	2.92567e-16	6.29734e-15
slc2a15a.L	30.2298	2.76319	0.86618	3.19008	0.00142232	0.00393468
LOC121402096	0	NA	NA	NA	NA	NA
wdr1.L	913.155	1.06881	0.302678	3.53119	0.000413698	0.00130556
LOC121401054	0.0862211	0.311208	4.98858	0.0623842	0.950257	NA
LOC108698036	1802.94	3.30633	0.445972	7.41377	1.22755e-13	1.89747e-12
LOC121402102	0	NA	NA	NA	NA	NA
hs3st1.L	649.017	4.68458	0.474538	9.87186	5.51304e-23	2.63724e-21
LOC108698037	238.419	1.55078	0.576803	2.68858	0.00717567	0.0164696
nkx3-2.L	0.763559	-2.13275	3.78748	-0.563105	0.573364	NA
LOC121400525	0.30221	1.19979	4.9057	0.24457	0.806789	NA
bod1l1.L	874.297	4.07918	0.436849	9.33773	9.84196e-21	3.70112e-19
LOC108698040	94.172	2.76934	0.53889	5.13897	2.7625e-07	1.62644e-06
LOC108698041	1180.39	-0.631809	0.360116	-1.75446	0.0793517	0.129628
LOC108696370	0.272448	-1.08909	4.98103	-0.218648	0.826924	NA
cc2d2a.L	346.328	1.03797	0.353239	2.93844	0.00329872	0.00827957
fbxl5.L	612.108	1.23112	0.303529	4.05603	4.99135e-05	0.000189898
bst1.L	49.351	2.65971	0.638858	4.16322	3.13787e-05	0.000124819
cd38.L	21.7964	-9.20688	1.86289	-4.94227	7.72178e-07	4.19157e-06
fgfbp1.L	8.45723	-6.35705	2.26485	-2.80683	0.00500311	0.0119479
fgfbp2.L	0.369099	-2.63303	4.98019	-0.528702	0.597012	NA
proml-1	9.77547	-0.290926	1.07326	-0.271066	0.78634	0.836416
tapt1.L	181.591	2.39839	0.485952	4.93545	7.99673e-07	4.32998e-06
ldb2.S	0.13061	0	4.99758	0	1	NA
LOC121402129	0	NA	NA	NA	NA	NA
qdpr.L	84.9433	0.510461	0.467964	1.09081	0.275356	0.363404
clrn2.L	0.644745	-4.16161	4.85453	-0.857262	0.3913	NA
lap3.L	659.637	0.88038	0.268078	3.28404	0.00102331	0.0029318
XB5964984.L	92.9216	4.8081	0.921691	5.21661	1.82226e-07	1.10332e-06
med28.L	185.081	-2.17865	0.37835	-5.7583	8.49636e-09	6.50487e-08
LOC108698044	3.2698	-0.0769987	2.24366	-0.0343183	0.972623	0.980279
LOC108698045	1.30521	3.10694	2.86288	1.08525	0.277811	NA
LOC108698046	0.0862211	0.311208	4.98858	0.0623842	0.950257	NA
LOC108719586	0.496411	2.51144	4.83393	0.519544	0.603381	NA
LOC108719589	2.85277	3.62603	2.57979	1.40555	0.159858	0.232619
LOC108698048	0.475005	1.89937	4.85965	0.390844	0.695913	NA
ncapg.L	1792.12	0.545069	0.344689	1.58134	0.113801	0.175109
LOC108698049	24.3922	1.60321	0.801266	2.00084	0.0454094	0.0808656
LOC108698051	269.367	-9.77721	1.03482	-9.44818	3.44788e-21	1.34721e-19
pacrgl.L	221.882	0.199888	0.535434	0.37332	0.70891	0.772011
kcnip4.L	72.8463	3.36294	0.600285	5.60224	2.11597e-08	1.51985e-07
adgra3.L	612.368	-0.220433	0.370975	-0.594199	0.552379	0.63444
gba3.L	32.412	-1.46928	0.618733	-2.37465	0.0175654	0.0358373
ppargc1a.L	155.916	1.31367	0.627025	2.09509	0.036163	0.0665867
dhx15.L	5614.7	-1.29648	0.357449	-3.62704	0.000286692	0.000938086
sod3.L	284.053	-3.832	0.431	-8.89094	6.05943e-19	1.80394e-17
ccdc149.L	145.668	2.06088	0.405624	5.08077	3.75913e-07	2.15471e-06
lgi2.L	0.959395	-2.48213	4.68251	-0.530085	0.596053	NA
sepsecs.L	355.406	0.654546	0.319951	2.04577	0.0407788	0.0738445
pi4k2b.L	460.87	0.472572	0.408688	1.15631	0.247553	0.333734
anapc4.L	679.429	0.67515	0.32401	2.08373	0.0371843	0.0682456
slc34a2.L	105.976	0.121739	0.825702	0.147437	0.882787	0.912741
sel1l3.L	1.23268	-0.0404476	3.12849	-0.0129288	0.989685	NA
LOC108698057	163.052	0.984135	0.47474	2.073	0.0381725	0.0697591
rbpj.L	157.059	0.767302	0.447437	1.71488	0.0863669	0.138805
cckar.L	4.90499	5.04394	2.04339	2.46842	0.0135709	0.0286258
tbc1d19.L	631.445	2.25619	0.418881	5.38623	7.19525e-08	4.71286e-07
LOC108719591	783.691	2.31117	0.342791	6.74222	1.55989e-11	1.79536e-10
LOC108696386	0.997235	1.90354	3.1205	0.610013	0.541853	NA
pcdh7.L	603.539	-2.07045	0.326191	-6.34737	2.19021e-10	2.1427e-09
LOC108698061	0.687777	-4.25007	4.85042	-0.876228	0.380906	NA
nwd2.L	1.78814	-1.44778	2.54568	-0.568719	0.569547	NA
LOC108698063	55.0241	2.4358	0.558885	4.35832	1.31063e-05	5.61996e-05
rell1.L	244.686	-0.433977	0.356151	-1.21852	0.223026	0.30635
pgm2l1.L	1060.41	0.343242	0.294362	1.16605	0.243593	0.329403
LOC108698064	823.663	2.59072	0.343497	7.54221	4.62055e-14	7.54333e-13
klf3.L	21.3024	-6.6608	1.39584	-4.7719	1.82493e-06	9.25122e-06
tlr1.L	0	NA	NA	NA	NA	NA
LOC108698066	0.584346	1.77922	4.86609	0.365638	0.714636	NA
fam114a1.L	813.768	1.36611	0.384816	3.55003	0.000385191	0.00122287
LOC108698068	176.948	3.36733	0.443644	7.59016	3.195e-14	5.31608e-13
wdr19.L	60.8634	-2.47393	0.5993	-4.12803	3.6589e-05	0.000143505
rfc1.L	1491.55	1.40425	0.313768	4.47543	7.6258e-06	3.41266e-05
klb.L	233.93	-9.59133	1.23237	-7.78285	7.09102e-15	1.30042e-13
rpl9.L	1954.97	-3.13223	0.375037	-8.35179	6.7238e-17	1.58204e-15
ugdh.L	2384.53	-0.727122	0.310602	-2.34101	0.0192316	0.0387116
smim14.L	445.226	0.399878	0.304894	1.31153	0.189678	0.268552
ube2k.L	486.685	0.101917	0.320174	0.318317	0.750244	0.807395
pds5a.L	3619.65	-0.39479	0.281553	-1.40219	0.16086	0.233897
n4bp2.L	811.043	1.03321	0.631964	1.63492	0.102065	0.159829
rhoh.L	1.64264	-1.69711	2.64643	-0.64128	0.521341	NA
LOC108719593	0.129768	0	4.99758	0	1	NA
rbm47.L	96.5967	0.113556	0.523645	0.216857	0.82832	0.86987
nsun7.L	168.683	1.91713	0.454026	4.22251	2.41597e-05	9.8327e-05
apbb2.L	19.3289	0.580013	0.934242	0.620838	0.534706	0.618649
uchl1.L	457.648	2.08959	0.506406	4.12631	3.68635e-05	0.000144354
limch1.L	852.96	2.39115	0.500394	4.77854	1.76577e-06	8.96946e-06
phox2b.L	10.5283	1.37077	1.13837	1.20415	0.228531	0.312494
LOC108705778	2.00388	1.91393	2.60761	0.733978	0.462962	NA
tmem33.L	834.497	0.530758	0.256252	2.07123	0.0383372	0.0700186
slc30a9.L	146.858	-1.28201	0.55092	-2.32705	0.0199629	0.040001
bend4.L	44.1765	2.55476	0.677675	3.76989	0.000163318	0.000562918
shisa3.L	2.87048	-4.49298	2.46805	-1.82046	0.0686893	0.114743
atp8a1.L	442.006	1.11958	0.500162	2.23844	0.0251923	0.0488255
grxcr1.L	0	NA	NA	NA	NA	NA
LOC121402200	0	NA	NA	NA	NA	NA
kctd8.L	0.264993	0	4.99758	0	1	NA
yipf7.L	0.0653049	0	4.99758	0	1	NA
gnpda2.L	279.074	1.44373	0.319707	4.5158	6.30776e-06	2.86369e-05
guf1.L	283.179	-0.590169	0.411384	-1.43459	0.151403	0.222483
gabra2.L	101.537	1.68938	0.538745	3.13578	0.00171399	0.0046365
LOC121402212	2.7211	-0.433375	2.15889	-0.20074	0.840902	0.879569
LOC108698238	41.4152	3.54122	0.966223	3.66501	0.000247326	0.000821477
commd8.L	0.0653049	0	4.99758	0	1	NA
LOC121402213	0.186227	-2.48137	4.99005	-0.497264	0.619003	NA
LOC108698241	2618.95	0.333522	0.297044	1.12281	0.26152	0.348895
corin.L	48.1933	3.27291	0.924548	3.54001	0.000400109	0.00126667
nfxl1.L	750.374	0.875138	0.333974	2.62038	0.00878316	0.0196058
cnga1.L	1.18873	-2.75281	3.01993	-0.911546	0.362008	NA
nipal1.L	210.922	-6.49014	0.573695	-11.3129	1.13313e-29	1.08013e-27
tec.L	16.2538	-6.33092	1.49327	-4.23964	2.23877e-05	9.18629e-05
slain2.L	625.509	-2.01701	0.321721	-6.26943	3.62363e-10	3.43151e-09
slc10a4.L	0.13061	0	4.99758	0	1	NA
zar1.L	30.0205	1.35733	0.720842	1.88297	0.0597039	0.102048
fryl.L	710.434	-1.35132	0.433088	-3.1202	0.00180729	0.00485909
ociad1.L	506.563	1.05335	0.459748	2.29115	0.0219548	0.0434405
ociad2.L	836.681	0.565765	0.501496	1.12816	0.259254	0.346314
sgcb.L	5.39406	-1.79204	1.53476	-1.16763	0.242956	0.328746
LOC108698364	0	NA	NA	NA	NA	NA
LOC108698374	67.2683	-2.01074	0.514923	-3.90494	9.42486e-05	0.000340029
LOC121396250	1.96943	-2.44612	2.79126	-0.876352	0.380839	NA
rasl11b.L	447.589	1.85895	0.589757	3.15206	0.00162123	0.00441866
scfd2.L	127.315	2.93911	0.521469	5.63621	1.73833e-08	1.26713e-07
LOC108698423	3.8025	-1.40694	1.5838	-0.888331	0.374363	0.465814
fip1l1.L	256.911	-0.890935	0.366326	-2.43208	0.0150123	0.0312833
lnx1.L	239.299	1.96003	0.453801	4.31913	1.56648e-05	6.63591e-05
LOC108698455	582.667	-0.463865	0.288777	-1.60631	0.108206	0.167819
gsx2.L	1.65968	-5.20338	3.03703	-1.71331	0.0866556	NA
pdgfra.L	835.226	-0.514263	0.429099	-1.19847	0.230734	0.314844
kit.L	185.035	-1.13465	0.419124	-2.7072	0.00678534	0.015683
LOC108698463	19.8381	0.627181	1.30438	0.480826	0.63064	0.703767
srd5a3.L	86.2467	-0.547414	0.529237	-1.03435	0.300975	0.39052
tmem165.L	1385.64	-1.33324	0.271737	-4.90635	9.27847e-07	4.95493e-06
clock.L	124.576	0.7348	0.637945	1.15182	0.249394	0.335677
nmu.L	1.79322	2.52067	3.38459	0.744749	0.456424	NA
LOC108698490	1.0172	-4.82381	4.829	-0.998926	0.317831	NA
LOC108698504	0.241241	0.493187	4.97699	0.0990935	0.921064	NA
cep135.L	529.512	-1.16561	0.544746	-2.13973	0.0323768	0.0605536
cracd.L	1.21877	0.593622	2.99239	0.198378	0.84275	NA
aasdh.L	339.179	-2.59286	0.3061	-8.47064	2.44042e-17	6.17172e-16
paics.2.L	422.352	2.09326	0.30906	6.77299	1.26152e-11	1.46884e-10
paics.1.L	1325.46	-1.02818	0.382357	-2.68905	0.00716562	0.0164538
ppat.L	2486.55	-1.19792	0.496891	-2.41084	0.0159159	0.0328922
LOC108698546	447.351	2.35806	0.324283	7.27162	3.55199e-13	5.17834e-12
kiaa1456l.L	2.12131	-2.98845	2.59034	-1.15369	0.248627	NA
LOC108698560	499.425	1.07973	0.361155	2.98965	0.00279297	0.00715086
LOC108698577	0.364374	1.19979	4.9057	0.24457	0.806789	NA
sgcz.L	0.0862211	0.311208	4.98858	0.0623842	0.950257	NA
LOC121402375	0	NA	NA	NA	NA	NA
tusc3.L	3.60617	4.10742	2.21348	1.85563	0.0635057	0.10734
LOC108719597	0.302563	0.493165	4.97699	0.0990889	0.921068	NA
fgf20.L	144.42	-1.60626	0.505046	-3.18042	0.00147062	0.00405229
micu3.L	4.19937	-2.81325	1.69168	-1.66299	0.0963141	0.152234
LOC121401095	0.191932	0	4.99758	0	1	NA
zdhhc2.L	55.9108	0.695234	0.555196	1.25223	0.210485	0.292387
LOC108696426	2.27645	-5.93628	3.35508	-1.76934	0.0768373	NA
LOC108696408	0.830972	-4.53077	4.83889	-0.936325	0.349106	NA
vps37a.L	231.054	1.03755	0.581269	1.78498	0.0742645	0.122509
LOC121400544	0.706983	-2.48136	4.99005	-0.497262	0.619004	NA
LOC108696420	0.0699199	0	4.99758	0	1	NA
LOC108703974	0.0653049	0	4.99758	0	1	NA
mtmr7.L	31.3739	1.54528	0.652792	2.36718	0.017924	0.0364375
slc7a2.1.L	70.4231	-9.37432	1.76591	-5.3085	1.10533e-07	6.97311e-07
pdgfrl.L	1.40805	-1.19346	3.32141	-0.359325	0.719352	NA
mtus1.L	458.984	0.251556	0.639404	0.393423	0.694007	0.759309
LOC108719598	0	NA	NA	NA	NA	NA
fgl1a.L	1.09642	0.315297	3.9223	0.0803858	0.93593	NA
pcm1.L	2790.06	0.41009	0.427936	0.958298	0.337912	0.429726
gtf2e1.2.L	146.097	1.8912	0.443024	4.26885	1.96484e-05	8.14708e-05
asah1.L	205.316	1.41718	0.509846	2.77963	0.00544213	0.0128898
frg1.L	646.821	0.505811	0.31801	1.59055	0.111711	0.172372
LOC121401108	0.0699199	0	4.99758	0	1	NA
LOC108719599	1756.08	-1.21703	0.287066	-4.23955	2.23966e-05	9.18849e-05
mtnr1a.L	0	NA	NA	NA	NA	NA
klkb1.L	0	NA	NA	NA	NA	NA
cyp4v4	3.19535	1.85675	2.14423	0.865931	0.386528	0.478123
cyp4v2.1.L	770.959	3.15083	0.329376	9.56604	1.11078e-21	4.62493e-20
fam149a.L	86.586	1.17197	0.656549	1.78505	0.0742537	0.122499
LOC108698653	1.58823	-1.90063	2.92898	-0.648904	0.5164	NA
LOC108698663	57.898	3.90062	0.822672	4.7414	2.12243e-06	1.06113e-05
pdlim3.L	3.20436	-1.97095	1.72317	-1.14379	0.25271	0.339262
c4orf47.L	77.968	-1.71792	0.525557	-3.26876	0.00108019	0.00308088
ufsp2.L	86.2406	-0.858094	0.427827	-2.0057	0.044888	0.0801126
ankrd37.L	35.8546	-2.39055	1.02781	-2.32588	0.0200252	0.0400981
snx25.L	295.838	3.75438	0.516422	7.26999	3.59501e-13	5.23471e-12
cfap97.L	208.841	1.53577	0.758908	2.02366	0.0430052	0.0772929
slc25a4.L	3.33794	2.85629	2.39704	1.19159	0.233422	0.317995
LOC108698714	212.033	-0.318358	0.370839	-0.858481	0.390627	0.482087
helt.L	25.3131	-0.245453	0.809282	-0.303297	0.761663	0.816308
acsl1.L	2831.09	-1.1255	0.398648	-2.82329	0.00475335	0.0114195
cenpu.L	137.92	0.821091	0.638415	1.28614	0.198395	0.278439
LOC108698746	112.993	-0.26398	0.448771	-0.588228	0.556379	0.638107
LOC108696427	0.726647	-1.97932	3.79778	-0.521179	0.602242	NA
LOC108698755	3.42159	-0.962772	1.79768	-0.535564	0.59226	0.670978
primpol.L	189.283	0.415989	0.497519	0.836127	0.403083	0.494132
casp3.2.L	499.792	1.2094	0.456851	2.64726	0.00811478	0.0183144
irf2.L	248.152	-0.188657	0.571965	-0.32984	0.741521	0.800357
enpp6.L	305.99	3.39626	0.492536	6.89545	5.36928e-12	6.59079e-11
stox2.L	237.849	0.0860656	0.541734	0.158871	0.873771	0.905757
trappc11.L	409.226	1.03377	0.346568	2.98287	0.00285555	0.00728886
rwdd4.L	486.277	0.479393	0.394544	1.21506	0.224345	0.307788
LOC108698788	76.9646	-3.59587	0.827506	-4.34544	1.38998e-05	5.92976e-05
ing2.L	747.55	0.386077	0.364232	1.05998	0.289156	0.378392
LOC108698801	8.70694	-2.39957	1.14463	-2.09638	0.0360486	0.0663948
cdkn2aip.L	1023.65	0.211344	0.293747	0.719477	0.471847	0.560475
cldn22.L	0	NA	NA	NA	NA	NA
LOC108696436	0.191932	0	4.99758	0	1	NA
wwc2.L	122.682	-0.529304	0.590257	-0.896734	0.369861	0.461404
dctd.L	1015.65	1.84155	0.320915	5.73841	9.55684e-09	7.26846e-08
LOC108698820	90.1553	-0.428702	0.656818	-0.652696	0.513952	0.599569
LOC108698837	11.7457	4.30742	1.71698	2.50872	0.0121171	0.0259825
LOC108698854	48.8758	-3.6803	0.638103	-5.76757	8.0424e-09	6.17731e-08
aga.L	39.5754	2.2233	0.665949	3.33855	0.000842163	0.00246575
neil3.L	1275.03	2.05043	0.271538	7.55115	4.31441e-14	7.07906e-13
vegfc.L	2.62243	-0.108535	1.84645	-0.0587803	0.953127	0.966745
spcs3.L	1766	0.659117	0.270632	2.43547	0.0148723	0.0310314
asb5.L	0.730966	-2.76933	4.84526	-0.571553	0.567625	NA
spata4.L	35.249	-2.03532	0.690075	-2.94943	0.00318366	0.00801861
wdr17.L	2.61991	-0.633645	1.85831	-0.340979	0.73312	0.79323
gpm6a.L	15.9816	-7.15369	1.77199	-4.0371	5.41153e-05	0.00020433
glra3.L	1.22174	-2.62418	3.22587	-0.813479	0.415944	NA
hpgd.L	424.517	0.0713012	0.440083	0.162018	0.871292	0.903872
cep44.L	151.046	-0.605943	0.644096	-0.940766	0.346825	0.438511
fbxo8.L	29.7138	0.391986	0.791759	0.495082	0.620542	0.6949
hand2.L	25.8209	1.56961	0.871582	1.80088	0.0717225	0.118866
scrg1.L	0	NA	NA	NA	NA	NA
sap30.L	800.412	0.784374	0.362109	2.16613	0.0303016	0.0571445
hmgb2.L	48191.9	-1.94472	0.313821	-6.19692	5.75804e-10	5.27054e-09
galnt7.L	318.609	0.542164	0.384854	1.40875	0.158908	0.231551
LOC108698938	112.944	4.97497	0.7035	7.07174	1.52998e-12	2.02567e-11
aadat.L	0.408763	0.3112	4.98857	0.0623826	0.950258	NA
mfap3l.L	112.812	1.8883	0.574431	3.28726	0.00101166	0.00290259
hpf1.L	468.797	0.250717	0.291202	0.860973	0.389253	0.480619
clcn3.L	849.592	0.348045	0.290224	1.19923	0.230438	0.314572
nek1.L	310.116	0.54851	0.518686	1.0575	0.290283	0.379581
sh3rf1.L	468.086	-2.44064	0.370409	-6.58903	4.42703e-11	4.77829e-10
cbr4.L	37.0081	3.5001	1.00866	3.47005	0.000520357	0.00160062
palld.L	310.655	-0.933969	0.594778	-1.57028	0.11635	0.178423
LOC108719602	0.372454	-3.38857	4.9033	-0.691078	0.489516	NA
LOC108719603	38.2653	0.893849	0.752493	1.18785	0.234892	0.319663
LOC108699095	552.603	3.01573	0.419202	7.19397	6.29352e-13	8.84321e-12
anxa10.L	1.96451	-5.56588	3.48985	-1.59488	0.11074	NA
LOC108704954	22.0482	2.6763	1.02123	2.62067	0.00877567	0.0195907
tll1.L	1071.02	-2.27409	0.651348	-3.49135	0.000480578	0.00148988
cpe.L	187.747	-2.00635	0.367875	-5.4539	4.92778e-08	3.32389e-07
msmo1.L	12.8359	-0.155593	1.33463	-0.116582	0.907191	0.933079
LOC108704958	100.74	-2.57353	0.44083	-5.83792	5.28558e-09	4.18329e-08
tmem192.L	385.72	1.88109	0.338426	5.55835	2.72333e-08	1.91694e-07
LOC108704959	2541.09	-0.351199	0.306246	-1.14679	0.251469	0.337893
LOC121402798	0.591422	-1.9596	4.65545	-0.420927	0.673808	NA
tma16.L	1149.93	0.176734	0.299064	0.590959	0.554548	0.636421
LOC121402799	62.5453	2.93497	0.599025	4.89958	9.60401e-07	5.11617e-06
npy5r.L	1.85567	-0.147849	2.28561	-0.0646868	0.948423	NA
npy2r.L	0.396445	0	4.99758	0	1	NA
naf1.L	1980.2	0.675382	0.254429	2.6545	0.0079426	0.0179793
LOC108699149	4.15559	4.05845	2.2075	1.83848	0.0659916	0.110901
fstl5.L	0.110631	0.493165	4.97699	0.0990889	0.921068	NA
rapgef2.L	852.406	-1.92002	0.339877	-5.64915	1.61246e-08	1.181e-07
c4orf45.L	3.1848	-0.392011	2.02539	-0.193548	0.84653	0.884247
fnip2.L	445.383	-0.745016	0.460135	-1.61912	0.10542	0.164293
ppid.L	949.818	-1.4979	0.268637	-5.57592	2.46228e-08	1.74927e-07
etfdh.L	479.556	-0.774702	0.29716	-2.60702	0.00913341	0.0202728
LOC108699191	683.287	0.782163	0.373883	2.092	0.0364388	0.0670044
LOC121402800	3.11136	-2.76905	2.00538	-1.38081	0.167339	0.241584
rxfp1.L	0.644745	-4.16161	4.85453	-0.857262	0.3913	NA
trnak-cuu_1	0	NA	NA	NA	NA	NA
tmem144.L	139.922	1.50029	0.4208	3.56534	0.000363388	0.00116044
gask1b.L	84.0257	-0.983801	0.538691	-1.82628	0.0678079	0.113469
LOC108699208	65.1796	-5.7307	0.779607	-7.35075	1.97094e-13	2.98369e-12
LOC121402801	2.01629	-3.04997	2.32055	-1.31433	0.188735	NA
glrb.L	5.31858	-0.882147	1.55463	-0.567432	0.570421	0.650827
pdgfc.L	0	NA	NA	NA	NA	NA
ctso.L	79.7056	-0.656205	0.437048	-1.50145	0.133239	0.199878
tdo2.L	0.458518	-3.66113	4.88313	-0.749751	0.453404	NA
gucy1b1.L	0.175936	0.493178	4.97699	0.0990916	0.921066	NA
LOC108719606	0.251532	-2.48137	4.99005	-0.497263	0.619004	NA
map9.L	70.9371	-1.78804	0.520415	-3.4358	0.000590802	0.00179315
LOC108699267	5.91501	3.14214	1.75651	1.78885	0.0736388	0.121631
rbm46.L	63.5489	1.43003	0.613373	2.33142	0.0197314	0.039583
lrat.L	220.482	-6.3018	0.542321	-11.62	3.25962e-31	3.47644e-29
LOC108699284	0	NA	NA	NA	NA	NA
LOC108699289	214.643	1.58634	0.362099	4.38096	1.18156e-05	5.11183e-05
fgg.L	0.633982	1.20166	4.67321	0.257138	0.797072	NA
fga.L	0	NA	NA	NA	NA	NA
fgb.L	0.221446	0.3112	4.98857	0.0623826	0.950258	NA
plrg1.L	315.454	2.56936	0.426476	6.02463	1.69499e-09	1.45479e-08
dchs2.L	9.74572	2.5189	1.23194	2.04467	0.0408872	0.0739871
sfrp2.L	704.109	-1.364	0.323613	-4.21491	2.49878e-05	0.000101239
LOC108699311	0.647557	0.366414	3.87969	0.0944441	0.924756	NA
LOC108699322	1.6126	3.3714	3.20928	1.05052	0.29348	NA
tmem131l.L	655.639	-0.362206	0.464571	-0.779657	0.435593	0.525494
LOC108699336	145.844	2.71354	0.445224	6.09478	1.09586e-09	9.66045e-09
trim2.L	153.853	2.82683	0.746613	3.78621	0.000152961	0.000530522
fhdc1.L	1195.16	1.06196	0.472591	2.2471	0.0246334	0.047935
arfip1.L	250.909	2.11161	0.38813	5.44046	5.31424e-08	3.56699e-07
LOC108699363	1.82438	-1.2649	2.59401	-0.487624	0.625816	NA
LOC121402803	0	NA	NA	NA	NA	NA
LOC121402802	0	NA	NA	NA	NA	NA
LOC108719609	0.755746	-0.192323	3.84777	-0.0499831	0.960136	NA
fbxw7.L	500.517	-1.94688	0.31345	-6.21115	5.25993e-10	4.84528e-09
LOC121402805	0	NA	NA	NA	NA	NA
LOC121401124	0.129768	0	4.99758	0	1	NA
gatb.L	399.986	0.690673	0.337751	2.04492	0.040863	0.0739587
fhip1a.L	148.362	0.316771	0.530205	0.59745	0.550207	0.632394
sh3d19.L	357.013	0.641781	0.399494	1.60648	0.108168	0.16777
rps3a.L	2061.04	-3.75831	0.315716	-11.9041	1.12658e-32	1.40273e-30
LOC121396359	4.12298	-1.78624	1.72107	-1.03787	0.299332	0.388815
LOC121396358	10.8562	-3.00508	1.14371	-2.62749	0.00860168	0.0192486
LOC108699406	370.095	2.57461	0.356373	7.22449	5.02998e-13	7.17628e-12
mab21l2.L	90.9881	-1.71085	0.691583	-2.47382	0.0133678	0.0282477
LOC108699412	53.0924	-4.86496	0.993533	-4.89663	9.74947e-07	5.18835e-06
nr3c2.L	119.16	4.13155	0.773373	5.34225	9.17986e-08	5.88683e-07
arhgap10.L	496.414	1.24246	0.297803	4.1721	3.01809e-05	0.00012046
prmt9.L	231.365	0.799802	0.38571	2.07358	0.0381182	0.0696789
tmem184c.L	1031.22	2.055	0.303776	6.76486	1.3344e-11	1.54747e-10
ednra.L	23.266	-1.58795	0.885876	-1.79252	0.0730495	0.120804
LOC121400560	0.221263	1.52659	4.88147	0.312731	0.754485	NA
ttc29.L	7.65951	-4.44693	1.59178	-2.79368	0.00521118	0.012397
LOC121401131	0.13061	0	4.99758	0	1	NA
LOC108696455	2.37542	1.7937	3.39405	0.528484	0.597163	NA
slc10a7.L	463.39	1.29132	0.360023	3.58676	0.000334811	0.00107938
LOC108719610	0.966069	1.31623	3.44753	0.381789	0.702618	NA
lsm6.L	983.679	-0.320908	0.31509	-1.01847	0.308456	0.398716
znf827.L	46.9646	-1.05004	0.701653	-1.49652	0.134519	0.201379
LOC108699458	9.22313	-6.50197	2.09748	-3.0999	0.00193584	0.00516734
mmaa.L	203.145	3.30736	0.548982	6.02453	1.69605e-09	1.4552e-08
smad1.L	2856.16	0.758869	0.392343	1.9342	0.0530889	0.0923423
LOC121402856	0.0653049	0	4.99758	0	1	NA
LOC121402858	0	NA	NA	NA	NA	NA
LOC121401138	0	NA	NA	NA	NA	NA
LOC121401146	0	NA	NA	NA	NA	NA
LOC108699469	0	NA	NA	NA	NA	NA
hhip.L	43.7308	0.0245825	0.814425	0.0301839	0.97592	0.982371
anapc10.L	218.961	0.334931	0.464968	0.720331	0.471321	0.559927
abce1.L	4950.47	-0.560917	0.257141	-2.18136	0.0291567	0.0553385
otud4.L	528.223	0.437533	0.349251	1.25278	0.210288	0.292246
LOC121402882	0.372454	-3.38857	4.9033	-0.691078	0.489516	NA
LOC108710142	0.259536	0	4.99758	0	1	NA
LOC121402883	0	NA	NA	NA	NA	NA
frem3.L	73.2284	-1.31539	0.745286	-1.76495	0.0775722	0.127152
smarca5.L	3165.92	-0.0948309	0.513233	-0.184772	0.853408	0.889931
LOC108705452	0.442892	1.19978	4.9057	0.244569	0.80679	NA
gab1.L	789.158	-0.583873	0.410583	-1.42206	0.155009	0.226937
LOC121402890	0	NA	NA	NA	NA	NA
LOC121402887	0	NA	NA	NA	NA	NA
LOC121400564	0	NA	NA	NA	NA	NA
LOC121400575	0	NA	NA	NA	NA	NA
LOC121400576	0	NA	NA	NA	NA	NA
LOC121402895	0.658363	-1.9977	4.5488	-0.439171	0.660537	NA
LOC121402896	0	NA	NA	NA	NA	NA
LOC121402894	0	NA	NA	NA	NA	NA
usp38.L	407.28	2.5735	0.417802	6.15962	7.29209e-10	6.58896e-09
LOC108699497	6.8336	-0.0383346	1.50799	-0.0254209	0.979719	0.985361
LOC108719613	1.48602	-1.28701	2.97311	-0.432884	0.665099	NA
rnf150.L	15.567	-0.350501	0.924745	-0.379024	0.70467	0.768487
LOC108699540	50.9206	2.06421	0.813073	2.53877	0.0111242	0.0241639
ucp1.L	0.151526	0.311203	4.98857	0.0623832	0.950258	NA
elmod2.L	256.682	-1.59757	0.472458	-3.3814	0.000721166	0.0021421
LOC108699553	16.4867	-2.181	0.947105	-2.30281	0.0212896	0.0423044
mgat4d.L	166.972	3.51315	0.583996	6.01572	1.79094e-09	1.52956e-08
clgn.L	72.1594	0.77956	0.627294	1.24273	0.213966	0.296298
LOC108699619	229.571	-1.40459	0.390381	-3.59801	0.000320667	0.00103816
LOC121401160	0	NA	NA	NA	NA	NA
LOC121401167	0	NA	NA	NA	NA	NA
LOC108699635	8.64812	-3.93859	1.46043	-2.69688	0.00699928	0.0161245
LOC108699640	5.44375	1.07004	1.49088	0.717724	0.472927	0.561373
LOC108699671	0.421191	-2.63301	4.98019	-0.528697	0.597016	NA
mgst2.L	12.0894	-1.60558	1.15776	-1.38679	0.165506	0.239568
setd7.L	435.942	2.81572	0.509104	5.53074	3.18879e-08	2.21995e-07
XB5734924.L	1151.25	6.13786	0.401329	15.2938	8.40695e-53	4.86164e-50
rab33b.L	234.255	2.73464	0.493691	5.53918	3.03891e-08	2.12072e-07
LOC108719615	0.507412	-1.24073	4.97116	-0.249586	0.802907	NA
naa16.L	2438.5	0.256068	0.248701	1.02962	0.303188	0.392941
noct.L	14.8348	-3.12276	0.973171	-3.20885	0.00133268	0.0037119
elf2.L	379.489	-1.84047	0.279897	-6.57551	4.84856e-11	5.20091e-10
mgarp.L	725.567	-0.934248	0.347503	-2.68846	0.00717828	0.0164742
slc7a11.L	0.110631	0.493165	4.97699	0.0990889	0.921068	NA
LOC121401171	0	NA	NA	NA	NA	NA
pcdh18.L	374.102	-0.552961	0.416868	-1.32646	0.184686	0.262556
pcdh10.L	126.479	-1.46505	0.553816	-2.64538	0.00815999	0.0183964
LOC108699675	10.8625	6.05767	1.79584	3.37317	0.000743075	0.00220315
LOC108699676	16.3854	0.304708	0.929148	0.327943	0.742955	0.801538
LOC108699678	1.95485	-1.81805	2.33001	-0.780273	0.43523	NA
sclt1.L	228.419	2.42105	0.60261	4.0176	5.87933e-05	0.000220236
jade1.L	36.8012	-2.77305	0.680924	-4.07248	4.65157e-05	0.000178474
pgrmc2.L	1393.93	-0.311877	0.289814	-1.07613	0.281871	0.370591
larp1b.L	1352.31	0.279135	0.275953	1.01153	0.311763	0.402311
abhd18.L	145.721	-1.50086	0.59985	-2.50206	0.0123473	0.0264173
mfsd8.L	251.312	-0.788865	0.391417	-2.01541	0.043862	0.0785669
plk4.L	721.157	-1.25991	0.357774	-3.52152	0.000429087	0.00134954
LOC100158321	196.473	0.0318863	0.490777	0.064971	0.948197	0.962849
LOC108699680	0.934308	0.764229	3.43902	0.222223	0.82414	NA
LOC108699681	12.4176	-5.17523	1.52404	-3.39573	0.000684451	0.00204377
fat4.L	16.6201	-2.89402	1.15888	-2.49726	0.0125156	0.0267246
ankrd50.L	408.998	-1.15112	0.526708	-2.18551	0.0288517	0.0548595
spry1.L	810.96	-1.68107	0.367038	-4.58008	4.64796e-06	2.16375e-05
spata5.L	186.056	0.269748	0.347624	0.775977	0.437763	0.52772
nudt6.L	102.389	-1.95987	0.554986	-3.53139	0.000413389	0.00130474
fgf2	21.303	-1.8234	0.846265	-2.15464	0.0311898	0.0585988
bbs12.L	127.557	0.679343	0.564535	1.20337	0.228835	0.312854
cetn4.L	790.873	-1.57764	0.443179	-3.55984	0.000371085	0.00118169
adad1.L	37.6531	1.43811	0.770948	1.86537	0.0621293	0.105438
LOC108710144	0.831307	-0.565949	4.07663	-0.138828	0.889586	NA
kiaa1109.L	2208.56	0.496869	0.287325	1.72929	0.0837569	0.135388
LOC108719617	1.31925	-3.53609	3.54913	-0.996326	0.319092	NA
bbs7.L	249.795	-1.29218	0.471743	-2.73917	0.00615948	0.0143937
LOC108710145	16.2909	0.80227	0.851143	0.94258	0.345896	0.437651
ccna2.L	5897.73	1.78878	0.405032	4.4164	1.00357e-05	4.39588e-05
exosc9.L	964.066	-0.388277	0.270098	-1.43754	0.150563	0.221534
anxa5.L	483.038	0.206887	0.39609	0.522323	0.601445	0.678814
cyp2u1.L	21.6379	-1.69502	0.948889	-1.78632	0.0740475	0.122229
hadh.L	983.795	0.423055	0.366947	1.1529	0.24895	0.335218
lef1.L	680.26	-2.35162	0.45366	-5.18367	2.17558e-07	1.2997e-06
LOC121402968	0	NA	NA	NA	NA	NA
LOC121402970	0	NA	NA	NA	NA	NA
rpl34.L	1595.55	-3.29971	0.333828	-9.88445	4.86243e-23	2.34759e-21
LOC108719618	0.195073	0	4.99758	0	1	NA
LOC121402971	0	NA	NA	NA	NA	NA
LOC108696485	0	NA	NA	NA	NA	NA
LOC108705587	0	NA	NA	NA	NA	NA
LOC121402972	0	NA	NA	NA	NA	NA
LOC108705586	0.359027	-2.63301	4.98019	-0.528697	0.597016	NA
ostc.L	1396.25	-2.20095	0.469016	-4.69269	2.69633e-06	1.32016e-05
etnppl.L	1.81561	-4.02022	3.55974	-1.12936	0.258747	NA
LOC108710147	14.5959	2.05149	1.16334	1.76345	0.0778249	0.127486
sec24b.L	1118.67	0.398216	0.468074	0.850753	0.394907	0.486024
mcub.L	677.379	0.23565	0.387498	0.608133	0.543099	0.626244
trnav-uac	0.13061	0	4.99758	0	1	NA
pigy.L	36.0078	0.0184384	0.592784	0.0311047	0.975186	0.981839
fam241a.L	48.1908	0.340577	0.575548	0.591744	0.554022	0.636008
LOC121402985	1.34137	-4.98861	4.23042	-1.17922	0.23831	NA
pitx2.L	86.9846	-2.74315	0.712196	-3.85168	0.000117312	0.00041553
enpep.L	1.73458	-5.47677	4.55584	-1.20214	0.229308	NA
LOC108710167	3.22365	0.977636	1.79963	0.543241	0.586964	0.666371
egf.L	0.586156	1.37075	4.89236	0.280183	0.779337	NA
lrit3.L	21.975	-0.426025	0.745878	-0.571173	0.567883	0.648414
gar1.L	2330.48	-2.33825	0.29268	-7.98908	1.35949e-15	2.6883e-14
LOC121403002	3.8272	1.84563	1.83109	1.00794	0.313485	0.404172
LOC121403005	0.344885	2.19133	4.84604	0.452191	0.651132	NA
cfi.L	33.6624	-8.31432	1.58956	-5.23058	1.68975e-07	1.02763e-06
casp6.L	423.919	-0.486226	0.313816	-1.5494	0.121286	0.184477
ap1ar.L	196.461	0.610753	0.390722	1.56314	0.11802	0.180466
tifa.L	150.06	0.657595	0.455367	1.4441	0.148711	0.219208
alpk1.L	76.2955	1.70233	0.720337	2.36324	0.018116	0.0367732
LOC121403011	0.196852	1.37075	4.89236	0.280183	0.779337	NA
neurog2.L	97.3824	-1.75178	0.606514	-2.88827	0.00387368	0.00954139
LOC108710251	194.077	0.729932	0.634269	1.15083	0.249804	0.33609
larp7.L	2917.38	1.04614	0.259521	4.03105	5.5529e-05	0.000208971
LOC108710290	328.637	0.439611	0.401019	1.09624	0.272975	0.360865
LOC121403019	1.60098	-0.268041	2.85759	-0.0937997	0.925268	NA
LOC121403020	12.8028	4.43294	1.69221	2.61962	0.00880282	0.0196362
LOC108710308	13.0241	-3.14024	1.24206	-2.52825	0.0114631	0.0247826
camk2d.L	26.2697	-5.38716	1.15704	-4.65599	3.22421e-06	1.55521e-05
arsj.L	5.2743	-7.12155	2.51723	-2.82912	0.00466755	0.0112383
ugt8.L	0.758005	1.24194	4.80723	0.258348	0.796138	NA
LOC108719619	0	NA	NA	NA	NA	NA
ndst4.L	0.0862211	0.311208	4.98858	0.0623842	0.950257	NA
LOC108710474	0.680456	2.65916	4.32334	0.61507	0.538508	NA
LOC108710484	516.542	-1.73869	0.407169	-4.2702	1.95295e-05	8.10034e-05
LOC121396389	12.7954	-1.65269	1.00356	-1.64684	0.0995909	0.156633
LOC121396242	46.1918	-0.879035	0.592426	-1.48379	0.137865	0.205773
prss12.L	1.69779	-1.06693	2.43243	-0.438629	0.66093	NA
LOC121403056	0.0862211	0.311208	4.98858	0.0623842	0.950257	NA
sec24d.L	172.897	-5.4031	0.613888	-8.80144	1.35077e-18	3.85851e-17
LOC108719620	4.15612	-0.924337	1.7032	-0.542706	0.587332	0.666648
myoz2.L	2.1823	2.40193	2.46998	0.972446	0.330829	NA
usp53.L	553.322	2.45085	0.410597	5.96898	2.38737e-09	1.99315e-08
LOC121400595	0.229259	-2.63301	4.98019	-0.528697	0.597016	NA
LOC108710532	559.834	-2.35599	0.406513	-5.79561	6.80719e-09	5.2926e-08
fabp2.L	0	NA	NA	NA	NA	NA
LOC108710540	12.4843	-5.39923	1.52475	-3.54107	0.000398506	0.00126252
mad2l1.L	182.118	1.4946	0.459174	3.25497	0.00113405	0.00322001
LOC108710550	2.02101	-5.43449	3.2287	-1.68318	0.0923395	NA
LOC108710560	1.46775	-5.20588	3.4502	-1.50886	0.131333	NA
prdm5.L	54.6303	-3.16575	0.634781	-4.98716	6.12738e-07	3.38613e-06
ndnf.L	81.2405	-3.97453	0.63189	-6.2899	3.17664e-10	3.03695e-09
LOC121403065	0.229259	-2.63301	4.98019	-0.528697	0.597016	NA
tnip3.L	0.671662	-1.0596	4.69155	-0.225853	0.821316	NA
qrfpr.L	5.97741	0.236505	1.32153	0.178963	0.857967	0.893568
sgms2.L	14.4189	-0.578567	1.07166	-0.53988	0.58928	0.668359
papss1.L	932.467	1.49789	0.455673	3.28721	0.00101185	0.0029028
dkk2.L	3.08607	-1.74762	2.13836	-0.817269	0.413775	0.504387
aimp1.L	116.048	0.0620494	0.380681	0.162996	0.870522	0.903397
tbck.L	324.267	2.24212	0.317239	7.0676	1.57631e-12	2.08076e-11
LOC108710635	0	NA	NA	NA	NA	NA
npnt.L	6.89039	-3.83663	1.70586	-2.24908	0.0245074	0.047754
gstcd.L	333.22	1.88517	0.375586	5.01928	5.18664e-07	2.89701e-06
ints12.L	286.384	1.17111	0.338005	3.46478	0.000530659	0.00162904
arhgef38.L	155.457	-0.950696	0.666784	-1.42579	0.153928	0.225583
ppa1.L	774.191	2.26459	0.344088	6.58145	4.65891e-11	5.0078e-10
tet2.L	50.0289	-2.90516	1.04006	-2.79325	0.00521806	0.0124099
cxxc4.L	8.26333	-1.58433	1.20318	-1.31678	0.187911	0.266355
LOC121401185	0	NA	NA	NA	NA	NA
tacr3.L	0.195915	0	4.99758	0	1	NA
LOC108696509	0	NA	NA	NA	NA	NA
LOC108705855	0.175936	0.493178	4.97699	0.0990916	0.921066	NA
cenpe.L	683.979	-0.597403	0.602502	-0.991538	0.321423	0.412669
dpy19l1.L	909.006	0.923824	0.400227	2.30825	0.0209851	0.041792
LOC121403090	0.861249	-4.06816	4.78395	-0.850377	0.395115	NA
bdh2.L	11.3136	1.37175	1.193	1.14983	0.250214	0.336602
slc9b2.L	2.45595	-4.36576	2.49491	-1.74987	0.0801413	NA
cisd2.L	282.731	1.25823	0.310862	4.04756	5.17538e-05	0.000196182
ube2d3.L	2597.92	-0.874132	0.418028	-2.09109	0.0365202	0.0671351
manba.L	49.1549	2.40678	0.809584	2.97286	0.00295035	0.00750406
nfkb1.L	21.9617	0.214643	0.812875	0.264054	0.791738	0.840612
slc39a8.L	54.5246	-3.01815	0.606511	-4.97625	6.48273e-07	3.56133e-06
LOC108710809	14.6581	-1.85947	0.962856	-1.9312	0.0534578	0.0929031
LOC108719622	0.851285	-1.20603	4.18309	-0.288311	0.773109	NA
ppp3ca.L	743.444	2.09799	0.452469	4.63677	3.53902e-06	1.69077e-05
LOC121400605	0	NA	NA	NA	NA	NA
LOC121403102	1.17477	-1.08868	4.14655	-0.262551	0.792897	NA
h2az1.L	21697.1	-1.30452	0.408929	-3.19008	0.00142234	0.00393468
dnajb14.L	302.334	3.19822	0.630737	5.0706	3.96555e-07	2.26058e-06
lamtor3.L	138.355	0.469996	0.454799	1.03341	0.30141	0.390928
mttp.1.L	3.10021	0.891507	1.92155	0.463951	0.642683	0.714815
LOC108710833	9.53672	-0.189162	1.09819	-0.172249	0.863242	0.897812
LOC121401195	0.196852	1.37075	4.89236	0.280183	0.779337	NA
dapp1.L	0.587928	-1.24925	4.79847	-0.260344	0.794598	NA
LOC108710849	4.57005	4.83061	2.15116	2.24559	0.0247303	0.0480949
MGC83376	0.519072	0	4.99758	0	1	NA
adh1b.L	0	NA	NA	NA	NA	NA
adh4.L	0.480982	0.3112	4.98857	0.0623825	0.950258	NA
adh1-a	4.22683	-6.87526	3.09123	-2.22412	0.0261407	0.0503597
LOC108719623	0.229259	-2.63301	4.98019	-0.528697	0.597016	NA
LOC121403107	9.20559	-4.69231	1.49549	-3.13765	0.00170307	0.00461128
adh5.L	400.523	0.462122	0.454028	1.01783	0.30876	0.39901
metap1.L	1622.85	1.91944	0.283583	6.76852	1.3011e-11	1.51154e-10
eif4e.L	1666.02	-1.88973	0.366513	-5.15597	2.52321e-07	1.49468e-06
LOC121396244	14.7625	-1.75648	0.938296	-1.87199	0.0612077	0.104194
tspan5.L	22.8367	-1.47998	0.779828	-1.89783	0.0577191	0.099209
rap1gds1.L	397.848	0.801186	0.295621	2.71018	0.00672467	0.0155649
LOC108710879	0.698917	-2.08689	4.86206	-0.42922	0.667763	NA
unc5c.L	7.81877	-2.68232	1.43069	-1.87484	0.0608142	0.103653
bmpr1b.L	146.928	-4.27681	0.493787	-8.66125	4.66633e-18	1.26756e-16
pdlim5.L	191.624	-3.5903	0.937689	-3.82888	0.00012873	0.000452083
XB5957215.L	1.52949	2.8468	2.74433	1.03734	0.299577	NA
hpgds.L	39.2448	0.440618	0.59117	0.745332	0.456071	0.545595
LOC108710927	407.062	-0.690124	0.484983	-1.42299	0.15474	0.226593
atoh1.L	48.6936	2.40107	0.694018	3.45967	0.000540845	0.00165718
grid2.S	72.2042	5.43763	0.979344	5.55232	2.81906e-08	1.98164e-07
ccser1.L	40.9747	3.25344	0.743363	4.37665	1.20518e-05	5.20626e-05
mmrn1.L	0.264993	0	4.99758	0	1	NA
LOC121403118	1.46313	-1.41178	3.02939	-0.466027	0.641196	NA
LOC121403119	0.215989	0.311208	4.98858	0.0623842	0.950257	NA
snca.L	6.00034	0.17956	1.47832	0.121462	0.903325	0.929911
gprin3.L	0	NA	NA	NA	NA	NA
LOC108719625	0	NA	NA	NA	NA	NA
fam13a.L	694.382	1.89131	0.494095	3.82783	0.000129277	0.000453699
dck.1l.L	1479.21	5.48992	0.454636	12.0754	1.42426e-33	1.87189e-31
jchain.L	1.29671	-4.76684	3.65896	-1.30278	0.192648	NA
herc3.L	251.709	1.12526	0.398373	2.82464	0.00473334	0.0113809
LOC121403125	12.3611	-3.033	1.07832	-2.81272	0.0049125	0.0117541
dck.1.L	1090.26	1.19402	0.340089	3.5109	0.000446595	0.00139831
mob1b.L	52.6962	0.437887	0.92205	0.474906	0.634854	0.70762
LOC108710986	0	NA	NA	NA	NA	NA
rufy3.L	245.285	1.34243	0.654405	2.05137	0.0402305	0.0730068
herc6.L	25.3083	0.501416	0.720893	0.695548	0.486712	0.574617
ppm1k.L	45.1482	0.438846	0.72634	0.604188	0.545718	0.628484
abcg2.L	91.0384	-2.02595	0.59549	-3.40215	0.000668585	0.00200145
pkd2.L	527.439	0.523961	0.336172	1.55861	0.119089	0.181816
LOC121401197	0	NA	NA	NA	NA	NA
LOC108711024	5.80382	-1.24126	1.32388	-0.937595	0.348452	0.440247
ibsp.L	0	NA	NA	NA	NA	NA
LOC121403127	0	NA	NA	NA	NA	NA
LOC121403128	0	NA	NA	NA	NA	NA
dspp.L	0.0653049	0	4.99758	0	1	NA
LOC108696526	0	NA	NA	NA	NA	NA
odam.L	0	NA	NA	NA	NA	NA
cdkl2.L	14.1753	-3.60005	1.17033	-3.07609	0.00209733	0.00554549
g3bp2.L	3396.21	-1.49985	0.246495	-6.08471	1.16705e-09	1.02153e-08
uso1.L	1397.69	-0.55611	0.548542	-1.0138	0.31068	0.401057
LOC121403134	53.453	-4.68743	0.644468	-7.27333	3.50732e-13	5.11896e-12
LOC108719629	0.129768	0	4.99758	0	1	NA
ambn.L	0	NA	NA	NA	NA	NA
LOC108719630	0.259536	0	4.99758	0	1	NA
rchy1.L	47.1193	-2.9119	0.620967	-4.68929	2.74153e-06	1.34078e-05
LOC108711048	8.42518	-1.06325	1.29902	-0.818499	0.413072	0.503657
btc.L	219.492	-0.333816	0.766249	-0.43565	0.663091	0.732722
areg.L	1.42452	-2.84792	3.78943	-0.751544	0.452325	NA
ereg.L	2.93734	-6.34981	3.66761	-1.73132	0.0833944	0.134961
epgn.L	0	NA	NA	NA	NA	NA
LOC108711079	0.31548	-1.24073	4.97116	-0.249586	0.802907	NA
cxcl2.L	25.5201	4.08242	1.0803	3.77896	0.000157482	0.00054475
cxcl8.L	3.60681	-4.11906	2.29891	-1.79174	0.0731745	0.120995
LOC108711090	0.251532	-2.48137	4.99005	-0.497263	0.619004	NA
XB5945946.L	3.13087	1.5741	2.08395	0.755345	0.450042	0.539524
LOC108711093	27.9848	2.54757	0.952545	2.67449	0.00748425	0.0170874
rassf6.L	10.5807	-2.13618	1.40928	-1.51579	0.129572	0.195119
LOC121400630	0	NA	NA	NA	NA	NA
LOC100189571	0.294564	-2.63302	4.98019	-0.528699	0.597014	NA
LOC121403141	0	NA	NA	NA	NA	NA
LOC108711114	1.83379	2.90152	2.77919	1.04402	0.296478	NA
LOC108711102	937.981	-1.53294	0.285973	-5.36044	8.30203e-08	5.36222e-07
cox18.L	204.47	-0.600724	0.340138	-1.76612	0.0773759	0.126886
adamts3.L	200.285	2.53038	0.746986	3.38746	0.000705435	0.00209944
npffr2.L	4.18646	-4.96148	2.2397	-2.21524	0.0267436	0.051369
slc4a4.L	12.335	-2.04996	1.20483	-1.70145	0.0888586	0.142203
LOC121403335	0.961261	2.72411	3.07579	0.885663	0.375799	NA
cxcl10.L	0.336692	1.37075	4.89236	0.280182	0.779338	NA
naaal.L	0.296858	-0.907136	4.96943	-0.182543	0.855156	NA
naaa.L	83.9733	0.251779	0.42883	0.58713	0.557117	0.638508
ppef2.L	0.588286	-3.66113	4.88313	-0.74975	0.453405	NA
nup54.L	1346.34	0.456688	0.292794	1.55976	0.118817	0.181485
scarb2.L	287.384	0.111292	0.469778	0.236903	0.812732	0.857445
cbm20.L	36.2178	-6.00074	0.964211	-6.22347	4.86281e-10	4.51785e-09
LOC108711175	231.323	1.57744	0.455284	3.46475	0.000530723	0.00162904
stbd1.L	353.831	0.762531	0.292198	2.60964	0.0090637	0.0201387
LOC108711198	4095.72	2.64119	0.243895	10.8292	2.50328e-27	1.82473e-25
LOC121403158	0.730966	-2.76933	4.84526	-0.571553	0.567625	NA
shroom3.L	242.226	-3.00862	0.663545	-4.53417	5.78309e-06	2.64907e-05
sowahb.L	186.846	3.83361	0.557516	6.87624	6.14536e-12	7.44856e-11
septin11.L	646.473	1.65219	0.404092	4.08864	4.33901e-05	0.000167727
LOC121403446	0.13984	0	4.99758	0	1	NA
ccni.L	200.871	0.960182	0.392452	2.44662	0.0144201	0.030204
ccng2.L	355.456	0.0459296	0.600504	0.0764851	0.939033	0.956267
cxcl13.L	60.1528	0.536849	0.630268	0.851779	0.394337	0.485606
LOC108711250	1.84983	3.28828	2.6145	1.25771	0.208497	NA
cnot6l.L	4897.27	0.751989	0.357334	2.10444	0.0353399	0.0652698
LOC121403519	0.229259	-2.63301	4.98019	-0.528697	0.597016	NA
mrpl1.L	456.063	2.7338	0.331165	8.25509	1.51794e-16	3.42298e-15
fras1.L	46.1466	-1.90416	0.804371	-2.36727	0.0179199	0.036432
anxa3.L	1333.16	0.611834	0.312843	1.95572	0.0504977	0.0885513
ptpn9l.L	288.418	-2.30164	0.380433	-6.05005	1.44804e-09	1.25524e-08
LOC108719663	0	NA	NA	NA	NA	NA
pde6b.L	0.31548	-1.24073	4.97116	-0.249586	0.802907	NA
rbp4l.L	1.93761	1.91597	2.41219	0.794288	0.427028	NA
idua.L	3.6472	1.1811	2.14401	0.550885	0.581712	0.661555
slc26a1.L	0	NA	NA	NA	NA	NA
prc1.2.L	487.95	-0.584194	0.59339	-0.984503	0.324868	0.416046
chrna6.L	0.186227	-2.48137	4.99005	-0.497264	0.619003	NA
chrnb3.L	1.32752	-0.867616	3.02126	-0.28717	0.773982	NA
dctn6.L	479.105	0.804572	0.535494	1.50249	0.132972	0.199511
rbpms.L	104.199	1.63508	0.694307	2.35498	0.0185238	0.0374724
gtf2e2.L	1135.99	0.758713	0.320021	2.37082	0.0177485	0.0361429
saraf.L	13.4684	4.19831	1.67544	2.5058	0.0122174	0.0261804
gsr.L	63.3597	0.55108	0.591114	0.932275	0.351195	0.443024
LOC108711333	164.574	5.39192	0.676489	7.97046	1.58085e-15	3.10479e-14
leprotl1.S	588.353	-2.61655	0.394585	-6.63113	3.33123e-11	3.65466e-10
cops4.L	661.936	-0.33584	0.320213	-1.0488	0.29427	0.383599
prag1.L	813.054	0.872503	0.456332	1.91199	0.0558775	0.0964957
LOC108711356	2.39635	-4.22331	2.64415	-1.59723	0.110215	NA
LOC121403661	1.1197	2.95652	3.80125	0.777775	0.436702	NA
LOC108711362	33.2119	-3.45891	0.744089	-4.64852	3.34325e-06	1.60757e-05
cenpc.L	232.757	0.0818497	0.797191	0.102673	0.918223	0.941226
uba6.L	514.292	0.699489	0.425809	1.64273	0.100439	0.157748
coq2.L	56.6966	-1.6159	0.522822	-3.09073	0.00199663	0.00530782
LOC108711383	16.8807	3.78068	1.50374	2.5142	0.0119304	0.0256477
LOC108711391	2.58303	1.17655	2.38057	0.49423	0.621144	0.695407
ythdc1.L	3222.44	-0.3441	0.246392	-1.39655	0.162548	0.235903
LOC108711396	0.531984	-1.08909	4.98103	-0.218648	0.826924	NA
hsd17b11.L	0.240399	0.493165	4.97699	0.0990889	0.921068	NA
hpse.L	36.8752	2.57201	0.709872	3.6232	0.000290977	0.000950911
tmem150c.L	2.65492	0.0589909	2.21262	0.0266611	0.97873	0.984633
LOC121403662	20.9421	-0.198462	0.757846	-0.261876	0.793417	0.842082
hnrnpdl.L	23229.7	-2.01838	0.322367	-6.26113	3.82202e-10	3.60494e-09
hnrnpd.L	1402.55	-0.941873	0.256703	-3.66911	0.000243395	0.000809957
rasgef1b.L	201.735	-1.04586	0.626722	-1.66878	0.0951607	0.150655
ptpn13.L	674.236	-1.03951	0.47654	-2.18136	0.0291566	0.0553385
aff1.L	152.91	2.54091	0.660559	3.8466	0.000119768	0.000423354
klhl8.L	318.847	-1.0035	0.404456	-2.48111	0.0130973	0.0277776
LOC108711489	17.7523	3.76164	1.30771	2.87651	0.00402099	0.00987059
hsd17b13.L	0.0699199	0	4.99758	0	1	NA
mapk10.L	1.32223	-3.42516	4.25113	-0.805706	0.420413	NA
arhgap24.L	0.497283	1.19979	4.9057	0.24457	0.80679	NA
LOC108719085	2516.52	4.15429	0.388277	10.6993	1.02557e-26	7.06043e-25
LOC121403663	2.33952	-2.55751	2.99487	-0.853962	0.393126	NA
LOC108711563	3.64326	1.33145	1.76291	0.755254	0.450097	0.539564
LOC108711543	528.947	0.135009	0.525553	0.256889	0.797264	0.8451
cds1.L	172.359	-2.30852	0.378663	-6.09651	1.08409e-09	9.55986e-09
LOC121403664	1.46066	-5.0684	3.40199	-1.48983	0.136268	NA
LOC121403665	25.9634	-0.270309	1.16955	-0.231123	0.817219	0.861131
nkx6-1.L	45.7789	-0.631549	0.616665	-1.02414	0.305771	0.395736
LOC121403666	1.29009	-0.140734	3.12111	-0.0450911	0.964035	NA
LOC121403667	11.5578	-6.50008	1.73938	-3.73702	0.000186215	0.000634027
LOC108719752	0	NA	NA	NA	NA	NA
LOC108711627	8.14846	0.92686	1.43042	0.647962	0.51701	0.602332
LOC121403668	3.01248	-2.37642	2.00975	-1.18245	0.237028	0.322131
gpat3.L	101.73	1.19166	0.445077	2.67743	0.007419	0.0169653
LOC121403669	0.191932	0	4.99758	0	1	NA
fzr1.L	473.271	-1.92629	0.463112	-4.15943	3.19037e-05	0.000126772
LOC121403670	43.0622	-3.79409	0.739531	-5.1304	2.89123e-07	1.69265e-06
LOC121403671	16.4766	-4.21954	1.10581	-3.81578	0.000135752	0.000474693
LOC121403672	48.739	-10.3381	1.57641	-6.55799	5.45382e-11	5.80822e-10
mfhas1.L	127.669	-2.36798	0.55145	-4.2941	1.75405e-05	7.3468e-05
LOC108711659	7.12751	-7.56115	2.18076	-3.4672	0.000525912	0.00161637
LOC121403673	7.1092	-5.07412	1.66802	-3.04199	0.00235019	0.0061423
LOC108711752	470.231	-3.65525	0.511742	-7.14277	9.14672e-13	1.26073e-11
LOC108711745	0	NA	NA	NA	NA	NA
LOC108711672	466.341	-1.61689	0.318221	-5.08104	3.75383e-07	2.15262e-06
LOC121403686	36.3648	-2.40814	0.761233	-3.16348	0.00155897	0.00426691
LOC121403689	0	NA	NA	NA	NA	NA
LOC121403692	9.64151	-1.94287	1.36014	-1.42843	0.153168	0.224633
LOC108711796	233.672	-1.47584	0.405224	-3.64204	0.000270485	0.000890381
ctu1.L	309.93	0.462106	0.344418	1.3417	0.179693	0.256452
mettl14.L	1216.03	-0.0512997	0.326069	-0.157328	0.874987	0.906693
LOC121403702	14.0229	-4.54332	1.22566	-3.70683	0.000209868	0.000707433
LOC108711800	56.2118	2.16772	0.657175	3.29855	0.00097187	0.00280198
LOC121403741	0.442709	2.01141	4.8541	0.414373	0.678601	NA
LOC121403742	0	NA	NA	NA	NA	NA
uhrf1.L	1927.4	0.170462	0.327235	0.520917	0.602425	0.679477
LOC108711853	204.848	0.0872069	0.338472	0.257649	0.796678	0.844603
LOC108711999	4.45915	0.155007	1.68571	0.0919534	0.926735	0.947154
LOC121393159	0.135225	0	4.99758	0	1	NA
LOC121393161	0	NA	NA	NA	NA	NA
LOC108712047	68.9509	-9.34178	1.6209	-5.76332	8.24746e-09	6.32362e-08
noa1.L	717.069	-1.07732	0.324041	-3.32465	0.000885312	0.0025825
LOC121393166	11.0773	-3.46712	1.16468	-2.97689	0.00291186	0.00741951
LOC108712074	999.929	-1.43034	0.308509	-4.63631	3.54688e-06	1.69421e-05
rest.L	687.607	0.238848	0.53463	0.446753	0.655053	0.72569
hnrnpm.L	4697.84	-1.57398	0.385588	-4.08204	4.46418e-05	0.000172182
fbn3.L	1891.99	-6.54178	0.625581	-10.4571	1.35906e-25	8.24399e-24
LOC121401235	0.714822	-2.5767	4.85515	-0.530715	0.595616	NA
LOC121393185	6.2973	0.539937	1.3425	0.402188	0.687545	0.753792
lsm7.L	732.658	-1.2791	0.274892	-4.65308	3.27017e-06	1.57525e-05
sppl2b.L	0.798408	-2.67583	4.82921	-0.554093	0.579515	NA
tmprss9.L	62.6979	-1.1064	0.55506	-1.99329	0.0462294	0.0820563
timm13.L	562.034	-1.26477	0.30216	-4.18576	2.84209e-05	0.00011396
lmnb2.L	842.087	0.705065	0.345933	2.03815	0.0415345	0.0749915
rpl36.L	997.359	-3.52948	0.387412	-9.11038	8.20902e-20	2.7458e-18
LOC108712188	0.0699199	0	4.99758	0	1	NA
LOC108696601	25.6227	1.18934	0.779287	1.52619	0.126963	0.191834
mfsd12.L	317.338	3.60914	0.388951	9.27916	1.70824e-20	6.25225e-19
LOC108712202	102.751	-3.18587	0.639956	-4.97826	6.41581e-07	3.5268e-06
pias4.L	1801.28	-0.587014	0.319519	-1.83718	0.066183	0.111208
LOC108712203	5.99275	-2.42176	1.48138	-1.6348	0.102091	0.15986
eef2.1.L	13454.1	-2.64955	0.280135	-9.45813	3.13504e-21	1.22866e-19
dapk3.L	273.597	0.993033	0.48982	2.02734	0.0426275	0.0766989
atcay.L	14.5573	3.77303	1.32611	2.84519	0.00443849	0.0107524
XB5845204.L	1.04664	-0.788805	3.90357	-0.202073	0.83986	NA
rax2.L	0.362163	-0.907119	4.96943	-0.18254	0.855159	NA
apba3.L	1110.24	1.59853	0.286084	5.58762	2.30202e-08	1.64215e-07
tjp3.L	549.08	-0.828716	0.265931	-3.11628	0.0018315	0.00491655
LOC108712206	39.7702	0.0711779	0.67898	0.104831	0.91651	0.93986
cactin.L	897.709	0.335634	0.342391	0.980264	0.326956	0.418287
tbxa2r.L	0	NA	NA	NA	NA	NA
LOC121393212	4.50278	-6.88063	2.39284	-2.87551	0.00403375	0.00989724
hmg20b.L	144.368	-0.965524	0.61534	-1.56909	0.116627	0.178759
mydgf.L	374.429	-2.16624	0.306043	-7.07822	1.46021e-12	1.93972e-11
dpp9.L	500.918	0.0378422	0.436354	0.0867236	0.930891	0.950303
LOC121393218	0.257237	0	4.99758	0	1	NA
sema6b.L	7.23566	-0.805775	1.1984	-0.672373	0.501346	0.588503
LOC121393229	1.26095	-2.75105	2.93023	-0.938854	0.347806	NA
LOC121393224	1.05448	1.78672	3.89709	0.458476	0.646611	NA
lrg1.L	0	NA	NA	NA	NA	NA
plin3.L	1156.32	4.01845	0.391922	10.2532	1.14505e-24	6.47777e-23
hdgfl2.L	757.645	-0.37402	0.508067	-0.736163	0.461632	0.55088
ubxn6.L	203.411	-0.767349	0.45498	-1.68655	0.0916893	0.146015
chaf1a.L	1659.64	0.6779	0.389043	1.74248	0.0814243	0.132402
sh3gl1.L	623.524	0.589463	0.467475	1.26095	0.207326	0.288856
LOC108712211	10.1334	-3.34595	1.24624	-2.68484	0.00725643	0.0166344
fsd1.L	46.4297	-4.42679	0.665725	-6.64957	2.93948e-11	3.2523e-10
shd.L	50.4237	-7.97477	1.48157	-5.38265	7.33957e-08	4.79652e-07
ankrd24.L	14.6408	-2.41016	1.01997	-2.36296	0.0181297	0.0367895
LOC108712214	12.8407	3.56637	1.34743	2.64679	0.00812589	0.0183351
b4galt1.1.L	20.0601	-1.82845	0.874832	-2.09006	0.0366128	0.0673006
LOC108696053	34.7438	-4.60087	0.885365	-5.19658	2.02992e-07	1.22025e-06
b4galt1.2.L	10.9501	-2.79771	1.3019	-2.14895	0.0316385	0.0593647
smu1.L	737.484	0.53891	0.418468	1.28782	0.19781	0.277844
dnaja1.L	3921.1	-0.0466256	0.285457	-0.163337	0.870253	0.903206
aptx.L	758.656	0.190973	0.391023	0.488394	0.625271	0.698934
LOC121393277	1.00377	-4.59981	4.50752	-1.02047	0.307504	NA
kcmf1.L	798.51	-1.07396	0.372625	-2.88216	0.00394964	0.00971377
slc20a2.L	414.467	2.46724	0.592051	4.16727	3.08265e-05	0.000122848
LOC108712220	0.261852	0	4.99758	0	1	NA
paqr3.L	143.124	1.38788	0.633273	2.1916	0.0284086	0.0541515
antxr2.L	143.373	4.11801	0.57031	7.22065	5.17412e-13	7.36979e-12
prdm8.L	13.249	-4.62529	1.3664	-3.38502	0.00071172	0.00211646
LOC121400661	0	NA	NA	NA	NA	NA
LOC121400662	0	NA	NA	NA	NA	NA
cfap299.L	24.6057	0.581954	0.697224	0.834673	0.403902	0.494763
bmp3.L	5.652	-1.51989	1.33675	-1.13701	0.255536	0.342285
prkg2.L	178	1.78535	0.550229	3.24473	0.00117562	0.00332553
LOC108712226	184.521	-0.512737	0.414205	-1.23788	0.21576	0.298121
LOC108719845	0.944894	-2.633	4.97759	-0.52897	0.596826	NA
pomk.L	398.745	3.28873	0.456526	7.20381	5.85524e-13	8.28103e-12
hgsnat.L	558.39	1.813	0.600602	3.01864	0.00253909	0.00657786
ints10.L	528.524	-1.49774	0.447849	-3.3443	0.00082491	0.00242014
csgalnact1.L	62.5336	-1.32059	0.853035	-1.54811	0.121595	0.184883
LOC108712230	0.477593	-1.08909	4.98103	-0.218648	0.826924	NA
sh2d4a.L	7.32742	1.51833	1.26952	1.19599	0.2317	0.31593
LOC108712232	34.8628	-0.7286	0.737882	-0.987421	0.323436	0.414658
LOC121393298	1.45526	-1.05652	3.18065	-0.332172	0.73976	NA
lpl.L	14.47	-2.7253	1.20116	-2.26889	0.0232753	0.0456851
fut10.L	253.788	3.80684	0.414026	9.19469	3.76091e-20	1.30843e-18
LOC108712234	60.254	-4.51025	0.701921	-6.42558	1.31369e-10	1.32711e-09
LOC108712235	0.521693	1.37074	4.87968	0.280908	0.778781	NA
LOC108696621	0.634824	1.20226	4.60687	0.26097	0.794115	NA
LOC108712236	0.523823	-3.66113	4.88313	-0.74975	0.453405	NA
ubxn8.L	2.97721	-0.639743	1.85142	-0.345542	0.729687	0.790304
ppp2cb.L	1307.04	1.3268	0.285479	4.64763	3.35774e-06	1.61387e-05
wrn.L	1158.18	-0.814377	0.450031	-1.8096	0.0703573	0.117067
purg.L	35.6129	-1.65584	0.608245	-2.72232	0.00648252	0.015058
LOC121393313	0.757697	-4.25007	4.85042	-0.876227	0.380907	NA
LOC121393316	0.969586	-4.15946	3.95005	-1.05301	0.292335	NA
LOC108712238	40.4424	2.03791	1.05861	1.92508	0.0542189	0.0940375
LOC121400666	0	NA	NA	NA	NA	NA
LOC121393317	0.110631	0.493165	4.97699	0.0990889	0.921068	NA
dusp4.L	194.91	1.18568	0.692001	1.71341	0.0866374	0.139171
tnks.S	604.55	0.707811	0.512377	1.38143	0.167148	0.241396
LOC121393322	0.61831	-1.82027	4.64163	-0.392163	0.694938	NA
LOC121393321	2.14664	-2.36852	2.34606	-1.00958	0.312699	NA
LOC121393323	0.604883	-1.06174	4.14185	-0.256345	0.797685	NA
LOC108705455	4.00035	-2.38244	1.70519	-1.39718	0.162361	0.235684
ppp1r3b.L	1220.87	-0.380514	0.367061	-1.03665	0.299899	0.389377
eri1.L	854.06	1.61928	0.332474	4.87038	1.11382e-06	5.85674e-06
LOC121393326	5.59463	-7.06838	2.11791	-3.33743	0.000845571	0.00247489
dohh.L	948.206	1.12271	0.633806	1.77138	0.0764977	0.125596
LOC108696625	0.813631	-0.939354	3.80342	-0.246976	0.804927	NA
LOC100301952	0.642942	0.352358	4.54052	0.0776031	0.938144	NA
rorb.2.L	28.5791	2.08316	0.917252	2.27109	0.0231414	0.0454703
abhd17a.L	250.48	1.82014	0.479919	3.7926	0.00014908	0.000518236
rexo1.L	501.684	-0.229831	0.534357	-0.430109	0.667117	0.736296
atp8b3.L	57.2067	-3.95797	0.680075	-5.8199	5.88841e-09	4.62524e-08
onecut3.L	14.8692	-4.07765	1.03968	-3.92203	8.78052e-05	0.000318416
tcf3.L	3989.17	-1.07063	0.274389	-3.90187	9.54533e-05	0.000343851
LOC108712319	2990.83	-2.14585	0.441466	-4.86073	1.16953e-06	6.12612e-06
LOC108712329	4034.26	-0.430514	0.339518	-1.26802	0.204792	0.286014
mex3d.L	323.412	1.06965	0.43627	2.4518	0.0142142	0.0298159
LOC108712370	1.86221	-3.99214	2.8603	-1.39571	0.162803	NA
LOC108712381	285.784	0.211908	0.422947	0.501027	0.616352	0.691176
upf1.L	1736.72	-1.9914	0.298577	-6.66964	2.5643e-11	2.85908e-10
LOC121393347	17.9732	-1.71168	0.920805	-1.8589	0.0630415	0.10668
arrdc2.L	45.0967	-1.52732	0.577586	-2.64432	0.00818551	0.018441
pigg.L	0	NA	NA	NA	NA	NA
LOC108719867	74.9834	-2.10978	0.439865	-4.79642	1.61524e-06	8.24991e-06
cwf19l1.L	1739	1.35823	0.283783	4.78615	1.70008e-06	8.65436e-06
LOC121393352	0.0862211	0.311208	4.98858	0.0623842	0.950257	NA
gadd45b.L	12.5354	-3.30961	1.11683	-2.96339	0.00304271	0.00771137
gng7.L	371.109	-1.30303	0.401233	-3.24755	0.00116401	0.00329502
LOC108712412	0.491712	1.5266	4.88147	0.312733	0.754483	NA
slc39a3.L	248.807	1.5512	0.39823	3.89523	9.81053e-05	0.000352575
sgta.L	695.993	1.02752	0.272121	3.77598	0.000159379	0.000550947
thop1.L	28.4476	0.948502	0.745958	1.27152	0.203543	0.284499
LOC121393355	0.0862211	0.311208	4.98858	0.0623842	0.950257	NA
LOC108712438	3.70612	-3.43434	2.11005	-1.62761	0.103608	0.161963
LOC108719882	1.14881	1.90286	3.27061	0.581804	0.560698	NA
XB5962940.L	745.238	1.22154	0.429205	2.84605	0.00442655	0.0107285
LOC121393362	3.88818	-1.78016	2.22415	-0.800377	0.423493	0.513874
pcsk4.L	20.3234	1.80723	0.972187	1.85894	0.063036	0.106678
LOC108712461	1.244	0.327441	2.75802	0.118723	0.905494	NA
reep6.L	625.61	3.75181	0.381958	9.82258	9.00107e-23	4.19025e-21
c19orf25.L	390.608	0.0628753	0.389982	0.161226	0.871915	0.904267
apc2.L	26.027	-2.55598	1.02936	-2.48307	0.0130255	0.0276613
LOC108696642	0.78794	-4.45792	4.84167	-0.920739	0.357187	NA
rps15.L	1268.77	-2.84708	0.530852	-5.36322	8.17513e-08	5.30131e-07
dazap1.L	1975.28	-1.16337	0.351443	-3.31025	0.000932127	0.0027006
gamt.L	1775.62	-1.39345	0.259342	-5.37305	7.74167e-08	5.03654e-07
ndufs7.L	328.604	-0.0485745	0.613824	-0.0791343	0.936926	0.954592
pwwp3a.L	265.488	0.146677	0.544884	0.269189	0.787784	0.837542
LOC108712576	3.61953	0.748963	1.67422	0.447352	0.654621	0.725365
LOC108712583	24.4998	1.40225	0.766695	1.82896	0.0674063	0.11295
efna2.L	0.135225	0	4.99758	0	1	NA
fam174c.L	2512.36	0.610849	0.348464	1.75298	0.0796059	0.129953
LOC121393399	3.5568	0.597846	1.87069	0.319586	0.749282	0.80666
cirbp.L	111604	-2.54617	0.434293	-5.86279	4.55145e-09	3.64438e-08
LOC108696040	18.6952	0.376853	0.826677	0.455864	0.648488	0.719884
midn.L	3601.17	-0.780255	0.408795	-1.90867	0.0563047	0.0971178
atp5f1d.L	193.397	-2.15777	0.454639	-4.74612	2.07352e-06	1.03948e-05
cbarp.L	84.5177	0.843662	0.662819	1.27284	0.203075	0.283952
stk11.L	284.535	1.91508	0.469733	4.07696	4.56285e-05	0.000175571
LOC121400942	0.0699199	0	4.99758	0	1	NA
LOC121400943	0.832549	0.46296	3.75486	0.123296	0.901873	NA
cnn2.L	3477.26	-2.09958	0.340399	-6.168	6.91585e-10	6.26641e-09
arhgap45.L	275.754	-3.91187	0.398927	-9.80599	1.06103e-22	4.88694e-21
polr2e.L	2626.65	-1.64238	0.305951	-5.36811	7.95642e-08	5.16721e-07
LOC108696057	68.64	-0.0361728	0.706873	-0.051173	0.959188	0.97095
gpx4.L	767.051	-1.0674	0.325149	-3.2828	0.00102781	0.00294372
sbno2.L	610.271	-2.24201	0.295216	-7.59449	3.09016e-14	5.1579e-13
tmem259.L	742.708	-1.25207	0.423972	-2.95318	0.00314518	0.00792937
grin3b.L	3.55546	-3.12058	1.72465	-1.8094	0.070389	0.117103
wdr18.L	414.164	-2.7015	0.301854	-8.94971	3.56432e-19	1.10029e-17
arid3a.L	663.075	1.20737	0.388138	3.11068	0.0018666	0.00500098
trnaa-ugc	0	NA	NA	NA	NA	NA
LOC108696151	0	NA	NA	NA	NA	NA
LOC108696164	0.13061	0	4.99758	0	1	NA
r3hdm4.L	283.483	-0.412644	0.561061	-0.735471	0.462053	0.551231
LOC121396350	0.759459	-3.39275	4.34449	-0.780933	0.434842	NA
med16.L	845.017	-0.502376	0.401189	-1.25222	0.21049	0.292387
cfd.L	19.4827	-8.85747	1.78245	-4.96928	6.72023e-07	3.68015e-06
prtn3.L	0.33989	-1.05878	4.95953	-0.213483	0.83095	NA
plppr3.L	14.2824	-1.12667	1.06258	-1.06031	0.289004	0.378231
LOC121393407	195.037	-0.540296	0.525781	-1.02761	0.304135	0.393815
ptbp1.L	8390.47	-1.72091	0.25815	-6.66631	2.62322e-11	2.91976e-10
LOC108712593	11.8347	0.76651	1.05541	0.726265	0.467676	0.556562
LOC108712598	4.88352	-2.55047	1.9038	-1.33968	0.180351	0.25718
palm.L	783.937	-4.67483	0.357956	-13.0598	5.58912e-39	1.09358e-36
XB17329844.L	168.924	3.09984	0.447886	6.92106	4.48272e-12	5.56289e-11
LOC108712617	197.497	2.85143	0.461502	6.17859	6.46761e-10	5.88074e-09
timm10.L	617.696	-0.276254	0.366743	-0.753261	0.451293	0.540749
LOC121393441	0	NA	NA	NA	NA	NA
XB5806080.L	19.468	2.73239	1.03745	2.63376	0.00844444	0.0189407
LOC108696658	0	NA	NA	NA	NA	NA
LOC108712630	13.9972	-2.81125	1.07697	-2.61033	0.00904548	0.0201103
LOC108712642	10.0668	-3.34442	1.49071	-2.24351	0.0248637	0.0482929
ndufa7.L	57.3205	-0.960934	0.519752	-1.84883	0.0644823	0.108769
rps28p9.L	1493.62	-2.61414	0.465326	-5.61787	1.9333e-08	1.39945e-07
trnay-gua	3.17535	-1.48082	2.04374	-0.724564	0.468719	0.557548
kank3.L	39.1937	-0.37122	1.09738	-0.33828	0.735152	0.794933
angptl4.L	70.2252	0.0672059	0.736827	0.0912099	0.927326	0.947609
rab11b.1.L	1970.67	-0.0213349	0.258276	-0.0826052	0.934165	0.952727
LOC108712686	147.618	4.18146	0.641894	6.51425	7.30549e-11	7.66576e-10
rab11b.2.L	2.90282	-2.12071	1.86756	-1.13555	0.256146	0.342973
lonp1.L	369.408	0.520776	0.332048	1.56837	0.116794	0.178942
larp6-like.1.L	423.142	6.15502	0.745695	8.25407	1.53085e-16	3.44912e-15
LOC121401248	4.14689	1.07718	1.60602	0.670717	0.502401	0.589472
LOC108712727	0.27045	0	4.99758	0	1	NA
ndufa11.L	106.184	-3.48844	0.460112	-7.58173	3.40964e-14	5.65794e-13
vmac.L	74.815	0.424338	0.722396	0.587403	0.556933	0.638406
caps.L	0.642101	0.353404	4.4837	0.0788198	0.937176	NA
ranbp3.L	1452.96	-0.515891	0.290808	-1.77399	0.0760645	0.12498
slc1a6.L	1.58315	2.19425	4.27664	0.513079	0.607896	NA
LOC108712762	2.47453	-0.147298	1.9448	-0.0757394	0.939626	NA
LOC108712768	2208.56	0.314532	0.242934	1.29472	0.195416	0.275149
acsbg2.L	1121.29	0.784584	0.411681	1.90581	0.0566752	0.097647
mllt1.L	1840.39	-0.0589022	0.297417	-0.198046	0.843009	0.881314
acer1.L	24.9541	-0.146905	0.826015	-0.177848	0.858843	0.894308
anp32c.L	21160.8	-0.067691	0.363995	-0.185967	0.852471	0.889132
znf414.L	363.505	0.428789	0.411409	1.04225	0.297298	0.386766
myo1f.L	3.62311	-2.16491	1.79273	-1.2076	0.227199	0.31096
adamts10.L	152.13	-1.85356	0.585205	-3.16737	0.00153822	0.00421537
zap70.L	25.4059	-3.09976	1.35271	-2.29153	0.0219329	0.0434038
LOC108712806	51.2062	0.395531	0.867788	0.455792	0.64854	0.719884
LOC108719952	0.629577	1.19978	4.9057	0.244569	0.80679	NA
XB5727280.L	1297.31	1.20069	0.383403	3.13167	0.00173815	0.00469649
LOC121393507	0.229259	-2.63301	4.98019	-0.528697	0.597016	NA
lingo3.L	0.553034	1.52658	4.88147	0.312731	0.754485	NA
oaz1.L	7297.45	-1.15322	0.286557	-4.02441	5.71178e-05	0.000214299
jsrp1.L	64.2393	1.25782	0.725188	1.73447	0.0828342	0.134205
amh.L	2.34394	1.24794	2.54996	0.489395	0.624562	NA
sf3a2.L	2750.16	-0.607274	0.63232	-0.960392	0.336858	0.428637
plekhj1.L	921.34	-2.00301	0.291093	-6.88098	5.94438e-12	7.22179e-11
dot1l.L	1573.25	-1.63305	0.306378	-5.33017	9.81196e-08	6.24753e-07
LOC108712868	33.9928	-1.95205	0.655425	-2.97831	0.00289847	0.00738755
ap3d1.L	1300.18	1.51148	0.3375	4.47848	7.5178e-06	3.36781e-05
mob3a.L	1196.41	1.73152	0.265859	6.51292	7.37061e-11	7.72474e-10
LOC121393508	23.684	0.685639	0.762291	0.899446	0.368415	0.459887
LOC121393509	0.0862211	0.311208	4.98858	0.0623842	0.950257	NA
mknk2.L	2100.93	-1.02399	0.288253	-3.5524	0.000381735	0.00121337
btbd2.L	451.295	-2.37522	0.283551	-8.37671	5.44261e-17	1.30058e-15
csnk1g2.L	2404.61	2.69896	0.275663	9.79077	1.23355e-22	5.63172e-21
LOC108719971	0.447324	2.01141	4.8541	0.414373	0.678601	NA
LOC108719980	0	NA	NA	NA	NA	NA
LOC108719988	0	NA	NA	NA	NA	NA
LOC121393510	0.13061	0	4.99758	0	1	NA
LOC108712891	722.045	-0.419682	0.4891	-0.858071	0.390853	0.482297
LOC108712908	424.358	-0.0139434	0.408198	-0.0341583	0.972751	0.980323
arhgef18.L	386.445	1.09479	0.495458	2.20966	0.027129	0.0519895
enc1.2.L	409.353	-1.68048	0.3475	-4.83591	1.32535e-06	6.88417e-06
pex11g.L	63.7061	1.52277	0.503638	3.02355	0.0024983	0.00648575
LOC108712940	770.31	-5.363	0.437919	-12.2466	1.75271e-34	2.50609e-32
b4galt1l.L	38.6738	-6.35201	1.11362	-5.70395	1.17063e-08	8.79679e-08
lsm4.L	477.922	-3.3676	0.376449	-8.94569	3.69619e-19	1.13695e-17
jund.L	29.7217	-4.24392	0.826199	-5.13667	2.79642e-07	1.64381e-06
XB22169526.L	2.49756	-1.16745	3.19695	-0.365178	0.714979	0.777481
LOC108713007	151.362	-3.03511	0.5173	-5.86721	4.43183e-09	3.55845e-08
rab3a.L	128.547	0.957959	0.522242	1.83432	0.0666065	0.111811
mpv17l2.L	76.5832	1.1535	0.647437	1.78164	0.0748072	0.123311
ifi30.L	905.787	1.44416	0.443157	3.2588	0.00111886	0.00318034
pik3r2.L	816.596	2.19176	0.473869	4.62525	3.74152e-06	1.77837e-05
mast3.L	1454.44	0.28667	0.482475	0.594165	0.552402	0.63444
LOC121393511	0.558681	-3.96898	4.8644	-0.815923	0.414544	NA
LOC121393104	0	NA	NA	NA	NA	NA
LOC108720006	9.82046	1.65655	1.27698	1.29725	0.194547	0.274207
gna15.L	0	NA	NA	NA	NA	NA
LOC108696664	1.06441	1.03865	3.07002	0.338319	0.735123	NA
fam32a.L	2862	-0.330613	0.484176	-0.682836	0.49471	0.582106
LOC108713059	38.1965	0.523299	0.81629	0.64107	0.521477	0.606421
LOC108713066	53.3573	1.81335	0.635269	2.85446	0.004311	0.0104843
tpm4.L	1145.88	-0.824076	0.403035	-2.04467	0.040887	0.0739871
rab8a.L	946.005	-2.01216	0.407472	-4.93817	7.88608e-07	4.27362e-06
pnhd.L	2146.51	0.45088	0.463295	0.973204	0.330452	0.422137
admp.L	848.104	-0.0556813	0.4629	-0.120288	0.904255	0.930758
XB5740125.L	98.57	1.21981	0.437774	2.7864	0.00532975	0.0126501
elavl1.L	1801.33	-1.10823	0.418397	-2.64875	0.00807905	0.0182501
LOC108713086	23.3667	-1.44662	0.732439	-1.97507	0.0482605	0.0851735
mhc100494167.L	15.3274	-0.0441973	0.959466	-0.0460645	0.963259	0.973652
pram1.L	60.8461	1.1969	0.619316	1.93262	0.0532828	0.0926362
safb.L	2553.76	-1.59279	0.278623	-5.71666	1.08638e-08	8.20876e-08
crygdl.1.L	2.1766	3.99745	4.4481	0.898688	0.368819	NA
crygdl.2.L	0	NA	NA	NA	NA	NA
crygdl.3.L	0	NA	NA	NA	NA	NA
crygdl.4.L	1.81213	-0.995564	2.41622	-0.412034	0.680314	NA
crygdl.5.L	1.77896	-5.27606	3.6782	-1.43442	0.151454	NA
crygdl.6.L	0	NA	NA	NA	NA	NA
crygdl.7.L	0	NA	NA	NA	NA	NA
crygdl.8.L	0	NA	NA	NA	NA	NA
LOC121401282	0	NA	NA	NA	NA	NA
crygdl.11.L	0	NA	NA	NA	NA	NA
crygdl.9.L	0	NA	NA	NA	NA	NA
crygdl.12.L	0	NA	NA	NA	NA	NA
crygdl.13.L	0	NA	NA	NA	NA	NA
crygdl.14.L	0.458518	-3.66113	4.88313	-0.749751	0.453404	NA
crygdl.15.L	0	NA	NA	NA	NA	NA
crygdl.16.L	0	NA	NA	NA	NA	NA
crygdl.17.L	0	NA	NA	NA	NA	NA
crygdl.18.L	0	NA	NA	NA	NA	NA
LOC121400688	0	NA	NA	NA	NA	NA
LOC121400689	0.326067	-2.48136	4.99005	-0.497262	0.619004	NA
LOC121401300	0	NA	NA	NA	NA	NA
LOC121400690	0	NA	NA	NA	NA	NA
LOC121401301	0	NA	NA	NA	NA	NA
LOC121401304	0	NA	NA	NA	NA	NA
crygdl.21.L	0	NA	NA	NA	NA	NA
LOC121400695	0	NA	NA	NA	NA	NA
LOC121400696	0	NA	NA	NA	NA	NA
LOC121400697	0	NA	NA	NA	NA	NA
LOC121400699	0	NA	NA	NA	NA	NA
LOC121401310	0	NA	NA	NA	NA	NA
LOC121401318	0	NA	NA	NA	NA	NA
crygdl.22.L	0	NA	NA	NA	NA	NA
crygdl.23.L	0	NA	NA	NA	NA	NA
crygdl.24.L	0.191932	0	4.99758	0	1	NA
crygdl.25.L	0	NA	NA	NA	NA	NA
crygdl.26.L	0.129768	0	4.99758	0	1	NA
crygdl.27.L	0.378159	-2.48137	4.99005	-0.497264	0.619003	NA
crygdl.28.L	0	NA	NA	NA	NA	NA
crygdl.30.L	0	NA	NA	NA	NA	NA
crygdl.31.L	0.0862211	0.311208	4.98858	0.0623842	0.950257	NA
crygdl.32.L	0.966351	3.3443	4.81246	0.694925	0.487102	NA
crygdl.33.L	0.458518	-3.66113	4.88313	-0.749751	0.453404	NA
LOC108713124	97.2166	-0.997771	0.932629	-1.06985	0.284688	0.373484
mier2.L	118.626	2.67574	0.490102	5.45957	4.77302e-08	3.22619e-07
LOC121401337	0	NA	NA	NA	NA	NA
trnag-ucc	0	NA	NA	NA	NA	NA
trnae-cuc_41	0.0699199	0	4.99758	0	1	NA
LOC108696756	0.291183	1.52659	4.88147	0.312731	0.754485	NA
c2cd4c.L	0.129768	0	4.99758	0	1	NA
shc2.L	0.129768	0	4.99758	0	1	NA
odf3l1.L	1.3634	-1.34728	2.99092	-0.450456	0.652381	NA
mfsd14b.L	673.635	0.138134	0.353318	0.390963	0.695825	0.760849
LOC108695244	1.22452	-1.5742	4.18209	-0.376414	0.706609	NA
tpgs1.L	323.128	0.368924	0.510703	0.722384	0.470058	0.558681
cdc34.L	4580.31	-0.844624	0.335069	-2.52075	0.0117107	0.0252458
bsg.L	8602.32	-0.266862	0.426727	-0.625369	0.531729	0.615971
LOC108713200	222.334	2.19907	0.489214	4.49511	6.95327e-06	3.13379e-05
polrmt.L	512.158	0.248969	0.3674	0.677651	0.497993	0.585175
fgf22.L	11.4253	-3.93557	1.12649	-3.49367	0.000476435	0.00147898
rnf126.L	1433.79	1.16614	0.478351	2.43784	0.0147753	0.0308561
fstl3.L	35.9824	3.07837	0.807263	3.81335	0.000137097	0.000479012
prss57.L	0.278153	0.311208	4.98858	0.0623842	0.950257	NA
gdf15.L	1.75593	-4.77317	2.70124	-1.76703	0.077224	NA
chchd10.L	93.1654	1.31765	0.519318	2.53727	0.0111721	0.0242498
LOC108713230	97.977	2.8212	0.582022	4.84724	1.25189e-06	6.53124e-06
LOC108713257	0.299179	-2.63302	4.98019	-0.5287	0.597014	NA
ssbp4.L	72.8332	-9.4847	1.62072	-5.85214	4.85279e-09	3.8619e-08
isyna1.L	521.792	-0.467419	0.341251	-1.36972	0.170774	0.245649
LOC121401340	0	NA	NA	NA	NA	NA
LOC121393530	2.12113	-5.79455	3.35424	-1.72753	0.0840727	NA
ell.L	312.915	-1.01572	0.43109	-2.35617	0.0184645	0.037364
fkbp8.L	450.004	1.51225	0.49571	3.05068	0.00228326	0.00597758
kxd1.L	131.038	1.57729	0.584418	2.69891	0.00695676	0.0160393
uba52.L	1271.18	-3.61462	0.36815	-9.81834	9.38768e-23	4.3469e-21
rex1bd.L	287.385	-1.04262	0.411228	-2.53539	0.0112323	0.0243582
crlf1.L	60.109	6.55503	1.5147	4.3276	1.50741e-05	6.40029e-05
tmem59l.L	0.593746	2.11625	4.84929	0.436405	0.662543	NA
klhl26.L	30.8245	3.22717	1.04287	3.09451	0.00197138	0.00524928
LOC121393593	1.60752	2.66069	2.64684	1.00523	0.314784	NA
crtc1.L	239.018	3.07492	0.488702	6.29201	3.13377e-10	3.00037e-09
comp.L	0.605615	1.89959	4.6685	0.406895	0.684085	NA
LOC108695267	0	NA	NA	NA	NA	NA
LOC121393596	0.0653049	0	4.99758	0	1	NA
parp14.3.L	4.31567	3.07066	2.00759	1.52953	0.126134	0.190803
MGC82221	60.023	0.874561	0.615441	1.42103	0.155308	0.227246
stra6l.1.L	1.8633	1.87231	2.49569	0.750217	0.453124	NA
stra6l.2.L	7.37138	1.71607	1.31674	1.30328	0.19248	0.271677
tdrd7.L	909.967	0.383565	0.316313	1.21261	0.225279	0.308776
tmod1.L	1.70202	-4.07106	3.32645	-1.22384	0.221012	NA
tstd2.L	541.958	1.96544	0.415425	4.73115	2.23251e-06	1.11211e-05
ncbp1.L	2499.1	0.77491	0.250053	3.09898	0.00194186	0.00518181
xpa.L	144.783	-2.02503	0.441352	-4.58824	4.47007e-06	2.08542e-05
LOC108713376	43.2438	0.825491	0.632911	1.30428	0.192139	0.271299
foxe1.L	19.3393	-0.728053	1.36683	-0.532656	0.594271	0.672584
trmo.L	510.343	5.55104	0.430667	12.8894	5.163e-38	9.59691e-36
LOC121393603	0.462381	0	4.99758	0	1	NA
anp32b.L	749.939	0.173036	0.4123	0.419684	0.674716	0.742981
coro2a.L	198.175	-0.729347	0.482453	-1.51175	0.130598	0.196425
ecpas.L	1001	0.380958	0.265033	1.4374	0.150605	0.221549
smc2.L	1370.5	-1.2637	0.6354	-1.98882	0.0467212	0.0827941
LOC121393604	2.81036	-0.661521	1.6839	-0.39285	0.69443	0.759614
LOC108696786	0.129768	0	4.99758	0	1	NA
gng10.L	274.827	6.6193	0.773193	8.56099	1.11901e-17	2.92959e-16
LOC108713377	8.76887	1.50764	1.33366	1.13045	0.258286	0.345288
ugcg.L	28.763	0.617861	0.696634	0.886923	0.37512	0.466534
susd1.L	4.31992	-0.540695	1.76583	-0.306199	0.759453	0.814677
ptbp3.L	339.81	-1.75658	0.501471	-3.50286	0.000460291	0.00143485
LOC108713381	112.352	4.07012	0.739139	5.50657	3.65889e-08	2.51693e-07
snx30.L	578.339	1.87425	0.330894	5.6642	1.47711e-08	1.08799e-07
LOC108713383	0	NA	NA	NA	NA	NA
LOC108713384	0.634306	-3.38856	4.9033	-0.691078	0.489517	NA
slc46a2.L	2.65409	-2.62608	2.59034	-1.0138	0.310679	0.401057
palm2akap2.L	1000.4	-1.06713	0.413929	-2.57805	0.00993584	0.0218489
XB22169562.L	367.463	2.15093	0.408731	5.26245	1.42146e-07	8.78012e-07
dcaf10.L	816.622	0.0869026	0.33489	0.259496	0.795253	0.843586
slc25a51.L	34.5357	-1.1462	0.751902	-1.5244	0.12741	0.192364
frmpd1.L	4.39963	-6.88853	2.7888	-2.47007	0.0135087	0.0285131
LOC108713390	862.93	-1.8466	0.397805	-4.64197	3.45104e-06	1.65146e-05
LOC121393624	13.2888	-2.40203	0.929696	-2.58367	0.00977549	0.0215364
fbxo10.L	190.379	1.55367	0.654287	2.3746	0.0175681	0.03584
polr1e.L	1002.3	-0.637894	0.420623	-1.51655	0.129381	0.194865
zbtb5.L	356.848	-1.62555	0.631532	-2.57398	0.0100536	0.0220722
grhpr.2.L	1684.17	0.086894	0.422943	0.205451	0.83722	0.876951
grhpr.1.L	6.39055	-0.969645	1.30156	-0.744987	0.45628	0.54577
LOC494855	555.897	1.26575	0.307014	4.12279	3.74317e-05	0.000146325
XB5752756.L	222.417	1.95558	0.382276	5.11563	3.12696e-07	1.81879e-06
LOC108713392	39.102	1.72572	0.631741	2.73169	0.006301	0.014677
zcchc7.L	507.014	0.903882	0.518149	1.74444	0.0810817	0.13194
pax5.L	2.28503	0.068911	2.16497	0.03183	0.974608	NA
melk.L	634.957	-0.479559	0.500983	-0.957235	0.338449	0.430282
LOC108696791	0	NA	NA	NA	NA	NA
LOC121393652	0	NA	NA	NA	NA	NA
rnf38.L	814.039	0.477631	0.27709	1.72374	0.0847547	0.136703
LOC121393653	0	NA	NA	NA	NA	NA
LOC121393655	0	NA	NA	NA	NA	NA
LOC121393656	0	NA	NA	NA	NA	NA
LOC121400703	0	NA	NA	NA	NA	NA
nans.L	549.103	0.979044	0.39354	2.48779	0.012854	0.0273352
clta.L	1651.76	-0.517417	0.403446	-1.28249	0.19967	0.279973
gne.L	539.713	0.129094	0.326726	0.395115	0.692758	0.758388
LOC121393660	1.04238	-1.19307	3.04056	-0.392385	0.694774	NA
LOC121393665	2.88	-2.27625	2.04482	-1.11318	0.265632	0.353114
cplx1.L	0.0862211	0.311208	4.98858	0.0623842	0.950257	NA
LOC108696803	0.0653049	0	4.99758	0	1	NA
LOC108713395	15.9509	2.82538	1.28689	2.19551	0.0281267	0.0536653
LOC108695294	483.678	-0.951978	0.417148	-2.28211	0.0224828	0.0443504
LOC108713396	138.664	0.392149	0.457712	0.85676	0.391578	0.482963
LOC121393674	0.0862211	0.311208	4.98858	0.0623842	0.950257	NA
LOC108705656	0	NA	NA	NA	NA	NA
LOC121393677	0.99443	1.52464	4.60575	0.331029	0.740622	NA
LOC108713397	0.5159	1.77923	4.86609	0.365638	0.714635	NA
slc49a3.L	38.8457	0.952354	0.677874	1.40491	0.160047	0.232859
dgkq.L	425.962	2.89062	0.509366	5.67493	1.38744e-08	1.02864e-07
LOC108713400	42.9066	1.6409	0.615312	2.66678	0.00765811	0.0174309
cartpt.L	0.358669	-0.200513	4.89803	-0.0409375	0.967346	NA
LOC108713401	603.982	-1.25646	0.471082	-2.66719	0.00764887	0.0174144
fcho1.L	267.616	-1.46353	0.441178	-3.31733	0.000908832	0.00264222
b3gnt3.2.L	1739.38	-1.77988	0.333242	-5.34111	9.23808e-08	5.92125e-07
rflcii.L	0.900141	-3.39494	4.12092	-0.823831	0.410036	NA
jak3.L	555.189	3.80349	0.446699	8.51468	1.67057e-17	4.29577e-16
slc5a5.L	155.373	2.30708	0.662823	3.48069	0.000500121	0.0015447
ccdc124.L	858.435	0.642855	0.365828	1.75726	0.0788733	0.128992
kcnn1.L	2.33966	-1.8957	2.59254	-0.731214	0.464649	NA
ocel1.L	1.7614	-2.55938	2.82103	-0.90725	0.364274	NA
ocel1.2.L	5.68539	-2.47891	1.41734	-1.74899	0.080292	0.130852
nr2f6.L	301.298	-2.64055	0.362284	-7.28861	3.13165e-13	4.60684e-12
babam1.L	192.919	0.320947	0.440202	0.729092	0.465946	0.554883
LOC108696815	1.38972	-2.70354	3.30795	-0.817285	0.413765	NA
insr.L	502.433	-0.433445	0.318104	-1.36259	0.173012	0.248513
use1.L	100.021	-2.25856	0.531675	-4.24801	2.15675e-05	8.87632e-05
nwd1.L	49.1715	-1.47122	0.587268	-2.5052	0.0122382	0.0262133
sin3b.L	1239.1	1.4273	0.389726	3.66233	0.000249932	0.00082906
f2rl3.L	1.83474	-5.56597	3.54401	-1.57053	0.116292	NA
LOC108713409	887.588	-0.0813405	0.260569	-0.312165	0.754915	0.810988
haus8.L	241.485	-0.205027	0.649178	-0.315826	0.752135	0.808752
myo9b.L	1589.28	-0.497811	0.561119	-0.887175	0.374985	0.466432
LOC108713410	3.35979	1.58377	2.32536	0.681085	0.495818	0.583224
arl9.L	518.478	0.872854	0.311168	2.80509	0.00503031	0.0120106
hopx.L	23.8191	-6.09817	1.23588	-4.93429	8.04447e-07	4.351e-06
LOC108713412	0.229259	-2.63301	4.98019	-0.528697	0.597016	NA
spink2.L	2.66376	-3.48529	2.28301	-1.52662	0.126855	0.191727
rnf170.L	42.0533	2.74434	0.677699	4.0495	5.13272e-05	0.000194707
hook3.L	768.575	-0.756526	0.590275	-1.28165	0.199965	0.280356
LOC121393731	75.921	-0.918651	0.578886	-1.58693	0.112529	0.173433
LOC108713414	276.844	-2.70351	0.403668	-6.69736	2.12212e-11	2.39896e-10
abhd8.L	1.52645	1.36626	2.85658	0.478285	0.632447	NA
LOC108713415	0.0653049	0	4.99758	0	1	NA
LOC108713416	159.723	-0.728162	0.442484	-1.64562	0.0998415	0.156971
dda1	937.51	1.24081	0.323538	3.83511	0.000125508	0.000441685
ano8.L	232.247	1.74787	0.386517	4.5221	6.12291e-06	2.78901e-05
LOC108713418	0.307484	2.01141	4.85411	0.414374	0.6786	NA
LOC108713419	0.13061	0	4.99758	0	1	NA
yjefn3.L	0.730966	-2.76933	4.84526	-0.571553	0.567625	NA
exosc3.L	1508.68	-0.402421	0.304841	-1.3201	0.186801	0.265099
gatad2a.L	741.024	-0.501468	0.306259	-1.6374	0.101547	0.159133
mau2.L	1827.38	-0.611797	0.33012	-1.85325	0.063846	0.107852
sugp1.L	1083.65	-1.08597	0.317882	-3.41627	0.000634844	0.00191122
tm6sf2.L	29.2029	-0.00307252	0.679576	-0.00452124	0.996393	0.99785
hapln4.L	0	NA	NA	NA	NA	NA
LOC108713422	2.36089	3.48633	2.44631	1.42514	0.154118	NA
LOC121393767	23.1857	-1.89545	0.930039	-2.03803	0.0415468	0.0750085
LOC121393765	10.304	-0.835985	1.06462	-0.785244	0.432311	0.522576
tmem221.L	253.244	-1.72475	0.437227	-3.94474	7.98861e-05	0.000291977
LOC108713425	10.6026	-5.75281	1.71069	-3.36285	0.000771409	0.00227678
tmem161a.L	1000.9	-0.767234	0.35404	-2.16708	0.0302285	0.0570415
slc25a42.L	40.9618	-3.0105	0.736112	-4.08974	4.31863e-05	0.000167039
armc6.L	316.017	-1.33272	0.314918	-4.23196	2.31667e-05	9.46863e-05
sugp2.L	2628.63	-1.52007	0.278415	-5.45974	4.76838e-08	3.22389e-07
LOC108713429	87.0135	-2.75973	0.484232	-5.69919	1.20379e-08	9.02514e-08
hsd11b1l.L	71.1021	2.20712	0.886244	2.49042	0.0127593	0.0271716
LOC108713430	0.110631	0.493165	4.97699	0.0990889	0.921068	NA
ncln.L	403.873	0.393287	0.35202	1.11723	0.263896	0.351308
s1pr4.L	0.991012	-2.41784	3.99289	-0.605536	0.544823	NA
plpp2.L	4858.84	-0.51039	0.350812	-1.45488	0.145702	0.215285
tle2.L	2263.53	0.260258	0.421559	0.61737	0.536991	0.620547
tle5.L	713.471	-1.11578	0.295627	-3.77427	0.000160474	0.000554068
gna11.L	504.157	2.17013	0.364374	5.95576	2.58861e-09	2.15287e-08
LOC121393792	2.16369	-4.19325	2.75253	-1.52341	0.127655	NA
shb.L	179.871	-2.91008	0.361976	-8.03943	9.0258e-16	1.82501e-14
aldh1b1.L	4.59731	-3.82321	1.89262	-2.02006	0.0433769	0.0778212
igfbpl1.L	171.107	-10.6882	2.51999	-4.24137	2.22163e-05	9.12459e-05
LOC108695328	0.359027	-2.63301	4.98019	-0.528697	0.597016	NA
LOC108713478	92.7596	-0.0205986	0.493584	-0.0417328	0.966712	0.97624
thap1.L	454.003	-0.472739	0.341746	-1.3833	0.166571	0.240776
LOC121393796	0.0699199	0	4.99758	0	1	NA
LOC108713489	3.52562	-6.55784	3.05964	-2.14334	0.0320859	0.0600656
LOC108713500	14.6263	-1.04027	0.898624	-1.15763	0.247015	0.333177
homer3.L	39.3694	-5.61985	0.964373	-5.82746	5.62759e-09	4.43241e-08
ddx49.L	360.694	-0.298462	0.31917	-0.935118	0.349727	0.44158
cope.L	1004.5	-2.6073	0.358185	-7.2792	3.35801e-13	4.90653e-12
cers1.L	3.87413	2.29736	1.7371	1.32253	0.185993	0.264126
gdf1.S	259.721	5.40999	0.663002	8.15985	3.3545e-16	7.17879e-15
LOC121393803	1.25805	-1.07927	2.97898	-0.362294	0.717132	NA
LOC121401344	0.512629	2.01139	4.84393	0.415239	0.677967	NA
LOC121393805	859.513	5.75448	0.620649	9.27172	1.8317e-20	6.67595e-19
LOC121393807	7.15156	3.80859	1.81735	2.09568	0.0361103	0.066499
klf2.L	1495.57	4.33135	0.552272	7.84277	4.40708e-15	8.29251e-14
eps15l1.L	508.027	2.25671	0.300222	7.51681	5.6129e-14	9.06669e-13
c19orf44.L	464.216	0.893941	0.384974	2.32208	0.0202285	0.0404492
LOC121393814	0.912223	-0.0351294	3.69639	-0.0095037	0.992417	NA
LOC108713575	6.92878	-3.26818	1.41973	-2.30198	0.0213364	0.0423715
cherp.L	3660.02	0.0193786	0.397511	0.0487497	0.961119	0.972215
slc35e1.L	1925.28	0.923547	0.319275	2.89264	0.00382024	0.00942492
med26.L	1308.65	0.900736	0.383968	2.34586	0.0189831	0.0382766
smim7.L	507.104	-1.67077	0.33968	-4.91868	8.71306e-07	4.67698e-06
tmem38a.L	88.2629	-7.84528	1.07254	-7.3147	2.57956e-13	3.83588e-12
topors.L	717.595	1.52499	0.484156	3.1498	0.00163382	0.00444924
LOC121393818	67.1476	-1.24818	0.486242	-2.567	0.0102584	0.0224784
ndufb6.L	147.926	-2.35897	0.450491	-5.23645	1.63696e-07	9.99497e-07
tmem215.L	0	NA	NA	NA	NA	NA
LOC121393820	0.653471	0	4.99758	0	1	NA
LOC121400707	0.172442	1.19978	4.9057	0.244569	0.80679	NA
ptgr1.1.L	412.684	0.170749	0.477723	0.357422	0.720776	0.782771
ptgr1.2.L	4.28972	1.32953	1.75712	0.756656	0.449256	0.53878
ptgr1.3.L	2.43945	1.11298	2.20473	0.504817	0.613687	NA
LOC108696842	0.598358	-3.66113	4.88313	-0.749751	0.453405	NA
LOC108695339	0.475005	1.89937	4.85965	0.390844	0.695913	NA
LOC121393824	0	NA	NA	NA	NA	NA
LOC121393822	0	NA	NA	NA	NA	NA
LOC121393825	0.0699199	0	4.99758	0	1	NA
txn.L	16.4014	-8.78592	1.71923	-5.11037	3.21532e-07	1.86519e-06
lpar1.L	95.0313	-1.5437	0.656605	-2.35103	0.0187217	0.0378227
LOC108695348	15.3047	-6.25128	1.758	-3.55589	0.000376695	0.00119852
svep1.L	17.008	-7.33716	1.79542	-4.08659	4.37759e-05	0.000169043
LOC100037235	79.8831	-1.75283	0.469816	-3.73089	0.000190806	0.000648217
LOC108713682	0.221446	0.3112	4.98857	0.0623826	0.950258	NA
plppr1.L	5.37108	-7.20309	2.41824	-2.97865	0.00289523	0.00738075
ddx58.L	1.143	1.22033	3.3935	0.359607	0.719141	NA
aco1.L	182.458	1.01538	0.421128	2.41109	0.0159049	0.0328775
LOC108713715	323.486	0.0431328	0.707662	0.0609511	0.951398	0.965497
LOC108713726	6.46202	0.819537	1.53094	0.535315	0.592432	0.671115
LOC121393836	0.175936	0.493178	4.97699	0.0990916	0.921066	NA
bnc2.L	2.86166	-1.98255	2.23832	-0.885732	0.375762	0.467126
LOC121393842	0.216831	0.311201	4.98857	0.0623827	0.950258	NA
LOC108713754	0.196852	1.37075	4.89236	0.280183	0.779337	NA
cntln.L	433.876	3.19579	0.648011	4.93168	8.15242e-07	4.40329e-06
sh3gl2.L	214.756	0.542891	0.435806	1.24572	0.212868	0.294935
LOC108696854	5.31137	1.51207	1.70234	0.88823	0.374417	0.465837
adamtsl1.2.L	43.312	-1.33356	0.752738	-1.77161	0.0764598	0.125544
haus6.L	577.572	1.17963	0.454882	2.59326	0.00950701	0.0210125
dennd4c.L	1612.02	2.19351	0.291417	7.52704	5.19039e-14	8.4208e-13
plin2.L	1396.71	2.76235	0.462369	5.97433	2.31035e-09	1.9363e-08
opn3.L	9.30727	-3.13072	1.34729	-2.32372	0.0201403	0.0403069
rps6.L	4284.91	-3.28259	0.477033	-6.88127	5.93202e-12	7.21014e-11
acer2.L	304.123	0.376563	0.371197	1.01446	0.310365	0.400785
LOC108695376	0.693639	-2.13624	4.44252	-0.480863	0.630614	NA
mllt3.L	353.595	0.0951347	0.569329	0.1671	0.867292	0.901159
focad.L	554.378	-0.0112438	0.408228	-0.0275431	0.978027	0.984001
LOC108713839	27.3438	-0.624585	0.790828	-0.789786	0.429653	0.520064
LOC121400709	0	NA	NA	NA	NA	NA
nipsnap3a.L	126.19	1.62243	0.572904	2.83194	0.00462672	0.0111596
abca1.L	94.5628	-2.02571	0.633231	-3.199	0.00137904	0.00382914
LOC108713854	10.3666	1.58451	1.21353	1.30571	0.191651	0.270669
slc44a1.L	2719.52	1.35492	0.241097	5.6198	1.91178e-08	1.38464e-07
fsd1l.L	290.629	-1.19359	0.532254	-2.24252	0.0249276	0.0483953
LOC121393901	2.00183	-4.17517	3.41764	-1.22165	0.221839	NA
tmem38b.L	372.724	1.26792	0.30717	4.12775	3.66324e-05	0.000143654
znf462.L	1729.46	-1.12529	0.600513	-1.87388	0.0609467	0.103804
rad23b.L	1975.1	-0.516114	0.275721	-1.87187	0.0612243	0.104215
klf4.L	142.351	1.70713	0.68915	2.47715	0.0132436	0.0280421
mtap.L	261.793	0.0282575	0.483974	0.0583864	0.953441	0.966853
cdkn2b.L	2.1215	-0.101504	2.18747	-0.0464024	0.96299	NA
dmrta1.L	17.148	-8.57537	1.93797	-4.42493	9.64758e-06	4.24373e-05
elavl2.L	641.471	3.15899	0.369198	8.55635	1.16499e-17	3.04077e-16
LOC121401355	0	NA	NA	NA	NA	NA
LOC121393942	13.0523	3.62493	1.36744	2.6509	0.00802781	0.0181485
caap1.L	539.154	0.745039	0.273817	2.72093	0.00650977	0.0151186
plaa.L	628.707	1.08298	0.281847	3.84244	0.000121818	0.000429956
ift74.L	21.1067	-1.05037	0.816027	-1.28718	0.198031	0.278079
LOC108713937	4.76942	2.94446	2.25456	1.306	0.191551	0.270586
tek.L	9.35637	-1.19251	1.57001	-0.759555	0.447521	0.536996
LOC108713948	158.309	1.65464	0.571556	2.89497	0.00379197	0.00936939
mob3b.L	20.1628	-7.63507	1.66368	-4.58926	4.44813e-06	2.0763e-05
c9orf72.L	254.395	-1.15576	0.436669	-2.64677	0.00812652	0.0183351
LOC108695421	0.558681	-3.96898	4.8644	-0.815923	0.414544	NA
LOC108695428	0	NA	NA	NA	NA	NA
LOC108696866	0	NA	NA	NA	NA	NA
LOC108696877	0	NA	NA	NA	NA	NA
LOC108695441	1.51282	2.85715	4.82351	0.592337	0.553625	NA
LOC495995	0.110631	0.493165	4.97699	0.0990889	0.921068	NA
LOC108696887	2.22411	0.220377	2.24352	0.0982283	0.921751	NA
LOC108696894	0.605126	1.52659	4.88147	0.312731	0.754485	NA
LOC108695447	0	NA	NA	NA	NA	NA
LOC108695452	0	NA	NA	NA	NA	NA
LOC108696900	0.110631	0.493165	4.97699	0.0990889	0.921068	NA
lingo2.L	1.77386	-2.42916	2.27898	-1.0659	0.28647	NA
LOC121393971	0	NA	NA	NA	NA	NA
psip1.L	226.077	2.64141	0.441634	5.98099	2.21792e-09	1.86484e-08
snapc3.L	46.0082	0.420227	0.555807	0.756066	0.44961	0.539154
ttc39b.L	188.548	2.00606	0.370579	5.41331	6.18703e-08	4.10727e-07
frem1.L	29.2143	-2.72209	0.85558	-3.18158	0.00146476	0.00403871
LOC108713989	183.768	5.98914	0.764478	7.8343	4.71478e-15	8.80781e-14
zdhhc21.L	127.592	2.8377	0.497652	5.70217	1.18294e-08	8.88672e-08
trnah-gug_37	0	NA	NA	NA	NA	NA
nfib.L	10.5108	-4.32775	1.38813	-3.11768	0.00182278	0.0048972
mpdz.L	273.682	-1.24532	0.579829	-2.14774	0.0317341	0.0595226
LOC108714070	10.0635	-7.5179	1.93641	-3.88238	0.000103437	0.000370407
tyrp1.L	210.954	1.02064	0.451085	2.26263	0.0236584	0.0463322
LOC108714080	2.46912	-3.97142	2.3306	-1.70403	0.088375	NA
ptprd.L	84.8105	-9.59133	3.38539	-2.83315	0.00460913	0.0111255
LOC121394061	30.6161	0.0262893	0.69802	0.0376627	0.969957	0.978454
kdm4c.L	236.566	-0.187082	0.571311	-0.32746	0.74332	0.801811
LOC108705640	2.67353	-0.749726	1.80359	-0.415684	0.677641	0.745477
uhrf2.L	93.7183	1.12131	0.578859	1.93711	0.0527322	0.0918015
kiaa2026.L	215.973	3.35511	0.83114	4.03676	5.41951e-05	0.000204521
fxn.L	50.2378	-1.76639	0.628074	-2.8124	0.00491736	0.0117647
mlana.L	158.871	1.22652	0.426166	2.87803	0.00400165	0.00982684
ermp1.L	675.787	1.53152	0.369707	4.14253	3.43501e-05	0.000135541
ric1.L	269.636	1.80011	0.587225	3.06546	0.00217338	0.00572738
pdcd1lg2.L	27.8025	3.58835	1.09085	3.2895	0.00100364	0.00288435
cd274.L	5.01315	-3.12263	1.4967	-2.08634	0.0369476	0.0678537
plgrkt.L	62.4568	2.37412	0.636038	3.73266	0.000189467	0.000644258
rflb.L	26.1248	4.44048	1.07364	4.13591	3.53547e-05	0.000139104
jak2.L	242.769	2.4941	0.573442	4.34935	1.36544e-05	5.83272e-05
rcl1.L	3494.09	0.0404459	0.404494	0.0999913	0.920351	0.942665
ak3.L	202.205	-1.0037	0.330504	-3.03687	0.00239048	0.00623133
cdc37l1.L	184.188	0.366267	0.363656	1.00718	0.313848	0.404561
spata6l.L	151.393	-1.14123	0.403131	-2.83092	0.00464142	0.0111878
[truncated: 40,639 more rows]
