# Supplementary material for: Insulin Receptor-Related Receptor Regulates the Rate of Early Development in Xenopus laevis
Source: Int J Mol Sci. 2022 Aug 17;23(16):9250. doi: 10.3390/ijms23169250 (PMC9409083; doi:10.3390/ijms23169250)
Supplement: Supplementary file 1 [file ijms-23-09250-s001.zip › supplement file S3.xlsx]

## Sheet: Лист1
	gene	insrr MO1_72/control_72	padj					gene	insrr MO1_85/insrr MO1_72	padj
NM_001090540	mylpf.L	0.149267	9.59613e-52				NM_001090540	mylpf.L	2.94774	6.58011e-13
NM_001096730	act3.L	0.153755	2.09066e-38				NM_001096730	act3.L	1.89429	0.000403888
NM_001097066	MGC64484	0.153755	2.09066e-38				NM_001097066	MGC64484	1.89429	0.000403888
NM_001096757	act2	0.202325	1.20716e-52				NM_001096757	act2	2.32154	1.07951e-08
NM_001085989	myl1.S	0.245254	4.02979e-23				NM_001085989	myl1.S	1.93034	0.000198183
NM_001086195	MGC53823	0.251496	8.76966e-45				NM_001086195	MGC53823	1.98752	2.63844e-06
NM_001087789	col2a1.L	0.257961	1.20111e-28				NM_001087789	col2a1.L	2.07329	3.0985e-06
NM_001093564	des.1.L	0.259931	1.9059e-20				NM_001093564	des.1.L	2.10645	1.84077e-05
NM_001096890	fbxl22.S	0.298959	3.14015e-17				NM_001096890	fbxl22.S	1.93523	0.0001485
NM_001085939	tnnc2.L	0.302184	3.02813e-13				NM_001085939	tnnc2.L	1.68076	0.00569359
NM_001172195	pax6.S	0.303507	6.71623e-29				NM_001172195	pax6.S	2.43309	2.05467e-12
NM_001086708	des.1.S	0.303799	2.3778e-15				NM_001086708	des.1.S	1.9472	8.74545e-05
NM_001091994	smyd1.L	0.308568	1.51186e-17				NM_001091994	smyd1.L	2.21204	6.08587e-07
NM_001127811	tnnt3.L	0.321509	5.44193e-14				NM_001127811	tnnt3.L	2.26215	1.32166e-06
NM_001101759	nr2f5.S	0.322906	1.9362e-11				NM_001101759	nr2f5.S	1.86687	0.00061117
NM_001093627	thbs4.S	0.32412	2.38019e-14				NM_001093627	thbs4.S	1.84836	0.000747021
NM_001088935	klhl41.L	0.327871	3.24407e-14				NM_001088935	klhl41.L	1.66345	0.00646234
NM_001086384	asb12.2.L	0.338417	1.09221e-10				NM_001086384	asb12.2.L	1.89165	0.000475408
NM_001086934	tnnt3.S	0.342104	2.55062e-14				NM_001086934	tnnt3.S	1.82891	0.000710952
NM_001086591	actc1.L	0.348878	9.95624e-33				NM_001086591	actc1.L	1.77842	1.0308e-07
NM_001097706	cacng1.L	0.357281	4.67575e-13				NM_001097706	cacng1.L	1.87864	0.000162329
NM_001096446	frzb.S	2.70713	2.51022e-19				NM_001096446	frzb.S	0.393717	2.70762e-16
NM_001092528	capn9.S	0.377401	4.6903e-10				NM_001092528	capn9.S	1.82585	0.000835031
NM_001086282	snai2.L	0.381358	1.17e-17				NM_001086282	snai2.L	1.613	0.00184743
NM_001095024	ptges3l.L	0.402607	5.32771e-13				NM_001095024	ptges3l.L	1.90227	2.83846e-05
NM_001086060	ckmt1b.S	0.404585	3.2736e-07				NM_001086060	ckmt1b.S	1.65527	0.00495604
NM_001094778	eomes.S	2.41993	2.40145e-12				NM_001094778	eomes.S	0.364616	3.53943e-17
NM_001086783	myl1.L	0.41764	9.61842e-11				NM_001086783	myl1.L	1.54606	0.00579632
NM_001085944	pax6.L	0.427586	1.12385e-10				NM_001085944	pax6.L	2.23604	1.38161e-10
NM_001087148	emp3.L	0.431651	2.41819e-09				NM_001087148	emp3.L	2.16533	2.49023e-09
NM_001085659	hand1.L	0.438146	6.95109e-08				NM_001085659	hand1.L	1.66978	0.0049712
NM_001089117	tspan18.S	0.442149	9.55958e-07				NM_001089117	tspan18.S	1.80796	0.000961112
NM_001094472	tcf15.L	0.450082	3.61265e-10				NM_001094472	tcf15.L	2.09312	6.80525e-08
NM_001092981	arx.L	0.450378	7.453e-06				NM_001092981	arx.L	1.71207	0.00468442
NM_001087189	palmd.L	0.452251	1.14461e-05				NM_001087189	palmd.L	2.31469	1.4248e-06
NM_001095136	xpo6.S	2.19235	3.77482e-08				NM_001095136	xpo6.S	0.671225	0.00937847
NM_001086467	celf3.L	0.459143	2.43234e-08				NM_001086467	celf3.L	1.7047	0.00179821
NM_001089019	vill.L	0.459956	8.01461e-11				NM_001089019	vill.L	2.06549	7.82901e-10
NM_001086312	tnni1.2.L	0.4669	3.97513e-06				NM_001086312	tnni1.2.L	1.70676	0.0034284
NM_001089101	itln1.L	0.469861	6.31494e-06				NM_001089101	itln1.L	1.78797	0.00127219
NM_001136174	sall2.L	0.471232	1.05472e-05				NM_001136174	sall2.L	1.63707	0.00869974
NM_001088331	cer1.S	2.10982	1.02552e-12				NM_001088331	cer1.S	0.541655	3.34699e-09
NM_001092825	ptgds.S	0.474016	2.6549e-05				NM_001092825	ptgds.S	2.01336	4.75489e-05
NM_001087963	xfrp	0.475684	5.21354e-24				NM_001087963	xfrp	1.80735	3.30568e-12
NM_001092867	higd1a.L	0.476284	4.57877e-13				NM_001092867	higd1a.L	2.09997	2.60081e-12
NM_001096223	stoml3.L	0.485865	8.11817e-05				NM_001096223	stoml3.L	2.73543	1.27939e-09
NM_001093327	col9a1.L	0.487422	7.15964e-08				NM_001093327	col9a1.L	1.67948	0.00029486
NM_001086874	p2ry4.L	0.491939	2.83533e-09				NM_001086874	p2ry4.L	2.00795	9.46965e-08
NM_001085581	mespa.S	0.492084	6.41959e-10				NM_001085581	mespa.S	1.68138	0.000321516
NM_001095906	cdk5r2.S	2.03004	0.000133764				NM_001095906	cdk5r2.S	0.572451	0.00304694
NM_001086491	sept12.S	0.493189	2.34641e-15				NM_001086491	sept12.S	1.56805	4.64841e-05
NM_001174017	hoxb9	0.495009	5.88756e-07				NM_001174017	hoxb9	1.66325	0.000409013
NM_001096843	MGC154351	0.495154	3.61265e-10				NM_001096843	MGC154351	2.01035	9.87419e-12
NM_001094003	unc45b.S	0.499393	3.06754e-08				NM_001094003	unc45b.S	1.52405	0.00310471
NM_001092613	neu1.L	1.99586	6.09811e-05				NM_001092613	neu1.L	0.558266	0.000966902
NM_001086649	mfap2.L	0.501805	2.03671e-10				NM_001086649	mfap2.L	1.92747	3.64309e-07
NM_001094201	ccna1.L	1.98714	0.000153636				NM_001094201	ccna1.L	0.483042	3.43515e-05
NM_001246315	LOC100653508	0.503434	1.50457e-08				NM_001246315	LOC100653508	1.68198	0.000167081
NM_001091428	gramd1c.L	1.97289	5.99997e-14				NM_001091428	gramd1c.L	0.695808	0.00165557
NM_001086152	slc22a15.2.S	1.97282	4.88855e-06				NM_001086152	slc22a15.2.S	0.630416	0.00511698
NM_001085590	hhex.L	1.97108	8.34926e-07				NM_001085590	hhex.L	0.617392	0.000849748
NM_001090193	chm.L	1.96892	3.79011e-06				NM_001090193	chm.L	0.55855	0.000183439
NM_001085816	mmp21.L	0.514326	2.51417e-07				NM_001085816	mmp21.L	1.98466	8.78267e-07
NM_001087487	ppp2r2b.L	1.93078	0.000210535				NM_001087487	ppp2r2b.L	0.520203	0.000200874
NM_001086563	ywhag.L	1.93059	0.000198521				NM_001086563	ywhag.L	0.504755	0.000133189
NM_001086363	pou5f3.2.L	1.92829	2.29357e-12				NM_001086363	pou5f3.2.L	0.510298	2.60101e-12
NM_001094217	dctn2.L	1.92011	1.75033e-15				NM_001094217	dctn2.L	0.584875	1.6524e-08
NM_001086283	sparc.L	0.5231	1.02552e-12				NM_001086283	sparc.L	1.54232	0.000149921
NM_001088746	olfm4.L	0.523617	6.04351e-07				NM_001088746	olfm4.L	1.43082	0.00907656
NM_001085886	kcp.L	0.525563	4.89753e-07				NM_001085886	kcp.L	1.57081	0.00235762
NM_001127798	hoxc8.S	0.530522	2.59041e-09				NM_001127798	hoxc8.S	1.60074	7.52953e-05
NM_001091730	bcar3.L	0.539145	6.14686e-10				NM_001091730	bcar3.L	1.69665	1.40945e-06
NM_001086121	sparc.S	0.540528	5.06535e-06				NM_001086121	sparc.S	1.77658	1.0896e-05
NM_001174037	sox5.S	0.541639	1.10957e-05				NM_001174037	sox5.S	1.52452	0.00729518
NM_001088341	eomes.L	1.84219	1.77099e-07				NM_001088341	eomes.L	0.547916	4.7316e-08
NM_001086613	cd81.L	0.544059	2.01442e-10				NM_001086613	cd81.L	1.42962	0.00873578
NM_001093459	pgk1.L	1.82845	2.01746e-07				NM_001093459	pgk1.L	0.59197	5.55539e-06
NM_001088991	rdd4.L	0.547539	1.8951e-06				NM_001088991	rdd4.L	1.64048	0.00538682
NM_001097913	grip2.L	1.8048	1.27588e-05				NM_001097913	grip2.L	0.489072	1.29975e-07
NM_001199796	pcdh8l.S	0.555209	1.93417e-08				NM_001199796	pcdh8l.S	1.57631	6.11851e-05
NM_001089226	ppp1r1a.L	0.555853	3.82562e-07				NM_001089226	ppp1r1a.L	1.69645	3.45051e-05
NM_001088993	rdd2.L	0.558592	6.1597e-10				NM_001088993	rdd2.L	2.29873	3.68228e-15
NM_001088313	shh.L	0.560456	4.63873e-07				NM_001088313	shh.L	1.5905	0.000563136
NM_001090779	brca1.L	1.77994	2.37054e-12				NM_001090779	brca1.L	0.644194	1.84733e-06
NM_001092998	pcsk6.L	1.77854	0.000135188				NM_001092998	pcsk6.L	0.545461	1.12353e-05
NM_001088725	spam1.L	0.565072	0.00305923				NM_001088725	spam1.L	1.85362	0.000803135
NM_001087560	aifm3.L	0.565966	1.62983e-07				NM_001087560	aifm3.L	2.05401	2.14734e-08
NM_001096505	rnf138.S	1.76532	0.00319106				NM_001096505	rnf138.S	0.526905	0.000386136
NM_001088291	mixer.L	1.76349	5.16915e-05				NM_001088291	mixer.L	0.450697	1.24151e-11
NM_001088365	bix1.3.S	1.75972	0.0021818				NM_001088365	bix1.3.S	0.517535	0.000216411
NM_001095879	mfsd4b.S	1.75498	1.68761e-05				NM_001095879	mfsd4b.S	0.597256	0.000279992
NM_001094303	appl2.L	1.75452	4.11416e-05				NM_001094303	appl2.L	0.673991	0.00790812
NM_001096868	rdh9	1.75243	0.000605219				NM_001096868	rdh9	0.5962	0.00261776
NM_001091415	parp9.L	1.75176	0.00373856				NM_001091415	parp9.L	0.596103	0.00649507
NM_001090254	rara.L	0.57234	1.33931e-05				NM_001090254	rara.L	1.56296	0.000122404
NM_001087887	mdk.S	0.576097	3.5895e-21				NM_001087887	mdk.S	1.4498	3.13723e-06
NM_001090259	xhoxc8	0.578495	5.72912e-05				NM_001090259	xhoxc8	1.49074	0.00219719
NM_001171969	cr1b	1.72683	7.00394e-05				NM_001171969	cr1b	0.652691	0.00412641
NM_001095627	hes5.1.S	0.58053	7.89874e-05				NM_001095627	hes5.1.S	1.4994	0.00635713
NM_001097783	spib.S	0.581885	0.00533599				NM_001097783	spib.S	1.65212	0.00792665
NM_001096895	LOC733474.L	0.584399	1.04238e-10				NM_001096895	LOC733474.L	1.50357	4.99949e-05
NM_001086198	ag1.L	0.584809	3.20385e-06				NM_001086198	ag1.L	1.44086	0.00165084
NM_001094156	fam46b.S	1.7005	0.00283089				NM_001094156	fam46b.S	0.596178	0.00458218
NM_001088989	LOC100496293.L	0.589169	1.65231e-09				NM_001088989	LOC100496293.L	1.47057	0.00118182
NM_001093348	enpp6.L	1.68494	0.000130828				NM_001093348	enpp6.L	0.569501	3.09194e-05
NM_001091819	jak2.L	1.68413	0.00115941				NM_001091819	jak2.L	0.560597	0.000960204
NM_001135062	rdd3.L	0.594102	0.00237805				NM_001135062	rdd3.L	1.66893	0.00353594
NM_001088754	tyro3.L	1.68251	0.000168035				NM_001088754	tyro3.L	0.637143	0.00447722
NM_001096130	MGC115657	1.6824	8.79185e-05				NM_001096130	MGC115657	0.64718	0.00409611
NM_001086410	MGC69098	1.67912	1.47036e-05				NM_001086410	MGC69098	0.559884	1.39402e-06
NM_001171699	gng10.L	1.67735	0.00625626				NM_001171699	gng10.L	0.534499	0.000578296
NM_001087123	ttyh2.S	0.596771	0.000579482				NM_001087123	ttyh2.S	1.61194	0.00292918
NM_001095951	cpeb1.S	1.67059	0.00652939				NM_001095951	cpeb1.S	0.591386	0.00579632
NM_001093594	mmp3.L	0.598974	0.00809922				NM_001093594	mmp3.L	2.15637	8.87241e-06
NM_001091692	slc2a9.S	1.66342	0.000195492				NM_001091692	slc2a9.S	0.67862	0.00127507
NM_001091691	glce.L	1.6551	0.00149668				NM_001091691	glce.L	0.648077	0.00873578
NM_001094903	LOC100497709.L	1.65464	0.00817001				NM_001094903	LOC100497709.L	0.626532	0.00801119
NM_001085895	nr1i2.L	1.65421	0.000152772				NM_001085895	nr1i2.L	0.66157	0.000412902
NM_001136167	caskin2.L	0.607316	3.6841e-08				NM_001136167	caskin2.L	1.46846	0.000198421
NM_001088715	tk2.S	1.64534	0.000444852				NM_001088715	tk2.S	0.605031	0.000578296
NM_001114803	cdknx.L	0.608286	9.25415e-14				NM_001114803	cdknx.L	1.48334	3.01712e-06
NM_001092832	cfap45.L	0.608367	9.15619e-05				NM_001092832	cfap45.L	1.55095	0.0034284
NM_001085945	slc18a1.S	0.609148	0.000791278				NM_001085945	slc18a1.S	1.57499	0.00134909
NM_001088345	nde1.L	1.64123	0.000446444				NM_001088345	nde1.L	0.561064	3.81766e-06
NM_001091597	enosf1.S	1.63992	0.00348731				NM_001091597	enosf1.S	0.533983	3.50555e-05
NM_001091098	ldlrap1.S	1.63515	0.000114338				NM_001091098	ldlrap1.S	0.555257	2.11094e-12
NM_001093269	herc4.S	1.62808	0.000697529				NM_001093269	herc4.S	0.529184	1.76774e-07
NM_001094427	ppp1r14c.L	1.62283	0.00177373				NM_001094427	ppp1r14c.L	0.595643	0.00153732
NM_001094486	plin2.S	1.61538	8.53424e-05				NM_001094486	plin2.S	0.577199	3.26371e-07
NM_001086098	xaldb	0.619664	3.27273e-06				NM_001086098	xaldb	1.54206	4.60858e-05
NM_001096088	MGC115675	1.61031	0.000251022				NM_001096088	MGC115675	0.65797	0.00506962
NM_001091273	eml2.L	1.60574	6.04351e-07				NM_001091273	eml2.L	0.731617	0.00511698
NM_001114834	fblim1.S	0.624137	1.20783e-06				NM_001114834	fblim1.S	1.66498	1.30877e-09
NM_001095403	qrich1l.S	1.59874	0.00274556				NM_001095403	qrich1l.S	0.651893	0.00511698
NM_001087625	mixl1.L	1.59394	0.00571381				NM_001087625	mixl1.L	0.483859	2.09441e-06
NM_001127749	ska3.L	1.59322	1.43069e-06				NM_001127749	ska3.L	0.629878	1.11847e-05
NM_001088196	vegt.L	1.59088	1.05863e-05				NM_001088196	vegt.L	0.624099	1.95455e-06
NM_001136170	pld1.L	1.58898	0.000477151				NM_001136170	pld1.L	0.660582	0.00503722
NM_001096023	stk35.S	1.58598	0.00188249				NM_001096023	stk35.S	0.624842	0.00334827
NM_001092549	csnk1g2.L	1.58543	1.96936e-06				NM_001092549	csnk1g2.L	0.626272	5.04315e-06
NM_001088775	cuedc2.S	1.58415	0.00128893				NM_001088775	cuedc2.S	0.639168	0.00396106
NM_001101749	gjb1.L	0.634398	4.50714e-08				NM_001101749	gjb1.L	1.51679	2.09441e-06
NM_001094501	ncdn.S	1.57287	0.000251608				NM_001094501	ncdn.S	0.688502	0.00632656
NM_001093579	sept6.L	1.5712	0.0010598				NM_001093579	sept6.L	0.535762	9.40046e-06
NM_001171577	atp6v0e1.S	1.56563	4.07719e-07				NM_001171577	atp6v0e1.S	0.675479	0.000167081
NM_001091885	gtf2i.S	1.55739	0.00136207				NM_001091885	gtf2i.S	0.64052	0.00295165
NM_001086191	plin3.L	1.55047	4.49906e-05				NM_001086191	plin3.L	0.659877	7.38454e-05
NM_001091468	tuba1a.L	1.55016	6.90134e-05				NM_001091468	tuba1a.L	0.679148	4.86517e-05
NM_001136166	ptch2.L	0.645179	0.000233192				NM_001136166	ptch2.L	1.44854	0.00912282
NM_001091614	tbc1d5.L	1.54283	0.000388491				NM_001091614	tbc1d5.L	0.689919	0.00179821
NM_001097757	bloc1s5.L	1.54254	0.00194165				NM_001097757	bloc1s5.L	0.659872	0.00651099
NM_001090809	hras.L	1.54158	0.0025151				NM_001090809	hras.L	0.601316	0.000778715
NM_001096559	clpx.L	1.53665	1.47063e-05				NM_001096559	clpx.L	0.691686	0.000757434
NM_001092345	asmtl.L	1.53469	3.56448e-05				NM_001092345	asmtl.L	0.597214	1.40415e-06
NM_001093490	rcn3.L	0.652093	5.29783e-07				NM_001093490	rcn3.L	1.36876	0.00254831
NM_001090799	kif3a.L	1.53151	0.00641828				NM_001090799	kif3a.L	0.562172	3.76912e-06
NM_001112854	egln3.L	0.653383	2.51622e-05				NM_001112854	egln3.L	1.41939	0.00585493
NM_001091829	bmt2.S	1.52688	3.40732e-05				NM_001091829	bmt2.S	0.741171	0.00799048
NM_001090143	ccdc63.L	0.655359	0.00727109				NM_001090143	ccdc63.L	1.74817	0.000155655
NM_001093608	hace1.L	1.52466	0.00496406				NM_001093608	hace1.L	0.629882	0.00386664
NM_001088148	foxi4.2.L	1.52389	0.000263973				NM_001088148	foxi4.2.L	0.593974	4.9147e-07
NM_001094664	timm21.L	1.52204	0.0034019				NM_001094664	timm21.L	0.627898	0.00239817
NM_001092232	dbr1.L	1.51992	6.00679e-06				NM_001092232	dbr1.L	0.590034	9.54513e-13
NM_001087223	gamt.S	0.661512	2.12781e-05				NM_001087223	gamt.S	1.32801	0.00202987
NM_001089771	oxct1.L	1.51136	0.00625626				NM_001089771	oxct1.L	0.587105	1.47714e-05
NM_001096776	arih2.L	1.50677	5.48293e-05				NM_001096776	arih2.L	0.69802	0.00140012
NM_001096784	frzb	1.50593	0.000138088				NM_001096784	frzb	0.616111	5.30763e-06
NM_001088106	tuba3d	1.5057	0.00452122				NM_001088106	tuba3d	0.521544	3.34699e-09
NM_001094152	strn.S	1.50419	1.21256e-06				NM_001094152	strn.S	0.746525	0.0045582
NM_001086112	emp2.L	0.664853	5.22023e-05				NM_001086112	emp2.L	1.37358	0.0018741
NM_001098701	krtcap2.L	0.665338	0.000693079				NM_001098701	krtcap2.L	1.62367	0.00011084
NM_001090815	clic4.S	1.4994	0.00086439				NM_001090815	clic4.S	0.60107	0.000200874
NM_001087361	ube2n.S	0.668951	0.000123784				NM_001087361	ube2n.S	1.44273	0.000978374
NM_001171974	hyal2.L	0.669961	6.51453e-05				NM_001171974	hyal2.L	1.37587	0.00654901
NM_001089208	pdlim1.L	0.670656	1.62983e-07				NM_001089208	pdlim1.L	1.36836	0.000641895
NM_001095072	glipr2.S	0.670887	1.24601e-06				NM_001095072	glipr2.S	1.34035	0.00257436
NM_001087823	myod1.L	0.67379	9.37416e-05				NM_001087823	myod1.L	1.47416	0.000325541
NM_001086736	rpl10a.S	0.675344	1.23587e-07				NM_001086736	rpl10a.S	1.35685	0.000190028
NM_001092125	gtf3c6.L	1.48021	0.00643341				NM_001092125	gtf3c6.L	0.672771	0.00310471
NM_001095637	rpsa.L	0.676924	1.52309e-05				NM_001095637	rpsa.L	1.31081	0.00661365
NM_001091705	pitpna.S	1.47255	0.00427803				NM_001091705	pitpna.S	0.568731	7.46658e-05
NM_001088454	wdr1.L	1.47195	0.000547341				NM_001088454	wdr1.L	0.686375	0.000327227
NM_001094810	plod1.L	0.680252	0.00160196				NM_001094810	plod1.L	2.07599	1.001e-11
NM_001088881	birc5.1.S	1.46854	0.00502618				NM_001088881	birc5.1.S	0.575863	5.17068e-05
NM_001096538	cenpa.L	1.4675	0.00180774				NM_001096538	cenpa.L	0.708875	0.009597
NM_001086437	hist1h2am.L	1.46602	0.00172615				NM_001086437	hist1h2am.L	0.667121	0.00182112
NM_001087546	hoxc6.S	0.682364	0.00296121				NM_001087546	hoxc6.S	1.48472	0.00155469
NM_001086777	slc3a2.S	0.683038	0.00749932				NM_001086777	slc3a2.S	1.4363	0.00464947
NM_001091987	uba52.L	0.686446	7.99426e-09				NM_001091987	uba52.L	1.33745	0.000257475
NM_001089059	otog.L	0.686473	0.000251608				NM_001089059	otog.L	1.70157	6.75721e-09
NM_001096512	vps35.S	1.45601	4.96418e-06				NM_001096512	vps35.S	0.694452	4.62682e-05
NM_001086969	fkbp9.L	0.687447	3.2621e-07				NM_001086969	fkbp9.L	1.34155	0.000615658
NM_001087059	fbp1.L	0.688358	1.83578e-07				NM_001087059	fbp1.L	1.30041	0.00155917
NM_001088257	fcp1	1.45262	2.72308e-06				NM_001088257	fcp1	0.725372	0.000225694
NM_001088556	frzb2.L	1.45108	0.000761468				NM_001088556	frzb2.L	0.718706	0.00135488
NM_001087833	msi1.L	0.689161	6.89085e-08				NM_001087833	msi1.L	1.35976	8.945e-05
NM_001127726	LOC100158267.L	0.689684	0.00404264				NM_001127726	LOC100158267.L	2.04922	7.01063e-13
NM_001122875	kcnq1.L	0.689711	3.57285e-05				NM_001122875	kcnq1.L	1.42739	0.000497538
NM_001094529	cnrip1.L	1.44978	0.00496406				NM_001094529	cnrip1.L	0.644053	0.000857091
NM_001087463	pgat.L	0.690307	8.53988e-06				NM_001087463	pgat.L	1.46989	3.60447e-05
NM_001096699	LOC779013	1.44516	2.6549e-05				NM_001096699	LOC779013	0.729658	0.000747021
NM_001089252	rpl4.S	0.692097	3.56448e-05				NM_001089252	rpl4.S	1.28598	0.00980555
NM_001091594	ppm1b.S	1.44472	0.000101235				NM_001091594	ppm1b.S	0.702417	0.000593319
NM_001090261	frzb-1	1.44231	0.00080581				NM_001090261	frzb-1	0.615463	4.13742e-07
NM_001089089	casc3.S	0.694014	2.9213e-05				NM_001089089	casc3.S	1.31039	0.00597899
NM_001099862	palm.S	0.694183	2.87177e-05				NM_001099862	palm.S	1.31001	0.00597899
NM_001096963	cdca7l.L	1.43983	0.00730649				NM_001096963	cdca7l.L	0.552976	3.26371e-07
NM_001127736	arhgap36.L	0.695032	0.00122553				NM_001127736	arhgap36.L	1.50483	0.00310482
NM_001093844	rab40b.L	1.43788	0.000286976				NM_001093844	rab40b.L	0.715761	0.00502497
NM_001086730	slc25a1.L	0.695832	8.11817e-05				NM_001086730	slc25a1.L	1.39404	0.00038557
NM_001086376	xk81a1.L	0.696031	0.00285713				NM_001086376	xk81a1.L	1.6536	1.29267e-06
NM_001095142	cpne3.L	0.69735	0.000643521				NM_001095142	cpne3.L	1.46909	0.000154775
NM_001094373	llgl2.L	1.42762	3.82951e-05				NM_001094373	llgl2.L	0.746336	0.00193858
NM_001088590	dync1li1.S	1.42759	0.000263973				NM_001088590	dync1li1.S	0.643756	5.698e-05
NM_001095075	kif23.S	1.42192	2.35073e-05				NM_001095075	kif23.S	0.76118	0.000644369
NM_001093012	rps8.L	0.704745	3.71199e-05				NM_001093012	rps8.L	1.37166	0.000341596
NM_001090934	nup88.L	1.4158	0.00014608				NM_001090934	nup88.L	0.739322	0.000229434
NM_001093500	zc3h7b.L	1.41523	0.00165623				NM_001093500	zc3h7b.L	0.736309	0.00582346
NM_001122880	retsat.L	0.706797	0.000825989				NM_001122880	retsat.L	1.51604	3.15942e-05
NM_001091523	krt19.L	0.708443	8.11817e-05				NM_001091523	krt19.L	1.28906	0.00876151
NM_001085661	ccnd2.L	1.41111	0.00132924				NM_001085661	ccnd2.L	0.708855	0.00694614
NM_001086778	sdhb.S	0.709469	0.00090923				NM_001086778	sdhb.S	1.46318	7.38454e-05
NM_001085897	myod1.S	0.71081	6.09811e-05				NM_001085897	myod1.S	1.37557	0.000626162
NM_001091336	habp4.S	1.4066	0.0007204				NM_001091336	habp4.S	0.658272	1.65244e-05
NM_001090597	ptk2.L	1.40513	0.000605219				NM_001090597	ptk2.L	0.721538	0.00317716
NM_001092198	b3gnt7.S	0.711772	3.97684e-05				NM_001092198	b3gnt7.S	1.29133	0.00735429
NM_001093847	rpl38.L	0.712022	3.18009e-07				NM_001093847	rpl38.L	1.40425	1.30094e-05
NM_001087217	gnb3.S	0.714016	0.000190466				NM_001087217	gnb3.S	1.62919	4.7316e-08
NM_001097803	casp7.S	1.39839	0.00125064				NM_001097803	casp7.S	0.722884	0.00840185
NM_001127750	zpr1.L	1.39698	4.91179e-07				NM_001127750	zpr1.L	0.72631	9.64194e-05
NM_001093830	rpl23a.L	0.716965	8.5285e-05				NM_001093830	rpl23a.L	1.3556	0.000750785
NM_001086269	rpl28.L	0.717379	1.81263e-07				NM_001086269	rpl28.L	1.32292	0.00127964
NM_001114802	marcksl1.L	1.39215	2.20269e-10				NM_001114802	marcksl1.L	0.778164	0.00418509
NM_001095158	adamts1.L	1.39045	0.00595732				NM_001095158	adamts1.L	0.591143	3.34093e-07
NM_001087341	krt18.L	0.719947	7.16875e-07				NM_001087341	krt18.L	1.29582	0.000185322
NM_001088319	xicl	0.720095	2.68813e-07				NM_001088319	xicl	1.38672	4.17145e-05
NM_001087983	gata6.S	0.720752	0.00561115				NM_001087983	gata6.S	1.38064	0.0043177
NM_001091571	syap1.L	1.38718	0.00147487				NM_001091571	syap1.L	0.630729	0.00023813
NM_001091212	sesn2.L	1.38666	2.21637e-06				NM_001091212	sesn2.L	0.785448	0.0034284
NM_001090161	rplp1.L	0.721341	0.000234688				NM_001090161	rplp1.L	1.31594	0.00392409
NM_001088026	wdhd1.L	1.38489	0.000191032				NM_001088026	wdhd1.L	0.747461	0.00873578
NM_001087056	krt8.S	0.722397	7.89874e-05				NM_001087056	krt8.S	1.31153	0.00179821
NM_001110740	rps3a.L	0.723757	0.00010243				NM_001110740	rps3a.L	1.30348	0.00352112
NM_001095310	eif3h.S	0.724941	0.000375972				NM_001095310	eif3h.S	1.31761	0.00463997
NM_001086147	vill.S	0.725451	0.000860221				NM_001086147	vill.S	1.34344	0.00395346
NM_001093842	rpl34	0.725817	0.000167388				NM_001093842	rpl34	1.33401	0.00218015
NM_001090521	impdh2.L	0.728008	1.86876e-05				NM_001090521	impdh2.L	1.63526	8.09196e-12
NM_001086537	dctn1.L	1.37278	0.00360639				NM_001086537	dctn1.L	0.746799	0.00506962
NM_001095473	tspan1.L	1.37001	0.000692648				NM_001095473	tspan1.L	0.690248	0.000435267
NM_001095941	mtm1.S	1.36944	0.00496401				NM_001095941	mtm1.S	0.687584	0.000176316
NM_001088202	vegt.S	1.36932	0.00746423				NM_001088202	vegt.S	0.578158	1.6524e-08
NM_001096483	eml4.S	1.36795	0.000565599				NM_001096483	eml4.S	0.75224	0.00714737
NM_001090896	gnai1.S	1.36738	2.91679e-05				NM_001090896	gnai1.S	0.775198	0.00629028
NM_001096198	pus7.L	1.36538	1.99421e-06				NM_001096198	pus7.L	0.800114	0.00778637
NM_001090928	iars.S	1.36325	0.00702703				NM_001090928	iars.S	0.690269	0.000309025
NM_001086856	rps3a.S	0.736477	0.00365576				NM_001086856	rps3a.S	1.3369	0.00423678
NM_001092112	arrb2.L	1.35397	0.00040495				NM_001092112	arrb2.L	0.777638	0.00676301
NM_001127872	nsmce4a.L	1.34897	0.00450334				NM_001127872	nsmce4a.L	0.709344	0.000239456
NM_001088680	tdrd6.L	1.34832	0.00374918				NM_001088680	tdrd6.L	0.709399	0.00244158
NM_001094124	nans.L	1.34187	0.00262055				NM_001094124	nans.L	0.724302	0.00164237
NM_001093681	p3h4.L	0.746087	0.0057748				NM_001093681	p3h4.L	1.32504	0.00930805
NM_001127828	kmt5a.S	1.34024	0.000860221				NM_001127828	kmt5a.S	0.672254	2.17481e-07
NM_001168380	LOC100127312	1.33924	0.00658285				NM_001168380	LOC100127312	0.715064	0.00527749
NM_001094021	galnt11.S	1.33601	0.00462792				NM_001094021	galnt11.S	0.681867	4.75489e-05
NM_001087241	krt.L	0.751721	0.00251806				NM_001087241	krt.L	1.49686	7.19148e-06
NM_001093853	rpl36a.L	0.752184	1.59427e-05				NM_001093853	rpl36a.L	1.30282	0.000475303
NM_001089623	rrbp1.L	0.757387	0.00933658				NM_001089623	rrbp1.L	1.4115	0.000835031
NM_001086944	gclm.L	1.31759	0.00419767				NM_001086944	gclm.L	0.719302	0.000973312
NM_001086993	psmd6.L	0.759649	1.25795e-05				NM_001086993	psmd6.L	1.23545	0.00779265
NM_001094674	LOC494849	0.759942	0.000761468				NM_001094674	LOC494849	1.34694	0.00104499
NM_001088102	parp1.L	0.761738	3.57285e-05				NM_001088102	parp1.L	1.24751	0.00407249
NM_001092464	rps17.L	0.762456	0.00146469				NM_001092464	rps17.L	1.29505	0.00423678
NM_001166299	rpl17.L	0.763089	0.00105973				NM_001166299	rpl17.L	1.32032	0.00142437
NM_001085968	rpl5.L	0.763653	0.000639372				NM_001085968	rpl5.L	1.25008	0.00855712
NM_001092596	rps27a.S	0.764133	0.000181806				NM_001092596	rps27a.S	1.28594	0.00200582
NM_001094775	akt1s1.L	1.30765	9.5641e-07				NM_001094775	akt1s1.L	0.745133	3.55096e-05
NM_001096672	trmt6.L	0.765875	0.000951527				NM_001096672	trmt6.L	1.32214	0.000899795
NM_001086826	serbp1.L	0.769892	0.00123051				NM_001086826	serbp1.L	1.25517	0.00503722
NM_001096477	srsf11.L	0.77002	8.11817e-05				NM_001096477	srsf11.L	1.36264	4.86517e-05
NM_001171777	serp1.S	0.770938	0.00718702				NM_001171777	serp1.S	1.33872	0.00356622
NM_001086842	eif5.S	0.771695	0.00259702				NM_001086842	eif5.S	1.34801	0.000435267
NM_001092903	MGC82136	0.774299	0.000200857				NM_001092903	MGC82136	1.27324	0.00150153
NM_001091550	jpt2.L	1.29083	0.00137293				NM_001091550	jpt2.L	0.782847	0.00915202
NM_001094935	rrs1.S	0.775966	0.000145415				NM_001094935	rrs1.S	1.24538	0.00832902
NM_001174030	ebna1bp2-a	0.776827	0.000613417				NM_001174030	ebna1bp2-a	1.26095	0.00286021
NM_001086664	gnb2l1	0.777287	0.00135611				NM_001086664	gnb2l1	1.26525	0.00472054
NM_001096737	rpl18a.S	0.778006	0.00128465				NM_001096737	rpl18a.S	1.24368	0.00917059
NM_001095664	sema6d.L	0.779047	0.00582197				NM_001095664	sema6d.L	1.28948	0.00984587
NM_001089212	rpl18.S	0.779875	0.0012371				NM_001089212	rpl18.S	1.25772	0.00794225
NM_001086378	aplnr.S	0.780031	0.00768235				NM_001086378	aplnr.S	1.29543	0.00423678
NM_001086212	ssr2.L	0.782179	0.00679302				NM_001086212	ssr2.L	1.34801	0.000992129
NM_001087413	rps2.L	0.782895	0.000200857				NM_001087413	rps2.L	1.39174	9.09598e-07
NM_001087993	hspa5.L	0.783746	0.00930705				NM_001087993	hspa5.L	1.42343	4.75489e-05
NM_001172177	hspa5b	0.78385	0.00937879				NM_001172177	hspa5b	1.42342	4.75489e-05
NM_001088413	surf6.L	0.784006	0.00103063				NM_001088413	surf6.L	1.27554	0.00671639
NM_001094442	tmem263.L	0.784023	0.000279838				NM_001094442	tmem263.L	1.36969	7.30856e-05
NM_001090657	csnk2b.S	0.785176	0.00482635				NM_001090657	csnk2b.S	1.3367	9.64194e-05
NM_001086954	rpl27.L	0.785674	0.00024753				NM_001086954	rpl27.L	1.2676	0.00206091
NM_001092909	pithd1.L	0.786275	0.00984401				NM_001092909	pithd1.L	1.3164	0.00513792
NM_001090578	tbxt.S	1.26991	0.00761804				NM_001090578	tbxt.S	0.764855	0.000925471
NM_001086599	hspa1l.S	0.788936	0.00106733				NM_001086599	hspa1l.S	1.34434	0.000114151
NM_001086752	copb2.S	0.791658	0.00409812				NM_001086752	copb2.S	1.27952	0.00137142
NM_001092921	rpl6.S	0.792549	0.00122966				NM_001092921	rpl6.S	1.30389	0.000450549
NM_001087187	eef2.1.L	0.792631	0.000184039				NM_001087187	eef2.1.L	1.28002	0.000925471
NM_001172185	hsc70.ii	0.792983	0.000565599				NM_001172185	hsc70.ii	1.37158	7.42726e-06
NM_001086163	hspa8.L	0.793032	0.000565599				NM_001086163	hspa8.L	1.37151	7.42726e-06
NM_001087152	rpl30.S	0.795064	0.00907014				NM_001087152	rpl30.S	1.27135	0.00753401
NM_001087779	atp1b3.S	0.795643	7.20991e-05				NM_001087779	atp1b3.S	1.2518	0.00202616
NM_001091472	rps4x.L	0.796722	0.000596547				NM_001091472	rps4x.L	1.23526	0.00675561
NM_001087255	snu13.L	0.798356	0.00958303				NM_001087255	snu13.L	1.28664	0.00156653
NM_001095128	thg1l.L	0.800274	0.00242667				NM_001095128	thg1l.L	1.24434	0.00985267
NM_001086687	sec61b.L	0.800495	0.0018817				NM_001086687	sec61b.L	1.25471	0.00343483
NM_001086054	tuba3c.S	0.801678	0.00191934				NM_001086054	tuba3c.S	1.25873	0.00134723
NM_001095671	atf4.S	0.80575	0.00702703				NM_001095671	atf4.S	1.30775	0.00228556
NM_001095638	atf4-iii	0.80575	0.00702703				NM_001095638	atf4-iii	1.30775	0.00228556
NM_001098440	LOC780741	0.808784	8.53424e-05				NM_001098440	LOC780741	1.23537	0.00232139
NM_001086140	hnrnpdl.L	0.811034	0.000871004				NM_001086140	hnrnpdl.L	1.25348	0.000997299
NM_001096819	eif2s2.L	0.811358	0.000114338				NM_001096819	eif2s2.L	1.23116	0.00281707
NM_001096138	rpl35.L	0.812669	0.00323835				NM_001096138	rpl35.L	1.24611	0.00663934
NM_001096381	slc35a2.L	0.814104	0.00752432				NM_001096381	slc35a2.L	1.31	0.00107132
NM_001092508	rpl37.S	0.816422	0.00900664				NM_001092508	rpl37.S	1.32521	0.000262533
NM_001089053	utp14a.L	0.819825	0.00349057				NM_001089053	utp14a.L	1.24057	0.00561253
NM_001171762	sf3b5.S	0.820197	0.00421161				NM_001171762	sf3b5.S	1.27616	0.000434399
NM_001094126	crkl.L	1.21895	0.00572814				NM_001094126	crkl.L	0.779024	0.00185442
NM_001086189	atp1b3.L	0.826157	0.00136492				NM_001086189	atp1b3.L	1.20949	0.0097893
NM_001096115	phax.L	1.20963	0.00148627				NM_001096115	phax.L	0.819208	0.00770769
NM_001087118	eif3d.S	0.827647	0.00207582				NM_001087118	eif3d.S	1.28264	0.000198183
NM_001086735	pabpc1.S	0.827787	0.00389712				NM_001086735	pabpc1.S	1.26014	0.0016642
NM_001091242	nucks1.L	0.827975	0.00118907				NM_001091242	nucks1.L	1.25188	0.00142437
NM_001193403	erp44.L	0.842351	0.00770046				NM_001193403	erp44.L	1.21696	0.00933537
NM_001087094	hnrnpk.S	0.868749	0.00652939				NM_001087094	hnrnpk.S	1.20491	0.00367574
