# Supplementary material for: Insulin Receptor-Related Receptor Regulates the Rate of Early Development in Xenopus laevis
Source: Int J Mol Sci. 2022 Aug 17;23(16):9250. doi: 10.3390/ijms23169250 (PMC9409083; doi:10.3390/ijms23169250)
Supplement: Supplementary file 1 [file ijms-23-09250-s001.zip › supplement file S4.xlsx]

## Sheet: Kegg pathways up wt pH7.2-8.5
Category	Term	Count	%	PValue	Genes	List Total	Pop Hits	Pop Total	Fold Enrichment	Bonferroni	Benjamini	FDR
KEGG_PATHWAY	xla04520:Adherens junction	12	2.55863539445629	1.7965030469122028E-4	LOC100505446, MGC81191, MGC131041, MGC79910, LEF1.L, SMAD4.1.L, SNAI2.L, INSR.L, RAC3.S, LEF-1, RAC1.L, FARP2.L	140	81	3700	3.915343915343916	0.015509450861688867	0.015509450861688867	0.19398774507126681
KEGG_PATHWAY	xla04810:Regulation of actin cytoskeleton	17	3.624733475479744	2.6057043337958353E-4	MGC81191, MGC131041, BCAR1.L, ENAH.L, RAC1.L, ROCK2.S, ARHGAP35.L, FGFR3.L, ITGA5.L, ARHGEF12.S, ROCK2.L, SLC9A1.S, FN1.S, ITGB3.L, RAC3.S, PIK3R1.S, ITGB1.S	140	160	3700	2.808035714285714	0.02241749025107742	0.011272277242656337	0.28125430184966493
KEGG_PATHWAY	xla04510:Focal adhesion	15	3.1982942430703627	7.981225884393772E-4	MGC81191, MGC131041, BCAR1.L, RAC1.L, ROCK2.S, ARHGAP35.L, ITGA5.L, ROCK2.L, GSK3B.L, FN1.S, ITGB3.L, RAC3.S, PIK3R1.S, BIRC2.L, ITGB1.S	140	143	3700	2.772227772227772	0.06710664634496577	0.022888781308768036	0.8592101681798914
KEGG_PATHWAY	xla04310:Wnt signaling pathway	13	2.771855010660981	0.0013676748393375703	MGC79910, SMAD4.1.L, TBL1XR1.S, LEF-1, RAC1.L, FZD6.S, ROCK2.S, PLCB3.L, FZD3.L, LEF1.L, GSK3B.L, RAC3.S, FZD10.S	140	118	3700	2.9116222760290555	0.11225359216577158	0.02932860622450295	1.4682532362606304
KEGG_PATHWAY	xla03013:RNA transport	13	2.771855010660981	0.008002036955507944	KPNB1.L, SRRM1.L, NUP160.L, NAT1, TACC3.S, XPO1.S, NUP153.L, NXF1.S, SRRM1.S, PABPC4.L, THOC6.L, UPF1.S, RNPS1.L	140	146	3700	2.353228962818004	0.5029067188811513	0.13046397694522738	8.316762363570096
KEGG_PATHWAY	xla04110:Cell cycle	12	2.55863539445629	0.025134535964545596	CDK4.L, TTK.S, RBL1.L, BUB1.L, RAD21.S, TFDP2.S, MGC79910, CDC27.S, SMAD4.1.L, GSK3B.L, RAD21.L, PLK1.S	140	151	3700	2.100283822138127	0.8908088071582532	0.30865005112200583	24.05159136256203
KEGG_PATHWAY	xla04931:Insulin resistance	8	1.7057569296375266	0.043524097424683855	IRS1.S, MLXIP.L, GSK3B.L, PRKAA1.L, INSR.L, PIK3R1.S, PYGM.L, CPT1A.L	140	87	3700	2.4302134646962235	0.9791723216424587	0.42481727041366324	38.1794519451606
KEGG_PATHWAY	xla03015:mRNA surveillance pathway	8	1.7057569296375266	0.04585778526723318	SRRM1.L, NXF1.S, PABPC4.L, SRRM1.S, PAPOLG.L, UPF1.S, SMG7.L, RNPS1.L	140	88	3700	2.4025974025974026	0.9831600552986994	0.39980471051145383	39.79024758818988
KEGG_PATHWAY	xla04340:Hedgehog signaling pathway	4	0.8528784648187633	0.0652845842286817	PTCH2.S, GLI3.L, GSK3B.L, DHH.L	140	25	3700	4.228571428571429	0.9971873981079449	0.47932396984395886	51.79245631343748
KEGG_PATHWAY	xla04916:Melanogenesis	7	1.4925373134328357	0.09001604399633936	FZD3.L, LEF1.L, GSK3B.L, LEF-1, PLCB3.L, FZD10.S, FZD6.S	140	83	3700	2.2289156626506026	0.999727143080371	0.5598573061362542	63.92109366285257

## Sheet: cellular function GO
Category	Term			Count	%	PValue	Genes	List Total	Pop Hits	Pop Total	Fold Enrichment	Bonferroni	Benjamini	FDR
GOTERM_CC_FAT	GO:0044451	nucleoplasm part		14	2.98507	0.00796565	HIF-1A, NPAT,S, ELL2,S, RNPS1,L, RING1,S, NELFA,L, PSME4,L, EPC2,S, CHD4,L, TAF4,L, MEOX2,L, ZC3H14,S, MAML1,L, MED1	127	162	3300	2.24555	0.862398	0.862398	9.85624
GOTERM_CC_FAT	GO:0005667	transcription factor complex		8	1.70576	0.0174701	RBL1,L, EPAS1,S, TFDP2,S, MGC79910, SMAD4,1,L, POU2F1,S, TAF4,L, ARNT,S	127	71	3300	2.9278	0.98736	0.887572	20.4409
GOTERM_CC_FAT	GO:0005938	cell cortex		5	1.0661	0.0203826	ANLN,L, FNBP1L,S, MGC81191, EPB41,L, MELK,L	127	28	3300	4.64004	0.993946	0.817749	23.447
GOTERM_CC_FAT	GO:0016607	nuclear speck		6	1.27932	0.0205441	HIF-1A, PSME4,L, MEOX2,L, MAML1,L, ZC3H14,S, RNPS1,L	127	42	3300	3.71204	0.994189	0.723902	23.6106
GOTERM_CC_FAT	GO:0005654	nucleoplasm		15	3.19829	0.02186	HIF-1A, NPAT,S, ELL2,S, RNPS1,L, RING1,S, NELFA,L, PSME4,L, EPC2,S, CHD4,L, NOTCH1,S, TAF4,L, MEOX2,L, MAML1,L, ZC3H14,S, MED1	127	204	3300	1.91061	0.995837	0.665889	24.9315
GOTERM_CC_FAT	GO:0099568	cytoplasmic region		5	1.0661	0.0286969	ANLN,L, FNBP1L,S, MGC81191, EPB41,L, MELK,L	127	31	3300	4.19101	0.999269	0.699855	31.4616
GOTERM_CC_FAT	GO:0016604	nuclear body		7	1.49254	0.029419	HIF-1A, NPAT,S, PSME4,L, MEOX2,L, MAML1,L, ZC3H14,S, RNPS1,L	127	62	3300	2.93371	0.999392	0.652821	32.1198
GOTERM_CC_FAT	GO:0009986	cell surface		4	0.852878	0.0385402	FZD3,L, ITGA5,L, ADAM10,S, ITGB1,S	127	20	3300	5.19685	0.999942	0.704291	39.9464
GOTERM_CC_FAT	GO:0030027	lamellipodium		4	0.852878	0.0437439	MGC81191, ACTC1,L, MGC53823, ITGB1,S	127	21	3300	4.94938	0.999985	0.708451	44.0295
GOTERM_CC_FAT	GO:0005694	chromosome		15	3.19829	0.0498575	TOPBP1,L, KMT5C,L, RAD21,S, CDCA5,L, BRD4,L, RAD21,L, SMC2,L, SLX4,L, MTUS1,L, SPDL1,L, CENPC,L, AURKB,L, PLK1,S, ESCO1,L, BRD4,S	127	228	3300	1.70949	0.999997	0.718706	48.4986
GOTERM_CC_FAT	GO:0000922	spindle pole		5	1.0661	0.0594978	TOPBP1,L, RMDN3,L, AURKA,S, SPDL1,L, KIF11,S	127	39	3300	3.33131	1	0.749167	54.8814
GOTERM_CC_FAT	GO:0030054	cell junction		10	2.1322	0.0629272	ARHGAP21,S, LOC100505446, MGC81191, OCLN,S, ITGA5,L, ITSN1,L, EPB41L5,L, ARHGAP21,L, CDH2,L, ITGB1,S	127	132	3300	1.9685	1	0.738995	56.9699
GOTERM_CC_FAT	GO:0008305	integrin complex		3	0.639659	0.0634957	ITGA5,L, ITGB3,L, ITGB1,S	127	11	3300	7.08661	1	0.713916	57.3074
GOTERM_CC_FAT	GO:0098636	protein complex involved in cell adhesion		3	0.639659	0.0634957	ITGA5,L, ITGB3,L, ITGB1,S	127	11	3300	7.08661	1	0.713916	57.3074
GOTERM_CC_FAT	GO:0015630	microtubule cytoskeleton		15	3.19829	0.0687553	TOPBP1,L, RMDN3,L, MTUS1,L, AURKA,S, SPDL1,L, PLK4,L, AURKB,L, MMS19,L, KIF20A,L, PLK1,S, KIF11,S, EML4,S, DNM2,L, KIF18B,L, SHROOM1,L	127	239	3300	1.63081	1	0.716869	60.3159
GOTERM_CC_FAT	GO:0005819	spindle		7	1.49254	0.0717555	TOPBP1,L, RMDN3,L, AURKA,S, SPDL1,L, MMS19,L, PLK1,S, KIF11,S	127	77	3300	2.3622	1	0.708021	61.943
GOTERM_CC_FAT	GO:0098802	plasma membrane receptor complex		3	0.639659	0.0743377	ITGA5,L, ITGB3,L, ITGB1,S	127	12	3300	6.49606	1	0.697994	63.2939
GOTERM_CC_FAT	GO:0031252	cell leading edge		4	0.852878	0.0745907	MGC81191, ACTC1,L, MGC53823, ITGB1,S	127	26	3300	3.99758	1	0.677247	63.4239
GOTERM_CC_FAT	GO:0019898	extrinsic component of membrane		5	1.0661	0.0795829	EPB41L5,L, EPB41,L, PIK3R1,S, FARP2,L, ESYT2,S	127	43	3300	3.02142	1	0.681001	65.9029
GOTERM_CC_FAT	GO:0005887	integral component of plasma membrane		9	1.91898	0.0855566	ITGA5,L, DDR1,L, STOM,L, SCNN1A,L, EPHA4,L, ITGB3,L, INSR,L, ITGB1,S, EPHA4,S	127	120	3300	1.94882	1	0.688832	68.6651
GOTERM_CC_FAT	GO:0016324	apical plasma membrane		3	0.639659	0.0857192	FZD3,L, SCNN1A,L, SHROOM1,L	127	13	3300	5.99637	1	0.670855	68.7374
GOTERM_CC_FAT	GO:0031226	intrinsic component of plasma membrane		9	1.91898	0.0921197	ITGA5,L, DDR1,L, STOM,L, SCNN1A,L, EPHA4,L, ITGB3,L, INSR,L, ITGB1,S, EPHA4,S	127	122	3300	1.91687	1	0.680598	71.4609
GOTERM_CC_FAT	GO:0043235	receptor complex		3	0.639659	0.0975841	ITGA5,L, ITGB3,L, ITGB1,S	127	14	3300	5.56805	1	0.685723	73.611
GOTERM_CC_FAT	GO:0045177	apical part of cell		3	0.639659	0.0975841	FZD3,L, SCNN1A,L, SHROOM1,L	127	14	3300	5.56805	1	0.685723	73.611

## Sheet: biological process GO
Category	Term		Fold Enrichment	Count	%	PValue	Genes	List Total	Pop Hits	Pop Total	Fold Enrichment	Bonferroni	Benjamini	FDR
GOTERM_BP_FAT	GO:0006351	gene expression	1.4082	77	16.4179	1.20147e-07	HIF-1A, RBL1,L, ELL2,S, MGC79910, GLI3,L, NR6A1,S, NCOA3,S, TBL1XR1,S, HNF1B,L, GATA4,L, HOXC6,S, HNF1B,S, MYBL2,S, ERF,S, HOXD3,L, MED23,L, HMBOX1,S, UBTF,S, KMT5C,L, NPAT,S, TSHZ1,L, HAND1,L, CCNT2,S, NR2F2,L, NCOA2,L, GRHL1,L, ZNF238,2,L, KDM3A,L, NCOA2,S, NELFA,L, KDM3A,S, GSK3B,L, SNAI2,L, NOTCH1,S, HMBOX1,L, TAF4,L, CDX1,S, NCOR1,S, MAML1,L, MEOX2,L, MED1, CCNT1,L, ATF6,S, SMAD4,1,L, HOXB7,…	258	931	5556	1.78108	0.000139841	0.000139841	0.000193501
GOTERM_BP_FAT	GO:0097659	nucleobase-containing compound biosynthetic process	1.52032	83	17.6972	1.02029e-06	HIF-1A, RBL1,L, ELL2,S, MGC79910, LIN28A,S, GLI3,L, NR6A1,S, NCOA3,S, TBL1XR1,S, HNF1B,L, GATA4,L, HOXC6,S, HNF1B,S, MYBL2,S, ERF,S, HOXD3,L, MED23,L, HMBOX1,S, UBTF,S, KMT5C,L, NPAT,S, TSHZ1,L, YEATS2,L, HAND1,L, CCNT2,S, NR2F2,L, NCOA2,L, GRHL1,L, ZNF238,2,L, KDM3A,L, NCOA2,S, NELFA,L, KDM3A,S, GSK3B,L, CHD4,L, SNAI2,L, NOTCH1,S, TAF4,L, HMBOX1,L, CDX1,S, NCOR1,S, MAML1,L, MEOX2,L, MED1, CCNT1,…	258	1087	5556	1.64434	0.00118692	0.000593635	0.00164321
GOTERM_BP_FAT	GO:0016070	RNA metabolic process	1.53273	100	21.322	1.14622e-06	LIN28A,S, GLI3,L, NR6A1,S, HNF1B,L, PAPD4A, GATA4,L, HNF1B,S, MYBL2,S, HOXD3,L, PTBP1,S, UBTF,S, HMBOX1,S, YEATS2,L, CCNT2,S, NCOA2,L, KDM3A,L, ZNF238,2,L, NCOA2,S, KDM3A,S, CHD4,L, HMBOX1,L, NCOR1,S, MAML1,L, MEOX2,L, CCNT1,L, ATF6,S, CELF1,S, SMAD4,1,L, POU3F1,L, HOXB7,L, CELF1,L, HIF1A,L, PAX2,L, TFDP2,S, SOX5,S, MEF2D,L, PRDM2,S, MYOD1,S, SOX9,S, BRD4,S, MYT1,S, PRPF8,S, IGF2BP3,L, ASXL1,S, B…	258	1405	5556	1.53273	0.00133331	0.000444633	0.00184601
GOTERM_BP_FAT	GO:0032774	RNA biosynthetic process	1.63981	83	17.6972	1.1485e-06	HIF-1A, RBL1,L, ELL2,S, MGC79910, LIN28A,S, GLI3,L, NR6A1,S, NCOA3,S, TBL1XR1,S, HNF1B,L, GATA4,L, HOXC6,S, HNF1B,S, MYBL2,S, ERF,S, HOXD3,L, MED23,L, HMBOX1,S, UBTF,S, KMT5C,L, NPAT,S, TSHZ1,L, YEATS2,L, HAND1,L, CCNT2,S, NR2F2,L, NCOA2,L, GRHL1,L, ZNF238,2,L, KDM3A,L, NCOA2,S, NELFA,L, KDM3A,S, GSK3B,L, CHD4,L, SNAI2,L, NOTCH1,S, TAF4,L, HMBOX1,L, CDX1,S, NCOR1,S, MAML1,L, MEOX2,L, MED1, CCNT1,…	258	1090	5556	1.63981	0.00133596	0.000334157	0.00184968
GOTERM_BP_FAT	GO:0034654	nucleic acid-templated transcription	1.64434	85	18.1237	1.8586e-05	HIF-1A, RBL1,L, ELL2,S, MGC79910, LIN28A,S, GLI3,L, NR6A1,S, NCOA3,S, TBL1XR1,S, HNF1B,L, GATA4,L, HOXC6,S, LIG3,L, HNF1B,S, MYBL2,S, ERF,S, HOXD3,L, MED23,L, HMBOX1,S, UBTF,S, KMT5C,L, NPAT,S, TSHZ1,L, YEATS2,L, HAND1,L, CCNT2,S, NR2F2,L, NCOA2,L, GRHL1,L, ZNF238,2,L, KDM3A,L, NCOA2,S, NELFA,L, KDM3A,S, GSK3B,L, CHD4,L, SNAI2,L, NOTCH1,S, TAF4,L, HMBOX1,L, CDX1,S, NCOR1,S, MAML1,L, MEOX2,L, MED1…	258	1204	5556	1.52032	0.021402	0.00431752	0.0299293
GOTERM_BP_FAT	GO:0010467	transcription, DNA-templated	1.78108	106	22.6013	2.7501e-05	LIN28A,S, GLI3,L, NR6A1,S, HNF1B,L, GATA4,L, PAPD4A, HNF1B,S, MYBL2,S, HOXD3,L, ACTC1,L, PTBP1,S, UBTF,S, HMBOX1,S, YEATS2,L, CCNT2,S, NCOA2,L, KDM3A,L, ZNF238,2,L, NCOA2,S, KDM3A,S, CHD4,L, HMBOX1,L, NCOR1,S, MAML1,L, MEOX2,L, CCNT1,L, ATF6,S, CELF1,S, SMAD4,1,L, DHH,L, POU3F1,L, HOXB7,L, CELF1,L, HIF1A,L, PAX2,L, TFDP2,S, SOX5,S, MEF2D,L, PRDM2,S, SOX9,S, MYOD1,S, BRD4,S, MYT1,S, PRPF8,S, IGF2B…	258	1621	5556	1.4082	0.0315047	0.00532106	0.0442823
GOTERM_BP_FAT	GO:0010468	regulation of gene expression	1.59687	70	14.9254	3.20454e-05	HIF-1A, RBL1,L, QKI,L, LIN28A,S, GLI3,L, NCOA3,S, NIPBL,S, TBL1XR1,S, HNF1B,L, GATA4,L, HNF1B,S, ERF,S, QKI,S, MED23,L, ACTC1,L, HMBOX1,S, UBTF,S, KMT5C,L, NPAT,S, TSHZ1,L, YEATS2,L, HAND1,L, NCOA2,L, PUM1,S, GRHL1,L, ZNF238,2,L, KDM3A,L, NCOA2,S, NELFA,L, KDM3A,S, CHD4,L, GSK3B,L, SNAI2,L, NOTCH1,S, HMBOX1,L, CDX1,S, NCOR1,S, MAML1,L, ATF6,S, TACC3,S, POU3F1,L, SAP130,S, MLLT1,L, PUM2,L, PAX2,L,…	258	944	5556	1.59687	0.0366143	0.00531461	0.0515979
GOTERM_BP_FAT	GO:0019438	aromatic compound biosynthetic process	1.48456	85	18.1237	4.69904e-05	HIF-1A, RBL1,L, ELL2,S, MGC79910, LIN28A,S, GLI3,L, NR6A1,S, NCOA3,S, TBL1XR1,S, HNF1B,L, GATA4,L, HOXC6,S, LIG3,L, HNF1B,S, MYBL2,S, ERF,S, HOXD3,L, MED23,L, HMBOX1,S, UBTF,S, KMT5C,L, NPAT,S, TSHZ1,L, YEATS2,L, HAND1,L, CCNT2,S, NR2F2,L, NCOA2,L, GRHL1,L, ZNF238,2,L, KDM3A,L, NCOA2,S, NELFA,L, KDM3A,S, GSK3B,L, CHD4,L, SNAI2,L, NOTCH1,S, TAF4,L, HMBOX1,L, CDX1,S, NCOR1,S, MAML1,L, MEOX2,L, MED1…	258	1233	5556	1.48456	0.053229	0.00681394	0.075653
GOTERM_BP_FAT	GO:0018130	heterocycle biosynthetic process	1.47976	85	18.1237	5.31658e-05	HIF-1A, RBL1,L, ELL2,S, MGC79910, LIN28A,S, GLI3,L, NR6A1,S, NCOA3,S, TBL1XR1,S, HNF1B,L, GATA4,L, HOXC6,S, LIG3,L, HNF1B,S, MYBL2,S, ERF,S, HOXD3,L, MED23,L, HMBOX1,S, UBTF,S, KMT5C,L, NPAT,S, TSHZ1,L, YEATS2,L, HAND1,L, CCNT2,S, NR2F2,L, NCOA2,L, GRHL1,L, ZNF238,2,L, KDM3A,L, NCOA2,S, NELFA,L, KDM3A,S, GSK3B,L, CHD4,L, SNAI2,L, NOTCH1,S, TAF4,L, HMBOX1,L, CDX1,S, NCOR1,S, MAML1,L, MEOX2,L, MED1…	258	1237	5556	1.47976	0.0600105	0.0068527	0.0855912
GOTERM_BP_FAT	GO:0010628	positive regulation of gene expression	2.59321	23	4.90405	5.93811e-05	ACTC1,L, HIF-1A, ATF6,S, HMBOX1,S, UBTF,S, MGC53823, BRD4,L, GLI3,L, POU2F1,S, HNF1B,L, MEF2D,S, GATA4,L, PAX2,L, CELF3,L, HNF1B,S, MEF2D,L, HMBOX1,L, SOX9,S, MYOD1,S, FOXI1,L, CDX1,S, MAML1,L, BRD4,S	258	191	5556	2.59321	0.0667868	0.00688833	0.0955927
GOTERM_BP_FAT	GO:0051171	regulation of nitrogen compound metabolic process	1.5605	70	14.9254	6.87479e-05	HIF-1A, RBL1,L, QKI,L, LIN28A,S, GLI3,L, NCOA3,S, TBL1XR1,S, HNF1B,L, GATA4,L, HNF1B,S, ERF,S, QKI,S, MED23,L, HMBOX1,S, UBTF,S, KMT5C,L, NPAT,S, TSHZ1,L, YEATS2,L, HAND1,L, NCOA2,L, PUM1,S, GRHL1,L, ZNF238,2,L, PDS5A,S, KDM3A,L, NCOA2,S, NELFA,L, KDM3A,S, CHD4,L, GSK3B,L, NOTCH1,S, SNAI2,L, HMBOX1,L, CDX1,S, MAML1,L, NCOR1,S, ESCO1,L, TOPBP1,L, ATF6,S, TACC3,S, POU3F1,L, SAP130,S, MLLT1,L, PUM2,…	258	966	5556	1.5605	0.076907	0.00724863	0.110664
GOTERM_BP_FAT	GO:2000112	regulation of cellular macromolecule biosynthetic process	1.56785	68	14.4989	7.98365e-05	HIF-1A, RBL1,L, QKI,L, LIN28A,S, GLI3,L, NCOA3,S, TBL1XR1,S, HNF1B,L, GATA4,L, HNF1B,S, ERF,S, QKI,S, MED23,L, HMBOX1,S, UBTF,S, NPAT,S, KMT5C,L, TSHZ1,L, YEATS2,L, HAND1,L, NCOA2,L, PUM1,S, GRHL1,L, ZNF238,2,L, PDS5A,S, KDM3A,L, NCOA2,S, NELFA,L, KDM3A,S, CHD4,L, GSK3B,L, NOTCH1,S, SNAI2,L, HMBOX1,L, CDX1,S, MAML1,L, NCOR1,S, ESCO1,L, TOPBP1,L, ATF6,S, TACC3,S, POU3F1,L, SAP130,S, MLLT1,L, PUM2,…	258	934	5556	1.56785	0.0887458	0.00771454	0.128502
GOTERM_BP_FAT	GO:0010556	regulation of macromolecule biosynthetic process	1.56617	68	14.4989	8.25889e-05	HIF-1A, RBL1,L, QKI,L, LIN28A,S, GLI3,L, NCOA3,S, TBL1XR1,S, HNF1B,L, GATA4,L, HNF1B,S, ERF,S, QKI,S, MED23,L, HMBOX1,S, UBTF,S, NPAT,S, KMT5C,L, TSHZ1,L, YEATS2,L, HAND1,L, NCOA2,L, PUM1,S, GRHL1,L, ZNF238,2,L, PDS5A,S, KDM3A,L, NCOA2,S, NELFA,L, KDM3A,S, CHD4,L, GSK3B,L, NOTCH1,S, SNAI2,L, HMBOX1,L, CDX1,S, MAML1,L, NCOR1,S, ESCO1,L, TOPBP1,L, ATF6,S, TACC3,S, POU3F1,L, SAP130,S, MLLT1,L, PUM2,…	258	935	5556	1.56617	0.0916609	0.00736791	0.13293
GOTERM_BP_FAT	GO:0019219	regulation of nucleobase-containing compound metabolic process	1.5605	65	13.8593	0.00014382	HIF-1A, RBL1,L, LIN28A,S, GLI3,L, NCOA3,S, TBL1XR1,S, HNF1B,L, GATA4,L, HNF1B,S, ERF,S, MED23,L, HMBOX1,S, UBTF,S, KMT5C,L, NPAT,S, TSHZ1,L, YEATS2,L, HAND1,L, NCOA2,L, GRHL1,L, ZNF238,2,L, PDS5A,S, KDM3A,L, NCOA2,S, NELFA,L, KDM3A,S, CHD4,L, GSK3B,L, NOTCH1,S, SNAI2,L, HMBOX1,L, CDX1,S, MAML1,L, NCOR1,S, ESCO1,L, TOPBP1,L, ATF6,S, POU3F1,L, SAP130,S, MLLT1,L, PAX2,L, RING1,S, MEF2D,L, SOX5,S, PR…	258	897	5556	1.5605	0.154154	0.0118872	0.231376
GOTERM_BP_FAT	GO:0051276	chromosome organization	2.32057	25	5.33049	0.00015351	KMT5C,L, NCAPG2,L, CDCA5,L, BRD4,L, SMC2,L, NIPBL,S, TBL1XR1,S, PDS5B,S, KDM3A,L, BUB1,L, SPDL1,L, CENPC,L, AURKB,L, MBTD1,L, RING1,S, KDM3A,S, EPC2,S, PSME4,L, CHD4,L, PIF1,L, MYOD1,S, ESCO1,L, NCOR1,S, TOP2A,L, BRD4,S	258	232	5556	2.32057	0.163643	0.0118426	0.246948
GOTERM_BP_FAT	GO:0051254	positive regulation of RNA metabolic process	2.54063	21	4.47761	0.0001827	HIF-1A, ATF6,S, HMBOX1,S, UBTF,S, BRD4,L, GLI3,L, POU2F1,S, HNF1B,L, MEF2D,S, GATA4,L, PAX2,L, CELF3,L, HNF1B,S, MEF2D,L, HMBOX1,L, SOX9,S, MYOD1,S, FOXI1,L, CDX1,S, MAML1,L, BRD4,S	258	178	5556	2.54063	0.191587	0.0132047	0.29384
GOTERM_BP_FAT	GO:1902680	positive regulation of RNA biosynthetic process	2.57903	20	4.26439	0.000225207	HIF-1A, ATF6,S, HMBOX1,S, UBTF,S, BRD4,L, GLI3,L, POU2F1,S, HNF1B,L, MEF2D,S, GATA4,L, PAX2,L, HNF1B,S, MEF2D,L, HMBOX1,L, SOX9,S, MYOD1,S, FOXI1,L, CDX1,S, MAML1,L, BRD4,S	258	167	5556	2.57903	0.23062	0.0153035	0.362088
GOTERM_BP_FAT	GO:1903508	positive regulation of nucleic acid-templated transcription	2.57903	20	4.26439	0.000225207	HIF-1A, ATF6,S, HMBOX1,S, UBTF,S, BRD4,L, GLI3,L, POU2F1,S, HNF1B,L, MEF2D,S, GATA4,L, PAX2,L, HNF1B,S, MEF2D,L, HMBOX1,L, SOX9,S, MYOD1,S, FOXI1,L, CDX1,S, MAML1,L, BRD4,S	258	167	5556	2.57903	0.23062	0.0153035	0.362088
GOTERM_BP_FAT	GO:0045893	positive regulation of transcription, DNA-templated	2.57903	20	4.26439	0.000225207	HIF-1A, ATF6,S, HMBOX1,S, UBTF,S, BRD4,L, GLI3,L, POU2F1,S, HNF1B,L, MEF2D,S, GATA4,L, PAX2,L, HNF1B,S, MEF2D,L, HMBOX1,L, SOX9,S, MYOD1,S, FOXI1,L, CDX1,S, MAML1,L, BRD4,S	258	167	5556	2.57903	0.23062	0.0153035	0.362088
GOTERM_BP_FAT	GO:0051252	regulation of RNA metabolic process	1.55613	62	13.2196	0.000239771	HIF-1A, RBL1,L, LIN28A,S, GLI3,L, NCOA3,S, TBL1XR1,S, HNF1B,L, GATA4,L, HNF1B,S, ERF,S, MED23,L, UBTF,S, HMBOX1,S, NPAT,S, KMT5C,L, TSHZ1,L, YEATS2,L, HAND1,L, NCOA2,L, GRHL1,L, ZNF238,2,L, KDM3A,L, NCOA2,S, NELFA,L, KDM3A,S, CHD4,L, GSK3B,L, NOTCH1,S, SNAI2,L, HMBOX1,L, CDX1,S, MAML1,L, NCOR1,S, ATF6,S, POU3F1,L, SAP130,S, MLLT1,L, PAX2,L, RING1,S, MEF2D,L, SOX5,S, PRDM2,S, SOX9,S, MYOD1,S, BRD4…	258	858	5556	1.55613	0.243556	0.0153874	0.385462
GOTERM_BP_FAT	GO:0034502	protein localization to chromosome	13.4593	5	1.0661	0.000270206	TOPBP1,L, SPDL1,L, AURKB,L, RAD21,L, PLK1,S	258	8	5556	13.4593	0.269891	0.0164196	0.43429
GOTERM_BP_FAT	GO:0006355	regulation of transcription, DNA-templated	1.56239	60	12.7932	0.000284781	HIF-1A, RBL1,L, LIN28A,S, GLI3,L, NCOA3,S, TBL1XR1,S, HNF1B,L, GATA4,L, HNF1B,S, ERF,S, MED23,L, UBTF,S, HMBOX1,S, NPAT,S, KMT5C,L, TSHZ1,L, YEATS2,L, HAND1,L, NCOA2,L, GRHL1,L, ZNF238,2,L, KDM3A,L, NCOA2,S, NELFA,L, KDM3A,S, CHD4,L, GSK3B,L, NOTCH1,S, SNAI2,L, HMBOX1,L, CDX1,S, MAML1,L, NCOR1,S, ATF6,S, POU3F1,L, SAP130,S, MLLT1,L, PAX2,L, RING1,S, MEF2D,L, SOX5,S, PRDM2,S, SOX9,S, MYOD1,S, BRD4…	258	827	5556	1.56239	0.282177	0.01644	0.457666
GOTERM_BP_FAT	GO:1903506	regulation of nucleic acid-templated transcription	1.56239	60	12.7932	0.000284781	HIF-1A, RBL1,L, LIN28A,S, GLI3,L, NCOA3,S, TBL1XR1,S, HNF1B,L, GATA4,L, HNF1B,S, ERF,S, MED23,L, UBTF,S, HMBOX1,S, NPAT,S, KMT5C,L, TSHZ1,L, YEATS2,L, HAND1,L, NCOA2,L, GRHL1,L, ZNF238,2,L, KDM3A,L, NCOA2,S, NELFA,L, KDM3A,S, CHD4,L, GSK3B,L, NOTCH1,S, SNAI2,L, HMBOX1,L, CDX1,S, MAML1,L, NCOR1,S, ATF6,S, POU3F1,L, SAP130,S, MLLT1,L, PAX2,L, RING1,S, MEF2D,L, SOX5,S, PRDM2,S, SOX9,S, MYOD1,S, BRD4…	258	827	5556	1.56239	0.282177	0.01644	0.457666
GOTERM_BP_FAT	GO:2001141	regulation of RNA biosynthetic process	1.5605	60	12.7932	0.000294303	HIF-1A, RBL1,L, LIN28A,S, GLI3,L, NCOA3,S, TBL1XR1,S, HNF1B,L, GATA4,L, HNF1B,S, ERF,S, MED23,L, UBTF,S, HMBOX1,S, NPAT,S, KMT5C,L, TSHZ1,L, YEATS2,L, HAND1,L, NCOA2,L, GRHL1,L, ZNF238,2,L, KDM3A,L, NCOA2,S, NELFA,L, KDM3A,S, CHD4,L, GSK3B,L, NOTCH1,S, SNAI2,L, HMBOX1,L, CDX1,S, MAML1,L, NCOR1,S, ATF6,S, POU3F1,L, SAP130,S, MLLT1,L, PAX2,L, RING1,S, MEF2D,L, SOX5,S, PRDM2,S, SOX9,S, MYOD1,S, BRD4…	258	828	5556	1.5605	0.290092	0.0161828	0.472935
GOTERM_BP_FAT	GO:0010604	positive regulation of macromolecule metabolic process	2.13705	26	5.54371	0.000398212	TOPBP1,L, HIF-1A, ATF6,S, GLI3,L, HNF1B,L, GATA4,L, PAX2,L, HNF1B,S, MEF2D,L, MYOD1,S, SOX9,S, BRD4,S, ACTC1,L, HMBOX1,S, UBTF,S, MGC53823, BRD4,L, POU2F1,S, MEF2D,S, CELF3,L, MAP3K10,L, PLK1,S, HMBOX1,L, FOXI1,L, CDX1,S, MAML1,L	258	262	5556	2.13705	0.370992	0.0208528	0.639412
GOTERM_BP_FAT	GO:0034645	cellular macromolecule biosynthetic process	1.35024	98	20.8955	0.000398897	RBL1,L, HIF-1A, ELL2,S, MGC79910, QKI,L, LIN28A,S, GLI3,L, NR6A1,S, NCOA3,S, TBL1XR1,S, HNF1B,L, GATA4,L, HOXC6,S, HNF1B,S, LIG3,L, BLM,S, MYBL2,S, ERF,S, HOXD3,L, QKI,S, MED23,L, HMBOX1,S, UBTF,S, NPAT,S, KMT5C,L, TSHZ1,L, YEATS2,L, HAND1,L, CCNT2,S, NR2F2,L, NCOA2,L, PUM1,S, GRHL1,L, ZNF238,2,L, KDM3A,L, PDS5A,S, NCOA2,S, NELFA,L, KDM3A,S, GSK3B,L, CHD4,L, NOTCH1,S, SNAI2,L, HMBOX1,L, TAF4,L, C…	258	1563	5556	1.35024	0.371493	0.0199892	0.640508
GOTERM_BP_FAT	GO:0045935	positive regulation of nucleobase-containing compound metabolic process	2.3311	21	4.47761	0.00057514	HIF-1A, ATF6,S, HMBOX1,S, UBTF,S, BRD4,L, GLI3,L, POU2F1,S, HNF1B,L, MEF2D,S, GATA4,L, PAX2,L, CELF3,L, HNF1B,S, MEF2D,L, HMBOX1,L, SOX9,S, MYOD1,S, FOXI1,L, CDX1,S, MAML1,L, BRD4,S	258	194	5556	2.3311	0.488115	0.0275166	0.922273
GOTERM_BP_FAT	GO:0010557	positive regulation of macromolecule biosynthetic process	2.35354	20	4.26439	0.000722664	HIF-1A, ATF6,S, HMBOX1,S, UBTF,S, BRD4,L, GLI3,L, POU2F1,S, HNF1B,L, MEF2D,S, GATA4,L, PAX2,L, HNF1B,S, MEF2D,L, HMBOX1,L, SOX9,S, MYOD1,S, FOXI1,L, CDX1,S, MAML1,L, BRD4,S	258	183	5556	2.35354	0.56893	0.0330992	1.15755
GOTERM_BP_FAT	GO:0009893	positive regulation of metabolic process	2.05094	26	5.54371	0.000736493	TOPBP1,L, HIF-1A, ATF6,S, GLI3,L, HNF1B,L, GATA4,L, PAX2,L, HNF1B,S, MEF2D,L, MYOD1,S, SOX9,S, BRD4,S, ACTC1,L, HMBOX1,S, UBTF,S, MGC53823, BRD4,L, POU2F1,S, MEF2D,S, CELF3,L, MAP3K10,L, PLK1,S, HMBOX1,L, FOXI1,L, CDX1,S, MAML1,L	258	273	5556	2.05094	0.575819	0.0324463	1.17958
GOTERM_BP_FAT	GO:0031328	positive regulation of cellular biosynthetic process	2.23159	20	4.26439	0.00137743	HIF-1A, ATF6,S, HMBOX1,S, UBTF,S, BRD4,L, GLI3,L, POU2F1,S, HNF1B,L, MEF2D,S, GATA4,L, PAX2,L, HNF1B,S, MEF2D,L, HMBOX1,L, SOX9,S, MYOD1,S, FOXI1,L, CDX1,S, MAML1,L, BRD4,S	258	193	5556	2.23159	0.798997	0.0576923	2.19547
GOTERM_BP_FAT	GO:0009891	positive regulation of biosynthetic process	2.23159	20	4.26439	0.00137743	HIF-1A, ATF6,S, HMBOX1,S, UBTF,S, BRD4,L, GLI3,L, POU2F1,S, HNF1B,L, MEF2D,S, GATA4,L, PAX2,L, HNF1B,S, MEF2D,L, HMBOX1,L, SOX9,S, MYOD1,S, FOXI1,L, CDX1,S, MAML1,L, BRD4,S	258	193	5556	2.23159	0.798997	0.0576923	2.19547
GOTERM_BP_FAT	GO:0051173	positive regulation of nitrogen compound metabolic process	2.16379	21	4.47761	0.00146881	HIF-1A, ATF6,S, HMBOX1,S, UBTF,S, BRD4,L, GLI3,L, POU2F1,S, HNF1B,L, MEF2D,S, GATA4,L, PAX2,L, CELF3,L, HNF1B,S, MEF2D,L, HMBOX1,L, SOX9,S, MYOD1,S, FOXI1,L, CDX1,S, MAML1,L, BRD4,S	258	209	5556	2.16379	0.819306	0.0592759	2.33951
GOTERM_BP_FAT	GO:0031325	positive regulation of cellular metabolic process	1.95772	24	5.11727	0.00232846	TOPBP1,L, HIF-1A, ATF6,S, HMBOX1,S, UBTF,S, GLI3,L, BRD4,L, POU2F1,S, HNF1B,L, MEF2D,S, GATA4,L, PAX2,L, CELF3,L, HNF1B,S, MAP3K10,L, MEF2D,L, PLK1,S, HMBOX1,L, SOX9,S, MYOD1,S, FOXI1,L, CDX1,S, MAML1,L, BRD4,S	258	264	5556	1.95772	0.933695	0.0893243	3.68484
GOTERM_BP_FAT	GO:0007049	cell cycle	1.69733	32	6.82303	0.00347658	TOPBP1,L, RBL1,L, CDCA5,L, RAD21,L, SMC2,L, NIPBL,S, PDS5B,S, CDK4,L, TTK,S, BUB1,L, TFDP2,S, DBF4B,L, MYBL2,S, KIF20A,L, KIF11,S, ANLN,L, NPAT,S, NCAPG2,L, RBBP8,L, ROCK2,S, PDS5A,S, MTUS1,L, AURKA,S, SPDL1,L, PLK4,L, FOXM1,S, AURKB,L, ROCK2,L, CHD4,L, PLK1,S, MELK,L, ESCO1,L	258	406	5556	1.69733	0.982643	0.126394	5.45452
GOTERM_BP_FAT	GO:0016569	covalent chromatin modification	2.69186	12	2.55864	0.00449038	KDM3A,L, KMT5C,L, AURKB,L, RING1,S, MBTD1,L, KDM3A,S, EPC2,S, BRD4,L, MYOD1,S, TBL1XR1,S, NCOR1,S, BRD4,S	258	96	5556	2.69186	0.994692	0.15548	6.99177
GOTERM_BP_FAT	GO:0006897	endocytosis	3.66551	8	1.70576	0.00536731	FNBP1L,S, GAPVD1,S, LMBR1L,L, ITSN1,L, MGC81482, SH3BP4,S, DNM2,L, ESYT2,S	258	47	5556	3.66551	0.998097	0.177792	8.30253
GOTERM_BP_FAT	GO:0006281	DNA repair	2.20871	16	3.41151	0.00539889	EXO1,S, TOPBP1,L, XRCC1,L, CDCA5,L, RAD21,L, MMS19,L, MCM9,L, RBBP8,L, SLX4,L, FOXM1,S, LIG3,L, BLM,S, WRN,L, PSME4,L, EPC2,S, PIF1,L	258	156	5556	2.20871	0.998166	0.173826	8.34942
GOTERM_BP_FAT	GO:0010825	positive regulation of centrosome duplication	21.5349	3	0.639659	0.00619937	PLK4,L, ROCK2,L, ROCK2,S	258	3	5556	21.5349	0.999282	0.191761	9.53019
GOTERM_BP_FAT	GO:0046607	positive regulation of centrosome cycle	21.5349	3	0.639659	0.00619937	PLK4,L, ROCK2,L, ROCK2,S	258	3	5556	21.5349	0.999282	0.191761	9.53019
GOTERM_BP_FAT	GO:0007229	integrin-mediated signaling pathway	5.66707	5	1.0661	0.00999991	ITGA5,L, ADAM17,L, ITGB3,L, ADAM9,L, ITGB1,S	258	19	5556	5.66707	0.999992	0.28412	14.9442
GOTERM_BP_FAT	GO:0071168	protein localization to chromatin	16.1512	3	0.639659	0.0120207	TOPBP1,L, RAD21,L, PLK1,S	258	4	5556	16.1512	0.999999	0.323636	17.6977
GOTERM_BP_FAT	GO:0006325	chromatin organization	2.13822	14	2.98507	0.0130226	KDM3A,L, KMT5C,L, AURKB,L, RING1,S, MBTD1,L, KDM3A,S, EPC2,S, PSME4,L, BRD4,L, CHD4,L, MYOD1,S, TBL1XR1,S, NCOR1,S, BRD4,S	258	141	5556	2.13822	1	0.337924	19.0317
GOTERM_BP_FAT	GO:0045944	positive regulation of transcription from RNA polymerase II promoter	2.39276	11	2.34542	0.0155749	ATF6,S, PAX2,L, MEF2D,L, BRD4,L, POU2F1,S, MYOD1,S, SOX9,S, CDX1,S, MAML1,L, MEF2D,S, BRD4,S	258	99	5556	2.39276	1	0.381735	22.3388
GOTERM_BP_FAT	GO:0000819	sister chromatid segregation	2.97033	8	1.70576	0.0166944	BUB1,L, SPDL1,L, AURKB,L, CDCA5,L, SMC2,L, NIPBL,S, PDS5B,S, ESCO1,L	258	58	5556	2.97033	1	0.394966	23.749
GOTERM_BP_FAT	GO:0007059	chromosome segregation	2.50406	10	2.1322	0.0171984	TTK,S, BUB1,L, SPDL1,L, AURKB,L, CDCA5,L, RAD21,L, SMC2,L, NIPBL,S, PDS5B,S, ESCO1,L	258	86	5556	2.50406	1	0.39639	24.376
GOTERM_BP_FAT	GO:0006974	cellular response to DNA damage stimulus	1.8774	17	3.62473	0.0178359	EXO1,S, TOPBP1,L, XRCC1,L, CDCA5,L, RAD21,L, MMS19,L, MCM9,L, RBBP8,L, SLX4,L, FOXM1,S, LIG3,L, BLM,S, WRN,L, EPC2,S, PSME4,L, PIF1,L, PLK1,S	258	195	5556	1.8774	1	0.400065	25.1621
GOTERM_BP_FAT	GO:0022402	cell cycle process	1.66768	23	4.90405	0.0185225	ANLN,L, TOPBP1,L, NCAPG2,L, CDCA5,L, RAD21,L, SMC2,L, NIPBL,S, PDS5B,S, ROCK2,S, RBBP8,L, TTK,S, PDS5A,S, AURKA,S, BUB1,L, SPDL1,L, PLK4,L, AURKB,L, ROCK2,L, CHD4,L, PLK1,S, KIF20A,L, KIF11,S, ESCO1,L	258	297	5556	1.66768	1	0.404379	26.0003
GOTERM_BP_FAT	GO:0070830	bicellular tight junction assembly	12.9209	3	0.639659	0.0194259	OCLN,S, MGC131041, MPP5,L	258	5	5556	12.9209	1	0.412001	27.0897
GOTERM_BP_FAT	GO:0043297	apical junction assembly	12.9209	3	0.639659	0.0194259	OCLN,S, MGC131041, MPP5,L	258	5	5556	12.9209	1	0.412001	27.0897
GOTERM_BP_FAT	GO:0033554	cellular response to stress	1.69566	20	4.26439	0.0251517	EXO1,S, TOPBP1,L, XRCC1,L, ATF6,S, CDCA5,L, RAD21,L, MMS19,L, SLC25A24,L, MCM9,L, RBBP8,L, SLX4,L, FOXM1,S, LIG3,L, BLM,S, MAP3K10,L, WRN,L, EPC2,S, PSME4,L, PIF1,L, PLK1,S	258	254	5556	1.69566	1	0.490277	33.6522
GOTERM_BP_FAT	GO:0006468	protein phosphorylation	2.10096	12	2.55864	0.026298	TOPBP1,L, AURKA,S, MAP3K10,L, AURKB,L, MEF2D,L, BRD4,L, ADAM10,S, PLK1,S, INSR,L, MELK,L, MEF2D,S, BRD4,S	258	123	5556	2.10096	1	0.498095	34.8976
GOTERM_BP_FAT	GO:0098813	nuclear chromosome segregation	2.69186	8	1.70576	0.0273277	BUB1,L, SPDL1,L, AURKB,L, CDCA5,L, SMC2,L, NIPBL,S, PDS5B,S, ESCO1,L	258	64	5556	2.69186	1	0.503978	35.9976
GOTERM_BP_FAT	GO:0006366	transcription from RNA polymerase II promoter	1.73048	18	3.83795	0.0294081	ATF6,S, ELL2,S, BRD4,L, POU2F1,S, MEF2D,S, PAX2,L, AURKB,L, RING1,S, MEF2D,L, NELFA,L, ERF,S, PLK1,S, NOTCH1,S, SOX9,S, MYOD1,S, CDX1,S, MAML1,L, BRD4,S	258	224	5556	1.73048	1	0.522525	38.167
GOTERM_BP_FAT	GO:0034329	cell junction assembly	5.74264	4	0.852878	0.0294498	OCLN,S, MGC131041, MPP5,L, ITGB3,L	258	15	5556	5.74264	1	0.515619	38.2097
GOTERM_BP_FAT	GO:0006310	DNA recombination	2.89893	7	1.49254	0.0316197	EXO1,S, LIG3,L, BLM,S, WRN,L, PIF1,L, MCM9,L, RBBP8,L	258	52	5556	2.89893	1	0.533856	40.3975
GOTERM_BP_FAT	GO:0006368	transcription elongation from RNA polymerase II promoter	5.38372	4	0.852878	0.0350373	ELL2,S, NELFA,L, BRD4,L, BRD4,S	258	16	5556	5.38372	1	0.564082	43.6964
GOTERM_BP_FAT	GO:0006357	regulation of transcription from RNA polymerase II promoter	1.63143	20	4.26439	0.0356714	ATF6,S, RBL1,L, BRD4,L, POU2F1,S, POU3F1,L, MEF2D,S, PAX2,L, AURKB,L, RING1,S, MEF2D,L, NELFA,L, EPC2,S, ERF,S, NOTCH1,S, PLK1,S, SOX9,S, MYOD1,S, CDX1,S, MAML1,L, BRD4,S	258	264	5556	1.63143	1	0.563525	44.2894
GOTERM_BP_FAT	GO:0003006	developmental process involved in reproduction	3.23023	6	1.27932	0.0356988	PAPD4A, LOC100505446, HNF1B,S, PSME4,L, PLK1,S, SOX9,S	258	40	5556	3.23023	1	0.556792	44.3148
GOTERM_BP_FAT	GO:0000070	mitotic sister chromatid segregation	2.79156	7	1.49254	0.0371831	BUB1,L, SPDL1,L, AURKB,L, CDCA5,L, SMC2,L, NIPBL,S, PDS5B,S	258	54	5556	2.79156	1	0.564906	45.6793
GOTERM_BP_FAT	GO:0051297	centrosome organization	3.84551	5	1.0661	0.0381995	AURKA,S, PLK4,L, ROCK2,L, PLK1,S, ROCK2,S	258	28	5556	3.84551	1	0.568096	46.5956
GOTERM_BP_FAT	GO:0015931	nucleobase-containing compound transport	3.15145	6	1.27932	0.0391805	QKI,L, IGF2BP3,L, NUP153,L, NXF1,S, SLC25A24,L, QKI,S	258	41	5556	3.15145	1	0.570822	47.4661
GOTERM_BP_FAT	GO:0006354	DNA-templated transcription, elongation	5.06703	4	0.852878	0.0411302	ELL2,S, NELFA,L, BRD4,L, BRD4,S	258	17	5556	5.06703	1	0.582304	49.157
GOTERM_BP_FAT	GO:0034330	cell junction organization	5.06703	4	0.852878	0.0411302	OCLN,S, MGC131041, MPP5,L, ITGB3,L	258	17	5556	5.06703	1	0.582304	49.157
GOTERM_BP_FAT	GO:0022412	cellular process involved in reproduction in multicellular organism	3.71291	5	1.0661	0.0427578	PAPD4A, LOC100505446, PSME4,L, PLK1,S, SPAM1,L	258	29	5556	3.71291	1	0.590319	50.5292
GOTERM_BP_FAT	GO:0007067	mitotic nuclear division	1.73668	15	3.19829	0.048334	ANLN,L, PDS5A,S, BUB1,L, AURKA,S, SPDL1,L, NCAPG2,L, AURKB,L, CDCA5,L, RAD21,L, SMC2,L, PLK1,S, NIPBL,S, PDS5B,S, KIF11,S, RBBP8,L	258	186	5556	1.73668	1	0.629995	54.9718
GOTERM_BP_FAT	GO:0000278	mitotic cell cycle	1.65653	17	3.62473	0.0489777	ANLN,L, NCAPG2,L, CDCA5,L, RAD21,L, SMC2,L, NIPBL,S, PDS5B,S, RBBP8,L, TTK,S, PDS5A,S, AURKA,S, BUB1,L, SPDL1,L, TFDP2,S, AURKB,L, PLK1,S, KIF11,S	258	221	5556	1.65653	1	0.628697	55.4598
GOTERM_BP_FAT	GO:0051301	cell division	1.65653	17	3.62473	0.0489777	ANLN,L, LOC100462920, NCAPG2,L, CDCA5,L, RAD21,L, SMC2,L, PDS5B,S, MDK,S, RBBP8,L, CDK4,L, PDS5A,S, AURKA,S, SPDL1,L, AURKB,L, PLK1,S, KIF20A,L, KIF11,S	258	221	5556	1.65653	1	0.628697	55.4598
GOTERM_BP_FAT	GO:0007043	cell-cell junction assembly	8.07558	3	0.639659	0.0496217	OCLN,S, MGC131041, MPP5,L	258	8	5556	8.07558	1	0.627443	55.943
GOTERM_BP_FAT	GO:0010824	regulation of centrosome duplication	8.07558	3	0.639659	0.0496217	PLK4,L, ROCK2,L, ROCK2,S	258	8	5556	8.07558	1	0.627443	55.943
GOTERM_BP_FAT	GO:0044702	single organism reproductive process	2.20243	9	1.91898	0.0497042	PAPD4A, LOC100505446, AURKA,S, HNF1B,S, PSME4,L, PLK1,S, SOX9,S, SPAM1,L, RBBP8,L	258	88	5556	2.20243	1	0.621991	56.0046
GOTERM_BP_FAT	GO:0007155	cell adhesion	1.97403	11	2.34542	0.0501674	LOC100505446, ELMO1,S, PCDH8L,S, ITGA5,L, EPHA4,L, FN1,S, ADAM10,S, ITGB3,L, CDH2,L, ITGB1,S, EPHA4,S	258	120	5556	1.97403	1	0.619511	56.3487
GOTERM_BP_FAT	GO:0022610	biological adhesion	1.97403	11	2.34542	0.0501674	LOC100505446, ELMO1,S, PCDH8L,S, ITGA5,L, EPHA4,L, FN1,S, ADAM10,S, ITGB3,L, CDH2,L, ITGB1,S, EPHA4,S	258	120	5556	1.97403	1	0.619511	56.3487
GOTERM_BP_FAT	GO:0090068	positive regulation of cell cycle process	4.53366	4	0.852878	0.0547913	PLK4,L, AURKB,L, ROCK2,L, ROCK2,S	258	19	5556	4.53366	1	0.646942	59.6481
GOTERM_BP_FAT	GO:0006259	DNA metabolic process	1.55575	19	4.05117	0.060274	EXO1,S, TOPBP1,L, XRCC1,L, CDCA5,L, RAD21,L, MMS19,L, MCM9,L, RBBP8,L, SLX4,L, PDS5A,S, FOXM1,S, LIG3,L, BLM,S, WRN,L, EPC2,S, PSME4,L, PIF1,L, ESCO1,L, TOP2A,L	258	263	5556	1.55575	1	0.67718	63.257
GOTERM_BP_FAT	GO:0046605	regulation of centrosome cycle	7.17829	3	0.639659	0.0618919	PLK4,L, ROCK2,L, ROCK2,S	258	9	5556	7.17829	1	0.681497	64.2627
GOTERM_BP_FAT	GO:0007219	Notch signaling pathway	4.30698	4	0.852878	0.062333	ADAM10,S, NOTCH1,S, POU2F1,S, MAML1,L	258	20	5556	4.30698	1	0.678605	64.5324
GOTERM_BP_FAT	GO:0007098	centrosome cycle	4.30698	4	0.852878	0.062333	AURKA,S, PLK4,L, ROCK2,L, ROCK2,S	258	20	5556	4.30698	1	0.678605	64.5324
GOTERM_BP_FAT	GO:0031023	microtubule organizing center organization	3.26286	5	1.0661	0.0639086	AURKA,S, PLK4,L, ROCK2,L, PLK1,S, ROCK2,S	258	33	5556	3.26286	1	0.682526	65.4802
GOTERM_BP_FAT	GO:0033365	protein localization to organelle	2.20871	8	1.70576	0.0678415	TOPBP1,L, KPNA2,S, SPDL1,L, AURKB,L, KPNA2,L, SH3BP4,S, RAD21,L, PLK1,S	258	78	5556	2.20871	1	0.699574	67.7432
GOTERM_BP_FAT	GO:1903047	mitotic cell cycle process	1.61008	16	3.41151	0.0695143	ANLN,L, NCAPG2,L, CDCA5,L, RAD21,L, SMC2,L, NIPBL,S, PDS5B,S, RBBP8,L, TTK,S, PDS5A,S, AURKA,S, BUB1,L, SPDL1,L, AURKB,L, PLK1,S, KIF11,S	258	214	5556	1.61008	1	0.703417	68.663
GOTERM_BP_FAT	GO:0007062	sister chromatid cohesion	4.10188	4	0.852878	0.0703283	CDCA5,L, NIPBL,S, PDS5B,S, ESCO1,L	258	21	5556	4.10188	1	0.702582	69.1016
GOTERM_BP_FAT	GO:0018105	peptidyl-serine phosphorylation	6.46047	3	0.639659	0.0750614	TOPBP1,L, AURKA,S, AURKB,L	258	10	5556	6.46047	1	0.721745	71.54
GOTERM_BP_FAT	GO:0000280	nuclear division	1.62323	15	3.19829	0.0759739	ANLN,L, PDS5A,S, BUB1,L, AURKA,S, SPDL1,L, NCAPG2,L, AURKB,L, CDCA5,L, RAD21,L, SMC2,L, PLK1,S, NIPBL,S, PDS5B,S, KIF11,S, RBBP8,L	258	199	5556	1.62323	1	0.721241	71.9889
GOTERM_BP_FAT	GO:0022414	reproductive process	1.99808	9	1.91898	0.0788352	PAPD4A, LOC100505446, AURKA,S, HNF1B,S, PSME4,L, PLK1,S, SOX9,S, SPAM1,L, RBBP8,L	258	97	5556	1.99808	1	0.730008	73.3536
GOTERM_BP_FAT	GO:0000003	reproduction	1.99808	9	1.91898	0.0788352	PAPD4A, LOC100505446, AURKA,S, HNF1B,S, PSME4,L, PLK1,S, SOX9,S, SPAM1,L, RBBP8,L	258	97	5556	1.99808	1	0.730008	73.3536
GOTERM_BP_FAT	GO:0034243	regulation of transcription elongation from RNA polymerase II promoter	5.87315	3	0.639659	0.0890213	NELFA,L, BRD4,L, BRD4,S	258	11	5556	5.87315	1	0.769285	77.7227
GOTERM_BP_FAT	GO:0001708	cell fate specification	5.87315	3	0.639659	0.0890213	FZD3,L, SNAI2,L, FOXI1,L	258	11	5556	5.87315	1	0.769285	77.7227
GOTERM_BP_FAT	GO:0051028	mRNA transport	2.91012	5	1.0661	0.0895853	QKI,L, IGF2BP3,L, NUP153,L, NXF1,S, QKI,S	258	37	5556	2.91012	1	0.76698	77.9437
GOTERM_BP_FAT	GO:1901407	regulation of phosphorylation of RNA polymerase II C-terminal domain	21.5349	2	0.426439	0.0903809	BRD4,L, BRD4,S	258	2	5556	21.5349	1	0.76563	78.2521
GOTERM_BP_FAT	GO:0007166	cell surface receptor signaling pathway	1.43112	21	4.47761	0.0927845	MGC79910, ADAM17,L, SMAD4,1,L, GLI3,L, POU2F1,S, VANGL2,S, INSR,L, ADAM9,L, LEF-1, IRS1,S, MST1R,L, ITGA5,L, SOX5,S, LEF1,L, GSK3B,L, NOTCH1,S, ADAM10,S, ITGB3,L, P2RY11,L, MAML1,L, ITGB1,S	258	316	5556	1.43112	1	0.770536	79.1594
GOTERM_BP_FAT	GO:0051236	establishment of RNA localization	2.83354	5	1.0661	0.0966745	QKI,L, IGF2BP3,L, NUP153,L, NXF1,S, QKI,S	258	38	5556	2.83354	1	0.780689	80.5529
GOTERM_BP_FAT	GO:0050657	nucleic acid transport	2.83354	5	1.0661	0.0966745	QKI,L, IGF2BP3,L, NUP153,L, NXF1,S, QKI,S	258	38	5556	2.83354	1	0.780689	80.5529
GOTERM_BP_FAT	GO:0050658	RNA transport	2.83354	5	1.0661	0.0966745	QKI,L, IGF2BP3,L, NUP153,L, NXF1,S, QKI,S	258	38	5556	2.83354	1	0.780689	80.5529
GOTERM_BP_FAT	GO:0007281	germ cell development	3.58915	4	0.852878	0.096855	PAPD4A, LOC100505446, PSME4,L, PLK1,S	258	24	5556	3.58915	1	0.777094	80.6154
GOTERM_BP_FAT	GO:0045787	positive regulation of cell cycle	3.58915	4	0.852878	0.096855	PLK4,L, AURKB,L, ROCK2,L, ROCK2,S	258	24	5556	3.58915	1	0.777094	80.6154
