# Supplementary material for: Insulin Receptor-Related Receptor Regulates the Rate of Early Development in Xenopus laevis
Source: Int J Mol Sci. 2022 Aug 17;23(16):9250. doi: 10.3390/ijms23169250 (PMC9409083; doi:10.3390/ijms23169250)
Supplement: Supplementary file 1 [file ijms-23-09250-s001.zip › supplement file S5.xlsx]

## Sheet: Kegg pathway down wt pH 7.2-8.5
Kegg	Term	Count	%	PValue	Genes	List Total	Pop Hits	Pop Total	Fold Enrichment	Bonferroni	Benjamini	FDR
KEGG_PATHWAY	xla03040:Spliceosome	21	6.3444108761329305	2.231475399412049E-8	PPIH.L, LSM7.L, SRSF9.L, TXNL4A.S, SNRPB.L, SNRPN, SNRPF.S, HNRNPA1.S, SNRNP27.S, SRSF7.L, RBMX.S, RBM8A.L, LOC397772, HNRNPA1, LSM5.L, SNRPB2.L, HNRNPA3.S, SNRPA1.S, LSM6.S, ALYREF.L, MAGOH.L	143	123	3700	4.417533685826369	2.164528823844769E-6	2.164528823844769E-6	2.462578402306903E-5
KEGG_PATHWAY	xla01130:Biosynthesis of antibiotics	17	5.13595166163142	0.007122518249560847	ALDH3A2.S, MGC81403, CTH.L, ARG2.S, SDS.L, TPI1.S, LDHB.S, PAICS.1.S, CBS.L, ADSL.L, UAP1.S, GCDH.L, SDHA.L, PDHA1.L, ACAT2.S, SDHA.S, IDI1.L	143	214	3700	2.055421214299719	0.500104615673924	0.2929671971357509	7.58518570436173
KEGG_PATHWAY	xla00620:Pyruvate metabolism	6	1.812688821752266	0.023101681528128155	MGC81403, ALDH3A2.S, ME2.S, LDHB.S, PDHA1.L, ACAT2.S	143	43	3700	3.6103431452268664	0.8963932336075158	0.5303265186344266	22.73530606914822
KEGG_PATHWAY	xla05168:Herpes simplex infection	10	3.0211480362537766	0.04902447021087406	SOCS3.L, FOS.S, SRSF9.L, MYD88.L, JUN.L, TAF13.S, SRSF7.L, ALYREF.L, SOCS3.S, CYCS.S	143	125	3700	2.06993006993007	0.9923717280209418	0.704466619024183	42.57718916887473
KEGG_PATHWAY	xla00270:Cysteine and methionine metabolism	5	1.5105740181268883	0.05152127817406917	CTH.L, SDS.L, MPST.L, LDHB.S, CBS.L	143	37	3700	3.4965034965034967	0.9940887890242789	0.6416269919739891	44.21923117161809
KEGG_PATHWAY	xla00071:Fatty acid degradation	5	1.5105740181268883	0.05593202012642458	MGC81403, ALDH3A2.S, GCDH.L, ECI1.L, ACAT2.S	143	38	3700	3.4044902465955102	0.996238881816614	0.6056460789429783	47.01599853024745
KEGG_PATHWAY	xla03410:Base excision repair	4	1.2084592145015105	0.06872274452450944	POLE4.L, HMGB1.L, HMG-1, MGC53867	143	25	3700	4.13986013986014	0.9989984730393198	0.6271593684296334	54.42081519765727
KEGG_PATHWAY	xla03010:Ribosome	10	3.0211480362537766	0.09003582971358584	RPS3.S, RPS28P9.S, RPS23.L, RPL22L1.L, MRPL11.L, RPL10A.S, MGC80163, MRPL3.S, RPS3.L, MGC82136	143	141	3700	1.8350443882358778	0.9998939876747988	0.6814559150909183	64.69742892860285

## Sheet: Cellular function GO
Category	Term	Count	%	PValue	Genes	List Total	Pop Hits	Pop Total	Fold Enrichment	Bonferroni	Benjamini	FDR
GOTERM_CC_FAT	GO:0030529~intracellular ribonucleoprotein complex	25	7.552870090634441	7.648949949966557E-5	LSM7.L, RPS28P9.S, SNRPB.L, TXNL4A.S, RPS23.L, RPL22L1.L, LOC397772, MRPL3.S, SRP9.L, PABPN1.S, PABPN1.L, HNRNPA3.S, RPS3.L, RPS3.S, YBX1.S, SNRPN, SNRPF.S, RPL10A.S, RBMX.S, MGC80163, HNRNPA1, CIRBP.L, MRPL11.L, LSM6.S, MGC82136	113	311	3300	2.3475514327177534	0.013447917048549418	0.013447917048549418	0.09391079146426895
GOTERM_CC_FAT	GO:1990904~ribonucleoprotein complex	25	7.552870090634441	7.648949949966557E-5	LSM7.L, RPS28P9.S, SNRPB.L, TXNL4A.S, RPS23.L, RPL22L1.L, LOC397772, MRPL3.S, SRP9.L, PABPN1.S, PABPN1.L, HNRNPA3.S, RPS3.L, RPS3.S, YBX1.S, SNRPN, SNRPF.S, RPL10A.S, RBMX.S, MGC80163, HNRNPA1, CIRBP.L, MRPL11.L, LSM6.S, MGC82136	113	311	3300	2.3475514327177534	0.013447917048549418	0.013447917048549418	0.09391079146426895
GOTERM_CC_FAT	GO:0000786~nucleosome	7	2.1148036253776437	0.0013151207552682216	H3F3C.L, H2AFZ.L, HIST1H2AM.L, H3F3B, H3F3A.L, HIST2H3D.L, H3F3B.L	113	37	3300	5.524994020569242	0.20779063514225482	0.10993856118931589	1.6034195344575286
GOTERM_CC_FAT	GO:0044815~DNA packaging complex	7	2.1148036253776437	0.0025849533679321024	H3F3C.L, H2AFZ.L, HIST1H2AM.L, H3F3B, H3F3A.L, HIST2H3D.L, H3F3B.L	113	42	3300	4.867256637168142	0.3675341947985997	0.1416211334813654	3.1291795861176475
GOTERM_CC_FAT	GO:0005743~mitochondrial inner membrane	11	3.3232628398791544	0.005045150031867307	SLC25A26.L, UQCRFS1.L, RPS3.S, UQCC3.L, MPC1.L, SDHA.L, UQCRFS1.S, MPC1.S, TIMM22.S, RPS3.L, SDHA.S	113	115	3300	2.7933820700269334	0.591495275478005	0.20053533959321268	6.023547988890854
GOTERM_CC_FAT	GO:0032993~protein-DNA complex	7	2.1148036253776437	0.005683260646210449	H3F3C.L, H2AFZ.L, HIST1H2AM.L, H3F3B, H3F3A.L, HIST2H3D.L, H3F3B.L	113	49	3300	4.171934260429835	0.6353460701721659	0.18271001028205847	6.761183806429594
GOTERM_CC_FAT	GO:0044429~mitochondrial part	16	4.833836858006042	0.01027039901118932	RPS3.S, MPC1.L, LYRM7.L, GRPEL1.L, SLC25A26.L, UQCRFS1.L, UQCC3.L, UQCRFS1.S, SDHA.L, MPC1.S, TIMM22.S, TOMM22.L, RPS3.L, CYCS.S, VDAC3.L, SDHA.S	113	231	3300	2.02275600505689	0.8391463148403511	0.2625399431984691	11.909246005402963
GOTERM_CC_FAT	GO:0005740~mitochondrial envelope	14	4.229607250755287	0.012029670184834872	RPS3.S, MPC1.L, UQCRFS1.L, SLC25A26.L, UQCC3.L, UQCRFS1.S, SDHA.L, MPC1.S, TIMM22.S, TOMM22.L, RPS3.L, CYCS.S, VDAC3.L, SDHA.S	113	192	3300	2.129424778761062	0.8825992949285253	0.26363046092671827	13.81337912208106
GOTERM_CC_FAT	GO:0019866~organelle inner membrane	11	3.3232628398791544	0.013027384742284806	SLC25A26.L, UQCRFS1.L, RPS3.S, UQCC3.L, MPC1.L, SDHA.L, UQCRFS1.S, MPC1.S, TIMM22.S, RPS3.L, SDHA.S	113	132	3300	2.433628318584071	0.9018244827488118	0.2518298108105608	14.876372694849838
GOTERM_CC_FAT	GO:0031966~mitochondrial membrane	13	3.927492447129909	0.013699042396273979	RPS3.S, MPC1.L, UQCRFS1.L, SLC25A26.L, UQCC3.L, UQCRFS1.S, SDHA.L, TIMM22.S, MPC1.S, TOMM22.L, RPS3.L, VDAC3.L, SDHA.S	113	174	3300	2.181873664937443	0.9129690956337478	0.2375946344661083	15.5851787771215
GOTERM_CC_FAT	GO:0005732~small nucleolar ribonucleoprotein complex	3	0.906344410876133	0.015661322872455058	LSM7.L, SNRPF.S, LSM6.S	113	6	3300	14.601769911504425	0.9388233991888784	0.2437619339763446	17.625050444616797
GOTERM_CC_FAT	GO:0031975~envelope	16	4.833836858006042	0.02526804700462512	RAN.S, RPS3.S, MPC1.L, LRRC59.S, UQCRFS1.L, SLC25A26.L, UQCC3.L, UQCRFS1.S, SDHA.L, MPC1.S, TIMM22.S, TOMM22.L, RPS3.L, CYCS.S, VDAC3.L, SDHA.S	113	257	3300	1.818119210770979	0.9892184565244936	0.3375504451576019	26.9739163706601
GOTERM_CC_FAT	GO:0031967~organelle envelope	16	4.833836858006042	0.02526804700462512	RAN.S, RPS3.S, MPC1.L, LRRC59.S, UQCRFS1.L, SLC25A26.L, UQCC3.L, UQCRFS1.S, SDHA.L, MPC1.S, TIMM22.S, TOMM22.L, RPS3.L, CYCS.S, VDAC3.L, SDHA.S	113	257	3300	1.818119210770979	0.9892184565244936	0.3375504451576019	26.9739163706601
GOTERM_CC_FAT	GO:0000785~chromatin	8	2.416918429003021	0.03329486767255543	H3F3C.L, H2AFZ.L, HIST1H2AM.L, H3F3B, RBMX.S, H3F3A.L, HIST2H3D.L, H3F3B.L	113	91	3300	2.567344160264514	0.9975051622740541	0.39314231148735357	34.026746102612414
GOTERM_CC_FAT	GO:0015935~small ribosomal subunit	4	1.2084592145015105	0.050877540983201304	RPS3.S, RPS23.L, RPS3.L, MGC82136	113	25	3300	4.672566371681416	0.9999031636781951	0.5088278721969268	47.343575713576904
GOTERM_CC_FAT	GO:0044391~ribosomal subunit	5	1.5105740181268883	0.05231278457325012	RPS3.S, RPS23.L, RPL10A.S, RPS3.L, MGC82136	113	42	3300	3.4766118836915294	0.9999259186517883	0.4930335663779649	48.3133134474656
GOTERM_CC_FAT	GO:0043296~apical junction complex	4	1.2084592145015105	0.06739593478880482	CLDN6.1.L, CLDN4L2, CLA, CLDN7.L	113	28	3300	4.171934260429835	0.9999956706485285	0.56103672269286	57.558093844100625
GOTERM_CC_FAT	GO:0070160~occluding junction	4	1.2084592145015105	0.06739593478880482	CLDN6.1.L, CLDN4L2, CLA, CLDN7.L	113	28	3300	4.171934260429835	0.9999956706485285	0.56103672269286	57.558093844100625
GOTERM_CC_FAT	GO:0005923~bicellular tight junction	4	1.2084592145015105	0.06739593478880482	CLDN6.1.L, CLDN4L2, CLA, CLDN7.L	113	28	3300	4.171934260429835	0.9999956706485285	0.56103672269286	57.558093844100625
GOTERM_CC_FAT	GO:0005681~spliceosomal complex	4	1.2084592145015105	0.07338267822543496	TXNL4A.S, SNRPF.S, RBMX.S, LSM6.S	113	29	3300	4.028074458346048	0.9999986152436734	0.5696360996067206	60.78601747920969
GOTERM_CC_FAT	GO:0005840~ribosome	10	3.0211480362537766	0.08820999713047711	RPS3.S, RPS28P9.S, RPS23.L, RPL22L1.L, MRPL11.L, RPL10A.S, MGC80163, MRPL3.S, RPS3.L, MGC82136	113	159	3300	1.8367006177992988	0.9999999203135957	0.6176735304514538	67.83437615909514

## Sheet: Biological process GO
Category	Term		Fold Enrichment	Count	%	PValue	Genes	List Total	Pop Hits	Pop Total	Fold Enrichment	Bonferroni	Benjamini	FDR
GOTERM_BP_FAT	GO:0048264	determination of dorsal/ventral asymmetry	17.5453	6	1.81269	2.52408e-07	VENTX3,2,S, FOXI4,2,L, VENTX1,2,S, VENTX1,1,S, FOXI4,2,S, VENTX1,1,L	190	6	5556	29.2421	0.000271806	0.000271806	0.000402566
GOTERM_BP_FAT	GO:0048262	determination of ventral identity	29.2421	6	1.81269	9.47923e-06	VENTX3,2,S, FOXI4,2,L, VENTX1,2,S, VENTX1,1,S, FOXI4,2,S, VENTX1,1,L	190	10	5556	17.5453	0.0101572	0.00509158	0.0151174
GOTERM_BP_FAT	GO:0071772	response to BMP	8.89977	7	2.1148	8.90825e-05	VENTX3,2,S, VENTX1,2,S, VENTX1,1,S, POU5F3,2,L, FOXF1,L, NOG,L, VENTX1,1,L	190	23	5556	8.89977	0.091487	0.031476	0.141984
GOTERM_BP_FAT	GO:0030509	BMP signaling pathway	8.89977	7	2.1148	8.90825e-05	VENTX3,2,S, VENTX1,2,S, VENTX1,1,S, POU5F3,2,L, FOXF1,L, NOG,L, VENTX1,1,L	190	23	5556	8.89977	0.091487	0.031476	0.141984
GOTERM_BP_FAT	GO:0071773	cellular response to BMP stimulus	8.89977	7	2.1148	8.90825e-05	VENTX3,2,S, VENTX1,2,S, VENTX1,1,S, POU5F3,2,L, FOXF1,L, NOG,L, VENTX1,1,L	190	23	5556	8.89977	0.091487	0.031476	0.141984
GOTERM_BP_FAT	GO:0009790	embryo development	2.84518	18	5.43807	0.00016103	MGC83242, WNT11B,L, VENTX1,2,S, VENTX1,1,S, FOXF1,L, SDC4,S, WNT11,L, VEGT,L, SDC4,L, CIRBP,L, CIRBP,S, ID3,L, POU5F3,2,L, ID3,S, WNT8A,L, HES7,1,L, HES4,S, VENTX1,1,L	190	185	5556	2.84518	0.159235	0.0424342	0.256519
GOTERM_BP_FAT	GO:0007369	gastrulation	4.3468	11	3.32326	0.000176606	CIRBP,L, VENTX1,2,S, CIRBP,S, WNT11B,L, VENTX1,1,S, POU5F3,2,L, SDC4,S, VEGT,L, WNT11,L, SDC4,L, VENTX1,1,L	190	74	5556	4.3468	0.173224	0.0373296	0.281298
GOTERM_BP_FAT	GO:0016071	mRNA metabolic process	2.81475	18	5.43807	0.000183584	LSM7,L, RNMT,L, YBX1,S, TXNL4A,S, SNRPF,S, SPDYC,S, SNRNP27,S, RBMX,S, RBM8A,L, FRG1,L, CIRBP,L, PABPN1,S, PABPN1,L, CIRBP,S, SNRPB2,L, LSM6,S, ALYREF,L, MAGOH,L	190	187	5556	2.81475	0.179415	0.0324192	0.292398
GOTERM_BP_FAT	GO:0006397	mRNA processing	2.90605	16	4.83384	0.000340049	LSM7,L, RNMT,L, YBX1,S, TXNL4A,S, SNRPF,S, SPDYC,S, SNRNP27,S, RBMX,S, RBM8A,L, FRG1,L, PABPN1,S, PABPN1,L, SNRPB2,L, LSM6,S, ALYREF,L, MAGOH,L	190	161	5556	2.90605	0.306702	0.0509823	0.54097
GOTERM_BP_FAT	GO:0045934	negative regulation of nucleobase-containing compound metabolic process	2.85289	16	4.83384	0.000415277	FOXD4L1,2,L, WNT11B,L, VENTX1,2,S, VENTX1,1,S, RBMX,S, VENTX3,2,S, CIRBP,L, POU5F3,3,L, CIRBP,S, GMNN,S, ID3,L, POU5F3,2,L, ID3,S, HES7,1,L, HES4,S, VENTX1,1,L	190	164	5556	2.85289	0.360678	0.0543836	0.660276
GOTERM_BP_FAT	GO:0009799	specification of symmetry	8.35489	6	1.81269	0.000563674	VENTX3,2,S, FOXI4,2,L, VENTX1,2,S, VENTX1,1,S, FOXI4,2,S, VENTX1,1,L	190	21	5556	8.35489	0.455152	0.0652461	0.895229
GOTERM_BP_FAT	GO:0009855	determination of bilateral symmetry	8.35489	6	1.81269	0.000563674	VENTX3,2,S, FOXI4,2,L, VENTX1,2,S, VENTX1,1,S, FOXI4,2,S, VENTX1,1,L	190	21	5556	8.35489	0.455152	0.0652461	0.895229
GOTERM_BP_FAT	GO:0009953	dorsal/ventral pattern formation	6.39671	7	2.1148	0.000619477	VENTX3,2,S, FOXI4,2,L, VENTX1,2,S, WNT11B,L, VENTX1,1,S, FOXI4,2,S, VENTX1,1,L	190	32	5556	6.39671	0.486951	0.06456	0.983446
GOTERM_BP_FAT	GO:0051253	negative regulation of RNA metabolic process	2.82988	15	4.53172	0.00073422	FOXD4L1,2,L, WNT11B,L, VENTX1,2,S, VENTX1,1,S, RBMX,S, VENTX3,2,S, CIRBP,L, POU5F3,3,L, CIRBP,S, ID3,L, POU5F3,2,L, ID3,S, HES7,1,L, HES4,S, VENTX1,1,L	190	155	5556	2.82988	0.546629	0.0693884	1.16461
GOTERM_BP_FAT	GO:0051172	negative regulation of nitrogen compound metabolic process	2.58914	17	5.13595	0.000752817	FOXD4L1,2,L, WNT11B,L, VENTX1,2,S, VENTX1,1,S, RBMX,S, SRP9,L, VENTX3,2,S, CIRBP,L, CIRBP,S, POU5F3,3,L, GMNN,S, ID3,L, POU5F3,2,L, ID3,S, HES7,1,L, HES4,S, VENTX1,1,L	190	192	5556	2.58914	0.555626	0.0653572	1.19394
GOTERM_BP_FAT	GO:0010467	gene expression	1.37101	76	22.9607	0.00105264	MSX1,S, RPS28P9,S, RPS23,L, SNRPD3,S, VENTX1,1,S, SNRNP27,S, MRPL3,S, DLX5,L, PABPN1,S, SUPT4H1,L, PABPN1,L, ID3,L, ATF3,L, SNRPB2,L, TAF13,S, ID3,S, VENTX1,1,L, ETS2,S, YBX1,S, FOS,S, JUND,S, VENTX1,2,S, SNRPF,S, RBMX,S, RPL10A,S, THAP1,L, VEGT,L, RBM8A,L, MGC80163, CIRBP,L, POU5F3,3,L, CIRBP,S, MRPL11,L, POU5F3,2,L, MSX1,L, DLX6,L, DAZL,L, LSM6,S, BIX1,1,L, ETS2,L, PRMT1,L, LSM7,L, FOXD4L1,2,L,…	190	1621	5556	1.37101	0.678351	0.0835551	1.66572
GOTERM_BP_FAT	GO:0008380	RNA splicing	3.21931	12	3.62538	0.00110193	YBX1,S, LSM7,L, TXNL4A,S, SNRPF,S, SNRNP27,S, SNRPB2,L, ALYREF,L, RBMX,S, LSM6,S, MAGOH,L, RBM8A,L, FRG1,L	190	109	5556	3.21931	0.694995	0.081319	1.74307
GOTERM_BP_FAT	GO:0003002	regionalization	3.74899	10	3.02115	0.00120881	VENTX3,2,S, CIRBP,L, FOXI4,2,L, VENTX1,2,S, WNT11B,L, VENTX1,1,S, FOXI4,2,S, WNT8A,L, HES7,1,L, VENTX1,1,L	190	78	5556	3.74899	0.728197	0.083181	1.91062
GOTERM_BP_FAT	GO:0048598	embryonic morphogenesis	3.07812	12	3.62538	0.00159407	CIRBP,L, MGC83242, VENTX1,2,S, CIRBP,S, WNT11B,L, VENTX1,1,S, POU5F3,2,L, SDC4,S, VEGT,L, WNT11,L, SDC4,L, VENTX1,1,L	190	114	5556	3.07812	0.820609	0.101822	2.51233
GOTERM_BP_FAT	GO:0007389	pattern specification process	3.21663	11	3.32326	0.00197865	VENTX3,2,S, CIRBP,L, FOXI4,2,L, VENTX1,2,S, WNT11B,L, VENTX1,1,S, FOXI4,2,S, WNT11,L, WNT8A,L, HES7,1,L, VENTX1,1,L	190	100	5556	3.21663	0.881533	0.117925	3.10952
GOTERM_BP_FAT	GO:0007178	transmembrane receptor protein serine/threonine kinase signaling pathway	4.33216	8	2.41692	0.00215512	VENTX3,2,S, VENTX1,2,S, POU5F3,3,L, VENTX1,1,S, POU5F3,2,L, FOXF1,L, NOG,L, VENTX1,1,L	190	54	5556	4.33216	0.902077	0.121103	3.3824
GOTERM_BP_FAT	GO:0031324	negative regulation of cellular metabolic process	2.23982	18	5.43807	0.0024783	FOXD4L1,2,L, WNT11B,L, VENTX1,2,S, VENTX1,1,S, RBMX,S, SRP9,L, VENTX3,2,S, CIRBP,L, XIAP,L, CIRBP,S, POU5F3,3,L, GMNN,S, ID3,L, POU5F3,2,L, ID3,S, HES7,1,L, HES4,S, VENTX1,1,L	190	235	5556	2.23982	0.930917	0.131211	3.88027
GOTERM_BP_FAT	GO:0016070	RNA metabolic process	1.37365	66	19.9396	0.00282824	MSX1,S, SNRPD3,S, VENTX1,1,S, SNRNP27,S, DLX5,L, PABPN1,S, SUPT4H1,L, PABPN1,L, ID3,L, ATF3,L, SNRPB2,L, TAF13,S, ID3,S, VENTX1,1,L, ETS2,S, YBX1,S, FOS,S, JUND,S, VENTX1,2,S, SNRPF,S, RBMX,S, THAP1,L, VEGT,L, RBM8A,L, CIRBP,L, POU5F3,3,L, CIRBP,S, POU5F3,2,L, MSX1,L, DLX6,L, LSM6,S, BIX1,1,L, ETS2,L, PRMT1,L, LSM7,L, FOXD4L1,2,L, TXNL4A,S, FOXI4,2,L, WNT11B,L, NR4A1,S, FRG1,L, NOG,L, JUNB,L, EOM…	190	1405	5556	1.37365	0.952656	0.141455	4.41666
GOTERM_BP_FAT	GO:0045596	negative regulation of cell differentiation	4.76034	7	2.1148	0.0030557	PRMT1,L, HMGB3,S, MGC83242, POU5F3,2,L, WNT8A,L, NOG,L, VENTX1,1,L	190	43	5556	4.76034	0.96297	0.145256	4.76381
GOTERM_BP_FAT	GO:0019219	regulation of nucleobase-containing compound metabolic process	1.4996	46	13.8973	0.00353858	MSX1,S, PRMT1,L, FOXD4L1,2,L, FOXI4,2,L, WNT11B,L, VENTX1,1,S, NOG,L, DLX5,L, JUNB,L, SUPT4H1,L, VENTX2,1,S, VENTX2,1,L, MED30,S, GMNN,S, ATF3,L, ID3,L, ID3,S, HES7,1,L, RPS3,L, MCTS1,L, VENTX1,1,L, YBX1,S, RPS3,S, BRCC3,L, FOS,S, JUND,S, EGR1,L, VENTX1,2,S, FOXF1,L, RBMX,S, VEGT,L, THAP1,L, RBM8A,L, VENTX3,2,S, CIRBP,L, CIRBP,S, POU5F3,3,L, FZD8,S, FOXI4,2,S, POU5F3,2,L, MSX1,L, DLX6,L, WNT8A,L,…	190	897	5556	1.4996	0.978024	0.159314	5.49686
GOTERM_BP_FAT	GO:0010605	negative regulation of macromolecule metabolic process	2.13967	18	5.43807	0.00398683	FOXD4L1,2,L, WNT11B,L, VENTX1,2,S, VENTX1,1,S, RBMX,S, SRP9,L, VENTX3,2,S, CIRBP,L, XIAP,L, CIRBP,S, POU5F3,3,L, GMNN,S, ID3,L, POU5F3,2,L, ID3,S, HES7,1,L, HES4,S, VENTX1,1,L	190	246	5556	2.13967	0.986464	0.170607	6.1726
GOTERM_BP_FAT	GO:2000112	regulation of cellular macromolecule biosynthetic process	1.4715	47	14.1994	0.00453923	MSX1,S, PRMT1,L, FOXD4L1,2,L, FOXI4,2,L, WNT11B,L, VENTX1,1,S, NOG,L, DLX5,L, JUNB,L, SRP9,L, SUPT4H1,L, VENTX2,1,S, VENTX2,1,L, MED30,S, GMNN,S, ATF3,L, ID3,L, ID3,S, HES7,1,L, RPS3,L, MCTS1,L, VENTX1,1,L, YBX1,S, RPS3,S, FOS,S, JUND,S, EGR1,L, VENTX1,2,S, FOXF1,L, RBMX,S, VEGT,L, THAP1,L, RBM8A,L, VENTX3,2,S, CIRBP,L, CIRBP,S, POU5F3,3,L, FZD8,S, FOXI4,2,S, POU5F3,2,L, DAZL,L, MSX1,L, DLX6,L, W…	190	934	5556	1.4715	0.992553	0.184669	6.99912
GOTERM_BP_FAT	GO:0010556	regulation of macromolecule biosynthetic process	1.46992	47	14.1994	0.00463448	MSX1,S, PRMT1,L, FOXD4L1,2,L, FOXI4,2,L, WNT11B,L, VENTX1,1,S, NOG,L, DLX5,L, JUNB,L, SRP9,L, SUPT4H1,L, VENTX2,1,S, VENTX2,1,L, MED30,S, GMNN,S, ATF3,L, ID3,L, ID3,S, HES7,1,L, RPS3,L, MCTS1,L, VENTX1,1,L, YBX1,S, RPS3,S, FOS,S, JUND,S, EGR1,L, VENTX1,2,S, FOXF1,L, RBMX,S, VEGT,L, THAP1,L, RBM8A,L, VENTX3,2,S, CIRBP,L, CIRBP,S, POU5F3,3,L, FZD8,S, FOXI4,2,S, POU5F3,2,L, DAZL,L, MSX1,L, DLX6,L, W…	190	935	5556	1.46992	0.993282	0.181365	7.14094
GOTERM_BP_FAT	GO:0043009	chordate embryonic development	3.77317	8	2.41692	0.00476276	MGC83242, ID3,L, SDC4,S, SDC4,L, ID3,S, WNT8A,L, HES7,1,L, HES4,S	190	62	5556	3.77317	0.994153	0.179433	7.33164
GOTERM_BP_FAT	GO:0009792	embryo development ending in birth or egg hatching	3.77317	8	2.41692	0.00476276	MGC83242, ID3,L, SDC4,S, SDC4,L, ID3,S, WNT8A,L, HES7,1,L, HES4,S	190	62	5556	3.77317	0.994153	0.179433	7.33164
GOTERM_BP_FAT	GO:0051171	regulation of nitrogen compound metabolic process	1.45302	48	14.5015	0.00518572	MSX1,S, PRMT1,L, FOXD4L1,2,L, FOXI4,2,L, WNT11B,L, VENTX1,1,S, NOG,L, DLX5,L, JUNB,L, SRP9,L, SUPT4H1,L, VENTX2,1,S, VENTX2,1,L, MED30,S, GMNN,S, ATF3,L, ID3,L, ID3,S, HES7,1,L, RPS3,L, MCTS1,L, VENTX1,1,L, YBX1,S, RPS3,S, BRCC3,L, FOS,S, JUND,S, EGR1,L, VENTX1,2,S, FOXF1,L, RBMX,S, VEGT,L, THAP1,L, RBM8A,L, VENTX3,2,S, CIRBP,L, CIRBP,S, POU5F3,3,L, FZD8,S, FOXI4,2,S, POU5F3,2,L, DAZL,L, MSX1,L, …	190	966	5556	1.45302	0.9963	0.187298	7.95776
GOTERM_BP_FAT	GO:0009892	negative regulation of metabolic process	2.04015	18	5.43807	0.00642671	FOXD4L1,2,L, WNT11B,L, VENTX1,2,S, VENTX1,1,S, RBMX,S, SRP9,L, VENTX3,2,S, CIRBP,L, XIAP,L, CIRBP,S, POU5F3,3,L, GMNN,S, ID3,L, POU5F3,2,L, ID3,S, HES7,1,L, HES4,S, VENTX1,1,L	190	258	5556	2.04015	0.999036	0.219637	9.77204
GOTERM_BP_FAT	GO:0040007	growth	3.13308	9	2.71903	0.00738942	LEFTY,L, NODAL,L, WNT11B,L, BMP4,S, HTRA1,S, ADMP,S, CYR61,S, BMP2,S, ADMP2,L	190	84	5556	3.13308	0.99966	0.240767	11.1563
GOTERM_BP_FAT	GO:0051252	regulation of RNA metabolic process	1.46551	43	12.9909	0.00767705	MSX1,S, PRMT1,L, FOXD4L1,2,L, FOXI4,2,L, WNT11B,L, VENTX1,1,S, NOG,L, DLX5,L, JUNB,L, SUPT4H1,L, VENTX2,1,S, VENTX2,1,L, MED30,S, ATF3,L, ID3,L, HES7,1,L, ID3,S, RPS3,L, MCTS1,L, VENTX1,1,L, YBX1,S, RPS3,S, FOS,S, JUND,S, EGR1,L, VENTX1,2,S, FOXF1,L, RBMX,S, VEGT,L, THAP1,L, RBM8A,L, VENTX3,2,S, CIRBP,L, CIRBP,S, POU5F3,3,L, FZD8,S, FOXI4,2,S, POU5F3,2,L, MSX1,L, DLX6,L, WNT8A,L, BIX1,1,L, HES4,S	190	858	5556	1.46551	0.999752	0.241695	11.566
GOTERM_BP_FAT	GO:0010558	negative regulation of macromolecule biosynthetic process	2.27439	14	4.22961	0.00797443	VENTX3,2,S, SRP9,L, FOXD4L1,2,L, POU5F3,3,L, VENTX1,2,S, WNT11B,L, GMNN,S, VENTX1,1,S, ID3,L, POU5F3,2,L, ID3,S, HES7,1,L, HES4,S, VENTX1,1,L	190	180	5556	2.27439	0.99982	0.242823	11.9878
GOTERM_BP_FAT	GO:2000113	negative regulation of cellular macromolecule biosynthetic process	2.27439	14	4.22961	0.00797443	VENTX3,2,S, SRP9,L, FOXD4L1,2,L, POU5F3,3,L, VENTX1,2,S, WNT11B,L, GMNN,S, VENTX1,1,S, ID3,L, POU5F3,2,L, ID3,S, HES7,1,L, HES4,S, VENTX1,1,L	190	180	5556	2.27439	0.99982	0.242823	11.9878
GOTERM_BP_FAT	GO:0006357	regulation of transcription from RNA polymerase II promoter	1.99378	18	5.43807	0.00803934	FOS,S, EGR1,L, JUND,S, VENTX1,2,S, VENTX1,1,S, FOXF1,L, RBMX,S, VEGT,L, NOG,L, JUNB,L, VENTX3,2,S, ATF3,L, ID3,L, POU5F3,2,L, ID3,S, HES7,1,L, HES4,S, VENTX1,1,L	190	264	5556	1.99378	0.999832	0.237892	12.0796
GOTERM_BP_FAT	GO:0031327	negative regulation of cellular biosynthetic process	2.22494	14	4.22961	0.00951522	VENTX3,2,S, SRP9,L, FOXD4L1,2,L, POU5F3,3,L, VENTX1,2,S, WNT11B,L, GMNN,S, VENTX1,1,S, ID3,L, POU5F3,2,L, ID3,S, HES7,1,L, HES4,S, VENTX1,1,L	190	184	5556	2.22494	0.999966	0.26804	14.1429
GOTERM_BP_FAT	GO:0048646	anatomical structure formation involved in morphogenesis	2.31797	13	3.92749	0.00964544	CIRBP,L, MGC83242, VENTX1,2,S, WNT11B,L, VENTX1,1,S, ID3,L, SDC4,S, VEGT,L, SDC4,L, ID3,S, WNT8A,L, HES4,S, VENTX1,1,L	190	164	5556	2.31797	0.999971	0.264362	14.3227
GOTERM_BP_FAT	GO:0009890	negative regulation of biosynthetic process	2.21292	14	4.22961	0.009941	VENTX3,2,S, SRP9,L, FOXD4L1,2,L, POU5F3,3,L, VENTX1,2,S, WNT11B,L, GMNN,S, VENTX1,1,S, ID3,L, POU5F3,2,L, ID3,S, HES7,1,L, HES4,S, VENTX1,1,L	190	185	5556	2.21292	0.999979	0.264665	14.7296
GOTERM_BP_FAT	GO:1902679	negative regulation of RNA biosynthetic process	2.40346	12	3.62538	0.0105659	VENTX3,2,S, FOXD4L1,2,L, VENTX1,2,S, POU5F3,3,L, WNT11B,L, ID3,L, VENTX1,1,S, POU5F3,2,L, ID3,S, HES7,1,L, HES4,S, VENTX1,1,L	190	146	5556	2.40346	0.999989	0.272236	15.584
GOTERM_BP_FAT	GO:1903507	negative regulation of nucleic acid-templated transcription	2.40346	12	3.62538	0.0105659	VENTX3,2,S, FOXD4L1,2,L, VENTX1,2,S, POU5F3,3,L, WNT11B,L, ID3,L, VENTX1,1,S, POU5F3,2,L, ID3,S, HES7,1,L, HES4,S, VENTX1,1,L	190	146	5556	2.40346	0.999989	0.272236	15.584
GOTERM_BP_FAT	GO:0045892	negative regulation of transcription, DNA-templated	2.40346	12	3.62538	0.0105659	VENTX3,2,S, FOXD4L1,2,L, VENTX1,2,S, POU5F3,3,L, WNT11B,L, ID3,L, VENTX1,1,S, POU5F3,2,L, ID3,S, HES7,1,L, HES4,S, VENTX1,1,L	190	146	5556	2.40346	0.999989	0.272236	15.584
GOTERM_BP_FAT	GO:0006396	RNA processing	1.92101	18	5.43807	0.0114397	LSM7,L, RNMT,L, YBX1,S, TXNL4A,S, SNRPD3,S, SNRPF,S, SPDYC,S, SNRNP27,S, RBMX,S, RBM8A,L, FRG1,L, PABPN1,S, ADAT2,L, PABPN1,L, SNRPB2,L, LSM6,S, ALYREF,L, MAGOH,L	190	274	5556	1.92101	0.999996	0.284596	16.7652
GOTERM_BP_FAT	GO:0019752	carboxylic acid metabolic process	2.08872	15	4.53172	0.0117946	LDHC, ARG2,S, SDS,L, LDHB,S, TPI1,S, LTA4H,L, CBS,L, ME2,S, GLUL,L, CYP26A1,S, SDHA,L, PDHA1,L, UEVLD,L, SDHA,S, HIBADH,L	190	210	5556	2.08872	0.999997	0.285571	17.2405
GOTERM_BP_FAT	GO:0043436	oxoacid metabolic process	2.04968	15	4.53172	0.0138325	LDHC, ARG2,S, SDS,L, LDHB,S, TPI1,S, LTA4H,L, CBS,L, ME2,S, GLUL,L, CYP26A1,S, SDHA,L, PDHA1,L, UEVLD,L, SDHA,S, HIBADH,L	190	214	5556	2.04968	1	0.319315	19.9209
GOTERM_BP_FAT	GO:0043066	negative regulation of apoptotic process	4.08029	6	1.81269	0.0145733	SOCS3,L, PIM3,L, XIAP,L, WNT11B,L, SOCS3,S, HES4,S	190	43	5556	4.08029	1	0.326504	20.8749
GOTERM_BP_FAT	GO:0043069	negative regulation of programmed cell death	4.08029	6	1.81269	0.0145733	SOCS3,L, PIM3,L, XIAP,L, WNT11B,L, SOCS3,S, HES4,S	190	43	5556	4.08029	1	0.326504	20.8749
GOTERM_BP_FAT	GO:0010468	regulation of gene expression	1.39396	45	13.5952	0.0148158	MSX1,S, PRMT1,L, FOXD4L1,2,L, FOXI4,2,L, WNT11B,L, VENTX1,1,S, NOG,L, DLX5,L, JUNB,L, SRP9,L, SUPT4H1,L, VENTX2,1,S, VENTX2,1,L, MED30,S, ATF3,L, ID3,L, HES7,1,L, ID3,S, RPS3,L, MCTS1,L, VENTX1,1,L, YBX1,S, RPS3,S, FOS,S, JUND,S, EGR1,L, VENTX1,2,S, FOXF1,L, RBMX,S, VEGT,L, THAP1,L, RBM8A,L, VENTX3,2,S, CIRBP,L, CIRBP,S, POU5F3,3,L, FZD8,S, FOXI4,2,S, POU5F3,2,L, DAZL,L, MSX1,L, DLX6,L, WNT8A,L, …	190	944	5556	1.39396	1	0.324362	21.185
GOTERM_BP_FAT	GO:0014031	mesenchymal cell development	3.98756	6	1.81269	0.0160006	WNT11B,L, ID3,L, WNT11,L, ID3,S, WNT8A,L, HES4,S	190	44	5556	3.98756	1	0.338747	22.6832
GOTERM_BP_FAT	GO:0060548	negative regulation of cell death	3.98756	6	1.81269	0.0160006	SOCS3,L, PIM3,L, XIAP,L, WNT11B,L, SOCS3,S, HES4,S	190	44	5556	3.98756	1	0.338747	22.6832
GOTERM_BP_FAT	GO:0010604	positive regulation of macromolecule metabolic process	1.89739	17	5.13595	0.0160647	PRMT1,L, BRCC3,L, EGR1,L, FOXI4,2,L, WNT11B,L, SPDYC,S, FOXF1,L, RBMX,S, WNT11,L, VEGT,L, SUPT4H1,L, CIRBP,L, CIRBP,S, POU5F3,2,L, FOXI4,2,S, DAZL,L, CD81,L	190	262	5556	1.89739	1	0.333444	22.7634
GOTERM_BP_FAT	GO:0000377	RNA splicing, via transesterification reactions with bulged adenosine as nucleophile	3.35565	7	2.1148	0.0168264	LSM7,L, TXNL4A,S, SNRPF,S, SNRPB2,L, RBMX,S, LSM6,S, RBM8A,L	190	61	5556	3.35565	1	0.339904	23.7116
GOTERM_BP_FAT	GO:0000398	mRNA splicing, via spliceosome	3.35565	7	2.1148	0.0168264	LSM7,L, TXNL4A,S, SNRPF,S, SNRPB2,L, RBMX,S, LSM6,S, RBM8A,L	190	61	5556	3.35565	1	0.339904	23.7116
GOTERM_BP_FAT	GO:0031325	positive regulation of cellular metabolic process	1.88301	17	5.13595	0.0171558	PRMT1,L, BRCC3,L, EGR1,L, FOXI4,2,L, WNT11B,L, SPDYC,S, FOXF1,L, RBMX,S, WNT11,L, VEGT,L, SUPT4H1,L, CIRBP,L, CIRBP,S, POU5F3,2,L, FOXI4,2,S, DAZL,L, CD81,L	190	264	5556	1.88301	1	0.339104	24.1182
GOTERM_BP_FAT	GO:0010629	negative regulation of gene expression	2.05723	14	4.22961	0.0174578	FOXD4L1,2,L, WNT11B,L, VENTX1,2,S, VENTX1,1,S, RBMX,S, SRP9,L, VENTX3,2,S, POU5F3,3,L, ID3,L, POU5F3,2,L, ID3,S, HES7,1,L, HES4,S, VENTX1,1,L	190	199	5556	2.05723	1	0.337907	24.4892
GOTERM_BP_FAT	GO:0006355	regulation of transcription, DNA-templated	1.41437	40	12.0846	0.0184941	MSX1,S, PRMT1,L, FOXD4L1,2,L, FOXI4,2,L, WNT11B,L, VENTX1,1,S, NOG,L, DLX5,L, JUNB,L, SUPT4H1,L, VENTX2,1,S, VENTX2,1,L, MED30,S, ATF3,L, ID3,L, HES7,1,L, ID3,S, RPS3,L, MCTS1,L, VENTX1,1,L, YBX1,S, RPS3,S, FOS,S, JUND,S, EGR1,L, VENTX1,2,S, FOXF1,L, RBMX,S, VEGT,L, THAP1,L, VENTX3,2,S, POU5F3,3,L, FZD8,S, FOXI4,2,S, POU5F3,2,L, MSX1,L, DLX6,L, WNT8A,L, BIX1,1,L, HES4,S	190	827	5556	1.41437	1	0.348031	25.7495
GOTERM_BP_FAT	GO:1903506	regulation of nucleic acid-templated transcription	1.41437	40	12.0846	0.0184941	MSX1,S, PRMT1,L, FOXD4L1,2,L, FOXI4,2,L, WNT11B,L, VENTX1,1,S, NOG,L, DLX5,L, JUNB,L, SUPT4H1,L, VENTX2,1,S, VENTX2,1,L, MED30,S, ATF3,L, ID3,L, HES7,1,L, ID3,S, RPS3,L, MCTS1,L, VENTX1,1,L, YBX1,S, RPS3,S, FOS,S, JUND,S, EGR1,L, VENTX1,2,S, FOXF1,L, RBMX,S, VEGT,L, THAP1,L, VENTX3,2,S, POU5F3,3,L, FZD8,S, FOXI4,2,S, POU5F3,2,L, MSX1,L, DLX6,L, WNT8A,L, BIX1,1,L, HES4,S	190	827	5556	1.41437	1	0.348031	25.7495
GOTERM_BP_FAT	GO:2001141	regulation of RNA biosynthetic process	1.41266	40	12.0846	0.0188336	MSX1,S, PRMT1,L, FOXD4L1,2,L, FOXI4,2,L, WNT11B,L, VENTX1,1,S, NOG,L, DLX5,L, JUNB,L, SUPT4H1,L, VENTX2,1,S, VENTX2,1,L, MED30,S, ATF3,L, ID3,L, HES7,1,L, ID3,S, RPS3,L, MCTS1,L, VENTX1,1,L, YBX1,S, RPS3,S, FOS,S, JUND,S, EGR1,L, VENTX1,2,S, FOXF1,L, RBMX,S, VEGT,L, THAP1,L, VENTX3,2,S, POU5F3,3,L, FZD8,S, FOXI4,2,S, POU5F3,2,L, MSX1,L, DLX6,L, WNT8A,L, BIX1,1,L, HES4,S	190	828	5556	1.41266	1	0.347281	26.158
GOTERM_BP_FAT	GO:0000375	RNA splicing, via transesterification reactions	3.24912	7	2.1148	0.0194781	LSM7,L, TXNL4A,S, SNRPF,S, SNRPB2,L, RBMX,S, LSM6,S, RBM8A,L	190	63	5556	3.24912	1	0.351014	26.9278
GOTERM_BP_FAT	GO:0006366	transcription from RNA polymerase II promoter	1.95818	15	4.53172	0.0197673	EGR1,L, VENTX1,2,S, VENTX1,1,S, FOXF1,L, RBMX,S, VEGT,L, NOG,L, VENTX3,2,S, ID3,L, POU5F3,2,L, TAF13,S, ID3,S, HES7,1,L, HES4,S, VENTX1,1,L	190	224	5556	1.95818	1	0.349525	27.2708
GOTERM_BP_FAT	GO:0051241	negative regulation of multicellular organismal process	3.73303	6	1.81269	0.0208329	PRMT1,L, ANXA5,L, MGC83242, WNT8A,L, HES4,S, VENTX1,1,L	190	47	5556	3.73303	1	0.358913	28.5216
GOTERM_BP_FAT	GO:0010557	positive regulation of macromolecule biosynthetic process	2.07731	13	3.92749	0.0214614	PRMT1,L, EGR1,L, FOXI4,2,L, WNT11B,L, FOXF1,L, RBMX,S, VEGT,L, SUPT4H1,L, CIRBP,L, CIRBP,S, POU5F3,2,L, FOXI4,2,S, DAZL,L	190	183	5556	2.07731	1	0.361949	29.2498
GOTERM_BP_FAT	GO:1903312	negative regulation of mRNA metabolic process	12.5323	3	0.906344	0.0215958	CIRBP,L, CIRBP,S, RBMX,S	190	7	5556	12.5323	1	0.358311	29.4047
GOTERM_BP_FAT	GO:0048762	mesenchymal cell differentiation	3.65526	6	1.81269	0.0226338	WNT11B,L, ID3,L, WNT11,L, ID3,S, WNT8A,L, HES4,S	190	48	5556	3.65526	1	0.36657	30.5898
GOTERM_BP_FAT	GO:0051093	negative regulation of developmental process	3.65526	6	1.81269	0.0226338	PRMT1,L, MGC83242, POU5F3,2,L, WNT8A,L, HES4,S, VENTX1,1,L	190	48	5556	3.65526	1	0.36657	30.5898
GOTERM_BP_FAT	GO:0009893	positive regulation of metabolic process	1.82094	17	5.13595	0.0227915	PRMT1,L, BRCC3,L, EGR1,L, FOXI4,2,L, WNT11B,L, SPDYC,S, FOXF1,L, RBMX,S, WNT11,L, VEGT,L, SUPT4H1,L, CIRBP,L, CIRBP,S, POU5F3,2,L, FOXI4,2,S, DAZL,L, CD81,L	190	273	5556	1.82094	1	0.363305	30.7682
GOTERM_BP_FAT	GO:0048729	tissue morphogenesis	2.78496	8	2.41692	0.0235225	MGC83242, VENTX1,2,S, WNT11B,L, VENTX1,1,S, SDC4,S, VEGT,L, SDC4,L, VENTX1,1,L	190	84	5556	2.78496	1	0.367323	31.5896
GOTERM_BP_FAT	GO:0021915	neural tube development	6.15623	4	1.20846	0.025126	SDC4,S, SDC4,L, HES7,1,L, HES4,S	190	19	5556	6.15623	1	0.381721	33.3594
GOTERM_BP_FAT	GO:0051173	positive regulation of nitrogen compound metabolic process	1.9588	14	4.22961	0.0251709	PRMT1,L, BRCC3,L, EGR1,L, FOXI4,2,L, WNT11B,L, FOXF1,L, RBMX,S, VEGT,L, SUPT4H1,L, CIRBP,L, CIRBP,S, POU5F3,2,L, FOXI4,2,S, DAZL,L	190	209	5556	1.9588	1	0.377107	33.4083
GOTERM_BP_FAT	GO:0010628	positive regulation of gene expression	1.9903	13	3.92749	0.0288378	PRMT1,L, EGR1,L, FOXI4,2,L, WNT11B,L, FOXF1,L, RBMX,S, VEGT,L, SUPT4H1,L, CIRBP,L, CIRBP,S, POU5F3,2,L, FOXI4,2,S, DAZL,L	190	191	5556	1.9903	1	0.413833	37.293
GOTERM_BP_FAT	GO:0032270	positive regulation of cellular protein metabolic process	2.96659	7	2.1148	0.0291063	CIRBP,L, CIRBP,S, WNT11B,L, SPDYC,S, DAZL,L, WNT11,L, CD81,L	190	69	5556	2.96659	1	0.41152	37.569
GOTERM_BP_FAT	GO:0060429	epithelium development	2.65837	8	2.41692	0.0294622	MGC83242, WNT11B,L, POU5F3,2,L, SDC4,S, SDC4,L, HES7,1,L, HES4,S, VENTX1,1,L	190	88	5556	2.65837	1	0.410212	37.9329
GOTERM_BP_FAT	GO:0006082	organic acid metabolic process	1.85077	15	4.53172	0.0303448	LDHC, ARG2,S, SDS,L, LDHB,S, TPI1,S, LTA4H,L, CBS,L, ME2,S, GLUL,L, CYP26A1,S, SDHA,L, PDHA1,L, UEVLD,L, SDHA,S, HIBADH,L	190	237	5556	1.85077	1	0.414496	38.8271
GOTERM_BP_FAT	GO:0009891	positive regulation of biosynthetic process	1.96968	13	3.92749	0.0309331	PRMT1,L, EGR1,L, FOXI4,2,L, WNT11B,L, FOXF1,L, RBMX,S, VEGT,L, SUPT4H1,L, CIRBP,L, CIRBP,S, POU5F3,2,L, FOXI4,2,S, DAZL,L	190	193	5556	1.96968	1	0.415595	39.4164
GOTERM_BP_FAT	GO:0031328	positive regulation of cellular biosynthetic process	1.96968	13	3.92749	0.0309331	PRMT1,L, EGR1,L, FOXI4,2,L, WNT11B,L, FOXF1,L, RBMX,S, VEGT,L, SUPT4H1,L, CIRBP,L, CIRBP,S, POU5F3,2,L, FOXI4,2,S, DAZL,L	190	193	5556	1.96968	1	0.415595	39.4164
GOTERM_BP_FAT	GO:0051247	positive regulation of protein metabolic process	2.92421	7	2.1148	0.030968	CIRBP,L, CIRBP,S, WNT11B,L, SPDYC,S, DAZL,L, WNT11,L, CD81,L	190	70	5556	2.92421	1	0.411026	39.4512
GOTERM_BP_FAT	GO:0000122	negative regulation of transcription from RNA polymerase II promoter	2.5993	8	2.41692	0.0327815	VENTX3,2,S, VENTX1,2,S, ID3,L, VENTX1,1,S, ID3,S, HES7,1,L, HES4,S, VENTX1,1,L	190	90	5556	2.5993	1	0.424356	41.2333
GOTERM_BP_FAT	GO:0034645	cellular macromolecule biosynthetic process	1.23479	66	19.9396	0.0328317	MSX1,S, RPS28P9,S, RPS23,L, VENTX1,1,S, MRPL3,S, DLX5,L, SUPT4H1,L, ATF3,L, ID3,L, TAF13,S, ID3,S, VENTX1,1,L, ETS2,S, CDC6,L, YBX1,S, FOS,S, JUND,S, VENTX1,2,S, RPL10A,S, RBMX,S, THAP1,L, VEGT,L, RBM8A,L, MGC80163, CIRBP,L, CIRBP,S, POU5F3,3,L, MRPL11,L, POU5F3,2,L, XCDC6, MSX1,L, DLX6,L, DAZL,L, BIX1,1,L, ETS2,L, PRMT1,L, FOXD4L1,2,L, FOXI4,2,L, WNT11B,L, NR4A1,S, RPL22L1,L, NOG,L, JUNB,L, SRP9…	190	1563	5556	1.23479	1	0.420011	41.282
GOTERM_BP_FAT	GO:0006378	mRNA polyadenylation	9.74737	3	0.906344	0.0354029	PABPN1,S, PABPN1,L, SPDYC,S	190	9	5556	9.74737	1	0.439769	43.7227
GOTERM_BP_FAT	GO:0065009	regulation of molecular function	2.07525	11	3.32326	0.0377333	PABPN1,S, XIAP,L, PABPN1,L, WNT11B,L, SPDYC,S, ID3,L, FZD8,S, CTSB,L, CD81,L, ID3,S, WNT8A,L	190	155	5556	2.07525	1	0.456213	45.8526
GOTERM_BP_FAT	GO:0000165	MAPK cascade	3.19005	6	1.81269	0.038068	PABPN1,S, PABPN1,L, WNT11B,L, SPDYC,S, WNT11,L, CD81,L	190	55	5556	3.19005	1	0.45436	46.1521
GOTERM_BP_FAT	GO:0023014	signal transduction by protein phosphorylation	3.19005	6	1.81269	0.038068	PABPN1,S, PABPN1,L, WNT11B,L, SPDYC,S, WNT11,L, CD81,L	190	55	5556	3.19005	1	0.45436	46.1521
GOTERM_BP_FAT	GO:0060070	canonical Wnt signaling pathway	3.84765	5	1.51057	0.0388816	XIAP,L, WNT11B,L, FZD8,S, WNT11,L, WNT8A,L	190	38	5556	3.84765	1	0.456737	46.874
GOTERM_BP_FAT	GO:0007166	cell surface receptor signaling pathway	1.66569	18	5.43807	0.0395603	WNT11B,L, VENTX1,2,S, VENTX1,1,S, FOXF1,L, SDC4,S, WNT11,L, SDC4,L, FRZB-1, NOG,L, VENTX3,2,S, XIAP,L, POU5F3,3,L, FZD8,S, POU5F3,2,L, WNT8A,L, HES4,S, VENTX1,1,L, DKK1,S	190	316	5556	1.66569	1	0.457889	47.4691
GOTERM_BP_FAT	GO:0097659	nucleic acid-templated transcription	1.29128	48	14.5015	0.0406229	MSX1,S, PRMT1,L, FOXD4L1,2,L, FOXI4,2,L, NR4A1,S, WNT11B,L, VENTX1,1,S, NOG,L, DLX5,L, JUNB,L, EOMES,S, SUPT4H1,L, VENTX2,1,S, POLR2D,L, VENTX2,1,L, MED30,S, ATF3,L, ID3,L, TAF13,S, HES7,1,L, ID3,S, RPS3,L, MCTS1,L, VENTX1,1,L, ETS2,S, YBX1,S, RPS3,S, FOS,S, JUND,S, EGR1,L, VENTX1,2,S, FOXF1,L, RBMX,S, VEGT,L, THAP1,L, VENTX3,2,S, POU5F3,3,L, FZD8,S, FOXI4,2,S, POU5F3,2,L, JUN,L, MSX1,L, DLX6,L, …	190	1087	5556	1.29128	1	0.462237	48.3884
GOTERM_BP_FAT	GO:0032774	RNA biosynthetic process	1.28773	48	14.5015	0.0423693	MSX1,S, PRMT1,L, FOXD4L1,2,L, FOXI4,2,L, NR4A1,S, WNT11B,L, VENTX1,1,S, NOG,L, DLX5,L, JUNB,L, EOMES,S, SUPT4H1,L, VENTX2,1,S, POLR2D,L, VENTX2,1,L, MED30,S, ATF3,L, ID3,L, TAF13,S, HES7,1,L, ID3,S, RPS3,L, MCTS1,L, VENTX1,1,L, ETS2,S, YBX1,S, RPS3,S, FOS,S, JUND,S, EGR1,L, VENTX1,2,S, FOXF1,L, RBMX,S, VEGT,L, THAP1,L, VENTX3,2,S, POU5F3,3,L, FZD8,S, FOXI4,2,S, POU5F3,2,L, JUN,L, MSX1,L, DLX6,L, …	190	1090	5556	1.28773	1	0.472033	49.8666
GOTERM_BP_FAT	GO:0031124	mRNA 3'-end processing	8.77263	3	0.906344	0.0432796	PABPN1,S, PABPN1,L, SPDYC,S	190	10	5556	8.77263	1	0.474776	50.6213
GOTERM_BP_FAT	GO:0044093	positive regulation of molecular function	2.65837	7	2.1148	0.046185	PABPN1,S, PABPN1,L, WNT11B,L, SPDYC,S, FZD8,S, CD81,L, WNT8A,L	190	77	5556	2.65837	1	0.492886	52.9594
GOTERM_BP_FAT	GO:0060485	mesenchyme development	3.02505	6	1.81269	0.0462608	WNT11B,L, ID3,L, WNT11,L, ID3,S, WNT8A,L, HES4,S	190	58	5556	3.02505	1	0.488911	53.019
GOTERM_BP_FAT	GO:0043410	positive regulation of MAPK cascade	4.87368	4	1.20846	0.046392	WNT11B,L, SPDYC,S, WNT11,L, CD81,L	190	24	5556	4.87368	1	0.485428	53.122
GOTERM_BP_FAT	GO:0071363	cellular response to growth factor stimulus	2.62429	7	2.1148	0.0486796	VENTX3,2,S, VENTX1,2,S, VENTX1,1,S, POU5F3,2,L, FOXF1,L, NOG,L, VENTX1,1,L	190	78	5556	2.62429	1	0.497954	54.8837
GOTERM_BP_FAT	GO:0051347	positive regulation of transferase activity	4.67874	4	1.20846	0.0514406	PABPN1,S, PABPN1,L, SPDYC,S, CD81,L	190	25	5556	4.67874	1	0.513231	56.9275
GOTERM_BP_FAT	GO:0070848	response to growth factor	2.55868	7	2.1148	0.0539146	VENTX3,2,S, VENTX1,2,S, VENTX1,1,S, POU5F3,2,L, FOXF1,L, NOG,L, VENTX1,1,L	190	80	5556	2.55868	1	0.525799	58.6846
GOTERM_BP_FAT	GO:0045727	positive regulation of translation	7.31053	3	0.906344	0.0607252	CIRBP,L, CIRBP,S, DAZL,L	190	12	5556	7.31053	1	0.565246	63.1813
GOTERM_BP_FAT	GO:0034250	positive regulation of cellular amide metabolic process	7.31053	3	0.906344	0.0607252	CIRBP,L, CIRBP,S, DAZL,L	190	12	5556	7.31053	1	0.565246	63.1813
GOTERM_BP_FAT	GO:0006351	transcription, DNA-templated	1.28778	41	12.3867	0.0634353	PRMT1,L, FOXD4L1,2,L, FOXI4,2,L, NR4A1,S, WNT11B,L, VENTX1,1,S, NOG,L, JUNB,L, EOMES,S, SUPT4H1,L, POLR2D,L, MED30,S, ATF3,L, ID3,L, TAF13,S, HES7,1,L, ID3,S, RPS3,L, MCTS1,L, VENTX1,1,L, ETS2,S, YBX1,S, RPS3,S, FOS,S, JUND,S, EGR1,L, VENTX1,2,S, FOXF1,L, RBMX,S, VEGT,L, THAP1,L, VENTX3,2,S, POU5F3,3,L, FZD8,S, FOXI4,2,S, POU5F3,2,L, JUN,L, WNT8A,L, NR4A1,L, HES4,S, ETS2,L	190	931	5556	1.28778	1	0.577163	64.8396
GOTERM_BP_FAT	GO:0043604	amide biosynthetic process	1.66148	15	4.53172	0.0646308	RPS3,S, RPS28P9,S, RPS23,L, RPL22L1,L, ARG2,S, RPL10A,S, MGC80163, MRPL3,S, SRP9,L, CIRBP,L, CIRBP,S, MRPL11,L, DAZL,L, RPS3,L, MGC82136	190	264	5556	1.66148	1	0.579778	65.5486
GOTERM_BP_FAT	GO:0034654	nucleobase-containing compound biosynthetic process	1.23866	51	15.4079	0.0647913	MSX1,S, VENTX1,1,S, DLX5,L, SUPT4H1,L, ATF3,L, ID3,L, TAF13,S, ID3,S, VENTX1,1,L, ETS2,S, YBX1,S, FOS,S, JUND,S, VENTX1,2,S, RBMX,S, THAP1,L, VEGT,L, PAICS,1,S, ADSL,L, POU5F3,3,L, POU5F3,2,L, MSX1,L, DLX6,L, BIX1,1,L, ETS2,L, PRMT1,L, FOXD4L1,2,L, FOXI4,2,L, NR4A1,S, WNT11B,L, NOG,L, EOMES,S, JUNB,L, UQCC3,L, POLR2D,L, VENTX2,1,S, VENTX2,1,L, MED30,S, HES7,1,L, RPS3,L, MCTS1,L, RPS3,S, EGR1,L, F…	190	1204	5556	1.23866	1	0.576351	65.6427
GOTERM_BP_FAT	GO:0032268	regulation of cellular protein metabolic process	1.75183	13	3.92749	0.0653086	PRMT1,L, RPS3,S, WNT11B,L, SPDYC,S, WNT11,L, RBM8A,L, SRP9,L, CIRBP,L, XIAP,L, CIRBP,S, DAZL,L, CD81,L, RPS3,L	190	217	5556	1.75183	1	0.575039	65.9446
GOTERM_BP_FAT	GO:0045682	regulation of epidermis development	29.2421	2	0.60423	0.0668833	POU5F3,2,L, VENTX1,1,L	190	2	5556	29.2421	1	0.579757	66.8482
GOTERM_BP_FAT	GO:1904245	regulation of polynucleotide adenylyltransferase activity	29.2421	2	0.60423	0.0668833	PABPN1,S, PABPN1,L	190	2	5556	29.2421	1	0.579757	66.8482
GOTERM_BP_FAT	GO:0071219	cellular response to molecule of bacterial origin	29.2421	2	0.60423	0.0668833	PABPN1,S, PABPN1,L	190	2	5556	29.2421	1	0.579757	66.8482
GOTERM_BP_FAT	GO:0009913	epidermal cell differentiation	29.2421	2	0.60423	0.0668833	POU5F3,2,L, VENTX1,1,L	190	2	5556	29.2421	1	0.579757	66.8482
GOTERM_BP_FAT	GO:0045604	regulation of epidermal cell differentiation	29.2421	2	0.60423	0.0668833	POU5F3,2,L, VENTX1,1,L	190	2	5556	29.2421	1	0.579757	66.8482
GOTERM_BP_FAT	GO:0006105	succinate metabolic process	29.2421	2	0.60423	0.0668833	SDHA,L, SDHA,S	190	2	5556	29.2421	1	0.579757	66.8482
GOTERM_BP_FAT	GO:0043497	regulation of protein heterodimerization activity	29.2421	2	0.60423	0.0668833	ID3,L, ID3,S	190	2	5556	29.2421	1	0.579757	66.8482
GOTERM_BP_FAT	GO:0071222	cellular response to lipopolysaccharide	29.2421	2	0.60423	0.0668833	PABPN1,S, PABPN1,L	190	2	5556	29.2421	1	0.579757	66.8482
GOTERM_BP_FAT	GO:0071216	cellular response to biotic stimulus	29.2421	2	0.60423	0.0668833	PABPN1,S, PABPN1,L	190	2	5556	29.2421	1	0.579757	66.8482
GOTERM_BP_FAT	GO:1904247	positive regulation of polynucleotide adenylyltransferase activity	29.2421	2	0.60423	0.0668833	PABPN1,S, PABPN1,L	190	2	5556	29.2421	1	0.579757	66.8482
GOTERM_BP_FAT	GO:0048332	mesoderm morphogenesis	4.17744	4	1.20846	0.0680899	VENTX1,2,S, VENTX1,1,S, VEGT,L, VENTX1,1,L	190	28	5556	4.17744	1	0.582293	67.5253
GOTERM_BP_FAT	GO:0001707	mesoderm formation	4.17744	4	1.20846	0.0680899	VENTX1,2,S, VENTX1,1,S, VEGT,L, VENTX1,1,L	190	28	5556	4.17744	1	0.582293	67.5253
GOTERM_BP_FAT	GO:0043631	RNA polyadenylation	6.74818	3	0.906344	0.0702003	PABPN1,S, PABPN1,L, SPDYC,S	190	13	5556	6.74818	1	0.589674	68.6787
GOTERM_BP_FAT	GO:1903311	regulation of mRNA metabolic process	4.03339	4	1.20846	0.0741199	CIRBP,L, CIRBP,S, RBMX,S, RBM8A,L	190	29	5556	4.03339	1	0.606201	70.7194
GOTERM_BP_FAT	GO:0060027	convergent extension involved in gastrulation	6.26617	3	0.906344	0.0801188	WNT11B,L, SDC4,S, SDC4,L	190	14	5556	6.26617	1	0.63188	73.603
GOTERM_BP_FAT	GO:0022904	respiratory electron transport chain	6.26617	3	0.906344	0.0801188	UQCC3,L, SDHA,L, SDHA,S	190	14	5556	6.26617	1	0.63188	73.603
GOTERM_BP_FAT	GO:0014029	neural crest formation	3.89895	4	1.20846	0.0803786	ID3,L, ID3,S, WNT8A,L, HES4,S	190	30	5556	3.89895	1	0.629057	73.7216
GOTERM_BP_FAT	GO:0051246	regulation of protein metabolic process	1.68954	13	3.92749	0.0806359	PRMT1,L, RPS3,S, WNT11B,L, SPDYC,S, WNT11,L, RBM8A,L, SRP9,L, CIRBP,L, XIAP,L, CIRBP,S, DAZL,L, CD81,L, RPS3,L	190	225	5556	1.68954	1	0.626263	73.8386
GOTERM_BP_FAT	GO:0006412	translation	1.63756	14	4.22961	0.0826851	RPS3,S, RPS28P9,S, RPS23,L, RPL22L1,L, RPL10A,S, MGC80163, MRPL3,S, SRP9,L, CIRBP,L, CIRBP,S, MRPL11,L, DAZL,L, RPS3,L, MGC82136	190	250	5556	1.63756	1	0.631923	74.7533
GOTERM_BP_FAT	GO:2000026	regulation of multicellular organismal development	2.10754	8	2.41692	0.0830248	PRMT1,L, MGC83242, WNT11B,L, POU5F3,2,L, WNT11,L, WNT8A,L, HES4,S, VENTX1,1,L	190	111	5556	2.10754	1	0.629563	74.902
GOTERM_BP_FAT	GO:0007167	enzyme linked receptor protein signaling pathway	2.10754	8	2.41692	0.0830248	VENTX3,2,S, VENTX1,2,S, POU5F3,3,L, VENTX1,1,S, POU5F3,2,L, FOXF1,L, NOG,L, VENTX1,1,L	190	111	5556	2.10754	1	0.629563	74.902
GOTERM_BP_FAT	GO:0006915	apoptotic process	1.86255	10	3.02115	0.0859969	RPS3,S, SOCS3,L, PIM3,L, SGK1,S, XIAP,L, SGK1,L, WNT11B,L, SOCS3,S, RPS3,L, HES4,S	190	157	5556	1.86255	1	0.639197	76.1685
GOTERM_BP_FAT	GO:0043648	dicarboxylic acid metabolic process	5.84842	3	0.906344	0.0904399	ME2,S, SDHA,L, SDHA,S	190	15	5556	5.84842	1	0.654745	77.9504
GOTERM_BP_FAT	GO:0043043	peptide biosynthetic process	1.61177	14	4.22961	0.0909177	RPS3,S, RPS28P9,S, RPS23,L, RPL22L1,L, RPL10A,S, MGC80163, MRPL3,S, SRP9,L, CIRBP,L, CIRBP,S, MRPL11,L, DAZL,L, RPS3,L, MGC82136	190	254	5556	1.61177	1	0.65297	78.1345
GOTERM_BP_FAT	GO:0019438	aromatic compound biosynthetic process	1.20953	51	15.4079	0.0909591	MSX1,S, VENTX1,1,S, DLX5,L, SUPT4H1,L, ATF3,L, ID3,L, TAF13,S, ID3,S, VENTX1,1,L, ETS2,S, YBX1,S, FOS,S, JUND,S, VENTX1,2,S, RBMX,S, THAP1,L, VEGT,L, PAICS,1,S, ADSL,L, POU5F3,3,L, POU5F3,2,L, MSX1,L, DLX6,L, BIX1,1,L, ETS2,L, PRMT1,L, FOXD4L1,2,L, FOXI4,2,L, NR4A1,S, WNT11B,L, NOG,L, EOMES,S, JUNB,L, UQCC3,L, POLR2D,L, VENTX2,1,S, VENTX2,1,L, MED30,S, HES7,1,L, RPS3,L, MCTS1,L, RPS3,S, EGR1,L, F…	190	1233	5556	1.20953	1	0.649377	78.1504
GOTERM_BP_FAT	GO:0198738	cell-cell signaling by wnt	1.93514	9	2.71903	0.091129	XIAP,L, WNT11B,L, FZD8,S, SDC4,S, WNT11,L, SDC4,L, WNT8A,L, FRZB-1, DKK1,S	190	136	5556	1.93514	1	0.646365	78.2154
GOTERM_BP_FAT	GO:1905114	cell surface receptor signaling pathway involved in cell-cell signaling	1.93514	9	2.71903	0.091129	XIAP,L, WNT11B,L, FZD8,S, SDC4,S, WNT11,L, SDC4,L, WNT8A,L, FRZB-1, DKK1,S	190	136	5556	1.93514	1	0.646365	78.2154
GOTERM_BP_FAT	GO:0016055	Wnt signaling pathway	1.93514	9	2.71903	0.091129	XIAP,L, WNT11B,L, FZD8,S, SDC4,S, WNT11,L, SDC4,L, WNT8A,L, FRZB-1, DKK1,S	190	136	5556	1.93514	1	0.646365	78.2154
GOTERM_BP_FAT	GO:0071310	cellular response to organic substance	1.83913	10	3.02115	0.0913413	VENTX3,2,S, PABPN1,S, VENTX1,2,S, PABPN1,L, VENTX1,1,S, POU5F3,2,L, FOXF1,L, RBMX,S, NOG,L, VENTX1,1,L	190	159	5556	1.83913	1	0.643568	78.2964
GOTERM_BP_FAT	GO:1902533	positive regulation of intracellular signal transduction	2.86687	5	1.51057	0.0941688	WNT11B,L, SPDYC,S, MYD88,L, WNT11,L, CD81,L	190	51	5556	2.86687	1	0.651679	79.3489
GOTERM_BP_FAT	GO:0018130	heterocycle biosynthetic process	1.20562	51	15.4079	0.0950823	MSX1,S, VENTX1,1,S, DLX5,L, SUPT4H1,L, ATF3,L, ID3,L, TAF13,S, ID3,S, VENTX1,1,L, ETS2,S, YBX1,S, FOS,S, JUND,S, VENTX1,2,S, RBMX,S, THAP1,L, VEGT,L, PAICS,1,S, ADSL,L, POU5F3,3,L, POU5F3,2,L, MSX1,L, DLX6,L, BIX1,1,L, ETS2,L, PRMT1,L, FOXD4L1,2,L, FOXI4,2,L, NR4A1,S, WNT11B,L, NOG,L, EOMES,S, JUNB,L, UQCC3,L, POLR2D,L, VENTX2,1,S, VENTX2,1,L, MED30,S, HES7,1,L, RPS3,L, MCTS1,L, RPS3,S, EGR1,L, F…	190	1237	5556	1.20562	1	0.651789	79.6785
GOTERM_BP_FAT	GO:0048468	cell development	1.74817	11	3.32326	0.0955279	MGC83242, WNT11B,L, SPDYC,S, ID3,L, POU5F3,2,L, DAZL,L, WNT11,L, ID3,S, WNT8A,L, HES4,S, VENTX1,1,L	190	184	5556	1.74817	1	0.650011	79.8375
GOTERM_BP_FAT	GO:0051100	negative regulation of binding	19.4947	2	0.60423	0.0986368	ID3,L, ID3,S	190	3	5556	19.4947	1	0.658844	80.9149
GOTERM_BP_FAT	GO:0006848	pyruvate transport	19.4947	2	0.60423	0.0986368	MPC1,L, MPC1,S	190	3	5556	19.4947	1	0.658844	80.9149
GOTERM_BP_FAT	GO:0006850	mitochondrial pyruvate transport	19.4947	2	0.60423	0.0986368	MPC1,L, MPC1,S	190	3	5556	19.4947	1	0.658844	80.9149
GOTERM_BP_FAT	GO:0043392	negative regulation of DNA binding	19.4947	2	0.60423	0.0986368	ID3,L, ID3,S	190	3	5556	19.4947	1	0.658844	80.9149
GOTERM_BP_FAT	GO:0051101	regulation of DNA binding	19.4947	2	0.60423	0.0986368	ID3,L, ID3,S	190	3	5556	19.4947	1	0.658844	80.9149
GOTERM_BP_FAT	GO:0008544	epidermis development	19.4947	2	0.60423	0.0986368	POU5F3,2,L, VENTX1,1,L	190	3	5556	19.4947	1	0.658844	80.9149
GOTERM_BP_FAT	GO:0000187	activation of MAPK activity	19.4947	2	0.60423	0.0986368	SPDYC,S, CD81,L	190	3	5556	19.4947	1	0.658844	80.9149
